# Supplementary material for: Identification of Novel Regulators of Leaf Senescence Using a Deep Learning Model
Source: MDPI journal article supplement (doi:10.3390/plants13091276), 2024-05-05
Supplement: s1 [file Supplemental_Tables.xlsx]

## Sheet: S1
Supplemental Table S1. Details of 20 repeats of 10-fold cross validation (CV)
Reapeat	Iteration	Accuracy
1	1	0.846774
1	2	0.818958
1	3	0.8654
1	4	0.842428
1	5	0.851726
1	6	0.799179
1	7	0.775621
1	8	0.811664
1	9	0.817513
1	10	0.814449
2	1	0.862776
2	2	0.800037
2	3	0.858637
2	4	0.816881
2	5	0.867359
2	6	0.798995
2	7	0.760796
2	8	0.79422
2	9	0.830265
2	10	0.809128
3	1	0.851061
3	2	0.79782
3	3	0.87464
3	4	0.821835
3	5	0.850469
3	6	0.777704
3	7	0.759132
3	8	0.810075
3	9	0.829415
3	10	0.810976
4	1	0.837312
4	2	0.791907
4	3	0.863072
4	4	0.815254
4	5	0.865289
4	6	0.785725
4	7	0.761128
4	8	0.79385
4	9	0.809529
4	10	0.811715
5	1	0.851319
5	2	0.794605
5	3	0.860707
5	4	0.828379
5	5	0.857602
5	6	0.80879
5	7	0.766637
5	8	0.802794
5	9	0.818141
5	10	0.816297
6	1	0.849139
6	2	0.818071
6	3	0.864994
6	4	0.83008
6	5	0.856641
6	6	0.792415
6	7	0.770445
6	8	0.799727
6	9	0.813151
6	10	0.801072
7	1	0.844039
7	2	0.798817
7	3	0.876857
7	4	0.825532
7	5	0.851135
7	6	0.801989
7	7	0.771259
7	8	0.804088
7	9	0.816774
7	10	0.799593
8	1	0.850137
8	2	0.801072
8	3	0.876155
8	4	0.834442
8	5	0.846145
8	6	0.792156
8	7	0.756766
8	8	0.818464
8	9	0.816293
8	10	0.813378
9	1	0.855274
9	2	0.808204
9	3	0.857233
9	4	0.848381
9	5	0.84633
9	6	0.820359
9	7	0.775584
9	8	0.801537
9	9	0.823353
9	10	0.810939
10	1	0.853574
10	2	0.796859
10	3	0.873937
10	4	0.843759
10	5	0.851874
10	6	0.799845
10	7	0.758097
10	8	0.785941
10	9	0.822207
10	10	0.829047
11	1	0.865918
11	2	0.780155
11	3	0.868653
11	4	0.821983
11	5	0.857713
11	6	0.807385
11	7	0.776693
11	8	0.810296
11	9	0.824536
11	10	0.819069
12	1	0.848843
12	2	0.801293
12	3	0.878927
12	4	0.835958
12	5	0.856493
12	6	0.794522
12	7	0.77185
12	8	0.787937
12	9	0.811821
12	10	0.811382
13	1	0.856235
13	2	0.808574
13	3	0.861113
13	4	0.8269
13	5	0.842708
13	6	0.800325
13	7	0.755768
13	8	0.790265
13	9	0.82254
13	10	0.810163
14	1	0.848585
14	2	0.796157
14	3	0.868653
14	4	0.81507
14	5	0.864772
14	6	0.778147
14	7	0.769299
14	8	0.81122
14	9	0.824499
14	10	0.822616
15	1	0.861926
15	2	0.797931
15	3	0.867063
15	4	0.838509
15	5	0.859154
15	6	0.806609
15	7	0.76098
15	8	0.804938
15	9	0.81755
15	10	0.819106
16	1	0.864994
16	2	0.810347
16	3	0.868763
16	4	0.820098
16	5	0.857491
16	6	0.781918
16	7	0.753734
16	8	0.792815
16	9	0.817883
16	10	0.814523
17	1	0.861372
17	2	0.800185
17	3	0.87002
17	4	0.840691
17	5	0.860633
17	6	0.804096
17	7	0.757468
17	8	0.80102
17	9	0.838434
17	10	0.805137
18	1	0.844593
18	2	0.80255
18	3	0.865289
18	4	0.837289
18	5	0.85557
18	6	0.798329
18	7	0.780243
18	8	0.78535
18	9	0.812893
18	10	0.816149
19	1	0.862185
19	2	0.807613
19	3	0.862444
19	4	0.819543
19	5	0.840491
19	6	0.794633
19	7	0.766156
19	8	0.798396
19	9	0.818733
19	10	0.806024
20	1	0.850728
20	2	0.807243
20	3	0.855385
20	4	0.851338
20	5	0.852872
20	6	0.802506
20	7	0.765824
20	8	0.790857
20	9	0.829822
20	10	0.820953

## Sheet: S2
Supplemental Table S2. A comparison between the TF target genes derived from the predictor and those identified from DAP-seq analysis
TF	symbol	Target gene count from DEGRN	Target gene count from DAP-seq	Number of overlapped targeted genes	Total number of genes	Enrichment score	Pvalue	Pvalue (BH adjusted)
AT5G13180	NAC083	4477	9759	1991	29182	1.32982	8.01449e-63	2.73294e-60
AT3G18400	NAC058	3594	10209	1711	29182	1.36083	2.24023e-62	3.8196e-60
AT4G10350	BRN2	2319	10772	1160	29182	1.35511	3.29485e-41	3.74514e-39
AT2G40740	WRKY55	3446	7217	1179	29182	1.38343	1.1598e-40	9.88727e-39
AT3G15500	NAC055	2650	6370	859	29182	1.48499	2.80386e-40	1.91223e-38
AT1G12260	NAC007	2701	8416	1083	29182	1.39031	7.46886e-40	4.2448e-38
AT1G29280	WRKY65	4005	10214	1760	29182	1.25554	1.22759e-36	5.98011e-35
AT5G11260	HY5	2853	8124	1088	29182	1.36985	2.16814e-36	9.24169e-35
AT5G62380	NAC101	2371	9419	1038	29182	1.35636	1.58379e-34	6.00082e-33
AT3G04060	anac046	1452	10054	721	29182	1.44127	1.86373e-34	6.35532e-33
AT3G56400	WRKY70	1229	6714	468	29182	1.65511	5.39936e-34	1.6738e-32
AT1G80840	WRKY40	2674	6131	815	29182	1.45071	6.67852e-34	1.89781e-32
AT3G04070	NAC047	3179	6448	977	29182	1.39089	1.9629e-33	5.14883e-32
AT5G11510	MYB3R4	2736	1732	317	29182	1.95214	1.07262e-32	2.6126e-31
AT2G38470	WRKY33	3860	4471	849	29182	1.43559	1.51407e-32	3.44199e-31
AT2G18060	NAC037	2926	5730	823	29182	1.43247	7.73525e-32	1.64858e-30
AT3G10480	ANAC050	1658	8396	686	29182	1.43808	8.66447e-30	1.73799e-28
AT3G01220	ATHB-20	4413	4950	1016	29182	1.35728	1.29997e-29	2.46272e-28
AT1G69780	ATHB-13	4304	13486	2329	29182	1.17093	1.5556e-29	2.7919e-28
AT1G34180	anac016	1426	10965	735	29182	1.37175	2.94827e-28	4.96857e-27
AT5G18270	ANAC087	3407	4785	791	29182	1.41592	3.05982e-28	4.96857e-27
AT1G54330	ANAC020	3950	6180	1105	29182	1.32097	5.22234e-28	8.09463e-27
AT1G29860	WRKY71	3322	7206	1080	29182	1.31657	1.93968e-27	2.87578e-26
AT3G03200	NAC045	2684	9183	1095	29182	1.29647	5.90221e-27	8.38605e-26
AT5G24110	WRKY30	3345	3839	646	29182	1.46802	9.42428e-27	1.28547e-25
AT1G01720	NAC002	2888	7615	995	29182	1.3203	5.56789e-26	7.3025e-25
AT3G28920	ZHD9	1466	14118	903	29182	1.2732	1.32704e-25	1.64005e-24
AT5G15830	AtbZIP3	5102	6440	1412	29182	1.25407	1.34667e-25	1.64005e-24
AT4G36780	BEH2	1998	4944	516	29182	1.52437	1.6262e-25	1.91219e-24
AT5G04410	NAC078	2267	10001	1005	29182	1.29356	3.25005e-25	3.69422e-24
AT5G13080	WRKY75	4637	14151	2568	29182	1.14205	8.0617e-25	8.86787e-24
AT3G15170	NAC054	4672	2763	637	29182	1.44003	2.18805e-24	2.33164e-23
AT2G46270	GBF3	2826	8715	1082	29182	1.28204	3.87549e-24	4.00467e-23
AT1G22070	TGA3	4324	3067	650	29182	1.43031	5.83405e-24	5.8512e-23
AT2G23320	WRKY15	1563	14915	990	29182	1.23928	9.27112e-24	9.03272e-23
AT3G20310	ERF7	1905	10826	911	29182	1.28905	3.16092e-23	2.9941e-22
AT5G46590	anac096	2149	8428	825	29182	1.32925	4.04791e-23	3.73064e-22
AT4G36160	ANAC076	2239	10533	1026	29182	1.26957	4.91742e-23	4.41274e-22
AT1G32150	BZIP68	1484	6979	518	29182	1.45955	8.80652e-23	7.70006e-22
AT5G46350	WRKY8	2295	14033	1328	29182	1.20332	9.13439e-23	7.78707e-22
AT5G67300	MYB44	1432	11038	719	29182	1.32743	1.01788e-22	8.4658e-22
AT3G56850	DPBF3	2060	3936	432	29182	1.55481	1.66111e-22	1.34866e-21
AT4G18170	WRKY28	1465	9623	655	29182	1.35584	5.96862e-22	4.73325e-21
AT1G62300	WRKY6	1459	4646	371	29182	1.59718	7.02141e-22	5.4416e-21
AT4G37260	MYB73	1523	7185	534	29182	1.42406	5.07123e-21	3.84287e-20
AT2G46770	NAC043	2326	10561	1052	29182	1.24973	6.4517e-21	4.78267e-20
AT1G52880	NAC018	1060	4760	290	29182	1.67726	1.49987e-20	1.0882e-19
AT2G43000	JUB1	1818	4985	460	29182	1.4812	3.61796e-20	2.57026e-19
AT1G69010	BIM2	1323	16234	894	29182	1.21469	7.66783e-20	5.33618e-19
AT5G65310	ATHB-5	1419	17060	990	29182	1.19341	1.28334e-19	8.75235e-19
AT5G47370	HAT2	1259	8255	501	29182	1.40673	1.80252e-19	1.20521e-18
AT3G10500	NAC053	1428	5926	428	29182	1.47594	4.04705e-19	2.65393e-18
AT2G35530	BZIP16	3797	5609	936	29182	1.28252	4.65315e-19	2.99382e-18
AT2G30250	WRKY25	958	11329	504	29182	1.35515	1.0862e-18	6.85914e-18
AT1G49480	REM19	4679	15124	2698	29182	1.1126	1.38757e-18	8.60291e-18
AT5G64060	anac103	4163	4624	853	29182	1.29312	4.43422e-18	2.6601e-17
AT1G79580	SMB	3196	15995	1979	29182	1.12972	4.44651e-18	2.6601e-17
AT4G01250	WRKY22	1450	15204	914	29182	1.20986	4.74622e-18	2.79045e-17
AT1G32870	ANAC13	1409	4626	345	29182	1.54461	5.85427e-18	3.38357e-17
AT5G65210	TGA1	2077	7098	670	29182	1.32623	1.22503e-17	6.96227e-17
AT4G17980	anac071	2354	11524	1124	29182	1.20913	1.40585e-17	7.85896e-17
AT1G19210	ERF017	3933	11787	1832	29182	1.15322	1.60506e-17	8.82784e-17
AT1G34190	NAC017	2304	9530	937	29182	1.24532	2.54742e-17	1.37884e-16
AT1G45249	ABF2	1603	2112	208	29182	1.79288	5.36267e-17	2.8573e-16
AT1G30650	WRKY14	3057	7241	949	29182	1.25109	9.61251e-17	5.04287e-16
AT4G16750	ERF039	784	10971	406	29182	1.37746	1.93967e-16	1.00216e-15
AT1G28470	NAC010	3569	16845	2284	29182	1.10865	2.08698e-16	1.06218e-15
AT5G53950	NAC098	3573	3383	566	29182	1.36646	2.44494e-16	1.22513e-15
AT2G36270	ABI5	3954	4496	786	29182	1.29025	2.47901e-16	1.22513e-15
AT5G02320	MYB3R5	803	2334	132	29182	2.05529	1.22719e-15	5.97815e-15
AT4G31800	WRKY18	4273	14136	2309	29182	1.11553	1.33258e-15	6.40015e-15
AT1G53910	RAP2-12	2060	5399	520	29182	1.36439	2.11044e-15	9.99527e-15
AT4G32730	PC-MYB1	1365	11026	655	29182	1.27001	2.37331e-15	1.10863e-14
AT1G08320	TGA9	3791	11043	1654	29182	1.15295	3.02066e-15	1.39195e-14
AT5G06839	TGA10	3324	4299	645	29182	1.31718	3.45595e-15	1.57131e-14
AT5G06960	TGA5	1538	2308	208	29182	1.70996	7.48948e-15	3.36041e-14
AT3G04030	MYR2	1142	12117	601	29182	1.26744	8.17828e-15	3.62181e-14
AT1G71450	ERF021	2926	9574	1146	29182	1.1938	1.42493e-14	6.2295e-14
AT1G77920	TGA7	1585	13618	887	29182	1.19921	1.55003e-14	6.69063e-14
AT1G19850	ARF5	2467	16725	1591	29182	1.12525	1.8111e-14	7.71983e-14
AT3G14180	ASIL2	1603	4937	387	29182	1.42702	2.0847e-14	8.77634e-14
AT5G01380	GT-3A	2753	1235	198	29182	1.69944	4.83484e-14	2.01059e-13
AT1G44830	ERF014	2880	1398	225	29182	1.63079	6.61014e-14	2.71573e-13
AT1G53170	ERF8	1389	7604	484	29182	1.33726	6.94024e-14	2.81741e-13
AT3G55370	OBP3	1707	12069	853	29182	1.20826	8.51986e-14	3.41797e-13
AT3G50060	MYB77	1224	16474	815	29182	1.17948	9.0606e-14	3.59263e-13
AT3G50260	ERF011	1741	14013	985	29182	1.17821	1.01711e-13	3.9866e-13
AT5G39760	ZHD10	915	15422	591	29182	1.2222	1.93996e-13	7.51736e-13
AT4G24240	WRKY7	1315	1772	148	29182	1.85348	2.01926e-13	7.73671e-13
AT5G52830	WRKY27	2243	13734	1219	29182	1.15476	3.91699e-13	1.4841e-12
AT2G23290	AtMYB70	1528	8427	568	29182	1.28726	4.10046e-13	1.53654e-12
AT5G10030	TGA4	1443	6110	414	29182	1.37028	5.09931e-13	1.89007e-12
AT1G70920	ATHB-X	2875	3786	500	29182	1.3405	5.19556e-13	1.90504e-12
AT2G46590	DOF2.5	1843	12280	923	29182	1.19013	5.3242e-13	1.93144e-12
AT2G37590	DOF2.4	1707	13445	928	29182	1.17996	9.30018e-13	3.33827e-12
AT4G22070	WRKY31	4280	3122	594	29182	1.29725	1.00228e-12	3.56019e-12
AT1G69490	NAC029	1792	4202	364	29182	1.41066	1.2568e-12	4.41824e-12
AT5G02840	RVE4	1670	4715	377	29182	1.3972	1.27387e-12	4.43256e-12
AT1G20980	SPL14	1505	2263	193	29182	1.65368	1.75679e-12	6.05117e-12
AT3G18990	VRN1	1857	5211	447	29182	1.348	1.98113e-12	6.75565e-12
AT4G16150	AT4G16150	1670	673	86	29182	2.23297	2.49625e-12	8.42792e-12
AT1G12610	DREB1F	3960	2205	410	29182	1.37024	3.77824e-12	1.26312e-11
AT5G26170	WRKY50	1056	10181	474	29182	1.28659	5.38406e-12	1.78249e-11
AT5G07680	NAC079	1756	2581	239	29182	1.53886	6.16249e-12	2.02058e-11
AT3G15210	ERF4	1562	8393	570	29182	1.2688	6.72489e-12	2.18399e-11
AT1G75240	ZHD5	2810	13403	1461	29182	1.13203	7.23181e-12	2.32646e-11
AT3G10800	BZIP28	2186	1469	182	29182	1.65392	8.05176e-12	2.56603e-11
AT2G35700	ERF038	1180	4367	262	29182	1.48372	9.56218e-12	3.01917e-11
AT2G18350	ZHD6	812	10423	382	29182	1.31713	1.20627e-11	3.77375e-11
AT5G06950	TGA2	1839	10780	815	29182	1.1997	1.22915e-11	3.81038e-11
AT1G30490	ATHB-9	828	7375	294	29182	1.40498	2.0812e-11	6.39359e-11
AT5G67190	ERF010	1470	13413	799	29182	1.18255	2.29143e-11	6.97659e-11
AT3G12250	TGA6	1217	12753	644	29182	1.21087	2.67214e-11	8.0637e-11
AT4G36740	HB-5	3145	16518	1951	29182	1.09596	3.49876e-11	1.04656e-10
AT2G44940	ERF034	1083	4550	249	29182	1.4746	5.25097e-11	1.55703e-10
AT5G09410	EICBP.B	1578	2295	196	29182	1.57936	6.95445e-11	2.04437e-10
AT4G29230	anac075	1893	3776	340	29182	1.38807	7.24898e-11	2.11274e-10
AT1G78700	BEH4	1331	4366	285	29182	1.43119	7.48502e-11	2.16304e-10
AT2G22430	ATHB-6	4401	7960	1376	29182	1.14622	1.0316e-10	2.95609e-10
AT1G74650	ATY13	2784	13683	1465	29182	1.12228	1.09813e-10	3.12051e-10
AT1G03840	MGP	3653	3424	548	29182	1.27853	1.14766e-10	3.23431e-10
AT2G47070	SPL1	1838	7015	557	29182	1.26066	1.36841e-10	3.82482e-10
AT5G62940	DOF5.6	1423	16515	919	29182	1.14116	1.90834e-10	5.29059e-10
AT2G18550	ATHB-21	2370	10741	1013	29182	1.16127	3.30701e-10	9.09427e-10
AT1G29160	DOF1.5	2215	8733	793	29182	1.19633	3.53586e-10	9.64582e-10
AT5G62000	ARF2	3430	9252	1247	29182	1.14671	3.87212e-10	1.04793e-09
AT3G17730	anac057	2558	4565	510	29182	1.27451	7.23534e-10	1.94272e-09
AT1G79180	ATMYB63	4222	2353	443	29182	1.3013	7.90586e-10	2.10617e-09
AT1G28370	ERF11	1680	5657	424	29182	1.30192	8.18834e-10	2.16451e-09
AT5G65130	AT5G65130	3458	1742	288	29182	1.39519	1.56425e-09	4.10315e-09
AT4G06746	RAP2-9	1960	2105	211	29182	1.49241	1.86261e-09	4.84848e-09
AT1G50640	ERF3	2548	2671	319	29182	1.36783	2.08125e-09	5.37656e-09
AT2G33710	AT2G33710	4235	10138	1641	29182	1.11537	2.20355e-09	5.64971e-09
AT3G01970	WRKY45	1648	7921	552	29182	1.234	2.86742e-09	7.29695e-09
AT2G04038	AtbZIP48	2251	3512	361	29182	1.33258	2.97571e-09	7.51642e-09
AT5G64750	ABR1	3045	7775	947	29182	1.16729	3.83348e-09	9.61188e-09
AT5G54230	MYB49	4318	6540	1116	29182	1.15324	4.09075e-09	1.01821e-08
AT3G10113	RVE7L	2673	15664	1573	29182	1.09633	9.45667e-09	2.33676e-08
AT1G36060	ERF055	5884	3127	752	29182	1.1927	1.0635e-08	2.60901e-08
AT4G01280	RVE5	1378	11909	663	29182	1.17897	1.16238e-08	2.83123e-08
AT5G06100	MYB33	1044	14118	594	29182	1.17606	1.20482e-08	2.91378e-08
AT4G14770	TCX2	2773	11284	1209	29182	1.12753	1.41455e-08	3.3969e-08
AT5G03790	ATHB-51	4088	14882	2248	29182	1.0783	1.95e-08	4.65e-08
AT1G64620	DOF1.8	909	15125	552	29182	1.17164	2.5991e-08	6.15482e-08
AT2G27300	NTL8	3707	4907	741	29182	1.18876	3.28446e-08	7.72415e-08
AT1G43160	RAP2-6	3629	5697	831	29182	1.17296	3.91501e-08	9.14395e-08
AT5G52020	ERF025	3773	7033	1043	29182	1.14702	4.06378e-08	9.42687e-08
AT2G23340	ERF008	2511	8044	809	29182	1.16881	4.16142e-08	9.58814e-08
AT5G66700	ATHB-53	2476	9750	949	29182	1.14717	4.44334e-08	1.0169e-07
AT1G34670	AtMYB93	2884	4859	584	29182	1.21615	5.27378e-08	1.19891e-07
AT4G23550	WRKY29	2719	12033	1252	29182	1.1167	5.49328e-08	1.24053e-07
AT5G41570	WRKY24	2879	10009	1117	29182	1.13119	6.00974e-08	1.34824e-07
AT3G10030	AT3G10030	1858	2174	200	29182	1.44491	6.09676e-08	1.35882e-07
AT5G45300	BMY2	1248	2622	168	29182	1.49823	6.33066e-08	1.40179e-07
AT1G55110	IDD7	771	4200	165	29182	1.48695	6.54688e-08	1.44031e-07
AT1G09540	MYB61	3745	11242	1589	29182	1.1014	9.00351e-08	1.96808e-07
AT5G60850	DOF5.4	1270	13802	691	29182	1.1504	1.24403e-07	2.70201e-07
AT3G45610	DOF3.2	1671	14781	948	29182	1.12006	1.66258e-07	3.58823e-07
AT1G35460	BHLH80	1402	4976	312	29182	1.30509	1.67721e-07	3.59704e-07
AT4G26640	WRKY20	1431	2017	150	29182	1.51656	1.84058e-07	3.92274e-07
AT2G02820	MYB88	1396	9266	531	29182	1.19793	2.01475e-07	4.26727e-07
AT4G34410	ERF109	4558	4818	871	29182	1.15742	2.26456e-07	4.76676e-07
AT3G09600	RVE8	5071	13384	2488	29182	1.06976	2.7302e-07	5.71165e-07
AT5G03150	JKD	2203	1965	208	29182	1.40217	3.0674e-07	6.37795e-07
AT5G02460	DOF5.1	1176	17923	803	29182	1.11176	3.44523e-07	7.12015e-07
AT4G32800	ERF043	733	3207	125	29182	1.55175	3.96738e-07	8.14986e-07
AT3G02940	MYB107	3145	7559	931	29182	1.14283	4.07044e-07	8.31149e-07
AT4G28500	NAC073	1384	15520	823	29182	1.11812	8.403e-07	1.70561e-06
AT1G18330	RVE7	1701	18086	1146	29182	1.08706	1.05894e-06	2.13667e-06
AT3G60490	ERF035	2943	7329	846	29182	1.14459	1.24832e-06	2.50398e-06
AT4G00730	ANL2	1000	5649	253	29182	1.30697	1.66059e-06	3.31148e-06
AT1G06180	ATMYB13	3190	2422	335	29182	1.2653	2.10685e-06	4.17099e-06
AT1G01060	LHY	2048	13356	1038	29182	1.1074	2.11607e-06	4.17099e-06
AT1G03800	ERF10	2341	4168	411	29182	1.22921	2.40935e-06	4.72177e-06
AT5G66730	ENY	2289	5126	483	29182	1.20126	3.31042e-06	6.45059e-06
AT1G75080	BZR1	1652	960	89	29182	1.63766	3.40601e-06	6.59915e-06
AT5G66300	NAC105	792	3403	135	29182	1.46171	3.59356e-06	6.92319e-06
AT3G22760	TCX3	2298	10699	943	29182	1.11927	3.73148e-06	7.14851e-06
AT3G06490	MYB108	4161	1909	340	29182	1.24908	4.66164e-06	8.88056e-06
AT1G52150	ATHB-15	844	5388	207	29182	1.32836	5.20665e-06	9.8637e-06
AT3G20770	EIN3	4725	1118	236	29182	1.30372	6.38798e-06	1.20348e-05
AT3G16280	AT3G16280	1843	10192	731	29182	1.13566	6.91761e-06	1.2961e-05
AT5G39610	NAC92	1647	6387	433	29182	1.20119	7.35673e-06	1.37084e-05
AT2G30590	WRKY21	1528	1370	109	29182	1.51949	8.81816e-06	1.63424e-05
AT5G47660	AT5G47660	1278	9003	465	29182	1.17937	8.87974e-06	1.63675e-05
AT1G59640	BPE	979	1651	88	29182	1.5888	1.24873e-05	2.28933e-05
AT5G07310	ERF115	2652	7795	800	29182	1.12932	1.67388e-05	3.0505e-05
AT4G01680	MYB55	1568	8273	518	29182	1.16529	1.6818e-05	3.0505e-05
AT4G24020	NLP7	1885	829	85	29182	1.58733	1.72756e-05	3.11692e-05
AT1G02250	NAC005	2740	6448	692	29182	1.143	1.995e-05	3.5805e-05
AT1G76890	GT-2	1245	8416	424	29182	1.18088	2.44058e-05	4.35726e-05
AT2G30340	LBD13	2966	3210	393	29182	1.20457	3.05487e-05	5.42557e-05
AT5G05550	AT5G05550	1527	8898	536	29182	1.15119	3.97418e-05	7.02175e-05
AT2G46680	ATHB-7	1630	8422	541	29182	1.15003	4.90003e-05	8.61294e-05
AT1G63030	DREB1E	2907	314	54	29182	1.72637	4.98458e-05	8.71663e-05
AT4G05100	AtMYB74	3493	2835	405	29182	1.19349	5.15107e-05	8.96181e-05
AT3G13810	AtIDD11	1010	2987	142	29182	1.37356	5.75311e-05	9.95843e-05
AT2G03340	WRKY3	1357	1216	86	29182	1.5209	7.63723e-05	0.00013153
AT5G25190	ERF003	1072	5021	232	29182	1.25782	8.00589e-05	0.000137186
AT5G52660	RVE6	1466	11443	644	29182	1.12028	8.9325e-05	0.000152299
AT2G44840	ERF13	3645	7829	1072	29182	1.09624	0.000102592	0.000174048
AT1G46768	RAP2-1	3069	1889	248	29182	1.24835	0.00011626	0.000196261
AT4G25480	DREB1A	3069	6745	791	29182	1.1151	0.000138781	0.000233124
AT5G25810	TINY	2782	1602	195	29182	1.27682	0.000200012	0.000334333
AT3G47500	CDF3	768	10960	336	29182	1.16488	0.000212517	0.000353504
AT1G43700	VIP1	1607	1443	111	29182	1.39687	0.00022876	0.000378676
AT1G47655	DOF1.6	1351	6480	352	29182	1.17335	0.000342221	0.000563755
AT3G12730	PHL12	623	8585	222	29182	1.21127	0.000415038	0.000680423
AT2G31230	ERF15	709	11987	335	29182	1.15028	0.000441287	0.000719994
AT5G63090	LOB	3138	1184	163	29182	1.28026	0.000550211	0.000893437
AT2G31220	BHLH10	4271	6890	1093	29182	1.08389	0.000563131	0.000910084
AT1G65910	anac028	3256	6318	777	29182	1.10223	0.000684703	0.00110134
AT4G31060	ERF015	697	4807	147	29182	1.28034	0.000735417	0.00117736
AT5G18560	ERF086	2361	2412	237	29182	1.21448	0.000827294	0.00131826
AT4G25490	DREB1B	3722	9342	1276	29182	1.0709	0.000831609	0.00131897
AT3G53200	MYB27	1992	4828	381	29182	1.15607	0.000872002	0.00137663
AT2G20110	AT2G20110	1412	13568	714	29182	1.08758	0.000922794	0.0014501
AT5G23280	TCP7	1746	842	73	29182	1.44904	0.000978434	0.00153049
AT4G25470	DREB1C	2546	8523	811	29182	1.09065	0.00121578	0.00189306
AT3G49530	NAC062	1789	5243	370	29182	1.15114	0.00130736	0.00202641
AT5G17300	RVE1	2297	17097	1414	29182	1.05071	0.00135423	0.00208956
AT2G38340	DREB2E	3145	9163	1062	29182	1.07543	0.00137574	0.00211319
AT5G39820	ANAC094	2692	705	89	29182	1.36849	0.00150936	0.00230803
AT4G01550	NAC69	919	4298	168	29182	1.2412	0.00152194	0.00231689
AT2G02080	IDD4	430	9357	167	29182	1.21123	0.00165083	0.00250192
AT4G18890	BEH3	1051	787	45	29182	1.58763	0.00168299	0.00253937
AT4G27950	CRF4	3059	1978	247	29182	1.19126	0.00178321	0.00267874
AT5G63260	AT5G63260	1796	11158	745	29182	1.08487	0.0019598	0.00293111
AT1G51140	BHLH122	1025	7995	322	29182	1.14664	0.0020764	0.00309193
AT5G47390	KUA1	3371	12035	1467	29182	1.05521	0.00231572	0.00343331
AT1G14687	ZHD14	268	12176	135	29182	1.20728	0.00251422	0.00371147
AT4G01540	NAC68	2637	11379	1095	29182	1.06492	0.00284175	0.00417688
AT1G02230	NAC004	2289	7245	623	29182	1.09627	0.00336103	0.0049088
AT2G28810	DOF2.2	3619	17774	2279	29182	1.03392	0.0033685	0.0049088
AT5G17800	MYB56	4105	4241	654	29182	1.09625	0.00352317	0.00511235
AT5G19790	RAP2-11	4255	10668	1633	29182	1.04983	0.0040715	0.00588297
AT5G08520	SRM1	1376	7535	398	29182	1.1202	0.0041806	0.00601512
AT1G33240	AT-GTL1	1796	14090	920	29182	1.06093	0.0053827	0.00771219
AT5G51990	DREB1D	3595	13274	1706	29182	1.04326	0.00602548	0.00859703
AT3G11440	ATMYB65	738	8251	239	29182	1.14538	0.00727176	0.010332
AT3G25990	GT-4	1645	2262	154	29182	1.20775	0.00793518	0.0111975
AT1G69570	CDF5	1335	7235	369	29182	1.11486	0.00794662	0.0111975
AT3G61150	HDG1	785	8282	253	29182	1.13561	0.00911592	0.0127426
AT2G02070	IDD5	482	7490	147	29182	1.18824	0.00911787	0.0127426
AT5G65410	ZHD1	680	15259	386	29182	1.08559	0.00992348	0.0138041
AT3G08500	MYB83	3486	11065	1385	29182	1.04782	0.00995838	0.0138041
AT5G47220	ERF2	4611	663	127	29182	1.2123	0.0108972	0.0150443
AT2G01940	SGR5	850	12170	387	29182	1.09173	0.012104	0.0166431
AT1G51700	DOF1.7	784	9240	277	29182	1.11585	0.0145012	0.0198591
AT2G03500	EFM	2074	9700	735	29182	1.06616	0.0148775	0.020293
AT1G06850	AtbZIP52	1993	8914	652	29182	1.07098	0.0160867	0.0218549
AT2G40620	BZIP18	2004	8196	605	29182	1.07491	0.0163993	0.0221911
AT3G24520	HSFC1	4190	6025	916	29182	1.05886	0.0192164	0.0259003
AT5G47230	ERF5	1368	700	45	29182	1.37133	0.0207836	0.0279024
AT4G21080	DOF4.5	1242	14693	660	29182	1.05542	0.0237546	0.0317659
AT5G29000	PHL1	1293	4077	205	29182	1.13483	0.0265758	0.0353998
AT2G22540	SVP	983	12117	438	29182	1.0731	0.0269624	0.035775
AT1G69690	TCP15	628	921	29	29182	1.46317	0.0275881	0.0364634
AT3G26620	LBD23	1624	1361	92	29182	1.21467	0.0307701	0.040512
AT4G04890	PDF2	923	1978	77	29182	1.23077	0.0347356	0.0455571
AT1G49010	AT1G49010	716	13810	363	29182	1.07131	0.0365424	0.0477431
AT1G69180	CRC	1432	7396	392	29182	1.08009	0.038344	0.0499057
AT3G01530	MYB57	2334	9730	817	29182	1.04984	0.0402049	0.0521288
AT4G11660	HSFB2B	2046	3274	254	29182	1.10653	0.0422994	0.0546367
AT1G72010	TCP22	1530	2427	146	29182	1.14738	0.0432665	0.055675
AT1G12630	ERF027	2005	8711	632	29182	1.05597	0.0480938	0.0616541
AT5G66940	DOF5.8	2568	15781	1429	29182	1.02901	0.0494313	0.0631314
AT2G20400	AT2G20400	888	5286	180	29182	1.11904	0.0509257	0.0647972
AT2G42200	SPL9	607	16031	352	29182	1.05562	0.0681641	0.0864087
AT5G62320	MYB99	2515	3665	340	29182	1.07642	0.0693855	0.0876313
AT5G60130	AT5G60130	2448	12890	1116	29182	1.03208	0.0730792	0.0919558
AT5G13910	LEP	3223	501	66	29182	1.19278	0.0744473	0.0933328
AT5G62020	HSFB2A	1715	1103	76	29182	1.17244	0.0840138	0.10494
AT2G41690	HSFB3	3486	1104	147	29182	1.11464	0.0847789	0.10551
AT5G13790	AGL15	3762	2032	282	29182	1.07652	0.0908007	0.112593
AT3G50410	DOF3.4	1860	14784	970	29182	1.02939	0.0961604	0.118509
AT4G36620	GATA19	2146	199	20	29182	1.36667	0.0962667	0.118509
AT3G09735	S1FA3	2227	6577	526	29182	1.04798	0.107078	0.131344
AT5G08130	BIM1	1252	615	33	29182	1.25069	0.111699	0.136521
AT4G37180	HHO5	1644	10041	588	29182	1.03947	0.121858	0.148405
AT5G08330	TCP21	3879	2557	359	29182	1.05623	0.128526	0.155969
AT1G68200	AT1G68200	2748	4363	431	29182	1.04904	0.134971	0.163209
AT5G62470	MYB96	848	1107	38	29182	1.18129	0.164785	0.198558
AT3G11280	AT3G11280	975	1813	68	29182	1.12259	0.174299	0.209281
AT1G30210	TCP24	945	3053	108	29182	1.0924	0.174921	0.209292
AT3G30210	ATMYB121	1901	1853	130	29182	1.07696	0.195315	0.232876
AT1G77200	ERF037	2914	14558	1473	29182	1.01327	0.231484	0.275039
AT3G27010	TCP20	1231	908	43	29182	1.12264	0.236925	0.280526
AT1G13260	RAV1	1693	9335	555	29182	1.02479	0.243367	0.287157
AT4G15090	FAR1	1045	748	29	29182	1.08267	0.35664	0.419359
AT2G42430	LBD16	3466	4846	583	29182	1.01291	0.366671	0.428443
AT2G40260	AT2G40260	603	11638	245	29182	1.01879	0.366878	0.428443
AT3G23220	ERF095	1123	1346	54	29182	1.04252	0.395139	0.459872
AT3G12130	AT3G12130	1909	9636	635	29182	1.00736	0.416504	0.4829
AT2G32460	MYB101	2498	8202	707	29182	1.00698	0.417758	0.4829
AT1G13450	GT-1	1595	418	24	29182	1.05048	0.431625	0.497244
AT1G74840	AT1G74840	3037	7603	795	29182	1.00474	0.442525	0.508085
AT1G19000	AT1G19000	4649	13311	2122	29182	1.00067	0.488119	0.558553
AT4G18880	HSFA4A	1164	717	29	29182	1.01401	0.496369	0.566093
AT3G60580	ZAT9	685	8842	208	29182	1.00216	0.499628	0.567911
AT2G18380	GATA20	1655	12550	711	29182	0.998948	0.525028	0.5948
AT2G36010	E2F3	1174	4911	197	29182	0.99711	0.530775	0.599319
AT5G58900	AT5G58900	1708	13331	779	29182	0.998394	0.534717	0.601777
AT3G60530	GATA4	1576	1361	73	29182	0.99317	0.542483	0.608509
AT1G53230	TCP3	1528	1293	67	29182	0.989619	0.554311	0.619737
AT3G24050	GATA1	2468	934	78	29182	0.987456	0.564786	0.629386
AT1G34370	STOP1	2335	1279	101	29182	0.986913	0.571749	0.63507
AT1G28160	ERF087	875	6804	201	29182	0.985233	0.60983	0.675169
AT2G45420	LBD18	3562	10834	1315	29182	0.994393	0.614796	0.678464
AT2G45410	LBD19	2156	11954	877	29182	0.993008	0.618945	0.680839
AT1G68670	HHO2	4613	7431	1166	29182	0.99262	0.631525	0.692444
AT3G22830	HSFA6B	4220	16790	2415	29182	0.994647	0.675426	0.738206
AT1G31140	AGL63	1861	11483	721	29182	0.984574	0.718182	0.781587
AT5G56840	AT5G56840	2305	14824	1158	29182	0.988979	0.719702	0.781587
AT2G01930	BPC1	1753	11999	707	29182	0.980861	0.762718	0.825673
AT5G16820	HSFA1B	1018	10492	353	29182	0.964459	0.81528	0.877625
AT2G01060	PHL7	1687	11695	659	29182	0.974732	0.815857	0.877625
AT5G14960	E2FD	2259	979	68	29182	0.897274	0.843402	0.904403
AT5G45580	PHL11	4172	16996	2397	29182	0.986489	0.87078	0.930834
AT4G18450	ERF091	2220	537	34	29182	0.832275	0.888752	0.947076
AT3G52440	AT3G52440	2283	15349	1173	29182	0.976848	0.891655	0.94721
AT1G74480	RKD2	2437	7686	616	29182	0.95971	0.897658	0.950625
AT5G05790	AT5G05790	1525	3277	152	29182	0.88759	0.951846	0.999997
AT1G08010	GATA11	1520	2746	124	29182	0.866947	0.963043	0.999997
AT3G24120	AT3G24120	1908	19976	1271	29182	0.973136	0.964654	0.999997
AT2G33550	ASR3	1105	7131	244	29182	0.903633	0.971821	0.999997
AT1G25550	HHO3	1607	8465	433	29182	0.928881	0.972107	0.999997
AT1G49560	HHO6	1667	9713	519	29182	0.935392	0.974609	0.999997
AT5G67580	TRB2	2081	5446	351	29182	0.9038	0.987189	0.999997
AT5G65510	AIL7	4546	2679	377	29182	0.903346	0.989449	0.999997
AT1G51220	WIP5	2319	5129	367	29182	0.900425	0.990878	0.999997
AT2G45480	GRF9	3898	2179	253	29182	0.869234	0.994817	0.999997
AT2G06200	AtGRF6	2558	5295	417	29182	0.898431	0.995153	0.999997
AT5G10510	AIL6	5432	511	73	29182	0.767463	0.996196	0.999997
AT1G06280	LBD2	625	13633	259	29182	0.88704	0.996748	0.999997
AT1G19790	SRS7	4049	8734	1134	29182	0.935766	0.998197	0.999997
AT5G61620	AT5G61620	2146	10442	698	29182	0.908986	0.999539	0.999997
AT4G00250	STKL2	1716	9162	473	29182	0.877948	0.999834	0.999997
AT1G27730	ZAT10	4896	14675	2330	29182	0.946349	0.999984	0.999997
AT1G72740	AT1G72740	1876	12911	743	29182	0.895182	0.999988	0.999997
AT5G04390	AT5G04390	3809	7462	862	29182	0.885026	0.999997	0.999997

## Sheet: S3
Supplemental Table S3. The details of network of leaf senescence
GO ID	GO Term	Rank	Predicted TF	Predict TF symbol	Status	Gene Ratio	Background Ratio	Pvalue	P.adjust(BH)	Number of enriched target genes	Target genes (AGI)
GO:0010150	leaf senescence	1	AT1G36060	TG,WIND3	NOVEL	74/5688	198/30167	7.47e-10	3.42e-08	74	AT1G01680/AT1G02230/AT1G02390/AT1G08050/AT1G09176/AT1G11190/AT1G20180/AT1G20900/AT1G21000/AT1G30700/AT1G31040/AT1G32450/AT1G36622/AT1G54570/AT1G66830/AT1G69490/AT1G73220/AT1G73500/AT1G76680/AT1G76980/AT2G13810/AT2G18690/AT2G22300/AT2G25460/AT2G25625/AT2G30550/AT2G31570/AT2G34610/AT2G35980/AT2G39200/AT2G42540/AT2G43570/AT2G44300/AT2G46950/AT3G05400/AT3G10500/AT3G11340/AT3G14060/AT3G22910/AT3G25010…
GO:0010150	leaf senescence	2	AT1G17950	ATMYB52,BW52,MYB52	NOVEL	56/5301	198/30167	0.000126407	0.00217035	56	AT1G02390/AT1G05620/AT1G09176/AT1G11190/AT1G13990/AT1G18210/AT1G20900/AT1G30700/AT1G31040/AT1G32450/AT1G54570/AT1G73220/AT1G73500/AT1G76680/AT1G76980/AT2G13810/AT2G22300/AT2G25460/AT2G30550/AT2G31570/AT2G34610/AT2G35980/AT2G37750/AT2G44300/AT2G46950/AT3G05400/AT3G10985/AT3G11340/AT3G25010/AT3G25882/AT3G50030/AT3G51130/AT3G54680/AT3G60670/AT4G01870/AT4G02380/AT4G10500/AT4G12735/AT4G15610/AT4G18980…
GO:0010150	leaf senescence	3	AT5G10510	AIL6,PLT3	NOVEL	58/5242	198/30167	2.36e-05	0.000413804	58	AT1G02390/AT1G17020/AT1G20180/AT1G20900/AT1G21000/AT1G30700/AT1G31040/AT1G32450/AT1G54130/AT1G54570/AT1G69490/AT1G73220/AT1G73500/AT1G76680/AT1G76980/AT2G13810/AT2G18690/AT2G22300/AT2G25460/AT2G30550/AT2G31570/AT2G34610/AT2G35980/AT2G37750/AT2G39200/AT2G43000/AT2G44300/AT2G46950/AT3G05400/AT3G11340/AT3G14060/AT3G22910/AT3G25010/AT3G25882/AT3G48080/AT3G56400/AT3G60670/AT4G01870/AT4G02380/AT4G03550…
GO:0010150	leaf senescence	4	AT1G22190	RAP2.4,WIND2	NOVEL	69/5087	198/30167	6.51e-10	2.39e-08	69	AT1G01680/AT1G02390/AT1G08050/AT1G09176/AT1G11190/AT1G21000/AT1G30700/AT1G32450/AT1G36622/AT1G54040/AT1G54570/AT1G66830/AT1G66880/AT1G73220/AT1G73500/AT1G76680/AT1G76980/AT2G13790/AT2G13810/AT2G18690/AT2G22300/AT2G25460/AT2G25625/AT2G30550/AT2G34610/AT2G35980/AT2G39200/AT2G39730/AT2G43570/AT2G44300/AT2G44480/AT2G46950/AT3G05400/AT3G07350/AT3G11340/AT3G14060/AT3G22910/AT3G25010/AT3G25882/AT3G26210…
GO:0010150	leaf senescence	5	AT5G05410	DREB2,DREB2A	NOVEL	67/5009	198/30167	2.39e-09	8.04e-08	67	AT1G02230/AT1G02390/AT1G05620/AT1G11190/AT1G13990/AT1G20180/AT1G30700/AT1G31040/AT1G32450/AT1G54130/AT1G54570/AT1G69490/AT1G73220/AT1G73500/AT1G76680/AT1G76980/AT2G13810/AT2G18690/AT2G22300/AT2G25460/AT2G25625/AT2G31570/AT2G34610/AT2G35980/AT2G37750/AT2G39200/AT2G39730/AT2G42540/AT2G43570/AT2G44300/AT2G44480/AT2G46950/AT3G07350/AT3G10500/AT3G11340/AT3G14060/AT3G22910/AT3G25010/AT3G25882/AT3G26210…
GO:0010150	leaf senescence	6	AT4G25210	AT4G25210	NOVEL	53/4940	198/30167	0.000138361	0.00209882	53	AT1G01680/AT1G02390/AT1G08050/AT1G11190/AT1G21000/AT1G30700/AT1G31040/AT1G32450/AT1G36622/AT1G73220/AT1G73500/AT1G76680/AT1G76980/AT2G13810/AT2G18690/AT2G22300/AT2G30550/AT2G34610/AT2G35980/AT2G37750/AT2G39200/AT2G43000/AT2G44300/AT2G44480/AT2G46950/AT3G05400/AT3G10500/AT3G11340/AT3G25010/AT3G25882/AT3G60670/AT4G01250/AT4G01870/AT4G02380/AT4G12735/AT4G15610/AT4G18980/AT4G23810/AT4G32940/AT4G36040…
GO:0010150	leaf senescence	7	AT3G13960	AtGRF5,GRF5	NOVEL	47/4923	198/30167	0.00436107	0.0390939	47	AT1G02390/AT1G05620/AT1G11190/AT1G20900/AT1G30700/AT1G31040/AT1G32450/AT1G54130/AT1G54570/AT1G73220/AT1G73500/AT1G76680/AT1G76980/AT2G13810/AT2G25460/AT2G34610/AT2G35980/AT2G42540/AT2G44300/AT2G46950/AT3G05400/AT3G11340/AT3G14060/AT3G25882/AT3G54680/AT3G60670/AT4G01870/AT4G02380/AT4G10500/AT4G12735/AT4G15610/AT4G22750/AT4G23810/AT4G32940/AT5G03280/AT5G23950/AT5G24530/AT5G25930/AT5G35110/AT5G37600…
GO:0010150	leaf senescence	8	AT5G15830	AtbZIP3,bZIP3	NOVEL	47/4912	198/30167	0.00417648	0.0429394	47	AT1G01680/AT1G09176/AT1G11190/AT1G20180/AT1G20900/AT1G21000/AT1G31040/AT1G32450/AT1G73220/AT1G73500/AT1G76680/AT1G76980/AT2G13810/AT2G25460/AT2G25625/AT2G34610/AT2G35980/AT2G44300/AT2G44480/AT2G46700/AT2G46950/AT3G05400/AT3G10985/AT3G11340/AT3G14060/AT3G25010/AT3G25882/AT3G60670/AT4G01870/AT4G02380/AT4G10500/AT4G12735/AT4G15610/AT4G18980/AT4G32940/AT4G36040/AT5G23950/AT5G24110/AT5G25930/AT5G35110…
GO:0010150	leaf senescence	9	AT3G09600	LCL5,RVE8	NOVEL	74/4918	198/30167	6.28e-13	3.72e-11	74	AT1G01680/AT1G02390/AT1G09176/AT1G11190/AT1G21000/AT1G30700/AT1G31040/AT1G32450/AT1G34420/AT1G36622/AT1G54040/AT1G54130/AT1G66830/AT1G66880/AT1G69490/AT1G73220/AT1G76680/AT1G76980/AT1G79520/AT2G13790/AT2G13810/AT2G18690/AT2G22300/AT2G25460/AT2G25625/AT2G30550/AT2G34610/AT2G35980/AT2G37750/AT2G39200/AT2G39730/AT2G43000/AT2G43570/AT2G44300/AT2G44480/AT2G46950/AT3G05400/AT3G10500/AT3G11340/AT3G14060…
GO:0010150	leaf senescence	10	AT3G61250	AtMYB17,LMI2,MYB17	NOVEL	47/4871	198/30167	0.00354674	0.0307991	47	AT1G02390/AT1G05620/AT1G09176/AT1G11190/AT1G18210/AT1G20900/AT1G30700/AT1G31040/AT1G32450/AT1G54570/AT1G73220/AT1G76680/AT1G76980/AT2G25460/AT2G34610/AT2G35980/AT2G44300/AT2G44480/AT2G46950/AT3G05400/AT3G07350/AT3G10500/AT3G10985/AT3G11340/AT3G14060/AT3G50760/AT3G54680/AT3G60670/AT4G01870/AT4G02380/AT4G12735/AT4G15610/AT4G18980/AT4G23810/AT4G32940/AT4G36040/AT5G24530/AT5G25930/AT5G35110/AT5G39050…
GO:0010150	leaf senescence	11	AT2G31370	AtbZIP59,PosF21	NOVEL	58/4880	198/30167	2.55e-06	5.91e-05	58	AT1G02390/AT1G05620/AT1G08050/AT1G11190/AT1G20180/AT1G21000/AT1G30700/AT1G31040/AT1G32450/AT1G36622/AT1G54130/AT1G54570/AT1G66880/AT1G69490/AT1G73220/AT1G73500/AT1G76680/AT1G76980/AT2G13810/AT2G18690/AT2G25460/AT2G30550/AT2G31570/AT2G34610/AT2G35980/AT2G39200/AT2G44300/AT2G44480/AT2G46700/AT2G46950/AT3G05400/AT3G10500/AT3G11340/AT3G60670/AT4G01250/AT4G01870/AT4G02380/AT4G03550/AT4G10500/AT4G12735…
GO:0010150	leaf senescence	12	AT3G46600	AT3G46600	NOVEL	80/4835	198/30167	1.68e-16	9.72e-15	80	AT1G01680/AT1G02390/AT1G09176/AT1G11190/AT1G13990/AT1G21000/AT1G30700/AT1G31040/AT1G32450/AT1G34420/AT1G36622/AT1G54130/AT1G66830/AT1G66880/AT1G68620/AT1G73220/AT1G73500/AT1G76680/AT1G76980/AT2G13790/AT2G13810/AT2G18690/AT2G22300/AT2G25460/AT2G25625/AT2G30550/AT2G31570/AT2G34610/AT2G35980/AT2G39200/AT2G39730/AT2G42540/AT2G43000/AT2G43570/AT2G44300/AT2G44480/AT2G46950/AT3G05400/AT3G07350/AT3G11340…
GO:0010150	leaf senescence	13	AT2G34710	ATHB-14,ATHB14,PHB,PHB-1D	NOVEL	49/4735	198/30167	0.000625024	0.00920744	49	AT1G01680/AT1G02390/AT1G09176/AT1G09500/AT1G11190/AT1G20180/AT1G20900/AT1G30700/AT1G31040/AT1G32450/AT1G36622/AT1G54570/AT1G73220/AT1G73500/AT1G76680/AT2G13810/AT2G22300/AT2G25460/AT2G34610/AT2G44300/AT2G44480/AT2G46950/AT3G05400/AT3G11340/AT3G22910/AT3G25010/AT3G25882/AT3G56400/AT3G56860/AT3G60670/AT4G01870/AT4G02380/AT4G10500/AT4G12735/AT4G18980/AT4G23810/AT4G32940/AT5G03280/AT5G23950/AT5G24110…
GO:0010150	leaf senescence	14	AT1G27730	STZ,ZAT10	NOVEL	69/4763	198/30167	3.39e-11	1.49e-09	69	AT1G01680/AT1G02390/AT1G11190/AT1G13990/AT1G21000/AT1G30700/AT1G31040/AT1G32450/AT1G34420/AT1G36622/AT1G66830/AT1G66880/AT1G69490/AT1G73220/AT1G73500/AT1G76680/AT1G76980/AT2G13790/AT2G13810/AT2G18690/AT2G22300/AT2G25460/AT2G25625/AT2G30550/AT2G31570/AT2G35980/AT2G39200/AT2G39730/AT2G42540/AT2G43000/AT2G43570/AT2G44300/AT2G44480/AT2G46950/AT3G05400/AT3G14060/AT3G22910/AT3G25010/AT3G25882/AT3G26210…
GO:0010150	leaf senescence	15	AT4G29930	AT4G29930	NOVEL	62/4642	198/30167	1.35e-08	5.57e-07	62	AT1G02390/AT1G05620/AT1G09176/AT1G11190/AT1G20180/AT1G21000/AT1G30700/AT1G31040/AT1G32450/AT1G36622/AT1G54570/AT1G68620/AT1G73220/AT1G73500/AT1G76680/AT1G76980/AT2G13810/AT2G18690/AT2G25460/AT2G25625/AT2G31570/AT2G34610/AT2G35980/AT2G37750/AT2G39200/AT2G39730/AT2G43000/AT2G44300/AT2G44480/AT2G46950/AT3G05400/AT3G07350/AT3G10985/AT3G11340/AT3G14060/AT3G15534/AT3G25010/AT3G25882/AT3G56400/AT3G60670…
GO:0010150	leaf senescence	16	AT5G59570	BOA	NOVEL	65/4618	198/30167	5.73e-10	2.44e-08	65	AT1G02390/AT1G11190/AT1G20900/AT1G21000/AT1G30700/AT1G31040/AT1G32450/AT1G54570/AT1G69490/AT1G73220/AT1G73500/AT1G76680/AT1G76980/AT2G13810/AT2G18690/AT2G22300/AT2G25460/AT2G25625/AT2G30550/AT2G31570/AT2G34610/AT2G35980/AT2G37750/AT2G39200/AT2G39730/AT2G44300/AT2G44480/AT2G46950/AT3G05400/AT3G07350/AT3G11340/AT3G14060/AT3G22910/AT3G25882/AT3G50760/AT3G52430/AT3G56400/AT3G60670/AT4G01870/AT4G02380…
GO:0010150	leaf senescence	17	AT4G32010	HSI2-L1,HSL1,VAL2	NOVEL	60/4614	198/30167	6.85e-08	2.26e-06	60	AT1G01680/AT1G02390/AT1G08050/AT1G11190/AT1G13990/AT1G20180/AT1G20900/AT1G21000/AT1G30700/AT1G32450/AT1G34420/AT1G36622/AT1G54040/AT1G66880/AT1G73220/AT1G73500/AT1G76680/AT1G76980/AT2G13790/AT2G13810/AT2G18690/AT2G25460/AT2G30550/AT2G31570/AT2G34610/AT2G35980/AT2G39200/AT2G43000/AT2G44300/AT2G44480/AT2G46950/AT3G05400/AT3G10500/AT3G10985/AT3G11340/AT3G19190/AT3G22910/AT3G25010/AT3G50760/AT3G60670…
GO:0010150	leaf senescence	18	AT1G32360	AT1G32360	NOVEL	65/4609	198/30167	5.28e-10	2.18e-08	65	AT1G01680/AT1G02390/AT1G08050/AT1G11190/AT1G13990/AT1G21000/AT1G30700/AT1G32450/AT1G36622/AT1G66830/AT1G66880/AT1G69490/AT1G73220/AT1G73500/AT1G73680/AT1G76680/AT1G76980/AT2G02710/AT2G13790/AT2G13810/AT2G18690/AT2G22300/AT2G25460/AT2G25625/AT2G30550/AT2G31570/AT2G34610/AT2G35980/AT2G39200/AT2G44300/AT2G44480/AT2G46700/AT2G46950/AT3G05400/AT3G07350/AT3G11340/AT3G14067/AT3G19190/AT3G25010/AT3G52430…
GO:0010150	leaf senescence	19	AT5G67420	ASL39,LBD37	NOVEL	61/4574	198/30167	1.97e-08	7.55e-07	61	AT1G01680/AT1G02390/AT1G08050/AT1G09176/AT1G11190/AT1G21000/AT1G30700/AT1G31040/AT1G32450/AT1G34420/AT1G36622/AT1G54040/AT1G54130/AT1G54570/AT1G66830/AT1G73220/AT1G73500/AT1G76680/AT1G76980/AT2G13810/AT2G18690/AT2G22300/AT2G25460/AT2G25625/AT2G30550/AT2G31570/AT2G34610/AT2G35980/AT2G37750/AT2G39200/AT2G43000/AT2G44300/AT2G44480/AT2G46700/AT2G46950/AT3G05400/AT3G11340/AT3G14060/AT3G25010/AT3G25882…
GO:0010150	leaf senescence	20	AT3G20770	AtEIN3,EIN3	NOVEL	78/4594	198/30167	1.16e-16	7.11e-15	78	AT1G01680/AT1G02230/AT1G02390/AT1G08050/AT1G09176/AT1G11190/AT1G13990/AT1G20900/AT1G21000/AT1G30700/AT1G31040/AT1G32450/AT1G34420/AT1G36622/AT1G54130/AT1G54570/AT1G66830/AT1G66880/AT1G69490/AT1G73220/AT1G73500/AT1G76980/AT2G13790/AT2G13810/AT2G18690/AT2G22300/AT2G25460/AT2G25625/AT2G30550/AT2G31570/AT2G34610/AT2G35980/AT2G37750/AT2G39200/AT2G42540/AT2G43000/AT2G43570/AT2G44300/AT2G46950/AT3G05400…
GO:0010150	leaf senescence	21	AT1G49480	RTV1	NOVEL	52/4533	198/30167	2.79e-05	0.000520091	52	AT1G01680/AT1G02390/AT1G05620/AT1G08050/AT1G21000/AT1G30700/AT1G31040/AT1G32450/AT1G36622/AT1G54040/AT1G73220/AT1G73500/AT1G76680/AT1G76980/AT2G13810/AT2G30550/AT2G31570/AT2G31690/AT2G34610/AT2G35980/AT2G37750/AT2G39200/AT2G39730/AT2G44300/AT2G44480/AT2G46700/AT2G46950/AT3G05400/AT3G11340/AT3G25010/AT3G25882/AT3G60670/AT4G01870/AT4G02380/AT4G10500/AT4G12735/AT4G15610/AT4G18980/AT4G30490/AT4G32940…
GO:0010150	leaf senescence	22	AT3G15170	ANAC054,ATNAC1,CUC1	NOVEL	49/4499	198/30167	0.00018801	0.00354209	49	AT1G01680/AT1G02390/AT1G05620/AT1G11190/AT1G17020/AT1G20180/AT1G20900/AT1G30700/AT1G31040/AT1G32450/AT1G54130/AT1G54570/AT1G73220/AT1G73500/AT1G76680/AT1G76980/AT2G13810/AT2G22300/AT2G25460/AT2G34610/AT2G35980/AT2G39730/AT2G42540/AT2G43000/AT2G44300/AT2G46950/AT3G05400/AT3G11340/AT3G25882/AT3G60670/AT4G01870/AT4G02380/AT4G10500/AT4G12735/AT4G15610/AT4G22750/AT4G32940/AT5G23950/AT5G24110/AT5G24530…
GO:0010150	leaf senescence	23	AT5G51780	AT5G51780	NOVEL	60/4512	198/30167	3.03e-08	1.06e-06	60	AT1G02390/AT1G05620/AT1G11190/AT1G20900/AT1G30700/AT1G31040/AT1G32450/AT1G36622/AT1G54570/AT1G69490/AT1G73220/AT1G73500/AT1G76680/AT1G76980/AT2G13810/AT2G25460/AT2G25625/AT2G31570/AT2G34610/AT2G35980/AT2G37750/AT2G39200/AT2G42540/AT2G43000/AT2G44300/AT2G44480/AT2G46950/AT3G05400/AT3G07350/AT3G10500/AT3G11340/AT3G14060/AT3G14067/AT3G22910/AT3G48020/AT3G50030/AT3G56400/AT3G60670/AT4G01870/AT4G02380…
GO:0010150	leaf senescence	24	AT1G19000	AT1G19000	NOVEL	72/4511	198/30167	8.07e-14	5.64e-12	72	AT1G01680/AT1G02230/AT1G02390/AT1G09176/AT1G11190/AT1G13990/AT1G21000/AT1G30700/AT1G31040/AT1G32450/AT1G36622/AT1G54040/AT1G54130/AT1G66880/AT1G68620/AT1G69490/AT1G73220/AT1G73500/AT1G76680/AT2G13790/AT2G13810/AT2G18690/AT2G25460/AT2G25625/AT2G30550/AT2G31570/AT2G34610/AT2G35980/AT2G37750/AT2G39200/AT2G39730/AT2G43000/AT2G43570/AT2G44300/AT2G44480/AT2G46950/AT3G05400/AT3G07350/AT3G14060/AT3G14067…
GO:0010150	leaf senescence	25	AT1G04990	AT1G04990	NOVEL	48/4488	198/30167	0.000341821	0.00402265	48	AT1G01680/AT1G02390/AT1G05620/AT1G08050/AT1G09176/AT1G11190/AT1G20180/AT1G30700/AT1G32450/AT1G54570/AT1G73220/AT1G73500/AT1G76680/AT2G13810/AT2G25460/AT2G30550/AT2G31570/AT2G34610/AT2G35980/AT2G37750/AT2G39200/AT2G44300/AT2G46950/AT3G05400/AT3G11340/AT3G14060/AT3G25010/AT3G25882/AT3G43230/AT3G60670/AT4G01870/AT4G02380/AT4G10500/AT4G12735/AT4G15610/AT4G18980/AT4G23810/AT4G32940/AT4G36040/AT5G24110…
GO:0010150	leaf senescence	26	AT5G13080	ATWRKY75,WRKY75	NOVEL	68/4489	198/30167	6.62e-12	3.6e-10	68	AT1G02390/AT1G08050/AT1G11190/AT1G18210/AT1G20900/AT1G21000/AT1G30700/AT1G31040/AT1G32450/AT1G54570/AT1G66830/AT1G68620/AT1G69490/AT1G73220/AT1G73500/AT1G76680/AT1G76980/AT2G13810/AT2G18690/AT2G25460/AT2G25625/AT2G30550/AT2G31570/AT2G34610/AT2G35980/AT2G37750/AT2G39200/AT2G43000/AT2G44300/AT2G44480/AT2G46950/AT3G05400/AT3G07350/AT3G10500/AT3G10985/AT3G11340/AT3G14060/AT3G22910/AT3G25010/AT3G25882…
GO:0010150	leaf senescence	27	AT1G68670	HHO2,NIGT1.2	NOVEL	60/4463	198/30167	2.02e-08	7.22e-07	60	AT1G01680/AT1G02390/AT1G08050/AT1G09176/AT1G11190/AT1G21000/AT1G30700/AT1G31040/AT1G32450/AT1G36622/AT1G54130/AT1G54570/AT1G69490/AT1G73220/AT1G73500/AT1G76680/AT1G76980/AT2G13810/AT2G25460/AT2G25625/AT2G30550/AT2G31570/AT2G34610/AT2G35980/AT2G39200/AT2G39730/AT2G43000/AT2G44300/AT2G44480/AT2G46950/AT3G05400/AT3G07350/AT3G11340/AT3G14060/AT3G25010/AT3G25882/AT3G43230/AT3G60670/AT4G01870/AT4G02380…
GO:0010150	leaf senescence	28	AT5G47220	ATERF-2,ATERF2,ERF2	NOVEL	71/4474	198/30167	1.76e-13	8.66e-12	71	AT1G01680/AT1G02390/AT1G09176/AT1G11190/AT1G13990/AT1G21000/AT1G30700/AT1G32450/AT1G34420/AT1G36622/AT1G54040/AT1G66830/AT1G66880/AT1G69490/AT1G73220/AT1G73500/AT1G76680/AT1G76980/AT2G13790/AT2G13810/AT2G18690/AT2G22300/AT2G25460/AT2G25625/AT2G30550/AT2G31570/AT2G34610/AT2G35980/AT2G39200/AT2G39730/AT2G42540/AT2G43000/AT2G44300/AT2G44480/AT2G46950/AT3G05400/AT3G11340/AT3G14060/AT3G22910/AT3G25010…
GO:0010150	leaf senescence	29	AT3G56970	BHLH038,bHLH38,ORG2	NOVEL	43/4449	198/30167	0.0052919	0.0420815	43	AT1G05620/AT1G09176/AT1G09500/AT1G11190/AT1G18210/AT1G30700/AT1G31040/AT1G32450/AT1G54570/AT1G73220/AT1G73500/AT1G76680/AT2G13810/AT2G25460/AT2G34610/AT2G44300/AT2G46950/AT3G05400/AT3G07350/AT3G10985/AT3G11340/AT3G14060/AT3G25882/AT3G54680/AT3G56400/AT3G60670/AT4G01870/AT4G02380/AT4G12735/AT4G15610/AT4G32940/AT4G36040/AT5G24530/AT5G25930/AT5G39050/AT5G44160/AT5G44610/AT5G52310/AT5G56870/AT5G62165…
GO:0010150	leaf senescence	30	AT4G34410	ERF109,RRTF1	NOVEL	73/4430	198/30167	9.31e-15	5.05e-13	73	AT1G01680/AT1G02390/AT1G08050/AT1G11190/AT1G13990/AT1G21000/AT1G30700/AT1G32450/AT1G34420/AT1G36622/AT1G54040/AT1G66830/AT1G66880/AT1G69490/AT1G73220/AT1G73500/AT1G76680/AT1G76980/AT2G13810/AT2G18690/AT2G25460/AT2G25625/AT2G30550/AT2G31570/AT2G34610/AT2G35980/AT2G39200/AT2G43000/AT2G43570/AT2G44300/AT2G44480/AT2G46950/AT3G05400/AT3G14067/AT3G22910/AT3G25010/AT3G25882/AT3G26210/AT3G27110/AT3G28100…
GO:0010150	leaf senescence	31	AT1G73410	ATMYB54,MYB54	NOVEL	46/4399	198/30167	0.000769797	0.0115469	46	AT1G02390/AT1G05620/AT1G11190/AT1G18210/AT1G20900/AT1G30700/AT1G31040/AT1G32450/AT1G36622/AT1G54570/AT1G73220/AT1G73500/AT1G76680/AT1G76980/AT2G13810/AT2G25460/AT2G30550/AT2G31570/AT2G34610/AT2G37750/AT2G44300/AT2G46950/AT3G05400/AT3G10985/AT3G11340/AT3G14060/AT3G51130/AT3G54680/AT3G60670/AT4G01870/AT4G02380/AT4G12735/AT4G15610/AT4G23810/AT4G32940/AT4G36040/AT5G23950/AT5G24530/AT5G25930/AT5G35110…
GO:0010150	leaf senescence	32	AT5G65510	AIL7,PLT7	NOVEL	46/4377	198/30167	0.000690918	0.0108429	46	AT1G02390/AT1G05620/AT1G09176/AT1G11190/AT1G20180/AT1G20900/AT1G30700/AT1G31040/AT1G32450/AT1G36622/AT1G54570/AT1G73220/AT1G73500/AT1G76680/AT1G76980/AT2G13810/AT2G25460/AT2G34610/AT2G35980/AT2G46950/AT3G05400/AT3G11340/AT3G14060/AT3G22910/AT3G25010/AT3G60670/AT4G01870/AT4G02380/AT4G10500/AT4G12735/AT4G15610/AT4G18980/AT4G23810/AT4G36040/AT5G23950/AT5G24110/AT5G24530/AT5G25930/AT5G35110/AT5G37600…
GO:0010150	leaf senescence	33	AT4G34000	ABF3,AtABF3,DPBF5	NOVEL	60/4378	198/30167	9.86e-09	4.99e-07	60	AT1G01680/AT1G02390/AT1G08050/AT1G11190/AT1G20180/AT1G21000/AT1G30700/AT1G32450/AT1G36622/AT1G54130/AT1G54570/AT1G66830/AT1G73220/AT1G73500/AT1G76680/AT1G76980/AT2G13810/AT2G22300/AT2G25460/AT2G25625/AT2G30550/AT2G31570/AT2G34610/AT2G35980/AT2G39200/AT2G39730/AT2G44300/AT2G44480/AT2G46700/AT2G46950/AT3G05400/AT3G11340/AT3G14060/AT3G14067/AT3G25010/AT3G25882/AT3G43230/AT3G56400/AT3G60670/AT4G01250…
GO:0010150	leaf senescence	34	AT4G31650	AT4G31650	NOVEL	53/4369	198/30167	4.52e-06	0.000146162	53	AT1G01680/AT1G02390/AT1G05620/AT1G11190/AT1G20180/AT1G30700/AT1G31040/AT1G32450/AT1G36622/AT1G54130/AT1G54570/AT1G66830/AT1G73220/AT1G76680/AT2G13790/AT2G13810/AT2G18690/AT2G22300/AT2G25625/AT2G31570/AT2G34610/AT2G35980/AT2G39200/AT2G43570/AT2G44300/AT2G44480/AT2G46950/AT3G05400/AT3G10985/AT3G11340/AT3G14060/AT3G22910/AT3G25010/AT3G25882/AT3G29035/AT3G60670/AT4G01870/AT4G02380/AT4G10500/AT4G12735…
GO:0010150	leaf senescence	35	AT2G43010	AtPIF4,PIF4,SRL2	NOVEL	71/4370	198/30167	5.41e-14	3.71e-12	71	AT1G01680/AT1G02390/AT1G09176/AT1G11190/AT1G13990/AT1G20180/AT1G21000/AT1G30700/AT1G31040/AT1G32450/AT1G34420/AT1G36622/AT1G54130/AT1G66830/AT1G66880/AT1G69490/AT1G73220/AT1G73500/AT1G76680/AT1G79520/AT2G02710/AT2G13800/AT2G13810/AT2G18690/AT2G22300/AT2G25460/AT2G25625/AT2G30550/AT2G31570/AT2G34610/AT2G35980/AT2G37750/AT2G44480/AT2G46950/AT3G07350/AT3G14067/AT3G15534/AT3G22910/AT3G25010/AT3G25882…
GO:0010150	leaf senescence	36	AT5G60450	ARF4	NOVEL	48/4339	198/30167	0.000153834	0.00326652	48	AT1G01680/AT1G08050/AT1G09176/AT1G11190/AT1G20180/AT1G21000/AT1G30700/AT1G32450/AT1G54040/AT1G54570/AT1G73220/AT1G73500/AT1G76680/AT1G76980/AT2G13810/AT2G18690/AT2G22300/AT2G34610/AT2G35980/AT2G39200/AT2G44300/AT2G44480/AT2G46950/AT3G05400/AT3G10500/AT3G10985/AT3G11340/AT3G22910/AT3G25010/AT3G25882/AT3G56860/AT3G60670/AT4G01870/AT4G02380/AT4G03550/AT4G10500/AT4G18980/AT4G32940/AT4G36040/AT5G24110…
GO:0010150	leaf senescence	37	AT5G15150	ATHB-3,ATHB3,HAT7,HB-3	NOVEL	59/4341	198/30167	1.88e-08	6.59e-07	59	AT1G02390/AT1G05620/AT1G11190/AT1G17020/AT1G20900/AT1G30700/AT1G31040/AT1G32450/AT1G36622/AT1G54570/AT1G66830/AT1G73220/AT1G73500/AT1G76680/AT1G76980/AT2G13810/AT2G18690/AT2G25460/AT2G34610/AT2G35980/AT2G37750/AT2G39200/AT2G43000/AT2G44300/AT2G46950/AT3G05400/AT3G10500/AT3G11340/AT3G14060/AT3G22910/AT3G25010/AT3G25882/AT3G29035/AT3G56400/AT3G56860/AT3G60670/AT4G01870/AT4G02380/AT4G10500/AT4G12735…
GO:0010150	leaf senescence	38	AT5G13180	ANAC083,NAC083,VNI2	KNOWN	70/4337	198/30167	1.24e-13	1e-11	70	AT1G01680/AT1G02390/AT1G08050/AT1G09176/AT1G11190/AT1G21000/AT1G30700/AT1G32450/AT1G34420/AT1G36622/AT1G54130/AT1G54570/AT1G66830/AT1G66880/AT1G69490/AT1G73220/AT1G73500/AT1G76680/AT1G76980/AT2G13790/AT2G13810/AT2G18690/AT2G22300/AT2G25460/AT2G25625/AT2G30550/AT2G31570/AT2G34610/AT2G35980/AT2G37750/AT2G39200/AT2G43000/AT2G44300/AT2G44480/AT2G46950/AT3G05400/AT3G07350/AT3G11340/AT3G14067/AT3G25010…
GO:0010150	leaf senescence	39	AT2G42150	AT2G42150	NOVEL	46/4275	198/30167	0.000411738	0.00570053	46	AT1G02390/AT1G09176/AT1G09500/AT1G11190/AT1G18210/AT1G21000/AT1G30700/AT1G31040/AT1G32450/AT1G54570/AT1G69490/AT1G73220/AT1G73500/AT1G76680/AT1G76980/AT2G25460/AT2G25625/AT2G34610/AT2G39200/AT2G39730/AT2G44300/AT2G46950/AT3G05400/AT3G10985/AT3G11340/AT3G22910/AT3G25010/AT3G25882/AT3G54680/AT4G01250/AT4G01870/AT4G02380/AT4G10500/AT4G12735/AT4G15610/AT4G32940/AT4G36040/AT5G24530/AT5G25930/AT5G37600…
GO:0010150	leaf senescence	40	AT3G01220	ATHB20,HB20	NOVEL	54/4264	198/30167	9.41e-07	2.25e-05	54	AT1G02390/AT1G05620/AT1G11190/AT1G17020/AT1G20900/AT1G30700/AT1G31040/AT1G32450/AT1G36622/AT1G54130/AT1G54570/AT1G69490/AT1G73220/AT1G73500/AT1G76680/AT1G76980/AT2G13810/AT2G25460/AT2G25625/AT2G31570/AT2G34610/AT2G35980/AT2G37750/AT2G39200/AT2G42540/AT2G43000/AT2G44300/AT2G46950/AT3G05400/AT3G11340/AT3G14060/AT3G22910/AT3G25010/AT3G25882/AT3G56400/AT3G60670/AT4G01870/AT4G02380/AT4G12735/AT4G15610…
GO:0010150	leaf senescence	41	AT5G26660	ATMYB86,MYB86	NOVEL	46/4252	198/30167	0.000364983	0.00445279	46	AT1G05620/AT1G17020/AT1G20900/AT1G30700/AT1G31040/AT1G32450/AT1G36622/AT1G54570/AT1G73220/AT1G73500/AT1G76680/AT1G76980/AT2G13810/AT2G18690/AT2G25460/AT2G25625/AT2G34610/AT2G37750/AT2G39200/AT2G39730/AT2G43000/AT2G44300/AT2G46950/AT3G05400/AT3G11340/AT3G14060/AT3G25010/AT3G56400/AT3G60670/AT4G01870/AT4G02380/AT4G10500/AT4G15610/AT4G32940/AT4G36040/AT5G24530/AT5G25930/AT5G35110/AT5G39050/AT5G44160…
GO:0010150	leaf senescence	42	AT5G14000	anac084,NAC084	NOVEL	48/4249	198/30167	9.23e-05	0.00126294	48	AT1G02390/AT1G05620/AT1G20900/AT1G30700/AT1G31040/AT1G32450/AT1G54570/AT1G69490/AT1G73220/AT1G73500/AT1G76680/AT1G76980/AT2G13810/AT2G18690/AT2G25460/AT2G31570/AT2G34610/AT2G37750/AT2G39200/AT2G42540/AT2G44300/AT2G44480/AT2G46950/AT3G05400/AT3G10500/AT3G11340/AT3G14060/AT3G48020/AT3G60670/AT4G01870/AT4G02380/AT4G10500/AT4G12735/AT4G15610/AT4G18980/AT4G23810/AT4G32940/AT5G23950/AT5G24110/AT5G24530…
GO:0010150	leaf senescence	43	AT2G22430	ATHB6,HB6	NOVEL	66/4264	198/30167	6e-12	3.05e-10	66	AT1G01680/AT1G02390/AT1G09176/AT1G11190/AT1G13990/AT1G17020/AT1G21000/AT1G30700/AT1G31040/AT1G32450/AT1G34420/AT1G36622/AT1G54130/AT1G54570/AT1G66830/AT1G66880/AT1G69490/AT1G73220/AT1G73500/AT1G76980/AT2G13810/AT2G22300/AT2G25460/AT2G25625/AT2G30550/AT2G31570/AT2G34610/AT2G35980/AT2G37750/AT2G39200/AT2G42540/AT2G43000/AT2G44300/AT2G46950/AT3G07350/AT3G10500/AT3G11340/AT3G25010/AT3G25882/AT3G43230…
GO:0010150	leaf senescence	44	AT5G67060	HEC1	NOVEL	43/4242	198/30167	0.00219056	0.0232482	43	AT1G05620/AT1G11190/AT1G30700/AT1G31040/AT1G32450/AT1G36622/AT1G54130/AT1G54570/AT1G73220/AT1G73500/AT1G76680/AT1G76980/AT2G13810/AT2G25460/AT2G34610/AT2G35980/AT2G44300/AT2G46950/AT3G05400/AT3G11340/AT3G25882/AT3G54680/AT3G56400/AT3G60670/AT4G01870/AT4G02380/AT4G10500/AT4G12735/AT4G15610/AT4G18980/AT4G23810/AT4G32940/AT5G24110/AT5G24530/AT5G25930/AT5G39050/AT5G44160/AT5G44610/AT5G52300/AT5G52310…
GO:0010150	leaf senescence	45	AT3G28910	ATMYB30,MYB30	NOVEL	47/4218	198/30167	0.000155127	0.00237694	47	AT1G01680/AT1G02390/AT1G30700/AT1G32450/AT1G36622/AT1G73220/AT1G73500/AT1G76680/AT1G76980/AT2G13810/AT2G22300/AT2G25460/AT2G25625/AT2G31570/AT2G34610/AT2G35980/AT2G37750/AT2G39200/AT2G43000/AT2G44300/AT2G46950/AT3G05400/AT3G11340/AT3G14060/AT3G22910/AT3G25010/AT3G25882/AT3G56400/AT3G60670/AT4G01870/AT4G02380/AT4G10500/AT4G12735/AT4G15610/AT4G18980/AT4G23810/AT4G30490/AT4G32940/AT5G24110/AT5G24530…
GO:0010150	leaf senescence	46	AT4G02670	AtIDD12,IDD12	NOVEL	54/4223	198/30167	6.94e-07	2.98e-05	54	AT1G01680/AT1G02390/AT1G05620/AT1G11190/AT1G20180/AT1G30700/AT1G31040/AT1G32450/AT1G54130/AT1G54570/AT1G73220/AT1G76680/AT2G13810/AT2G18690/AT2G22300/AT2G25460/AT2G34610/AT2G35980/AT2G37750/AT2G39730/AT2G43570/AT2G44300/AT2G44480/AT2G46950/AT3G05400/AT3G11340/AT3G14060/AT3G25010/AT3G25882/AT3G50760/AT3G56400/AT3G56860/AT3G60670/AT4G01870/AT4G02380/AT4G10500/AT4G12735/AT4G15610/AT4G18980/AT4G23810…
GO:0010150	leaf senescence	47	AT2G01430	ATHB-17,ATHB17,HB17	NOVEL	46/4218	198/30167	0.00030461	0.00448607	46	AT1G02390/AT1G05620/AT1G09176/AT1G11190/AT1G18210/AT1G20900/AT1G30700/AT1G31040/AT1G32450/AT1G54570/AT1G73220/AT1G73500/AT1G76680/AT1G76980/AT2G13810/AT2G25460/AT2G31570/AT2G34610/AT2G37750/AT2G44300/AT2G46950/AT3G05400/AT3G07350/AT3G10985/AT3G11340/AT3G14060/AT3G60670/AT4G01870/AT4G02380/AT4G10500/AT4G12735/AT4G15610/AT4G23810/AT4G32940/AT4G36040/AT5G23950/AT5G24530/AT5G25930/AT5G35110/AT5G39050…
GO:0010150	leaf senescence	48	AT5G49330	ATMYB111,MYB111,PFG3	NOVEL	46/4184	198/30167	0.000253415	0.00457068	46	AT1G02390/AT1G05620/AT1G11190/AT1G20900/AT1G30700/AT1G31040/AT1G32450/AT1G53230/AT1G54570/AT1G73220/AT1G76680/AT1G76980/AT2G13810/AT2G22300/AT2G25460/AT2G34610/AT2G35980/AT2G44300/AT2G44480/AT2G46950/AT3G05400/AT3G10500/AT3G11340/AT3G22910/AT3G25010/AT3G25882/AT3G50760/AT3G56400/AT3G60670/AT4G01870/AT4G02380/AT4G12735/AT4G15610/AT4G23810/AT5G25930/AT5G35110/AT5G44160/AT5G44610/AT5G47390/AT5G52300…
GO:0010150	leaf senescence	49	AT4G36870	BLH2,SAW1	NOVEL	66/4192	198/30167	2.76e-12	1.7e-10	66	AT1G01680/AT1G02390/AT1G08050/AT1G09176/AT1G13990/AT1G21000/AT1G32450/AT1G34420/AT1G36622/AT1G54040/AT1G54130/AT1G54570/AT1G66830/AT1G66880/AT1G69490/AT1G73220/AT1G73500/AT1G76680/AT1G76980/AT2G13790/AT2G13810/AT2G18690/AT2G22300/AT2G25460/AT2G25625/AT2G30550/AT2G34610/AT2G35980/AT2G39200/AT2G39730/AT2G43570/AT2G44480/AT2G46950/AT3G02150/AT3G05400/AT3G14067/AT3G25010/AT3G25882/AT3G28100/AT3G43230…
GO:0010150	leaf senescence	50	AT1G22070	TGA3	NOVEL	69/4192	198/30167	7.81e-14	4.13e-12	69	AT1G01680/AT1G02390/AT1G08050/AT1G11190/AT1G13990/AT1G20900/AT1G21000/AT1G30700/AT1G32450/AT1G34420/AT1G36622/AT1G54130/AT1G54570/AT1G66830/AT1G66880/AT1G73220/AT1G73500/AT1G76680/AT1G76980/AT2G13790/AT2G13810/AT2G18690/AT2G22300/AT2G25460/AT2G25625/AT2G30550/AT2G31570/AT2G34610/AT2G35980/AT2G37750/AT2G39200/AT2G39730/AT2G42540/AT2G44300/AT2G44480/AT2G46950/AT3G05400/AT3G11340/AT3G14060/AT3G22910…
GO:0010150	leaf senescence	51	AT5G54230	AtMYB49,MYB49	NOVEL	51/4182	198/30167	6.3e-06	0.000176295	51	AT1G02390/AT1G05620/AT1G11190/AT1G18210/AT1G20900/AT1G21000/AT1G30700/AT1G31040/AT1G32450/AT1G54570/AT1G73220/AT1G73500/AT1G76680/AT1G76980/AT2G13810/AT2G18690/AT2G25460/AT2G31570/AT2G34610/AT2G37750/AT2G44300/AT2G46950/AT3G05400/AT3G07350/AT3G10500/AT3G10985/AT3G11340/AT3G14060/AT3G25882/AT3G52430/AT3G54680/AT3G60670/AT4G01870/AT4G02380/AT4G10500/AT4G15610/AT4G30490/AT4G32940/AT4G36040/AT5G23950…
GO:0010150	leaf senescence	52	AT2G47460	ATMYB12,MYB12,PFG1	NOVEL	53/4148	198/30167	9.38e-07	2.47e-05	53	AT1G02390/AT1G05620/AT1G09176/AT1G20900/AT1G30700/AT1G31040/AT1G32450/AT1G54570/AT1G69490/AT1G73220/AT1G73500/AT1G76680/AT1G76980/AT2G13810/AT2G25460/AT2G25625/AT2G31570/AT2G34610/AT2G35980/AT2G37750/AT2G39200/AT2G43000/AT2G44300/AT2G46950/AT3G05400/AT3G07350/AT3G11340/AT3G14060/AT3G22910/AT3G25882/AT3G56400/AT3G60670/AT4G01870/AT4G02380/AT4G10500/AT4G12735/AT4G15610/AT4G23810/AT4G32940/AT5G23950…
GO:0010150	leaf senescence	53	AT5G42630	ATS,KAN4	NOVEL	53/4145	198/30167	9.18e-07	2.67e-05	53	AT1G02390/AT1G20900/AT1G30700/AT1G31040/AT1G32450/AT1G36622/AT1G54570/AT1G69490/AT1G73220/AT1G73500/AT1G76680/AT1G76980/AT2G13810/AT2G25460/AT2G25625/AT2G31570/AT2G34610/AT2G35980/AT2G37750/AT2G39200/AT2G42540/AT2G43000/AT2G44300/AT2G46950/AT3G05400/AT3G11340/AT3G14060/AT3G25010/AT3G25882/AT3G50760/AT3G56400/AT3G60670/AT4G01870/AT4G02380/AT4G10500/AT4G12735/AT4G15610/AT4G23810/AT4G30490/AT4G32940…
GO:0010150	leaf senescence	54	AT2G20570	ATGLK1,GLK1,GPRI1	NOVEL	69/4157	198/30167	5.17e-14	4.63e-12	69	AT1G01680/AT1G09176/AT1G09500/AT1G13990/AT1G21000/AT1G30700/AT1G32450/AT1G34420/AT1G36622/AT1G54130/AT1G66330/AT1G66830/AT1G66880/AT1G69490/AT1G73220/AT1G73500/AT1G76680/AT1G76980/AT1G79520/AT2G13790/AT2G13810/AT2G22300/AT2G25460/AT2G25625/AT2G30550/AT2G34610/AT2G35980/AT2G39200/AT2G39730/AT2G43570/AT2G44480/AT2G46950/AT3G05400/AT3G10985/AT3G11340/AT3G14067/AT3G25010/AT3G25882/AT3G26210/AT3G27110…
GO:0010150	leaf senescence	55	AT4G22070	ATWRKY31,WRKY31	NOVEL	55/4127	198/30167	1.35e-07	4.84e-06	55	AT1G02390/AT1G05620/AT1G11190/AT1G30700/AT1G31040/AT1G32450/AT1G54570/AT1G73220/AT1G73500/AT1G76680/AT1G76980/AT2G13810/AT2G18690/AT2G25460/AT2G31570/AT2G34610/AT2G35980/AT2G37750/AT2G39200/AT2G43000/AT2G44480/AT2G46950/AT3G05400/AT3G07350/AT3G10500/AT3G10985/AT3G11340/AT3G14060/AT3G25882/AT3G29035/AT3G48020/AT3G54680/AT3G56400/AT3G60670/AT4G01250/AT4G01870/AT4G02380/AT4G10500/AT4G12735/AT4G15610…
GO:0010150	leaf senescence	56	AT3G16160	AT3G16160	NOVEL	48/4118	198/30167	4.2e-05	0.00125002	48	AT1G01680/AT1G02390/AT1G05620/AT1G09176/AT1G11190/AT1G30700/AT1G32450/AT1G36622/AT1G54570/AT1G73220/AT1G73500/AT1G76680/AT2G13810/AT2G25460/AT2G25625/AT2G34610/AT2G37750/AT2G39730/AT2G43000/AT2G44300/AT2G44480/AT2G46950/AT3G05400/AT3G10985/AT3G11340/AT3G14060/AT3G25882/AT3G60670/AT4G01870/AT4G02380/AT4G10500/AT4G12735/AT4G15610/AT4G18980/AT4G23810/AT4G32940/AT4G36040/AT5G03280/AT5G24530/AT5G25930…
GO:0010150	leaf senescence	57	AT4G31800	ATWRKY18,WRKY18	NOVEL	64/4145	198/30167	1.63e-11	7.44e-10	64	AT1G01680/AT1G02390/AT1G11190/AT1G13990/AT1G21000/AT1G30700/AT1G32450/AT1G34420/AT1G36622/AT1G54040/AT1G54570/AT1G66830/AT1G66880/AT1G73220/AT1G73500/AT1G76680/AT1G76980/AT2G13790/AT2G13810/AT2G18690/AT2G22300/AT2G25460/AT2G25625/AT2G30550/AT2G31570/AT2G39200/AT2G39730/AT2G43000/AT2G43570/AT2G44300/AT2G44480/AT2G46950/AT3G05400/AT3G22910/AT3G25010/AT3G25882/AT3G28100/AT3G48080/AT3G50760/AT3G52430…
GO:0010150	leaf senescence	58	AT2G22300	CAMTA3,SR1	KNOWN	67/4129	198/30167	4.22e-13	2.38e-11	67	AT1G01680/AT1G02390/AT1G08050/AT1G09176/AT1G11190/AT1G13990/AT1G21000/AT1G30700/AT1G32450/AT1G34420/AT1G36622/AT1G54130/AT1G54570/AT1G66830/AT1G66880/AT1G73220/AT1G73500/AT1G76680/AT1G76980/AT2G13790/AT2G13810/AT2G18690/AT2G25460/AT2G30550/AT2G31570/AT2G34610/AT2G35980/AT2G39200/AT2G39730/AT2G43000/AT2G44300/AT2G44480/AT2G46950/AT3G05400/AT3G11340/AT3G14060/AT3G25010/AT3G25882/AT3G26210/AT3G43230…
GO:0010150	leaf senescence	59	AT5G19790	RAP2.11	NOVEL	46/4105	198/30167	0.000163188	0.00333515	46	AT1G02390/AT1G05620/AT1G11190/AT1G20180/AT1G30700/AT1G31040/AT1G32450/AT1G54570/AT1G73220/AT1G73500/AT1G76680/AT1G76980/AT2G13810/AT2G25460/AT2G31570/AT2G34610/AT2G37750/AT2G44300/AT2G46950/AT3G05400/AT3G07350/AT3G10500/AT3G10985/AT3G11340/AT3G22910/AT3G29035/AT3G48020/AT3G54680/AT3G56400/AT3G60670/AT4G01870/AT4G02380/AT4G15610/AT4G32940/AT4G36040/AT5G23950/AT5G24530/AT5G25930/AT5G37600/AT5G39050…
GO:0010150	leaf senescence	60	AT2G33710	AT2G33710	NOVEL	61/4085	198/30167	2.37e-10	1.13e-08	61	AT1G02390/AT1G05620/AT1G09176/AT1G11190/AT1G17020/AT1G20900/AT1G30700/AT1G31040/AT1G32450/AT1G36622/AT1G54570/AT1G66830/AT1G69490/AT1G73220/AT1G73500/AT1G73680/AT1G76680/AT1G76980/AT2G13810/AT2G18690/AT2G25460/AT2G30550/AT2G31570/AT2G34610/AT2G35980/AT2G37750/AT2G39200/AT2G43000/AT2G44300/AT2G46950/AT3G05400/AT3G10500/AT3G11340/AT3G14060/AT3G22910/AT3G25882/AT3G26210/AT3G56400/AT3G60670/AT4G01870…
GO:0010150	leaf senescence	61	AT1G79180	ATMYB63,MYB63	NOVEL	48/4073	198/30167	3.17e-05	0.000636524	48	AT1G02390/AT1G09176/AT1G11190/AT1G17020/AT1G20180/AT1G20900/AT1G30700/AT1G31040/AT1G32450/AT1G54570/AT1G66830/AT1G73220/AT1G73500/AT1G76680/AT1G76980/AT2G13810/AT2G25460/AT2G34610/AT2G35980/AT2G37750/AT2G44300/AT2G46950/AT3G05400/AT3G11340/AT3G14060/AT3G22910/AT3G25010/AT3G25882/AT3G60670/AT4G01870/AT4G02380/AT4G12735/AT4G15610/AT4G23810/AT4G36040/AT5G03280/AT5G24530/AT5G25930/AT5G35110/AT5G39050…
GO:0010150	leaf senescence	62	AT2G44730	AT2G44730	NOVEL	57/4080	198/30167	1.36e-08	5.71e-07	57	AT1G02390/AT1G08050/AT1G11190/AT1G13990/AT1G21000/AT1G27300/AT1G30700/AT1G32450/AT1G36622/AT1G54130/AT1G54570/AT1G66830/AT1G66880/AT1G69490/AT1G73220/AT1G73500/AT1G76680/AT1G76980/AT2G13810/AT2G22300/AT2G25625/AT2G30550/AT2G31570/AT2G31690/AT2G34610/AT2G39200/AT2G44300/AT2G44480/AT2G46700/AT2G46950/AT3G05400/AT3G10500/AT3G11340/AT3G25010/AT3G43230/AT3G60670/AT4G01250/AT4G01870/AT4G02380/AT4G03550…
GO:0010150	leaf senescence	63	AT3G22830	AT-HSFA6B,HSFA6B	NOVEL	54/4078	198/30167	2.26e-07	7.11e-06	54	AT1G02390/AT1G11190/AT1G20180/AT1G20900/AT1G30700/AT1G32450/AT1G36622/AT1G54130/AT1G69490/AT1G73220/AT1G73500/AT1G76680/AT1G76980/AT2G13810/AT2G22300/AT2G25460/AT2G25625/AT2G31570/AT2G34610/AT2G35980/AT2G37750/AT2G39200/AT2G43000/AT2G44300/AT2G46950/AT3G05400/AT3G11340/AT3G14060/AT3G22910/AT3G25010/AT3G25882/AT3G56400/AT3G60670/AT4G01870/AT4G02380/AT4G12735/AT4G14365/AT4G15610/AT4G18980/AT4G23810…
GO:0010150	leaf senescence	64	AT5G57150	AT5G57150	NOVEL	51/4075	198/30167	2.99e-06	7.63e-05	51	AT1G02390/AT1G08050/AT1G11190/AT1G21000/AT1G30700/AT1G32450/AT1G36622/AT1G54130/AT1G54570/AT1G66830/AT1G73220/AT1G73500/AT1G76680/AT1G76980/AT2G13810/AT2G18690/AT2G22300/AT2G25460/AT2G25625/AT2G30550/AT2G31570/AT2G34610/AT2G35980/AT2G39200/AT2G44300/AT2G46700/AT2G46950/AT3G05400/AT3G10500/AT3G11340/AT3G25010/AT3G60670/AT4G01870/AT4G02380/AT4G03550/AT4G10500/AT4G15610/AT4G18980/AT4G23810/AT4G32940…
GO:0010150	leaf senescence	65	AT3G01330	DEL3,E2FF,E2L2	NOVEL	40/4038	198/30167	0.00480067	0.0445111	40	AT1G02390/AT1G09176/AT1G11190/AT1G17020/AT1G20180/AT1G20900/AT1G30700/AT1G31040/AT1G32450/AT1G36622/AT1G73220/AT1G76680/AT2G13810/AT2G25460/AT2G34610/AT2G39200/AT2G42540/AT2G44300/AT2G46950/AT3G05400/AT3G11340/AT3G14060/AT3G22910/AT3G25010/AT3G25882/AT3G56400/AT3G60670/AT4G01870/AT4G02380/AT4G12735/AT4G23810/AT5G03280/AT5G24530/AT5G25930/AT5G44610/AT5G52310/AT5G56870/AT5G59220/AT5G62165/AT5G63130
GO:0010150	leaf senescence	66	AT4G12350	AtMYB42,MYB42	NOVEL	53/4056	198/30167	4.65e-07	1.69e-05	53	AT1G02390/AT1G05620/AT1G11190/AT1G13990/AT1G18210/AT1G30700/AT1G31040/AT1G54570/AT1G73220/AT1G73500/AT1G76680/AT1G76980/AT2G13810/AT2G25460/AT2G25625/AT2G30550/AT2G31570/AT2G34610/AT2G35980/AT2G37750/AT2G42540/AT2G43000/AT2G44300/AT2G46950/AT3G05400/AT3G11340/AT3G25010/AT3G25882/AT3G51130/AT3G54680/AT3G60670/AT4G01870/AT4G02380/AT4G10500/AT4G12735/AT4G15610/AT4G18980/AT4G23810/AT4G24590/AT4G32940…
GO:0010150	leaf senescence	67	AT3G24520	AT-HSFC1,HSFC1	NOVEL	57/4067	198/30167	1.22e-08	6.13e-07	57	AT1G01680/AT1G02390/AT1G09176/AT1G11190/AT1G21000/AT1G30700/AT1G31040/AT1G32450/AT1G54570/AT1G69490/AT1G73220/AT1G73500/AT1G76680/AT1G76980/AT2G13810/AT2G18690/AT2G22300/AT2G25460/AT2G25625/AT2G31570/AT2G34610/AT2G37750/AT2G39200/AT2G43000/AT2G44300/AT2G44480/AT2G46950/AT3G05400/AT3G07350/AT3G11340/AT3G14060/AT3G22910/AT3G25010/AT3G50760/AT3G56400/AT3G60670/AT4G01250/AT4G01870/AT4G02380/AT4G10500…
GO:0010150	leaf senescence	68	AT5G45580	AT5G45580	NOVEL	50/4021	198/30167	4.64e-06	0.000108568	50	AT1G02390/AT1G05620/AT1G09176/AT1G11190/AT1G30700/AT1G31040/AT1G32450/AT1G54570/AT1G73220/AT1G73500/AT1G76680/AT1G76980/AT2G13810/AT2G25460/AT2G25625/AT2G30550/AT2G31570/AT2G34610/AT2G35980/AT2G39200/AT2G44300/AT2G46950/AT3G05400/AT3G11340/AT3G14060/AT3G22910/AT3G25882/AT3G48020/AT3G56400/AT3G60670/AT4G01870/AT4G02380/AT4G10500/AT4G12735/AT4G15610/AT4G18980/AT4G23810/AT4G32940/AT4G36040/AT5G24110…
GO:0010150	leaf senescence	69	AT5G64060	anac103,NAC103	NOVEL	40/4004	198/30167	0.00414886	0.046907	40	AT1G02390/AT1G11190/AT1G20900/AT1G30700/AT1G31040/AT1G32450/AT1G54570/AT1G73220/AT1G73500/AT1G76680/AT2G13810/AT2G18690/AT2G25460/AT2G34610/AT2G44300/AT2G44480/AT2G46950/AT3G05400/AT3G10985/AT3G11340/AT3G14060/AT3G22910/AT3G25010/AT3G60670/AT4G01870/AT4G02380/AT4G10500/AT4G12735/AT4G15610/AT4G23810/AT4G32940/AT5G03280/AT5G23950/AT5G39050/AT5G44160/AT5G44610/AT5G52300/AT5G52310/AT5G56870/AT5G62165
GO:0010150	leaf senescence	70	AT3G06490	AtMYB108,BOS1,MYB108	NOVEL	52/4009	198/30167	7.81e-07	2.45e-05	52	AT1G02390/AT1G05620/AT1G11190/AT1G18210/AT1G21000/AT1G30700/AT1G31040/AT1G32450/AT1G54570/AT1G66830/AT1G69490/AT1G73220/AT1G73500/AT1G76680/AT1G76980/AT2G13810/AT2G25460/AT2G34610/AT2G35980/AT2G37750/AT2G44300/AT2G46950/AT3G05400/AT3G07350/AT3G10985/AT3G11340/AT3G14060/AT3G25882/AT3G50030/AT3G56400/AT3G60670/AT4G01870/AT4G02380/AT4G10500/AT4G15610/AT4G18980/AT4G23810/AT4G32940/AT4G36040/AT5G23950…
GO:0010150	leaf senescence	71	AT2G28550	RAP2.7,TOE1	NOVEL	63/3979	198/30167	8.56e-12	4.33e-10	63	AT1G01680/AT1G02390/AT1G08050/AT1G09176/AT1G11190/AT1G13990/AT1G21000/AT1G30700/AT1G32450/AT1G34420/AT1G54040/AT1G54130/AT1G66830/AT1G66880/AT1G69490/AT1G73220/AT1G73500/AT1G76680/AT1G76980/AT2G13790/AT2G13810/AT2G22300/AT2G25460/AT2G25625/AT2G30550/AT2G31570/AT2G34610/AT2G35980/AT2G37750/AT2G39200/AT2G39730/AT2G42540/AT2G44300/AT2G46950/AT3G07350/AT3G11340/AT3G14067/AT3G25010/AT3G25882/AT3G28100…
GO:0010150	leaf senescence	72	AT4G09820	AtTT8,BHLH42,TT8	NOVEL	42/3952	198/30167	0.00100142	0.0147522	42	AT1G01680/AT1G02390/AT1G05620/AT1G11190/AT1G13990/AT1G20900/AT1G31040/AT1G32450/AT1G73220/AT1G73500/AT1G76680/AT1G76980/AT2G13810/AT2G22300/AT2G25460/AT2G30550/AT2G34610/AT2G44300/AT2G46950/AT3G05400/AT3G25010/AT3G25882/AT3G50760/AT3G54680/AT3G60670/AT4G01870/AT4G02380/AT4G12735/AT4G15610/AT4G18980/AT4G23810/AT4G32940/AT5G24530/AT5G25930/AT5G39050/AT5G44160/AT5G44610/AT5G52310/AT5G62000/AT5G62165…
GO:0010150	leaf senescence	73	AT4G28140	AT4G28140	NOVEL	68/3925	198/30167	1.06e-14	6.31e-13	68	AT1G01680/AT1G02390/AT1G08050/AT1G09176/AT1G11190/AT1G13990/AT1G21000/AT1G30700/AT1G32450/AT1G34420/AT1G36622/AT1G54040/AT1G54130/AT1G66830/AT1G66880/AT1G73220/AT1G73500/AT1G76680/AT1G76980/AT2G02710/AT2G13790/AT2G13810/AT2G18690/AT2G25460/AT2G30550/AT2G31570/AT2G34610/AT2G35980/AT2G37750/AT2G39200/AT2G39730/AT2G43000/AT2G44300/AT2G46950/AT3G07350/AT3G10985/AT3G11340/AT3G22910/AT3G25010/AT3G25882…
GO:0010150	leaf senescence	74	AT4G22680	AtMYB85,MYB85	NOVEL	54/3933	198/30167	6.85e-08	2.67e-06	54	AT1G02390/AT1G11190/AT1G13990/AT1G18210/AT1G30700/AT1G31040/AT1G32450/AT1G36622/AT1G54570/AT1G73220/AT1G73500/AT1G76680/AT1G76980/AT2G13810/AT2G18690/AT2G25460/AT2G25625/AT2G30550/AT2G31570/AT2G34610/AT2G35980/AT2G37750/AT2G39200/AT2G42540/AT2G43000/AT2G44300/AT2G44480/AT2G46950/AT3G05400/AT3G07350/AT3G10985/AT3G11340/AT3G14060/AT3G22910/AT3G25882/AT3G51130/AT3G54680/AT3G60670/AT4G01870/AT4G02380…
GO:0010150	leaf senescence	75	AT5G41920	AtSCL23,SCL23	NOVEL	41/3905	198/30167	0.00147029	0.0201491	41	AT1G01680/AT1G05620/AT1G09176/AT1G11190/AT1G27300/AT1G30700/AT1G32450/AT1G66830/AT1G69490/AT1G73220/AT1G73500/AT1G76680/AT2G13810/AT2G34610/AT2G39200/AT2G42540/AT2G44300/AT2G44480/AT2G46950/AT3G05400/AT3G11340/AT3G19190/AT3G25010/AT3G43230/AT3G60670/AT4G01870/AT4G02380/AT4G03550/AT4G10500/AT4G15610/AT4G18980/AT4G32940/AT5G23950/AT5G24110/AT5G25930/AT5G37600/AT5G44610/AT5G52300/AT5G52310/AT5G62000…
GO:0010150	leaf senescence	76	AT5G18090	AT5G18090	NOVEL	44/3888	198/30167	0.000188886	0.00341304	44	AT1G02390/AT1G09176/AT1G11190/AT1G20180/AT1G30700/AT1G31040/AT1G32450/AT1G36622/AT1G54040/AT1G54570/AT1G73220/AT1G73500/AT1G76680/AT1G76980/AT2G13810/AT2G25460/AT2G31570/AT2G34610/AT2G39200/AT2G46950/AT3G05400/AT3G10985/AT3G11340/AT3G25010/AT3G25882/AT3G60670/AT4G01250/AT4G01870/AT4G02380/AT4G10500/AT4G12735/AT4G15610/AT4G18980/AT4G23810/AT4G32940/AT4G36040/AT5G23950/AT5G24110/AT5G24530/AT5G25930…
GO:0010150	leaf senescence	77	AT1G23380	KNAT6,KNAT6L,KNAT6S	NOVEL	43/3893	198/30167	0.000384805	0.0043534	43	AT1G02390/AT1G20900/AT1G30700/AT1G31040/AT1G32450/AT1G54570/AT1G69490/AT1G73220/AT1G73500/AT1G76680/AT1G76980/AT2G13810/AT2G25460/AT2G31570/AT2G34610/AT2G37750/AT2G39200/AT2G44300/AT2G46950/AT3G05400/AT3G07350/AT3G11340/AT3G14060/AT3G22910/AT3G25010/AT3G25882/AT3G60670/AT4G01870/AT4G02380/AT4G10500/AT4G15610/AT4G23810/AT4G32940/AT5G24530/AT5G25930/AT5G35110/AT5G37600/AT5G39050/AT5G44160/AT5G44610…
GO:0010150	leaf senescence	78	AT2G35310	REM23	NOVEL	43/3873	198/30167	0.000344662	0.00901711	43	AT1G02390/AT1G05620/AT1G09176/AT1G11190/AT1G20180/AT1G30700/AT1G31040/AT1G32450/AT1G36622/AT1G54570/AT1G69490/AT1G73220/AT1G73500/AT1G76680/AT2G13810/AT2G25460/AT2G34610/AT2G35980/AT2G37750/AT2G44300/AT2G46950/AT3G05400/AT3G11340/AT3G25010/AT3G25882/AT3G60670/AT4G01870/AT4G02380/AT4G10500/AT4G12735/AT4G23810/AT4G32940/AT5G03280/AT5G23950/AT5G25930/AT5G39050/AT5G44160/AT5G44610/AT5G52300/AT5G52310…
GO:0010150	leaf senescence	79	AT2G36890	ATMYB38,BIT1,MYB38,RAX2	NOVEL	49/3892	198/30167	4.23e-06	9.34e-05	49	AT1G02390/AT1G05620/AT1G20900/AT1G30700/AT1G31040/AT1G32450/AT1G36622/AT1G54570/AT1G69490/AT1G73220/AT1G73500/AT1G73680/AT1G76680/AT1G76980/AT2G13810/AT2G25460/AT2G25625/AT2G31570/AT2G34610/AT2G35980/AT2G37750/AT2G39200/AT2G44300/AT2G44480/AT2G46950/AT3G05400/AT3G11340/AT3G14060/AT3G22910/AT3G25010/AT3G25882/AT3G52430/AT3G60670/AT4G01870/AT4G02380/AT4G12735/AT4G15610/AT4G23810/AT4G32940/AT5G24110…
GO:0010150	leaf senescence	80	AT4G34400	AT4G34400	NOVEL	50/3880	198/30167	1.66e-06	4.84e-05	50	AT1G01680/AT1G02390/AT1G05620/AT1G09176/AT1G11190/AT1G20180/AT1G30700/AT1G31040/AT1G32450/AT1G73220/AT1G73500/AT1G76680/AT2G13810/AT2G18690/AT2G22300/AT2G25460/AT2G31570/AT2G34610/AT2G35980/AT2G37750/AT2G39200/AT2G43570/AT2G44300/AT3G05400/AT3G10985/AT3G11340/AT3G14060/AT3G25882/AT3G56400/AT3G60670/AT4G01870/AT4G02380/AT4G10500/AT4G12735/AT4G15610/AT4G18980/AT4G23810/AT4G32940/AT4G36040/AT5G23950…
GO:0010150	leaf senescence	81	AT2G26150	ATHSFA2,HSFA2	NOVEL	63/3870	198/30167	2.54e-12	1.86e-10	63	AT1G01680/AT1G02390/AT1G08050/AT1G11190/AT1G21000/AT1G30700/AT1G31040/AT1G32450/AT1G34420/AT1G36622/AT1G66830/AT1G66880/AT1G69490/AT1G73220/AT1G73500/AT1G76680/AT1G76980/AT2G13810/AT2G18690/AT2G22300/AT2G25460/AT2G25625/AT2G30550/AT2G31570/AT2G34610/AT2G35980/AT2G37750/AT2G39200/AT2G43000/AT2G43570/AT2G44300/AT2G46950/AT3G05400/AT3G07350/AT3G10500/AT3G11340/AT3G14060/AT3G22910/AT3G25010/AT3G25882…
GO:0010150	leaf senescence	82	AT1G29280	ATWRKY65,WRKY65	NOVEL	52/3865	198/30167	2.5e-07	7.18e-06	52	AT1G02390/AT1G11190/AT1G20900/AT1G30700/AT1G31040/AT1G32450/AT1G54570/AT1G66830/AT1G69490/AT1G73220/AT1G73500/AT1G76680/AT1G76980/AT2G18690/AT2G25460/AT2G25625/AT2G34610/AT2G37750/AT2G39200/AT2G42540/AT2G44300/AT2G44480/AT2G46950/AT3G10500/AT3G11340/AT3G14060/AT3G22910/AT3G25010/AT3G25882/AT3G29035/AT3G60670/AT4G01870/AT4G02380/AT4G10500/AT4G15610/AT4G18980/AT4G23810/AT4G32940/AT5G03280/AT5G23950…
GO:0010150	leaf senescence	83	AT4G28530	anac074,KIRA1,NAC074	NOVEL	39/3858	198/30167	0.00382078	0.0418998	39	AT1G02390/AT1G05620/AT1G11190/AT1G30700/AT1G31040/AT1G54130/AT1G54570/AT1G73220/AT1G73500/AT1G76680/AT2G13810/AT2G25460/AT2G34610/AT2G44300/AT2G46950/AT3G05400/AT3G25882/AT3G54680/AT3G60670/AT4G01870/AT4G02380/AT4G10500/AT4G14370/AT4G15610/AT4G32940/AT5G23950/AT5G24110/AT5G24530/AT5G25930/AT5G35110/AT5G39050/AT5G44160/AT5G44610/AT5G52300/AT5G52310/AT5G62000/AT5G62165/AT5G63130/AT5G64940
GO:0010150	leaf senescence	84	AT1G35515	MYB8	NOVEL	46/3850	198/30167	3.47e-05	0.000846281	46	AT1G02390/AT1G05620/AT1G11190/AT1G20900/AT1G30700/AT1G31040/AT1G32450/AT1G54570/AT1G73220/AT1G73500/AT1G76680/AT2G13810/AT2G25460/AT2G30550/AT2G34610/AT2G35980/AT2G44300/AT2G44480/AT2G46950/AT3G05400/AT3G10985/AT3G11340/AT3G25010/AT3G29035/AT3G52430/AT3G60670/AT4G01870/AT4G02380/AT4G10500/AT4G12735/AT4G15610/AT4G18980/AT4G32940/AT4G36040/AT5G23950/AT5G24110/AT5G24530/AT5G25930/AT5G35110/AT5G39050…
GO:0010150	leaf senescence	85	AT1G69600	ATHB29,ZFHD1,ZHD11	NOVEL	50/3855	198/30167	1.38e-06	3.14e-05	50	AT1G02390/AT1G05620/AT1G13990/AT1G20900/AT1G21000/AT1G30700/AT1G31040/AT1G32450/AT1G54570/AT1G69490/AT1G73220/AT1G73500/AT1G76680/AT1G76980/AT2G13810/AT2G25460/AT2G25625/AT2G31570/AT2G34610/AT2G35980/AT2G37750/AT2G39200/AT2G43000/AT2G44300/AT2G46950/AT3G05400/AT3G07350/AT3G11340/AT3G14060/AT3G29035/AT3G60670/AT4G01870/AT4G02380/AT4G10500/AT4G15610/AT4G18980/AT4G23810/AT4G32940/AT4G36040/AT5G23950…
GO:0010150	leaf senescence	86	AT4G00150	ATHAM3,HAM3,LOM3,SCL6-IV	NOVEL	44/3848	198/30167	0.000149539	0.00236475	44	AT1G02390/AT1G08050/AT1G09176/AT1G11190/AT1G21000/AT1G30700/AT1G32450/AT1G36622/AT1G66830/AT1G69490/AT1G73220/AT1G73500/AT1G76680/AT2G13810/AT2G25460/AT2G25625/AT2G30550/AT2G31570/AT2G34610/AT2G35980/AT2G39200/AT2G44300/AT2G46950/AT3G05400/AT3G11340/AT3G25010/AT4G01870/AT4G02380/AT4G15610/AT4G18980/AT4G23810/AT4G32940/AT4G36040/AT5G24110/AT5G24530/AT5G25930/AT5G39050/AT5G44610/AT5G52300/AT5G52310…
GO:0010150	leaf senescence	87	AT5G13330	Rap2.6L	NOVEL	55/3840	198/30167	1.14e-08	4.52e-07	55	AT1G02390/AT1G05620/AT1G11190/AT1G20900/AT1G21000/AT1G30700/AT1G31040/AT1G32450/AT1G54570/AT1G66830/AT1G69490/AT1G73220/AT1G73500/AT1G76680/AT1G76980/AT2G13810/AT2G18690/AT2G25460/AT2G25625/AT2G31570/AT2G34610/AT2G35980/AT2G39200/AT2G44300/AT2G44480/AT2G46950/AT3G05400/AT3G10500/AT3G11340/AT3G14060/AT3G22910/AT3G25882/AT3G29035/AT3G48020/AT3G60670/AT4G01870/AT4G02380/AT4G10500/AT4G15610/AT4G18980…
GO:0010150	leaf senescence	88	AT5G53290	CRF3	NOVEL	48/3816	198/30167	5.61e-06	0.000126242	48	AT1G02390/AT1G11190/AT1G20900/AT1G30700/AT1G31040/AT1G32450/AT1G54570/AT1G69490/AT1G73220/AT1G73500/AT1G76680/AT1G76980/AT2G18690/AT2G25460/AT2G31570/AT2G34610/AT2G35980/AT2G37750/AT2G39200/AT2G43000/AT2G44300/AT2G46950/AT3G05400/AT3G07350/AT3G11340/AT3G14060/AT3G22910/AT3G26210/AT3G50760/AT3G56400/AT3G60670/AT4G01870/AT4G02380/AT4G10500/AT4G15610/AT4G23810/AT4G32940/AT4G36040/AT5G24110/AT5G24530…
GO:0010150	leaf senescence	89	AT1G68880	AtbZIP,bZIP	NOVEL	45/3825	198/30167	6.29e-05	0.00105569	45	AT1G02390/AT1G05620/AT1G11190/AT1G20900/AT1G21000/AT1G30700/AT1G32450/AT1G36622/AT1G54570/AT1G73220/AT1G73500/AT1G76680/AT1G76980/AT2G13810/AT2G25460/AT2G31570/AT2G34610/AT2G37750/AT2G39200/AT2G44300/AT2G46950/AT3G05400/AT3G07350/AT3G10985/AT3G11340/AT3G25882/AT3G60670/AT4G01250/AT4G01870/AT4G02380/AT4G15610/AT4G23810/AT4G32940/AT4G36040/AT5G23950/AT5G24530/AT5G39050/AT5G44160/AT5G44610/AT5G52300…
GO:0010150	leaf senescence	90	AT1G12610	ATDDF1,DDF1	NOVEL	66/3840	198/30167	4.59e-14	2.69e-12	66	AT1G01680/AT1G02390/AT1G08050/AT1G09176/AT1G11190/AT1G13990/AT1G21000/AT1G30700/AT1G32450/AT1G34420/AT1G36622/AT1G66830/AT1G66880/AT1G68620/AT1G69490/AT1G73220/AT1G73500/AT1G76680/AT1G76980/AT2G13790/AT2G13810/AT2G22300/AT2G25460/AT2G25625/AT2G30550/AT2G31570/AT2G34610/AT2G35980/AT2G39200/AT2G39730/AT2G43000/AT2G44300/AT2G44480/AT2G46950/AT3G05400/AT3G07350/AT3G11340/AT3G22910/AT3G25010/AT3G25882…
GO:0010150	leaf senescence	91	AT2G36270	ABI5,AtABI5,DPBF1,GIA1	NOVEL	59/3817	198/30167	1.36e-10	9.31e-09	59	AT1G01680/AT1G02390/AT1G13990/AT1G20180/AT1G20900/AT1G30700/AT1G31040/AT1G32450/AT1G54570/AT1G66830/AT1G69490/AT1G73220/AT1G73500/AT1G76680/AT1G76980/AT2G13810/AT2G18690/AT2G22300/AT2G25460/AT2G31570/AT2G34610/AT2G35980/AT2G37750/AT2G39200/AT2G43000/AT2G44300/AT2G44480/AT2G46950/AT3G05400/AT3G10500/AT3G11340/AT3G14060/AT3G22910/AT3G25010/AT3G25882/AT3G48020/AT3G60670/AT4G01870/AT4G02380/AT4G10500…
GO:0010150	leaf senescence	92	AT4G17710	HDG4	NOVEL	41/3802	198/30167	0.000875813	0.0147966	41	AT1G01680/AT1G02390/AT1G05620/AT1G09176/AT1G11190/AT1G31040/AT1G32450/AT1G54130/AT1G54570/AT1G73220/AT1G73500/AT1G76680/AT1G76980/AT2G13810/AT2G22300/AT2G25460/AT2G34610/AT2G44300/AT2G44480/AT2G46950/AT3G05400/AT3G22910/AT3G25882/AT3G60670/AT4G01870/AT4G02380/AT4G10500/AT4G12735/AT4G15610/AT4G18980/AT4G32940/AT5G24110/AT5G24530/AT5G25930/AT5G37600/AT5G39050/AT5G44160/AT5G44610/AT5G52310/AT5G62165…
GO:0010150	leaf senescence	93	AT1G19210	ERF017,ERF17	NOVEL	60/3812	198/30167	4.25e-11	1.91e-09	60	AT1G01680/AT1G02390/AT1G11190/AT1G13990/AT1G21000/AT1G30700/AT1G31040/AT1G32450/AT1G36622/AT1G54130/AT1G66880/AT1G73220/AT1G73500/AT1G76680/AT1G76980/AT2G13810/AT2G18690/AT2G22300/AT2G25460/AT2G25625/AT2G30550/AT2G31570/AT2G34610/AT2G35980/AT2G39200/AT2G43000/AT2G44300/AT2G44480/AT2G46950/AT3G05400/AT3G14060/AT3G14067/AT3G22910/AT3G25010/AT3G25882/AT3G26210/AT3G29035/AT3G50760/AT3G52430/AT3G56400…
GO:0010150	leaf senescence	94	AT5G23000	ATMYB37,MYB37,RAX1	NOVEL	41/3782	198/30167	0.00078913	0.0102587	41	AT1G02390/AT1G11190/AT1G20900/AT1G30700/AT1G31040/AT1G32450/AT1G54570/AT1G69490/AT1G73220/AT1G73500/AT1G76680/AT2G13810/AT2G25460/AT2G31570/AT2G34610/AT2G35980/AT2G37750/AT2G44300/AT2G46950/AT3G05400/AT3G07350/AT3G11340/AT3G22910/AT3G25882/AT3G56400/AT3G60670/AT4G01870/AT4G02380/AT4G12735/AT4G15610/AT4G32940/AT5G23950/AT5G24530/AT5G25930/AT5G37600/AT5G39050/AT5G44160/AT5G44610/AT5G52310/AT5G62165…
GO:0010150	leaf senescence	95	AT2G37060	NF-YB8	NOVEL	43/3806	198/30167	0.000236176	0.00300417	43	AT1G02390/AT1G05620/AT1G11190/AT1G17020/AT1G20900/AT1G30700/AT1G31040/AT1G32450/AT1G54570/AT1G69490/AT1G73220/AT1G76680/AT2G25460/AT2G31570/AT2G34610/AT2G37750/AT2G39200/AT2G44300/AT2G46950/AT3G05400/AT3G07350/AT3G11340/AT3G14060/AT3G25882/AT3G50030/AT3G56400/AT3G60670/AT4G01870/AT4G02380/AT4G10500/AT4G15610/AT4G23810/AT4G32940/AT5G24530/AT5G25930/AT5G35110/AT5G44160/AT5G44610/AT5G52310/AT5G56870…
GO:0010150	leaf senescence	96	AT3G58780	AGL1,SHP1	NOVEL	44/3793	198/30167	0.00010757	0.00243157	44	AT1G01230/AT1G01680/AT1G02390/AT1G11190/AT1G20180/AT1G54130/AT1G54570/AT1G66830/AT1G73220/AT1G73500/AT1G76680/AT1G76980/AT2G13810/AT2G25460/AT2G25625/AT2G30550/AT2G34610/AT2G43000/AT2G44300/AT2G46950/AT3G05400/AT3G10985/AT3G25882/AT3G50760/AT3G54680/AT3G60670/AT4G01870/AT4G02380/AT4G10500/AT4G12735/AT4G18980/AT4G24590/AT4G32940/AT4G36040/AT5G24530/AT5G25930/AT5G44160/AT5G44610/AT5G52300/AT5G52310…
GO:0010150	leaf senescence	97	AT3G48920	AtMYB45,MYB45	NOVEL	42/3779	198/30167	0.000401776	0.0050222	42	AT1G02390/AT1G05620/AT1G11190/AT1G18210/AT1G30700/AT1G31040/AT1G32450/AT1G54570/AT1G73220/AT1G76680/AT1G76980/AT2G13810/AT2G25460/AT2G31570/AT2G34610/AT2G37750/AT2G46950/AT3G05400/AT3G07350/AT3G10500/AT3G10985/AT3G11340/AT3G14060/AT3G22910/AT3G25882/AT3G29035/AT3G54680/AT3G60670/AT4G01870/AT4G02380/AT4G15610/AT4G32940/AT4G36040/AT5G24530/AT5G37600/AT5G39050/AT5G44160/AT5G44610/AT5G52310/AT5G56870…
GO:0010150	leaf senescence	98	AT2G45480	AtGRF9,GRF9	NOVEL	44/3751	198/30167	8.31e-05	0.00172088	44	AT1G02390/AT1G09176/AT1G11190/AT1G17020/AT1G20900/AT1G30700/AT1G31040/AT1G32450/AT1G54570/AT1G69490/AT1G73220/AT1G73500/AT1G76680/AT2G13810/AT2G25460/AT2G34610/AT2G35980/AT2G42540/AT2G43570/AT2G44300/AT2G46950/AT3G05400/AT3G11340/AT3G14060/AT3G22910/AT3G25882/AT3G56400/AT3G60670/AT4G01870/AT4G02380/AT4G10500/AT4G12735/AT4G15610/AT5G03280/AT5G23950/AT5G24530/AT5G25930/AT5G39050/AT5G44160/AT5G44610…
GO:0010150	leaf senescence	99	AT3G27650	LBD25	NOVEL	40/3754	198/30167	0.00128808	0.0155221	40	AT1G02390/AT1G09176/AT1G11190/AT1G20900/AT1G21000/AT1G30700/AT1G31040/AT1G32450/AT1G54570/AT1G73220/AT1G73500/AT1G76680/AT2G13810/AT2G25460/AT2G34610/AT2G44300/AT2G46950/AT3G05400/AT3G07350/AT3G10985/AT3G11340/AT3G14060/AT3G22910/AT3G25882/AT3G60670/AT4G01870/AT4G02380/AT4G10500/AT4G15610/AT4G32940/AT4G36040/AT5G24530/AT5G35110/AT5G44160/AT5G44610/AT5G52300/AT5G52310/AT5G59220/AT5G62165/AT5G63130
GO:0010150	leaf senescence	100	AT5G62165	AGL42,FYF	KNOWN	41/3754	198/30167	0.00068061	0.0128269	41	AT1G01230/AT1G01680/AT1G02390/AT1G09176/AT1G11190/AT1G32450/AT1G36622/AT1G54570/AT1G66830/AT1G66880/AT1G73220/AT1G73500/AT1G76680/AT2G13810/AT2G30550/AT2G34610/AT2G44300/AT2G44480/AT2G46950/AT3G05400/AT3G10985/AT3G25010/AT3G25882/AT3G60670/AT4G01870/AT4G02380/AT4G10500/AT4G12735/AT4G32940/AT4G36040/AT5G03280/AT5G24110/AT5G24530/AT5G25930/AT5G37600/AT5G39050/AT5G44160/AT5G44610/AT5G52310/AT5G56870…
GO:0010150	leaf senescence	101	AT5G08330	AtTCP21,CHE,TCP21	NOVEL	56/3753	198/30167	1.8e-09	8.55e-08	56	AT1G01680/AT1G02390/AT1G08050/AT1G09176/AT1G20900/AT1G21000/AT1G30700/AT1G31040/AT1G32450/AT1G34420/AT1G36622/AT1G54130/AT1G66830/AT1G66880/AT1G69490/AT1G73220/AT1G73500/AT1G76680/AT2G13790/AT2G13810/AT2G22300/AT2G25460/AT2G25625/AT2G30550/AT2G34610/AT2G39200/AT2G39730/AT2G44300/AT2G44480/AT2G46950/AT3G07350/AT3G11340/AT3G25010/AT3G25882/AT3G43230/AT3G52430/AT3G60670/AT4G01870/AT4G10500/AT4G12735…
GO:0010150	leaf senescence	102	AT1G08290	WIP3	NOVEL	43/3738	198/30167	0.000158625	0.00257564	43	AT1G02390/AT1G11190/AT1G18210/AT1G30700/AT1G31040/AT1G32450/AT1G73220/AT1G73500/AT1G76680/AT1G76980/AT2G13810/AT2G18690/AT2G22300/AT2G25460/AT2G34610/AT2G35980/AT2G37750/AT2G39730/AT2G44300/AT2G46950/AT3G05400/AT3G10500/AT3G10985/AT3G11340/AT3G14060/AT3G22910/AT3G25882/AT3G56400/AT3G60670/AT4G01870/AT4G02380/AT4G10500/AT4G15610/AT4G23810/AT5G24530/AT5G25930/AT5G35110/AT5G44160/AT5G44610/AT5G52310…
GO:0010150	leaf senescence	103	AT5G01900	ATWRKY62,WRKY62	NOVEL	52/3739	198/30167	8.67e-08	3.76e-06	52	AT1G01680/AT1G02390/AT1G05620/AT1G13990/AT1G18210/AT1G21000/AT1G34420/AT1G36622/AT1G54130/AT1G66880/AT1G73220/AT1G73500/AT1G76680/AT1G76980/AT2G13790/AT2G13810/AT2G18690/AT2G25460/AT2G30550/AT2G31570/AT2G34610/AT2G35980/AT2G39730/AT2G43000/AT3G05400/AT3G11340/AT3G14067/AT3G25010/AT3G25882/AT3G28100/AT3G50760/AT3G52430/AT4G01250/AT4G02380/AT4G10500/AT4G12735/AT4G18980/AT4G23810/AT4G32940/AT4G36040…
GO:0010150	leaf senescence	104	AT5G20240	PI	NOVEL	46/3726	198/30167	1.52e-05	0.000587465	46	AT1G01680/AT1G02390/AT1G05620/AT1G11190/AT1G20180/AT1G32450/AT1G36622/AT1G54130/AT1G54570/AT1G73220/AT1G73500/AT1G76680/AT2G13810/AT2G22300/AT2G25460/AT2G34610/AT2G39730/AT2G43570/AT2G44300/AT2G44480/AT2G46950/AT3G05400/AT3G10985/AT3G25010/AT3G25882/AT3G28100/AT3G60670/AT4G01870/AT4G02380/AT4G12735/AT4G15610/AT4G23810/AT4G32940/AT5G24110/AT5G24530/AT5G25930/AT5G37600/AT5G39050/AT5G44160/AT5G44610…
GO:0010150	leaf senescence	105	AT2G38470	ATWRKY33,WRKY33	NOVEL	64/3740	198/30167	1.62e-13	8.53e-12	64	AT1G01680/AT1G02390/AT1G09176/AT1G11190/AT1G13990/AT1G21000/AT1G30700/AT1G32450/AT1G34420/AT1G36622/AT1G66830/AT1G66880/AT1G73220/AT1G73500/AT1G76680/AT1G76980/AT2G13790/AT2G13810/AT2G22300/AT2G25460/AT2G25625/AT2G30550/AT2G31570/AT2G34610/AT2G35980/AT2G39200/AT2G44300/AT2G44480/AT2G46950/AT3G05400/AT3G14067/AT3G22910/AT3G25010/AT3G25882/AT3G26210/AT3G43230/AT3G50760/AT3G52430/AT3G56400/AT3G60670…
GO:0010150	leaf senescence	106	AT5G66320	GATA5	NOVEL	61/3733	198/30167	5.6e-12	3.34e-10	61	AT1G01680/AT1G02390/AT1G08050/AT1G11190/AT1G13990/AT1G20180/AT1G21000/AT1G30700/AT1G31040/AT1G32450/AT1G34420/AT1G36622/AT1G66830/AT1G66880/AT1G69490/AT1G73220/AT1G73500/AT1G76680/AT1G76980/AT2G13790/AT2G13810/AT2G18690/AT2G22300/AT2G25460/AT2G30550/AT2G34610/AT2G35980/AT2G39200/AT2G42540/AT2G44300/AT2G44480/AT2G46950/AT3G10500/AT3G11340/AT3G14060/AT3G22910/AT3G25010/AT3G25882/AT3G43230/AT3G52430…
GO:0010150	leaf senescence	107	AT1G74080	ATMYB122,MYB122	NOVEL	47/3689	198/30167	5.14e-06	0.000127066	47	AT1G01680/AT1G02390/AT1G11190/AT1G21000/AT1G30700/AT1G32450/AT1G36622/AT1G73220/AT1G73500/AT1G76680/AT1G76980/AT2G13810/AT2G18690/AT2G25460/AT2G25625/AT2G34610/AT2G37750/AT2G43000/AT2G44300/AT2G44480/AT2G46950/AT3G05400/AT3G10985/AT3G11340/AT3G14060/AT3G22910/AT3G25882/AT3G52430/AT3G54680/AT3G60670/AT4G01870/AT4G02380/AT4G10500/AT4G12735/AT4G15610/AT4G23810/AT4G36040/AT5G24110/AT5G24530/AT5G25930…
GO:0010150	leaf senescence	108	AT4G01520	anac067,NAC067	NOVEL	49/3679	198/30167	8.42e-07	2.94e-05	49	AT1G01680/AT1G02390/AT1G09176/AT1G11190/AT1G20900/AT1G21000/AT1G31040/AT1G32450/AT1G54130/AT1G54570/AT1G66880/AT1G73220/AT1G73500/AT1G76680/AT1G76980/AT2G13810/AT2G22300/AT2G25460/AT2G34610/AT2G35980/AT2G39730/AT2G44300/AT2G44480/AT2G46950/AT3G05400/AT3G15534/AT3G22910/AT3G25010/AT3G25882/AT3G50760/AT3G60670/AT4G01870/AT4G02380/AT4G10500/AT4G12735/AT4G22750/AT4G32940/AT5G03280/AT5G24110/AT5G24530…
GO:0010150	leaf senescence	109	AT5G15840	BBX1,CO,FG	NOVEL	39/3669	198/30167	0.00156497	0.0209397	39	AT1G11190/AT1G17020/AT1G30700/AT1G31040/AT1G32450/AT1G54570/AT1G73220/AT1G73500/AT1G76680/AT2G22300/AT2G25460/AT2G34610/AT2G35980/AT2G37750/AT2G39730/AT2G43000/AT2G44300/AT2G46950/AT3G05400/AT3G10985/AT3G11340/AT3G14060/AT3G22910/AT3G25010/AT3G25882/AT3G60670/AT4G01870/AT4G10500/AT4G15610/AT4G18980/AT5G25930/AT5G35110/AT5G39050/AT5G44160/AT5G44610/AT5G52300/AT5G52310/AT5G62165/AT5G63130
GO:0010150	leaf senescence	110	AT5G04390	AT5G04390	NOVEL	45/3690	198/30167	2.62e-05	0.000562886	45	AT1G02390/AT1G11190/AT1G13990/AT1G18210/AT1G30700/AT1G31040/AT1G32450/AT1G54570/AT1G73220/AT1G76680/AT1G76980/AT2G25460/AT2G30550/AT2G31570/AT2G34610/AT2G35980/AT2G37750/AT2G39200/AT2G39730/AT2G42540/AT2G44300/AT2G46950/AT3G05400/AT3G07350/AT3G11340/AT3G51130/AT3G54680/AT3G60670/AT4G01870/AT4G02380/AT4G15610/AT4G30490/AT4G32940/AT4G36040/AT5G24530/AT5G25930/AT5G35110/AT5G37600/AT5G39050/AT5G44160…
GO:0010150	leaf senescence	111	AT3G62610	ATMYB11,MYB11,PFG2	NOVEL	39/3662	198/30167	0.00151102	0.0251664	39	AT1G01680/AT1G02390/AT1G05620/AT1G11190/AT1G32450/AT1G36622/AT1G54040/AT1G73220/AT1G73500/AT1G76680/AT1G76980/AT2G13810/AT2G22300/AT2G25460/AT2G25625/AT2G30550/AT2G34610/AT2G44300/AT3G05400/AT3G25010/AT3G25882/AT3G50760/AT3G60670/AT4G01870/AT4G02380/AT4G15610/AT4G32940/AT4G36040/AT5G03280/AT5G24530/AT5G25930/AT5G39050/AT5G44160/AT5G44610/AT5G52310/AT5G62000/AT5G62165/AT5G63130/AT5G64230
GO:0010150	leaf senescence	112	AT2G35530	AT2G35530	NOVEL	48/3666	198/30167	1.84e-06	5.99e-05	48	AT1G02390/AT1G08050/AT1G11190/AT1G20180/AT1G21000/AT1G30700/AT1G32450/AT1G36622/AT1G66880/AT1G73220/AT1G73500/AT1G76680/AT1G76980/AT2G13810/AT2G25460/AT2G30550/AT2G31570/AT2G34610/AT2G35980/AT2G39200/AT2G44300/AT2G44480/AT2G46700/AT2G46950/AT3G05400/AT3G10500/AT3G11340/AT3G25010/AT3G60670/AT4G01250/AT4G01870/AT4G02380/AT4G03550/AT4G10500/AT4G15610/AT4G18980/AT4G23810/AT4G30490/AT4G32940/AT4G36040…
GO:0010150	leaf senescence	113	AT5G66870	ASL1,LBD36	NOVEL	50/3660	198/30167	2.9e-07	8.46e-06	50	AT1G02390/AT1G05620/AT1G11190/AT1G20900/AT1G30700/AT1G31040/AT1G32450/AT1G73220/AT1G73500/AT1G76680/AT1G76980/AT2G13810/AT2G25460/AT2G30550/AT2G31570/AT2G34610/AT2G35980/AT2G37750/AT2G39200/AT2G43000/AT2G44300/AT2G46950/AT3G05400/AT3G11340/AT3G14060/AT3G50760/AT3G56400/AT3G60670/AT4G01870/AT4G02380/AT4G10500/AT4G12735/AT4G15610/AT4G23810/AT4G30490/AT4G32940/AT4G36040/AT5G03280/AT5G23950/AT5G24110…
GO:0010150	leaf senescence	114	AT1G08320	bZIP21,TGA9	NOVEL	47/3661	198/30167	4.18e-06	0.000116442	47	AT1G11190/AT1G20900/AT1G21000/AT1G30700/AT1G31040/AT1G32450/AT1G54570/AT1G73220/AT1G73500/AT1G76680/AT1G76980/AT2G13810/AT2G25460/AT2G31570/AT2G34610/AT2G37750/AT2G44300/AT2G44480/AT2G46950/AT3G05400/AT3G07350/AT3G10500/AT3G10985/AT3G11340/AT3G14060/AT3G25882/AT3G29035/AT3G54680/AT3G60670/AT4G01870/AT4G02380/AT4G10500/AT4G15610/AT4G32940/AT4G36040/AT5G24110/AT5G24530/AT5G25930/AT5G37600/AT5G39050…
GO:0010150	leaf senescence	115	AT5G11060	KNAT4	NOVEL	53/3667	198/30167	1.71e-08	8.22e-07	53	AT1G01680/AT1G09176/AT1G21000/AT1G32450/AT1G34420/AT1G36622/AT1G54040/AT1G54130/AT1G66830/AT1G66880/AT1G69490/AT1G73220/AT1G73500/AT1G76680/AT1G76980/AT2G13790/AT2G13810/AT2G18690/AT2G25625/AT2G34610/AT2G35980/AT2G39730/AT2G44300/AT2G44480/AT2G46950/AT3G10985/AT3G11340/AT3G25010/AT3G25882/AT3G28100/AT3G43230/AT3G48080/AT3G60670/AT4G02380/AT4G10500/AT4G12735/AT4G14370/AT4G15610/AT4G18980/AT4G32940…
GO:0010150	leaf senescence	116	AT5G52020	AT5G52020	NOVEL	51/3661	198/30167	1.14e-07	4.35e-06	51	AT1G02390/AT1G11190/AT1G20900/AT1G30700/AT1G32450/AT1G36622/AT1G54040/AT1G54570/AT1G73220/AT1G73500/AT1G76680/AT1G76980/AT2G13810/AT2G22300/AT2G25460/AT2G25625/AT2G34610/AT2G39200/AT2G44300/AT2G44480/AT2G46950/AT3G05400/AT3G07350/AT3G11340/AT3G14060/AT3G22910/AT3G25010/AT3G50760/AT3G56400/AT3G60670/AT4G01870/AT4G02380/AT4G10500/AT4G12735/AT4G15610/AT4G18980/AT4G23810/AT4G30490/AT4G32940/AT4G36040…
GO:0010150	leaf senescence	117	AT3G54990	SMZ	NOVEL	46/3612	198/30167	6.75e-06	0.000146416	46	AT1G02390/AT1G09176/AT1G11190/AT1G20900/AT1G30700/AT1G31040/AT1G32450/AT1G36622/AT1G73220/AT1G76680/AT2G13810/AT2G25460/AT2G25625/AT2G31570/AT2G34610/AT2G35980/AT2G44300/AT2G44480/AT2G46950/AT3G05400/AT3G10985/AT3G11340/AT3G14060/AT3G22910/AT3G25882/AT3G29035/AT3G60670/AT4G01870/AT4G02380/AT4G10500/AT4G15610/AT4G23810/AT4G32940/AT4G36040/AT5G23950/AT5G24110/AT5G24530/AT5G25930/AT5G35110/AT5G37600…
GO:0010150	leaf senescence	118	AT2G40340	AtERF48,DREB2C	NOVEL	48/3625	198/30167	1.34e-06	3.37e-05	48	AT1G01680/AT1G02390/AT1G05620/AT1G11190/AT1G30700/AT1G31040/AT1G32450/AT1G54570/AT1G66830/AT1G73220/AT1G73500/AT1G76680/AT1G76980/AT2G13810/AT2G18690/AT2G25460/AT2G30550/AT2G31570/AT2G34610/AT2G37750/AT2G39200/AT2G43570/AT2G44300/AT2G46950/AT3G05400/AT3G11340/AT3G14060/AT3G22910/AT3G25882/AT3G56400/AT3G60670/AT4G01870/AT4G02380/AT4G10500/AT4G12735/AT4G15610/AT4G18980/AT4G23810/AT4G32940/AT5G03280…
GO:0010150	leaf senescence	119	AT1G09540	ATMYB61,MYB61	NOVEL	41/3597	198/30167	0.000283691	0.00379336	41	AT1G02390/AT1G11190/AT1G30700/AT1G32450/AT1G54570/AT1G73220/AT1G73500/AT1G76680/AT1G76980/AT2G13810/AT2G18690/AT2G25460/AT2G31570/AT2G34610/AT2G37750/AT2G44300/AT2G46950/AT3G05400/AT3G07350/AT3G11340/AT3G14060/AT3G22910/AT3G50030/AT3G56400/AT3G60670/AT4G01870/AT4G02380/AT4G10500/AT4G15610/AT4G23810/AT4G32940/AT4G36040/AT5G24530/AT5G25930/AT5G39050/AT5G44160/AT5G44610/AT5G52300/AT5G52310/AT5G56870…
GO:0010150	leaf senescence	120	AT3G56660	BZIP49	NOVEL	50/3621	198/30167	2.09e-07	7.54e-06	50	AT1G01230/AT1G01680/AT1G02390/AT1G05620/AT1G09176/AT1G11190/AT1G18210/AT1G30700/AT1G32450/AT1G66830/AT1G73220/AT1G73500/AT1G76680/AT1G76980/AT2G13810/AT2G18690/AT2G22300/AT2G25460/AT2G30550/AT2G31570/AT2G34610/AT2G35980/AT2G37750/AT2G39200/AT2G46950/AT3G05400/AT3G14060/AT3G22910/AT3G25010/AT3G25882/AT3G54680/AT4G01250/AT4G01870/AT4G02380/AT4G12735/AT4G15610/AT4G18980/AT4G23810/AT4G24590/AT4G32940…
GO:0010150	leaf senescence	121	AT4G25490	ATCBF1,CBF1,DREB1B	NOVEL	60/3612	198/30167	4.52e-12	2.36e-10	60	AT1G01680/AT1G02230/AT1G02390/AT1G08050/AT1G11190/AT1G13990/AT1G21000/AT1G32450/AT1G36622/AT1G66830/AT1G66880/AT1G69490/AT1G73220/AT1G73500/AT1G76980/AT2G13810/AT2G18690/AT2G22300/AT2G25460/AT2G25625/AT2G30550/AT2G31570/AT2G31690/AT2G34610/AT2G35980/AT2G39200/AT2G44300/AT2G46950/AT3G05400/AT3G07350/AT3G14067/AT3G25010/AT3G25882/AT3G28100/AT3G43230/AT3G50760/AT3G52430/AT3G56400/AT3G60670/AT4G01250…
GO:0010150	leaf senescence	122	AT2G43140	bHLH129	NOVEL	55/3586	198/30167	9.78e-10	5.51e-08	55	AT1G02390/AT1G05620/AT1G11190/AT1G20180/AT1G30700/AT1G31040/AT1G32450/AT1G34420/AT1G36622/AT1G54570/AT1G66830/AT1G66880/AT1G73220/AT1G73500/AT1G76680/AT1G76980/AT2G13810/AT2G22300/AT2G25460/AT2G30550/AT2G31570/AT2G34610/AT2G35980/AT2G37750/AT2G39200/AT2G44300/AT2G44480/AT2G46950/AT3G05400/AT3G10500/AT3G11340/AT3G14060/AT3G22910/AT3G25882/AT4G01870/AT4G02380/AT4G10500/AT4G14365/AT4G15610/AT4G18980…
GO:0010150	leaf senescence	123	AT5G42700	AT5G42700	NOVEL	38/3577	198/30167	0.00183383	0.0233194	38	AT1G02390/AT1G05620/AT1G09176/AT1G11190/AT1G17020/AT1G30700/AT1G31040/AT1G32450/AT1G36622/AT1G54570/AT1G73220/AT1G73500/AT1G76680/AT2G13810/AT2G25460/AT2G34610/AT2G44300/AT2G46950/AT3G05400/AT3G11340/AT3G14060/AT3G25010/AT3G56400/AT3G60670/AT4G01870/AT4G02380/AT4G10500/AT4G12735/AT4G23810/AT5G23950/AT5G25930/AT5G35110/AT5G39050/AT5G44610/AT5G52300/AT5G52310/AT5G56870/AT5G62165
GO:0010150	leaf senescence	124	AT2G27300	ANAC040,NTL8	NOVEL	46/3573	198/30167	5.06e-06	0.000249562	46	AT1G02390/AT1G05620/AT1G11190/AT1G30700/AT1G31040/AT1G32450/AT1G54040/AT1G54130/AT1G54570/AT1G73220/AT1G76680/AT2G13810/AT2G22300/AT2G25460/AT2G34610/AT2G35980/AT2G39730/AT2G44300/AT2G44480/AT2G46950/AT3G05400/AT3G11340/AT3G14060/AT3G25882/AT4G02380/AT4G10500/AT4G12735/AT4G14370/AT4G15610/AT4G18980/AT4G23810/AT4G32940/AT5G03280/AT5G24110/AT5G24530/AT5G25930/AT5G37600/AT5G44160/AT5G44610/AT5G52300…
GO:0010150	leaf senescence	125	AT5G61590	DEWAX,ERF107	NOVEL	66/3592	198/30167	1.81e-15	1.44e-13	66	AT1G01680/AT1G02390/AT1G11190/AT1G13990/AT1G21000/AT1G30700/AT1G32450/AT1G34420/AT1G36622/AT1G54130/AT1G54570/AT1G66830/AT1G66880/AT1G69490/AT1G73220/AT1G73500/AT1G76680/AT1G76980/AT2G13790/AT2G13810/AT2G22300/AT2G25460/AT2G25625/AT2G30550/AT2G34610/AT2G35980/AT2G37750/AT2G42540/AT2G44300/AT2G46950/AT3G05400/AT3G07350/AT3G11340/AT3G14060/AT3G25010/AT3G25882/AT3G26210/AT3G43230/AT3G48020/AT3G48080…
GO:0010150	leaf senescence	126	AT1G16530	ASL9,LBD3	NOVEL	37/3570	198/30167	0.00323891	0.0324559	37	AT1G02390/AT1G05620/AT1G09176/AT1G11190/AT1G30700/AT1G32450/AT1G73220/AT1G73500/AT1G76680/AT1G76980/AT2G13810/AT2G34610/AT2G35980/AT2G43000/AT2G44300/AT2G46950/AT3G05400/AT3G07350/AT3G10985/AT3G11340/AT3G14060/AT3G25882/AT3G60670/AT4G01870/AT4G02380/AT4G10500/AT4G15610/AT4G23810/AT4G36040/AT5G25930/AT5G35110/AT5G44160/AT5G44610/AT5G52310/AT5G59220/AT5G62165/AT5G63130
GO:0010150	leaf senescence	127	AT2G36080	ABS2,NGAL1	NOVEL	46/3557	198/30167	4.49e-06	0.00010112	46	AT1G02390/AT1G11190/AT1G13990/AT1G20900/AT1G30700/AT1G31040/AT1G32450/AT1G54570/AT1G69490/AT1G73220/AT1G76680/AT2G13810/AT2G22300/AT2G25460/AT2G31570/AT2G34610/AT2G35980/AT2G37750/AT2G39200/AT2G43000/AT2G44300/AT2G44480/AT2G46950/AT3G05400/AT3G10500/AT3G11340/AT3G14060/AT3G22910/AT3G29035/AT3G60670/AT4G01870/AT4G02380/AT4G10500/AT4G15610/AT4G18980/AT4G23810/AT4G32940/AT4G36040/AT5G25930/AT5G39050…
GO:0010150	leaf senescence	128	AT5G03680	PTL	NOVEL	36/3560	198/30167	0.00549847	0.0433617	36	AT1G02390/AT1G05620/AT1G18210/AT1G20900/AT1G30700/AT1G31040/AT1G32450/AT1G54570/AT1G73220/AT1G76680/AT1G76980/AT2G13800/AT2G25460/AT2G34610/AT2G35980/AT2G44300/AT2G46950/AT3G05400/AT3G07350/AT3G10985/AT3G11340/AT3G25882/AT3G54680/AT3G60670/AT4G01870/AT4G02380/AT4G15610/AT4G36040/AT5G24530/AT5G25930/AT5G35110/AT5G44160/AT5G44610/AT5G52310/AT5G56870/AT5G62165
GO:0010150	leaf senescence	129	AT2G40470	ASL11,LBD15	NOVEL	46/3538	198/30167	3.89e-06	8.89e-05	46	AT1G02390/AT1G09176/AT1G11190/AT1G17020/AT1G30700/AT1G31040/AT1G32450/AT1G54570/AT1G73220/AT1G76680/AT1G76980/AT2G13810/AT2G25460/AT2G34610/AT2G35980/AT2G37750/AT2G39200/AT2G42540/AT2G43570/AT2G44300/AT2G44480/AT2G46950/AT3G05400/AT3G11340/AT3G14060/AT3G22910/AT3G56400/AT3G60670/AT4G01870/AT4G02380/AT4G10500/AT4G15610/AT4G23810/AT4G32940/AT5G03280/AT5G23950/AT5G24530/AT5G25930/AT5G35110/AT5G39050…
GO:0010150	leaf senescence	130	AT3G49690	ATMYB84,MYB84,RAX3,SKI2	NOVEL	49/3533	198/30167	2.52e-07	9.04e-06	49	AT1G02390/AT1G17020/AT1G30700/AT1G31040/AT1G32450/AT1G34420/AT1G54570/AT1G66830/AT1G73220/AT1G73500/AT1G76680/AT1G76980/AT2G13810/AT2G18690/AT2G25460/AT2G25625/AT2G34610/AT2G35980/AT2G37750/AT2G44300/AT2G44480/AT2G46950/AT3G05400/AT3G10985/AT3G11340/AT3G14060/AT3G25010/AT3G25882/AT3G52430/AT3G60670/AT4G01870/AT4G02380/AT4G10500/AT4G12735/AT4G15610/AT4G23810/AT4G36040/AT5G23950/AT5G24530/AT5G25930…
GO:0010150	leaf senescence	131	AT3G06160	AT3G06160	NOVEL	45/3526	198/30167	8.29e-06	0.000303062	45	AT1G01680/AT1G02390/AT1G11190/AT1G31040/AT1G32450/AT1G54130/AT1G54570/AT1G66830/AT1G73220/AT1G73500/AT1G76680/AT2G13810/AT2G18690/AT2G25460/AT2G34610/AT2G35980/AT2G39730/AT2G42540/AT2G44300/AT2G44480/AT2G46950/AT3G05400/AT3G25010/AT3G25882/AT3G50760/AT3G56400/AT3G60670/AT4G02380/AT4G10500/AT4G12735/AT4G14370/AT4G18980/AT4G23810/AT4G32940/AT5G24530/AT5G25930/AT5G37600/AT5G44160/AT5G44610/AT5G52310…
GO:0010150	leaf senescence	132	AT1G68150	ATWRKY9,WRKY9	NOVEL	43/3530	198/30167	4.27e-05	0.000784379	43	AT1G02390/AT1G05620/AT1G11190/AT1G30700/AT1G32450/AT1G54570/AT1G73220/AT1G73500/AT1G76680/AT1G76980/AT2G13810/AT2G25460/AT2G34610/AT2G37750/AT2G43000/AT2G44300/AT2G46950/AT3G05400/AT3G07350/AT3G10500/AT3G11340/AT3G14060/AT3G22910/AT3G25882/AT3G60670/AT4G01870/AT4G02380/AT4G10500/AT4G12735/AT4G15610/AT4G23810/AT4G32940/AT4G36040/AT5G23950/AT5G24110/AT5G24530/AT5G37600/AT5G39050/AT5G44160/AT5G44610…
GO:0010150	leaf senescence	133	AT5G64810	ATWRKY51,WRKY51	NOVEL	54/3545	198/30167	1.88e-09	7.09e-08	54	AT1G01680/AT1G02390/AT1G08050/AT1G11190/AT1G21000/AT1G30700/AT1G32450/AT1G54570/AT1G66880/AT1G73220/AT1G73500/AT1G76680/AT1G76980/AT2G13810/AT2G18690/AT2G25460/AT2G25625/AT2G30550/AT2G31570/AT2G34610/AT2G35980/AT2G39200/AT2G43000/AT2G44300/AT2G44480/AT2G46950/AT3G05400/AT3G10500/AT3G11340/AT3G14060/AT3G22910/AT3G25010/AT3G25882/AT3G56400/AT4G01870/AT4G02380/AT4G10500/AT4G12735/AT4G14365/AT4G15610…
GO:0010150	leaf senescence	134	AT3G23250	ATMYB15,ATY19,MYB15	NOVEL	60/3545	198/30167	2.04e-12	9.54e-11	60	AT1G01680/AT1G02390/AT1G09176/AT1G18210/AT1G21000/AT1G30700/AT1G32450/AT1G34420/AT1G36622/AT1G54040/AT1G66830/AT1G66880/AT1G73220/AT1G73500/AT1G76680/AT1G76980/AT2G13790/AT2G13810/AT2G18690/AT2G22300/AT2G25460/AT2G25625/AT2G34610/AT2G35980/AT2G37750/AT2G39200/AT2G44300/AT2G44480/AT2G46950/AT3G05400/AT3G10985/AT3G15534/AT3G22910/AT3G25010/AT3G25882/AT3G50760/AT3G52430/AT3G60670/AT4G01250/AT4G01870…
GO:0010150	leaf senescence	135	AT5G53660	AtGRF7,GRF7	NOVEL	44/3528	198/30167	1.91e-05	0.000563074	44	AT1G05620/AT1G11190/AT1G20900/AT1G30700/AT1G31040/AT1G36622/AT1G54570/AT1G66830/AT1G73220/AT1G73500/AT1G76680/AT1G76980/AT2G22300/AT2G25460/AT2G34610/AT2G35980/AT2G44300/AT2G44480/AT2G46950/AT3G05400/AT3G14060/AT3G22910/AT3G25010/AT3G25882/AT3G56860/AT3G60670/AT4G01870/AT4G02380/AT4G12735/AT4G15610/AT4G18980/AT4G23810/AT4G32940/AT5G25930/AT5G39050/AT5G44160/AT5G44610/AT5G52300/AT5G52310/AT5G56870…
GO:0010150	leaf senescence	136	AT5G14750	ATMYB66,MYB66,WER,WER1	NOVEL	47/3515	198/30167	1.36e-06	4.33e-05	47	AT1G02390/AT1G05620/AT1G11190/AT1G20900/AT1G30700/AT1G31040/AT1G32450/AT1G69490/AT1G73220/AT1G73500/AT1G76680/AT1G76980/AT2G13810/AT2G25460/AT2G31570/AT2G34610/AT2G35980/AT2G37750/AT2G39200/AT2G43000/AT2G44300/AT2G46950/AT3G05400/AT3G11340/AT3G14060/AT3G22910/AT3G25882/AT3G56400/AT3G60670/AT4G01870/AT4G02380/AT4G10500/AT4G15610/AT4G23810/AT4G32940/AT5G23950/AT5G24110/AT5G24530/AT5G25930/AT5G37600…
GO:0010150	leaf senescence	137	AT5G43840	AT-HSFA6A,HSFA6A	NOVEL	51/3534	198/30167	3.69e-08	2.36e-06	51	AT1G01680/AT1G02390/AT1G09176/AT1G09500/AT1G11190/AT1G18210/AT1G20900/AT1G21000/AT1G31040/AT1G66830/AT1G73220/AT1G76680/AT1G76980/AT2G13810/AT2G22300/AT2G25460/AT2G25625/AT2G30550/AT2G34610/AT2G35980/AT2G39200/AT2G46950/AT3G05400/AT3G10985/AT3G14067/AT3G25010/AT3G25882/AT3G29035/AT3G43230/AT3G50760/AT3G54680/AT3G60670/AT4G01870/AT4G02380/AT4G10500/AT4G12735/AT4G15610/AT4G18980/AT4G32940/AT4G36040…
GO:0010150	leaf senescence	138	AT1G03840	IDD3,MGP	NOVEL	43/3516	198/30167	3.88e-05	0.00088052	43	AT1G02390/AT1G11190/AT1G17020/AT1G20900/AT1G30700/AT1G31040/AT1G32450/AT1G54570/AT1G73220/AT1G73500/AT1G76680/AT1G76980/AT2G13810/AT2G25460/AT2G34610/AT2G35980/AT2G37750/AT2G44300/AT2G46950/AT3G05400/AT3G11340/AT3G14060/AT3G22910/AT3G25010/AT3G25882/AT3G60670/AT4G01870/AT4G02380/AT4G10500/AT4G15610/AT4G23810/AT4G32940/AT4G36040/AT5G23950/AT5G25930/AT5G37600/AT5G44160/AT5G44610/AT5G52300/AT5G52310…
GO:0010150	leaf senescence	139	AT1G02030	AT1G02030	NOVEL	50/3522	198/30167	8.82e-08	3.64e-06	50	AT1G02390/AT1G05620/AT1G11190/AT1G30700/AT1G31040/AT1G32450/AT1G54570/AT1G66830/AT1G73220/AT1G73500/AT1G76680/AT1G76980/AT2G13810/AT2G18690/AT2G25460/AT2G31570/AT2G34610/AT2G35980/AT2G37750/AT2G39200/AT2G42540/AT2G43000/AT2G44480/AT2G46950/AT3G05400/AT3G10985/AT3G11340/AT3G29035/AT3G56400/AT3G60670/AT4G01250/AT4G01870/AT4G02380/AT4G10500/AT4G12735/AT4G15610/AT4G23810/AT4G32940/AT4G36040/AT5G23950…
GO:0010150	leaf senescence	140	AT3G44350	anac061,NAC061	NOVEL	51/3531	198/30167	3.59e-08	1.27e-06	51	AT1G01680/AT1G02390/AT1G05620/AT1G13990/AT1G34420/AT1G36622/AT1G54570/AT1G66830/AT1G66880/AT1G68620/AT1G73220/AT1G73500/AT1G76680/AT2G13810/AT2G18690/AT2G22300/AT2G25460/AT2G25625/AT2G30550/AT2G34610/AT2G39730/AT2G43000/AT2G44480/AT3G05400/AT3G07350/AT3G10985/AT3G11340/AT3G22910/AT3G25010/AT3G25882/AT3G28100/AT3G50760/AT3G52430/AT4G01250/AT4G01870/AT4G02380/AT4G10500/AT4G22750/AT4G23810/AT4G32940…
GO:0010150	leaf senescence	141	AT2G44840	ATERF13,EREBP,ERF13	NOVEL	61/3536	198/30167	5.39e-13	2.8e-11	61	AT1G01680/AT1G02390/AT1G11190/AT1G21000/AT1G30700/AT1G32450/AT1G34420/AT1G36622/AT1G66880/AT1G73220/AT1G73500/AT1G76680/AT1G76980/AT2G13810/AT2G18690/AT2G22300/AT2G25460/AT2G25625/AT2G30550/AT2G34610/AT2G35980/AT2G39200/AT2G43000/AT2G44300/AT2G44480/AT2G46950/AT3G05400/AT3G07350/AT3G11340/AT3G22910/AT3G25010/AT3G25882/AT3G26210/AT3G50760/AT3G52430/AT3G56400/AT3G60670/AT4G01250/AT4G01870/AT4G02380…
GO:0010150	leaf senescence	142	AT5G37260	CIR1,RVE2	NOVEL	48/3526	198/30167	6.01e-07	1.57e-05	48	AT1G02390/AT1G11190/AT1G20900/AT1G30700/AT1G31040/AT1G32450/AT1G54570/AT1G69490/AT1G73220/AT1G73500/AT1G76680/AT1G76980/AT2G13810/AT2G25460/AT2G25625/AT2G31570/AT2G34610/AT2G35980/AT2G37750/AT2G39200/AT2G39730/AT2G44300/AT2G46950/AT3G05400/AT3G11340/AT3G14060/AT3G25010/AT3G25882/AT3G56400/AT3G60670/AT4G01870/AT4G02380/AT4G10500/AT4G12735/AT4G15610/AT4G23810/AT4G32940/AT5G24110/AT5G24530/AT5G25930…
GO:0010150	leaf senescence	143	AT1G43160	RAP2.6	NOVEL	59/3515	198/30167	4.76e-12	2.94e-10	59	AT1G01680/AT1G02390/AT1G11190/AT1G21000/AT1G30700/AT1G32450/AT1G34420/AT1G66830/AT1G66880/AT1G73220/AT1G73500/AT1G76680/AT1G76980/AT2G13810/AT2G18690/AT2G22300/AT2G25460/AT2G25625/AT2G30550/AT2G31570/AT2G34610/AT2G35980/AT2G37750/AT2G39200/AT2G43000/AT2G44300/AT2G44480/AT2G46950/AT3G05400/AT3G11340/AT3G14060/AT3G22910/AT3G25010/AT3G25882/AT3G29035/AT3G50760/AT3G56400/AT4G01870/AT4G02380/AT4G10500…
GO:0010150	leaf senescence	144	AT3G10470	AT3G10470	NOVEL	42/3503	198/30167	7.69e-05	0.00139034	42	AT1G02390/AT1G05620/AT1G11190/AT1G17020/AT1G20900/AT1G30700/AT1G31040/AT1G32450/AT1G54570/AT1G73220/AT1G76680/AT1G76980/AT2G25460/AT2G30550/AT2G31570/AT2G34610/AT2G35980/AT2G37750/AT2G39200/AT2G46950/AT3G05400/AT3G07350/AT3G11340/AT3G14060/AT3G25010/AT3G25882/AT3G60670/AT4G01870/AT4G02380/AT4G15610/AT4G23810/AT4G32940/AT4G36040/AT5G24530/AT5G25930/AT5G37600/AT5G39050/AT5G44160/AT5G44610/AT5G52300…
GO:0010150	leaf senescence	145	AT2G28810	AT2G28810	NOVEL	41/3486	198/30167	0.000145468	0.00317662	41	AT1G01680/AT1G08050/AT1G11190/AT1G13990/AT1G20180/AT1G21000/AT1G32450/AT1G54570/AT1G66830/AT1G69490/AT1G73220/AT1G73500/AT1G76680/AT2G13810/AT2G22300/AT2G34610/AT2G35980/AT2G44300/AT2G44480/AT2G46950/AT3G05400/AT3G11340/AT3G14060/AT3G25010/AT3G28100/AT3G43230/AT3G60670/AT4G01870/AT4G02380/AT4G03550/AT4G15610/AT4G32940/AT4G36040/AT5G24110/AT5G24530/AT5G39610/AT5G44610/AT5G52300/AT5G52310/AT5G62000…
GO:0010150	leaf senescence	146	AT3G51060	AtSTY1,SRS1,STY1	NOVEL	39/3472	198/30167	0.000549679	0.0113293	39	AT1G01680/AT1G11190/AT1G17020/AT1G20900/AT1G30700/AT1G31040/AT1G32450/AT1G54570/AT1G69490/AT1G73220/AT1G73500/AT1G76680/AT2G13810/AT2G25460/AT2G34610/AT2G35980/AT2G37750/AT2G43000/AT2G44300/AT2G46950/AT3G05400/AT3G11340/AT3G14060/AT3G22910/AT3G25882/AT3G60670/AT4G02380/AT4G10500/AT4G12735/AT4G15610/AT4G18980/AT4G32940/AT5G24530/AT5G25930/AT5G39050/AT5G44160/AT5G44610/AT5G52310/AT5G62165
GO:0010150	leaf senescence	147	AT1G69540	AGL94	NOVEL	43/3473	198/30167	2.9e-05	0.000800439	43	AT1G01680/AT1G02390/AT1G09176/AT1G11190/AT1G18210/AT1G21000/AT1G31040/AT1G34420/AT1G54130/AT1G54570/AT1G73220/AT1G73500/AT1G76680/AT2G13810/AT2G25460/AT2G30550/AT2G31570/AT2G34610/AT2G35980/AT2G39200/AT2G46950/AT3G05400/AT3G10985/AT3G25010/AT3G25882/AT3G50760/AT3G60670/AT4G01250/AT4G01870/AT4G10500/AT4G12735/AT4G18980/AT4G32940/AT4G36040/AT5G24110/AT5G24530/AT5G25930/AT5G37600/AT5G44610/AT5G52310…
GO:0010150	leaf senescence	148	AT1G69810	ATWRKY36,WRKY36	NOVEL	52/3469	198/30167	7.22e-09	2.78e-07	52	AT1G02390/AT1G05620/AT1G09176/AT1G11190/AT1G20900/AT1G30700/AT1G32450/AT1G36622/AT1G54570/AT1G66880/AT1G73220/AT1G76680/AT1G76980/AT2G13810/AT2G18690/AT2G25460/AT2G30550/AT2G31570/AT2G34610/AT2G35980/AT2G37750/AT2G39200/AT2G43000/AT2G44300/AT2G44480/AT2G46950/AT3G05400/AT3G11340/AT3G14060/AT3G22910/AT3G25010/AT3G25882/AT3G48020/AT3G60670/AT4G01870/AT4G02380/AT4G10500/AT4G12735/AT4G15610/AT4G18980…
GO:0010150	leaf senescence	149	AT5G51990	CBF4,DREB1D	NOVEL	49/3473	198/30167	1.5e-07	5.33e-06	49	AT1G01680/AT1G02390/AT1G11190/AT1G21000/AT1G30700/AT1G32450/AT1G54570/AT1G66880/AT1G69490/AT1G73220/AT1G73500/AT1G76680/AT1G76980/AT2G13810/AT2G18690/AT2G25460/AT2G25625/AT2G30550/AT2G34610/AT2G39200/AT2G43000/AT2G44300/AT2G44480/AT2G46950/AT3G05400/AT3G11340/AT3G22910/AT3G25010/AT3G25882/AT3G50760/AT3G52430/AT3G60670/AT4G01870/AT4G02380/AT4G12735/AT4G15610/AT4G18980/AT4G23810/AT4G32940/AT4G36040…
GO:0010150	leaf senescence	150	AT2G31210	bHLH091	NOVEL	45/3460	198/30167	5.07e-06	0.000172704	45	AT1G01680/AT1G02390/AT1G11190/AT1G18210/AT1G20180/AT1G21000/AT1G36622/AT1G54130/AT1G66830/AT1G66880/AT1G73220/AT1G73500/AT1G76680/AT1G76980/AT2G13810/AT2G25460/AT2G30550/AT2G31570/AT2G34610/AT2G35980/AT2G39200/AT2G39730/AT2G43000/AT2G46950/AT3G10985/AT3G22910/AT3G25010/AT3G25882/AT3G50760/AT4G01250/AT4G01870/AT4G02380/AT4G10500/AT4G12735/AT4G23810/AT4G32940/AT4G36040/AT5G24110/AT5G24530/AT5G25930…
GO:0010150	leaf senescence	151	AT3G18400	anac058,NAC058	NOVEL	44/3464	198/30167	1.21e-05	0.000315549	44	AT1G02390/AT1G05620/AT1G11190/AT1G18210/AT1G20180/AT1G30700/AT1G31040/AT1G32450/AT1G54570/AT1G73220/AT1G73500/AT1G76680/AT1G76980/AT2G13810/AT2G25460/AT2G30550/AT2G31570/AT2G34610/AT2G37750/AT2G43000/AT2G46950/AT3G05400/AT3G11340/AT3G14060/AT3G25882/AT3G54680/AT3G60670/AT4G01250/AT4G01870/AT4G02380/AT4G10500/AT4G15610/AT4G32940/AT4G36040/AT5G24110/AT5G24530/AT5G37600/AT5G39050/AT5G44160/AT5G44610…
GO:0010150	leaf senescence	152	AT5G15130	ATWRKY72,WRKY72	NOVEL	49/3461	198/30167	1.35e-07	5.34e-06	49	AT1G02390/AT1G05620/AT1G11190/AT1G20180/AT1G20900/AT1G30700/AT1G31040/AT1G32450/AT1G54570/AT1G73220/AT1G76680/AT1G76980/AT2G13810/AT2G25460/AT2G30550/AT2G31570/AT2G34610/AT2G35980/AT2G37750/AT2G39200/AT2G43000/AT2G44300/AT2G46950/AT3G05400/AT3G10500/AT3G11340/AT3G22910/AT3G25882/AT3G56400/AT3G60670/AT4G01870/AT4G02380/AT4G12735/AT4G15610/AT4G23810/AT4G32940/AT4G36040/AT5G23950/AT5G24110/AT5G24530…
GO:0010150	leaf senescence	153	AT3G12977	NAC1L	NOVEL	47/3456	198/30167	8.4e-07	2.97e-05	47	AT1G02390/AT1G05620/AT1G11190/AT1G30700/AT1G31040/AT1G32450/AT1G36622/AT1G54570/AT1G73220/AT1G76680/AT1G76980/AT2G13810/AT2G25460/AT2G31570/AT2G34610/AT2G37750/AT2G39200/AT2G43000/AT2G43570/AT2G46950/AT3G05400/AT3G10985/AT3G11340/AT3G14060/AT3G25882/AT3G60670/AT4G01870/AT4G02380/AT4G10500/AT4G12735/AT4G15610/AT4G18980/AT4G23810/AT4G30490/AT4G32940/AT4G36040/AT5G23950/AT5G24110/AT5G24530/AT5G37600…
GO:0010150	leaf senescence	154	AT5G10280	ATMYB64,ATMYB92,MYB92	NOVEL	40/3448	198/30167	0.000237935	0.00353002	40	AT1G02390/AT1G20180/AT1G20900/AT1G30700/AT1G31040/AT1G32450/AT1G54570/AT1G69490/AT1G73220/AT1G73500/AT1G76680/AT2G13810/AT2G25460/AT2G34610/AT2G37750/AT2G44300/AT2G44480/AT2G46950/AT3G05400/AT3G11340/AT3G14060/AT3G22910/AT3G25010/AT3G60670/AT4G01870/AT4G02380/AT4G10500/AT4G12735/AT4G15610/AT4G32940/AT5G03280/AT5G23950/AT5G24530/AT5G39050/AT5G44610/AT5G52300/AT5G52310/AT5G56870/AT5G62165/AT5G63130
GO:0010150	leaf senescence	155	AT1G01520	ASG4,REV3	NOVEL	38/3448	198/30167	0.000938693	0.0142167	38	AT1G02390/AT1G05620/AT1G11190/AT1G18210/AT1G31040/AT1G32450/AT1G73220/AT1G76680/AT2G13810/AT2G18690/AT2G25460/AT2G25625/AT2G34610/AT2G39730/AT2G43000/AT2G44300/AT3G05400/AT3G10985/AT3G11340/AT3G22910/AT3G25010/AT3G25882/AT3G54680/AT3G60670/AT4G01250/AT4G01870/AT4G02380/AT4G10500/AT4G12735/AT4G15610/AT4G32940/AT5G24110/AT5G25930/AT5G44160/AT5G44610/AT5G52310/AT5G62165/AT5G63130
GO:0010150	leaf senescence	156	AT5G53950	ANAC098,ATCUC2,CUC2	NOVEL	41/3450	198/30167	0.000116056	0.00261834	41	AT1G02390/AT1G05620/AT1G11190/AT1G30700/AT1G31040/AT1G32450/AT1G73220/AT1G76680/AT2G13810/AT2G25460/AT2G31570/AT2G34610/AT2G37750/AT2G39200/AT2G43000/AT2G46950/AT3G05400/AT3G07350/AT3G10985/AT3G11340/AT3G14060/AT3G26210/AT3G56400/AT4G01250/AT4G01870/AT4G02380/AT4G12735/AT4G15610/AT4G23810/AT4G30490/AT4G32940/AT4G36040/AT5G23950/AT5G24530/AT5G25930/AT5G37600/AT5G44160/AT5G44610/AT5G52310/AT5G62165…
GO:0010150	leaf senescence	157	AT1G28470	ANAC010,NAC010,SND3	NOVEL	44/3442	198/30167	1.03e-05	0.000221213	44	AT1G02390/AT1G11190/AT1G17020/AT1G18210/AT1G20900/AT1G30700/AT1G31040/AT1G32450/AT1G54570/AT1G73220/AT1G73500/AT1G76680/AT1G76980/AT2G25460/AT2G31570/AT2G34610/AT2G35980/AT2G39200/AT2G43000/AT2G44300/AT2G46950/AT3G05400/AT3G10985/AT3G11340/AT3G14060/AT3G25882/AT3G60670/AT4G01250/AT4G01870/AT4G02380/AT4G10500/AT4G15610/AT4G24590/AT4G32940/AT4G36040/AT5G24530/AT5G25930/AT5G44610/AT5G52300/AT5G52310…
GO:0010150	leaf senescence	158	AT2G45420	LBD18	NOVEL	39/3425	198/30167	0.000420226	0.00601051	39	AT1G02390/AT1G11190/AT1G30700/AT1G31040/AT1G32450/AT1G54570/AT1G73220/AT1G73500/AT1G76680/AT1G76980/AT2G13810/AT2G25460/AT2G30550/AT2G31570/AT2G34610/AT2G37750/AT2G43000/AT2G44300/AT2G46950/AT3G05400/AT3G14060/AT3G25882/AT3G51130/AT3G54680/AT3G60670/AT4G01870/AT4G02380/AT4G10500/AT4G12735/AT4G15610/AT4G32940/AT4G36040/AT5G24530/AT5G39050/AT5G44160/AT5G44610/AT5G52310/AT5G56870/AT5G59220
GO:0010150	leaf senescence	159	AT2G24700	AT2G24700	NOVEL	38/3422	198/30167	0.000814769	0.0134667	38	AT1G02390/AT1G05620/AT1G11190/AT1G20900/AT1G30700/AT1G31040/AT1G32450/AT1G54570/AT1G69490/AT1G73220/AT1G73500/AT1G76680/AT2G13810/AT2G18690/AT2G25460/AT2G34610/AT2G35980/AT2G44300/AT2G46950/AT3G05400/AT3G14060/AT3G22910/AT3G25882/AT3G56400/AT3G60670/AT4G01870/AT4G10500/AT4G12735/AT4G32940/AT5G25930/AT5G39050/AT5G44160/AT5G44610/AT5G52310/AT5G56870/AT5G59220/AT5G62165/AT5G63130
GO:0010150	leaf senescence	160	AT1G71200	bHLH160,CITF1	NOVEL	43/3421	198/30167	2.02e-05	0.00044866	43	AT1G01680/AT1G02390/AT1G09176/AT1G11190/AT1G30700/AT1G32450/AT1G54570/AT1G73220/AT1G73500/AT1G76680/AT2G13810/AT2G18690/AT2G25460/AT2G25625/AT2G30550/AT2G31570/AT2G34610/AT2G35980/AT2G39200/AT2G43000/AT2G44300/AT2G46950/AT3G05400/AT3G11340/AT3G22910/AT3G25010/AT3G60670/AT4G01870/AT4G02380/AT4G12735/AT4G15610/AT4G18980/AT4G23810/AT4G32940/AT5G03280/AT5G23950/AT5G24530/AT5G25930/AT5G37600/AT5G39050…
GO:0010150	leaf senescence	161	AT1G31050	AT1G31050	NOVEL	43/3411	198/30167	1.88e-05	0.000468268	43	AT1G02390/AT1G20900/AT1G30700/AT1G31040/AT1G32450/AT1G54570/AT1G73220/AT1G73500/AT1G76680/AT1G76980/AT2G13810/AT2G25460/AT2G34610/AT2G35980/AT2G37750/AT2G43000/AT2G44300/AT2G46950/AT3G05400/AT3G07350/AT3G11340/AT3G14060/AT3G22910/AT3G25882/AT3G60670/AT4G01870/AT4G02380/AT4G12735/AT4G15610/AT4G32940/AT4G36040/AT5G23950/AT5G24530/AT5G25930/AT5G35110/AT5G39050/AT5G44160/AT5G44610/AT5G52300/AT5G52310…
GO:0010150	leaf senescence	162	AT5G57520	ATZFP2,ZFP2	NOVEL	37/3402	198/30167	0.00140528	0.0176215	37	AT1G01230/AT1G02390/AT1G05620/AT1G11190/AT1G18210/AT1G30700/AT1G32450/AT1G54570/AT1G73220/AT1G76680/AT2G25460/AT2G31570/AT2G34610/AT2G35980/AT2G39200/AT2G43000/AT2G44300/AT2G46950/AT3G05400/AT3G10985/AT3G11340/AT3G56400/AT3G60670/AT4G01870/AT4G02380/AT4G15610/AT4G22330/AT4G23810/AT4G36040/AT5G24530/AT5G37600/AT5G44160/AT5G44610/AT5G52310/AT5G56870/AT5G62165/AT5G63130
GO:0010150	leaf senescence	163	AT4G36930	SPT	NOVEL	49/3403	198/30167	8e-08	3.12e-06	49	AT1G02390/AT1G11190/AT1G17020/AT1G20900/AT1G30700/AT1G31040/AT1G32450/AT1G54570/AT1G73220/AT1G73500/AT1G76680/AT1G76980/AT2G18690/AT2G25460/AT2G31570/AT2G34610/AT2G35980/AT2G37750/AT2G39200/AT2G42540/AT2G43000/AT2G44300/AT2G44480/AT2G46950/AT3G05400/AT3G11340/AT3G14060/AT3G22910/AT3G50760/AT3G56400/AT3G60670/AT4G01870/AT4G02380/AT4G10500/AT4G12735/AT4G15610/AT4G23810/AT4G32940/AT4G36040/AT5G24530…
GO:0010150	leaf senescence	164	AT5G48560	CIB2	NOVEL	52/3393	198/30167	3.38e-09	1.3e-07	52	AT1G02390/AT1G08050/AT1G11190/AT1G20900/AT1G30700/AT1G31040/AT1G32450/AT1G54130/AT1G54570/AT1G73220/AT1G73500/AT1G76680/AT1G76980/AT2G18690/AT2G22300/AT2G25460/AT2G25625/AT2G34610/AT2G35980/AT2G37750/AT2G39200/AT2G44300/AT2G44480/AT2G46950/AT3G05400/AT3G07350/AT3G11340/AT3G14060/AT3G22910/AT3G25882/AT3G29035/AT3G52430/AT3G56400/AT3G60670/AT4G01870/AT4G02380/AT4G10500/AT4G15610/AT4G23810/AT4G30490…
GO:0010150	leaf senescence	165	AT2G46830	AtCCA1,CCA1	NOVEL	56/3393	198/30167	3.95e-11	2.62e-09	56	AT1G01680/AT1G02390/AT1G21000/AT1G30700/AT1G32450/AT1G34420/AT1G36622/AT1G54570/AT1G66880/AT1G69490/AT1G73220/AT1G73500/AT1G76680/AT2G13810/AT2G18690/AT2G25460/AT2G25625/AT2G30550/AT2G34610/AT2G35980/AT2G37750/AT2G39200/AT2G39730/AT2G43000/AT2G44300/AT2G44480/AT2G46950/AT3G05400/AT3G14060/AT3G22910/AT3G25010/AT3G25882/AT3G28100/AT3G29035/AT3G52430/AT3G56400/AT3G60670/AT4G01250/AT4G01870/AT4G02380…
GO:0010150	leaf senescence	166	AT4G25410	AT4G25410	NOVEL	43/3382	198/30167	1.52e-05	0.000366457	43	AT1G02390/AT1G11190/AT1G20900/AT1G30700/AT1G31040/AT1G32450/AT1G54570/AT1G66830/AT1G73220/AT1G73500/AT1G76680/AT2G25460/AT2G25625/AT2G31570/AT2G34610/AT2G35980/AT2G39200/AT2G44300/AT2G46950/AT3G05400/AT3G07350/AT3G11340/AT3G14060/AT3G22910/AT3G56400/AT3G60670/AT4G01870/AT4G02380/AT4G10500/AT4G15610/AT4G18980/AT4G23810/AT4G32940/AT4G36040/AT5G03280/AT5G23950/AT5G24530/AT5G25930/AT5G44610/AT5G52300…
GO:0010150	leaf senescence	167	AT4G05100	AtMYB74,MYB74	NOVEL	47/3365	198/30167	3.9e-07	1.42e-05	47	AT1G01680/AT1G02390/AT1G11190/AT1G20180/AT1G21000/AT1G30700/AT1G31040/AT1G32450/AT1G36622/AT1G54570/AT1G73220/AT1G76680/AT1G76980/AT2G13810/AT2G18690/AT2G25460/AT2G25625/AT2G34610/AT2G35980/AT2G37750/AT2G39200/AT2G44300/AT2G44480/AT3G05400/AT3G10985/AT3G11340/AT3G25010/AT3G25882/AT3G29035/AT3G60670/AT4G01870/AT4G02380/AT4G10500/AT4G12735/AT4G15610/AT4G18980/AT4G23810/AT4G36040/AT5G24530/AT5G25930…
GO:0010150	leaf senescence	168	AT1G52520	FRS6	NOVEL	51/3372	198/30167	7.86e-09	3.7e-07	51	AT1G01680/AT1G02390/AT1G08050/AT1G11190/AT1G21000/AT1G30700/AT1G32450/AT1G34420/AT1G36622/AT1G54130/AT1G66830/AT1G66880/AT1G69490/AT1G73220/AT1G73500/AT1G73680/AT1G76680/AT1G76980/AT2G13790/AT2G13810/AT2G30550/AT2G31570/AT2G34610/AT2G35980/AT2G39200/AT2G44300/AT2G44480/AT2G46700/AT2G46950/AT3G05400/AT3G10500/AT3G10985/AT3G19190/AT3G25010/AT3G52430/AT4G01870/AT4G02380/AT4G03550/AT4G10500/AT4G18980…
GO:0010150	leaf senescence	169	AT2G41690	AT-HSFB3,HSFB3,HSFB3	NOVEL	38/3364	198/30167	0.000589186	0.00700902	38	AT1G02390/AT1G11190/AT1G20900/AT1G21000/AT1G30700/AT1G31040/AT1G32450/AT1G54570/AT1G73220/AT1G73500/AT1G76680/AT1G76980/AT2G13810/AT2G25460/AT2G31570/AT2G34610/AT2G37750/AT2G44300/AT2G46950/AT3G05400/AT3G07350/AT3G10985/AT3G11340/AT3G14060/AT3G60670/AT4G01870/AT4G02380/AT4G15610/AT4G32940/AT4G36040/AT5G25930/AT5G39050/AT5G44160/AT5G44610/AT5G52300/AT5G52310/AT5G62165/AT5G63130
GO:0010150	leaf senescence	170	AT4G36540	BEE2	NOVEL	43/3363	198/30167	1.33e-05	0.000478371	43	AT1G01680/AT1G11190/AT1G20180/AT1G21000/AT1G32450/AT1G36622/AT1G54040/AT1G66830/AT1G73220/AT1G73500/AT1G76680/AT2G13790/AT2G13810/AT2G18690/AT2G25625/AT2G30550/AT2G34610/AT2G35980/AT2G42540/AT2G43000/AT2G43570/AT2G44300/AT2G44480/AT2G46950/AT3G05400/AT3G11340/AT3G25010/AT3G25882/AT3G28100/AT3G60670/AT4G02380/AT4G32940/AT4G36040/AT5G24110/AT5G24530/AT5G25930/AT5G37600/AT5G44610/AT5G51720/AT5G52310…
GO:0010150	leaf senescence	171	AT3G57670	NTT,WIP2	NOVEL	37/3356	198/30167	0.00110027	0.0141528	37	AT1G11190/AT1G18210/AT1G20900/AT1G30700/AT1G31040/AT1G32450/AT1G54570/AT1G73220/AT1G73500/AT1G76680/AT2G25460/AT2G34610/AT2G35980/AT2G44300/AT2G44480/AT2G46950/AT3G05400/AT3G10985/AT3G11340/AT3G14060/AT3G22910/AT3G25882/AT3G56860/AT3G60670/AT4G01870/AT4G02380/AT4G10500/AT4G12735/AT4G15610/AT4G36040/AT5G24530/AT5G44160/AT5G44610/AT5G52300/AT5G52310/AT5G62165/AT5G63130
GO:0010150	leaf senescence	172	AT2G17770	ATBZIP27,BZIP27,FDP	NOVEL	38/3362	198/30167	0.000582515	0.00736523	38	AT1G02390/AT1G05620/AT1G11190/AT1G21000/AT1G30700/AT1G31040/AT1G32450/AT1G54570/AT1G73220/AT1G73500/AT1G76680/AT2G13810/AT2G25460/AT2G31570/AT2G34610/AT2G35980/AT2G37750/AT2G42540/AT2G44300/AT2G46950/AT3G05400/AT3G10985/AT3G11340/AT3G14060/AT3G25882/AT3G60670/AT4G01870/AT4G02380/AT4G15610/AT4G32940/AT4G36040/AT5G25930/AT5G39050/AT5G44160/AT5G44610/AT5G52310/AT5G62165/AT5G63130
GO:0010150	leaf senescence	173	AT1G55580	LAS,SCL18	NOVEL	38/3338	198/30167	0.00050756	0.00830223	38	AT1G11190/AT1G18210/AT1G21000/AT1G30700/AT1G31040/AT1G32450/AT1G54570/AT1G73220/AT1G73500/AT1G76680/AT1G76980/AT2G13810/AT2G25460/AT2G34610/AT2G37750/AT2G44300/AT2G46950/AT3G05400/AT3G10985/AT3G11340/AT3G14060/AT3G25882/AT3G60670/AT4G01870/AT4G02380/AT4G10500/AT4G15610/AT4G32940/AT4G36040/AT5G23950/AT5G35110/AT5G39050/AT5G44160/AT5G44610/AT5G52310/AT5G56870/AT5G62165/AT5G63130
GO:0010150	leaf senescence	174	AT5G25160	ZFP3	NOVEL	40/3346	198/30167	0.00012624	0.00210818	40	AT1G01680/AT1G02390/AT1G11190/AT1G30700/AT1G32450/AT1G54570/AT1G73220/AT1G73500/AT1G76680/AT1G76980/AT2G13810/AT2G25460/AT2G34610/AT2G35980/AT2G37750/AT2G39200/AT2G44300/AT2G46950/AT3G05400/AT3G07350/AT3G11340/AT3G14060/AT3G25882/AT3G60670/AT4G01870/AT4G02380/AT4G10500/AT4G15610/AT4G23810/AT4G32940/AT4G36040/AT5G24110/AT5G24530/AT5G44160/AT5G44610/AT5G52310/AT5G56870/AT5G59220/AT5G62165/AT5G63130
GO:0010150	leaf senescence	175	AT2G34140	CDF4	NOVEL	49/3357	198/30167	5.24e-08	1.87e-06	49	AT1G02390/AT1G20900/AT1G21000/AT1G30700/AT1G31040/AT1G32450/AT1G54570/AT1G69490/AT1G73220/AT1G73500/AT1G76680/AT1G76980/AT2G13810/AT2G25460/AT2G25625/AT2G31570/AT2G34610/AT2G35980/AT2G37750/AT2G39200/AT2G43000/AT2G44300/AT2G46950/AT3G05400/AT3G07350/AT3G11340/AT3G22910/AT3G25010/AT3G25882/AT3G56400/AT3G60670/AT4G01870/AT4G02380/AT4G15610/AT4G18980/AT4G23810/AT4G32940/AT4G36040/AT5G03280/AT5G23950…
GO:0010150	leaf senescence	176	AT1G18960	AT1G18960	NOVEL	37/3337	198/30167	0.000992411	0.0182137	37	AT1G01680/AT1G11190/AT1G20180/AT1G31040/AT1G73220/AT1G73500/AT1G76680/AT1G76980/AT2G13810/AT2G30550/AT2G34610/AT2G35980/AT2G39730/AT2G43000/AT2G44300/AT3G05400/AT3G07350/AT3G22910/AT3G25882/AT3G60670/AT4G01870/AT4G02380/AT4G10500/AT4G12735/AT4G23810/AT4G32940/AT4G36040/AT5G24110/AT5G24530/AT5G25930/AT5G35110/AT5G37600/AT5G44610/AT5G52310/AT5G56870/AT5G62165/AT5G63130
GO:0010150	leaf senescence	177	AT5G43170	AZF3,ZF3	NOVEL	41/3340	198/30167	5.65e-05	0.000990383	41	AT1G02390/AT1G18210/AT1G20900/AT1G30700/AT1G31040/AT1G32450/AT1G54570/AT1G73220/AT1G73500/AT1G76680/AT1G76980/AT2G13810/AT2G18690/AT2G25460/AT2G31570/AT2G34610/AT2G39200/AT2G43000/AT2G44300/AT2G44480/AT2G46950/AT3G05400/AT3G11340/AT3G22910/AT3G25010/AT3G25882/AT4G01870/AT4G02380/AT4G10500/AT4G12735/AT4G15610/AT4G18980/AT4G23810/AT4G32940/AT4G36040/AT5G25930/AT5G44610/AT5G52300/AT5G52310/AT5G62165…
GO:0010150	leaf senescence	178	AT2G20880	AtERF53,ERF53	NOVEL	61/3354	198/30167	5.19e-14	3.35e-12	61	AT1G01680/AT1G02390/AT1G08050/AT1G09176/AT1G11190/AT1G21000/AT1G30700/AT1G32450/AT1G34420/AT1G36622/AT1G54040/AT1G54130/AT1G66830/AT1G66880/AT1G68620/AT1G69490/AT1G73220/AT1G73500/AT1G76680/AT1G76980/AT2G13810/AT2G18690/AT2G22300/AT2G25460/AT2G25625/AT2G30550/AT2G34610/AT2G35980/AT2G39200/AT2G42540/AT2G44300/AT2G44480/AT3G07350/AT3G11340/AT3G14067/AT3G25010/AT3G25882/AT3G26210/AT3G29035/AT3G50760…
GO:0010150	leaf senescence	179	AT2G42430	ASL18,LBD16	NOVEL	35/3343	198/30167	0.00360043	0.0358869	35	AT1G02390/AT1G17020/AT1G20180/AT1G21000/AT1G30700/AT1G32450/AT1G54570/AT1G73220/AT1G73500/AT1G76680/AT1G76980/AT2G25460/AT2G34610/AT2G44300/AT2G46950/AT3G05400/AT3G07350/AT3G11340/AT3G14060/AT3G22910/AT3G56400/AT3G60670/AT4G01870/AT4G02380/AT4G10500/AT4G15610/AT4G32940/AT4G36040/AT5G24530/AT5G37600/AT5G39050/AT5G44160/AT5G44610/AT5G52310/AT5G63130
GO:0010150	leaf senescence	180	AT2G47520	AtERF71,ERF71,HRE2	NOVEL	42/3338	198/30167	2.52e-05	0.000577048	42	AT1G02390/AT1G11190/AT1G20180/AT1G30700/AT1G32450/AT1G36622/AT1G69490/AT1G73220/AT1G73500/AT1G76680/AT1G76980/AT2G13810/AT2G25460/AT2G31570/AT2G34610/AT2G39200/AT2G44300/AT3G05400/AT3G10985/AT3G11340/AT3G25882/AT3G60670/AT4G01250/AT4G01870/AT4G02380/AT4G10500/AT4G12735/AT4G14365/AT4G15610/AT4G23810/AT4G32940/AT4G36040/AT5G23950/AT5G24110/AT5G24530/AT5G25930/AT5G37600/AT5G39050/AT5G44610/AT5G52300…
GO:0010150	leaf senescence	181	AT4G37940	AGL21	NOVEL	42/3359	198/30167	2.92e-05	0.000581094	42	AT1G02390/AT1G05620/AT1G20180/AT1G30700/AT1G31040/AT1G32450/AT1G54570/AT1G69490/AT1G73220/AT1G73500/AT1G76680/AT1G76980/AT2G13810/AT2G25460/AT2G31570/AT2G34610/AT2G37750/AT2G39200/AT2G44300/AT2G44480/AT2G46950/AT3G05400/AT3G07350/AT3G11340/AT3G60670/AT4G01870/AT4G02380/AT4G10500/AT4G15610/AT4G23810/AT4G32940/AT4G36040/AT5G23950/AT5G24530/AT5G37600/AT5G39050/AT5G44160/AT5G44610/AT5G52310/AT5G56870…
GO:0010150	leaf senescence	182	AT5G65130	WIND4	NOVEL	42/3337	198/30167	2.5e-05	0.000549854	42	AT1G01680/AT1G02390/AT1G11190/AT1G18210/AT1G30700/AT1G36622/AT1G73220/AT1G73500/AT1G76680/AT1G76980/AT2G13810/AT2G18690/AT2G25460/AT2G31570/AT2G34610/AT2G35980/AT2G37750/AT2G39200/AT2G43000/AT2G44300/AT2G46950/AT3G05400/AT3G07350/AT3G10985/AT3G11340/AT3G25882/AT3G60670/AT4G01250/AT4G01870/AT4G02380/AT4G10500/AT4G15610/AT4G36040/AT5G24110/AT5G24530/AT5G25930/AT5G37600/AT5G44610/AT5G52310/AT5G56870…
GO:0010150	leaf senescence	183	AT4G39070	BBX20,BZS1,STH7	NOVEL	49/3334	198/30167	4.22e-08	1.86e-06	49	AT1G02390/AT1G11190/AT1G13990/AT1G20900/AT1G21000/AT1G30700/AT1G32450/AT1G36622/AT1G54130/AT1G54570/AT1G69490/AT1G73220/AT1G73500/AT1G76680/AT1G76980/AT2G25460/AT2G25625/AT2G31570/AT2G34610/AT2G37750/AT2G39200/AT2G39730/AT2G44300/AT2G44480/AT2G46950/AT3G05400/AT3G07350/AT3G10500/AT3G11340/AT3G14060/AT3G22910/AT3G25882/AT3G29035/AT3G60670/AT4G01250/AT4G01870/AT4G02380/AT4G15610/AT4G32940/AT4G36040…
GO:0010150	leaf senescence	184	AT5G57390	AIL5,CHO1,EMK,PLT5	NOVEL	37/3323	198/30167	0.000919027	0.0126231	37	AT1G02390/AT1G11190/AT1G17020/AT1G18210/AT1G20900/AT1G30700/AT1G31040/AT1G32450/AT1G54570/AT1G66830/AT1G73220/AT1G73500/AT1G76680/AT2G18690/AT2G25460/AT2G31570/AT2G34610/AT2G35980/AT2G46950/AT3G05400/AT3G11340/AT3G22910/AT3G60670/AT4G01870/AT4G02380/AT4G10500/AT4G12735/AT4G15610/AT4G23810/AT4G32940/AT4G36040/AT5G25930/AT5G44160/AT5G52300/AT5G52310/AT5G62165/AT5G63130
GO:0010150	leaf senescence	185	AT2G40740	ATWRKY55,WRKY55	NOVEL	54/3336	198/30167	2.06e-10	1.2e-08	54	AT1G01680/AT1G02390/AT1G09176/AT1G13990/AT1G20900/AT1G21000/AT1G30700/AT1G34420/AT1G54130/AT1G66830/AT1G66880/AT1G73220/AT1G73500/AT1G76680/AT2G13790/AT2G13810/AT2G18690/AT2G22300/AT2G25460/AT2G30550/AT2G34610/AT2G35980/AT2G44480/AT2G46950/AT3G11340/AT3G14067/AT3G25010/AT3G25882/AT3G26210/AT3G28100/AT3G29035/AT3G43230/AT3G50760/AT3G52430/AT3G60670/AT4G01870/AT4G02380/AT4G10500/AT4G12735/AT4G18980…
GO:0010150	leaf senescence	186	AT3G56980	BHLH039,bHLH39,ORG3	NOVEL	36/3319	198/30167	0.00172422	0.0202706	36	AT1G02390/AT1G09500/AT1G11190/AT1G30700/AT1G31040/AT1G32450/AT1G54570/AT1G73220/AT1G73500/AT1G76680/AT1G76980/AT2G13810/AT2G25460/AT2G34610/AT2G44300/AT3G05400/AT3G07350/AT3G11340/AT3G14060/AT3G22910/AT3G25882/AT3G60670/AT4G01870/AT4G02380/AT4G12735/AT4G15610/AT4G23810/AT4G32940/AT4G36040/AT5G24530/AT5G25930/AT5G44160/AT5G52310/AT5G56870/AT5G62165/AT5G63130
GO:0010150	leaf senescence	187	AT5G24930	ATCOL4,BBX5,COL4	NOVEL	61/3333	198/30167	3.92e-14	2.72e-12	61	AT1G01680/AT1G02230/AT1G02390/AT1G09176/AT1G21000/AT1G30700/AT1G32450/AT1G36622/AT1G54040/AT1G54130/AT1G66880/AT1G69490/AT1G73500/AT1G76680/AT2G13800/AT2G13810/AT2G18690/AT2G25460/AT2G25625/AT2G30550/AT2G34610/AT2G37750/AT2G39200/AT2G39730/AT2G42540/AT2G44300/AT2G46950/AT3G07350/AT3G11340/AT3G25010/AT3G25882/AT3G26210/AT3G29035/AT3G43230/AT3G48080/AT3G50760/AT3G56400/AT4G01250/AT4G01870/AT4G02380…
GO:0010150	leaf senescence	188	AT5G62000	ARF1-BP,ARF2,AtARF2,HSS,ORE14	KNOWN	59/3316	198/30167	4.07e-13	3.76e-11	59	AT1G01680/AT1G02390/AT1G08050/AT1G09176/AT1G20900/AT1G21000/AT1G30700/AT1G31040/AT1G32450/AT1G34420/AT1G36622/AT1G54130/AT1G54570/AT1G66830/AT1G66880/AT1G69490/AT1G73220/AT1G73500/AT1G76680/AT2G13790/AT2G13810/AT2G22300/AT2G25625/AT2G30550/AT2G31570/AT2G34610/AT2G35980/AT2G39200/AT2G39730/AT2G43000/AT2G43570/AT2G44300/AT2G44480/AT2G46950/AT3G05400/AT3G11340/AT3G25010/AT3G25882/AT3G43230/AT3G50760…
GO:0010150	leaf senescence	189	AT2G03710	AGL3,SEP4	NOVEL	52/3325	198/30167	1.68e-09	8.21e-08	52	AT1G01680/AT1G02390/AT1G09176/AT1G13990/AT1G21000/AT1G32450/AT1G34420/AT1G36622/AT1G54040/AT1G66830/AT1G66880/AT1G69490/AT1G73220/AT1G73500/AT1G76680/AT2G13810/AT2G18690/AT2G25460/AT2G25625/AT2G30550/AT2G31570/AT2G35980/AT2G44480/AT2G46950/AT3G10985/AT3G14067/AT3G25010/AT3G25882/AT3G26210/AT3G28100/AT3G29035/AT3G48080/AT3G50760/AT3G52430/AT3G56400/AT4G01870/AT4G10500/AT4G12735/AT4G18980/AT4G23810…
GO:0010150	leaf senescence	190	AT1G33760	ERF022	NOVEL	47/3313	198/30167	2.48e-07	1.06e-05	47	AT1G01680/AT1G02390/AT1G11190/AT1G13990/AT1G18210/AT1G21000/AT1G34420/AT1G66830/AT1G66880/AT1G73220/AT1G73500/AT1G76680/AT1G76980/AT2G13810/AT2G18690/AT2G22300/AT2G25460/AT2G30550/AT2G34610/AT2G35980/AT2G39200/AT2G44300/AT2G44480/AT2G46950/AT3G05400/AT3G22910/AT3G25010/AT3G25882/AT3G50760/AT3G52430/AT3G56400/AT3G60670/AT4G01250/AT4G01870/AT4G02380/AT4G23810/AT4G32940/AT4G36040/AT5G24110/AT5G24530…
GO:0010150	leaf senescence	191	AT5G16600	AtMYB43,MYB43	NOVEL	37/3294	198/30167	0.000782112	0.00903339	37	AT1G02390/AT1G11190/AT1G20900/AT1G30700/AT1G31040/AT1G32450/AT1G54570/AT1G73220/AT1G76680/AT1G76980/AT2G25460/AT2G25625/AT2G34610/AT2G37750/AT2G44300/AT2G46950/AT3G05400/AT3G07350/AT3G11340/AT3G14060/AT3G25010/AT3G60670/AT4G01870/AT4G02380/AT4G15610/AT4G32940/AT5G25930/AT5G35110/AT5G44160/AT5G44610/AT5G52300/AT5G52310/AT5G56870/AT5G59220/AT5G62165/AT5G63130/AT5G64940
GO:0010150	leaf senescence	192	AT5G18270	ANAC087	KNOWN	52/3288	198/30167	1.14e-09	4.3e-08	52	AT1G02390/AT1G11190/AT1G17020/AT1G20900/AT1G30700/AT1G31040/AT1G32450/AT1G54570/AT1G69490/AT1G73220/AT1G73500/AT1G76680/AT1G76980/AT2G13810/AT2G18690/AT2G25460/AT2G31570/AT2G34610/AT2G35980/AT2G37750/AT2G39200/AT2G44300/AT2G46950/AT3G05400/AT3G07350/AT3G11340/AT3G22910/AT3G25882/AT3G56400/AT3G60670/AT4G01870/AT4G02380/AT4G10500/AT4G12735/AT4G14370/AT4G15610/AT4G18980/AT4G23810/AT4G30490/AT4G32940…
GO:0010150	leaf senescence	193	AT4G00220	JLO,LBD30	NOVEL	44/3278	198/30167	2.94e-06	9.88e-05	44	AT1G02390/AT1G11190/AT1G13990/AT1G20900/AT1G30700/AT1G31040/AT1G32450/AT1G73220/AT1G73500/AT1G76680/AT1G76980/AT2G25460/AT2G30550/AT2G31570/AT2G34610/AT2G35980/AT2G37750/AT2G42540/AT2G44300/AT2G46950/AT3G05400/AT3G07350/AT3G10985/AT3G14060/AT3G25882/AT3G51130/AT3G54680/AT3G60670/AT4G01870/AT4G02380/AT4G10500/AT4G15610/AT4G18980/AT4G24590/AT4G32940/AT4G36040/AT5G25930/AT5G44160/AT5G44610/AT5G52300…
GO:0010150	leaf senescence	194	AT5G16770	AtMYB9,MYB9	NOVEL	52/3284	198/30167	1.09e-09	5.13e-08	52	AT1G02390/AT1G11190/AT1G18210/AT1G20900/AT1G21000/AT1G30700/AT1G31040/AT1G32450/AT1G54570/AT1G73220/AT1G73500/AT1G76680/AT1G76980/AT2G13810/AT2G25460/AT2G31570/AT2G34610/AT2G35980/AT2G37750/AT2G44300/AT2G44480/AT2G46950/AT3G05400/AT3G07350/AT3G10985/AT3G11340/AT3G14060/AT3G22910/AT3G25010/AT3G25882/AT3G54680/AT3G56400/AT3G56860/AT3G60670/AT4G01870/AT4G02380/AT4G10500/AT4G15610/AT4G18980/AT4G23810…
GO:0010150	leaf senescence	195	AT1G12890	AT1G12890	NOVEL	35/3257	198/30167	0.00235288	0.031449	35	AT1G01680/AT1G02390/AT1G11190/AT1G31040/AT1G32450/AT1G36622/AT1G54570/AT1G73220/AT1G73500/AT1G76680/AT2G13810/AT2G25460/AT2G34610/AT2G35980/AT2G43000/AT2G46950/AT3G05400/AT3G10985/AT3G25010/AT3G25882/AT4G01870/AT4G02380/AT4G10500/AT4G12735/AT4G32940/AT5G03280/AT5G24110/AT5G24530/AT5G25930/AT5G37600/AT5G44610/AT5G52300/AT5G52310/AT5G62000/AT5G62165
GO:0010150	leaf senescence	196	AT3G11020	DREB2,DREB2B	NOVEL	58/3269	198/30167	7.82e-13	3.96e-11	58	AT1G01680/AT1G02390/AT1G11190/AT1G13990/AT1G20900/AT1G21000/AT1G30700/AT1G32450/AT1G54570/AT1G66830/AT1G66880/AT1G69490/AT1G73220/AT1G73500/AT1G76680/AT1G76980/AT2G13810/AT2G18690/AT2G25460/AT2G25625/AT2G30550/AT2G31570/AT2G34610/AT2G37750/AT2G39200/AT2G43000/AT2G44300/AT2G44480/AT2G46950/AT3G05400/AT3G11340/AT3G14060/AT3G22910/AT3G25010/AT3G25882/AT3G56400/AT3G60670/AT4G01870/AT4G02380/AT4G10500…
GO:0010150	leaf senescence	197	AT2G18328	ATRL4,RL4	NOVEL	54/3269	198/30167	9.68e-11	7.44e-09	54	AT1G01680/AT1G02230/AT1G02390/AT1G09176/AT1G21000/AT1G32450/AT1G34420/AT1G36622/AT1G54040/AT1G54130/AT1G66830/AT1G66880/AT1G69490/AT1G76680/AT2G13800/AT2G13810/AT2G18690/AT2G22300/AT2G25460/AT2G34610/AT2G42540/AT2G44480/AT2G46950/AT3G05400/AT3G07350/AT3G10985/AT3G11340/AT3G14067/AT3G25010/AT3G25882/AT3G26210/AT3G43230/AT3G48080/AT3G56400/AT4G02380/AT4G10500/AT4G12735/AT4G14365/AT4G18980/AT4G23810…
GO:0010150	leaf senescence	198	AT5G47390	KUA1,MYBH	KNOWN	50/3265	198/30167	7.69e-09	3.69e-07	50	AT1G02390/AT1G08050/AT1G21000/AT1G30700/AT1G32450/AT1G36622/AT1G66830/AT1G66880/AT1G69490/AT1G73220/AT1G73500/AT1G76980/AT2G02710/AT2G13810/AT2G18690/AT2G25460/AT2G30550/AT2G31570/AT2G34610/AT2G35980/AT2G39200/AT2G44300/AT2G44480/AT2G46950/AT3G07350/AT3G11340/AT3G14067/AT3G25010/AT3G25882/AT3G29035/AT3G43230/AT3G52430/AT3G60670/AT4G01870/AT4G02380/AT4G10500/AT4G12735/AT4G18980/AT4G30490/AT4G32940…
GO:0010150	leaf senescence	199	AT5G24110	ATWRKY30,WRKY30	KNOWN	53/3236	198/30167	2.1e-10	9.64e-09	53	AT1G01680/AT1G02390/AT1G13990/AT1G21000/AT1G30700/AT1G32450/AT1G34420/AT1G36622/AT1G54130/AT1G66830/AT1G66880/AT1G69490/AT1G73220/AT1G73500/AT1G76680/AT1G76980/AT2G13810/AT2G18690/AT2G22300/AT2G25460/AT2G30550/AT2G31570/AT2G35980/AT2G39200/AT2G39730/AT2G43000/AT2G44480/AT3G25010/AT3G25882/AT3G26210/AT3G29035/AT3G43230/AT3G52430/AT3G56400/AT4G01250/AT4G01870/AT4G02380/AT4G10500/AT4G12735/AT4G14365…
GO:0010150	leaf senescence	200	AT4G11070	AtWRKY41,WRKY41	NOVEL	44/3222	198/30167	1.86e-06	7.18e-05	44	AT1G01680/AT1G02390/AT1G05620/AT1G11190/AT1G18210/AT1G21000/AT1G32450/AT1G34420/AT1G36622/AT1G66880/AT1G73220/AT1G73500/AT1G76680/AT1G76980/AT2G13810/AT2G25460/AT2G30550/AT2G31570/AT2G34610/AT2G43000/AT3G10985/AT3G22910/AT3G25010/AT3G25882/AT3G29035/AT3G50760/AT4G01250/AT4G01870/AT4G02380/AT4G10500/AT4G18980/AT4G23810/AT4G30490/AT4G32940/AT4G36040/AT5G24110/AT5G24530/AT5G25930/AT5G37600/AT5G39050…
GO:0010150	leaf senescence	201	AT4G13620	AT4G13620	NOVEL	41/3208	198/30167	2.24e-05	0.000444423	41	AT1G02390/AT1G05620/AT1G11190/AT1G20180/AT1G30700/AT1G32450/AT1G54570/AT1G73220/AT1G73500/AT1G76680/AT1G76980/AT2G13810/AT2G25460/AT2G31570/AT2G34610/AT2G37750/AT2G44300/AT2G44480/AT2G46950/AT3G05400/AT3G07350/AT3G11340/AT3G14060/AT3G56400/AT3G60670/AT4G01870/AT4G02380/AT4G15610/AT4G23810/AT4G32940/AT4G36040/AT5G24530/AT5G37600/AT5G39050/AT5G44160/AT5G44610/AT5G52300/AT5G52310/AT5G56870/AT5G62165…
GO:0010150	leaf senescence	202	AT5G06839	bZIP65,TGA10	NOVEL	40/3203	198/30167	4.86e-05	0.000968614	40	AT1G20180/AT1G21000/AT1G30700/AT1G32450/AT1G54570/AT1G73220/AT1G73500/AT1G76680/AT1G76980/AT2G13810/AT2G25460/AT2G31570/AT2G34610/AT2G37750/AT2G44480/AT2G46950/AT3G05400/AT3G07350/AT3G10985/AT3G11340/AT3G14060/AT3G25882/AT3G29035/AT3G54680/AT3G60670/AT4G01870/AT4G02380/AT4G15610/AT4G32940/AT4G36040/AT5G03280/AT5G24110/AT5G24530/AT5G37600/AT5G39050/AT5G44160/AT5G44610/AT5G52310/AT5G56870/AT5G63130
GO:0010150	leaf senescence	203	AT1G29860	ATWRKY71,EXB1,WRKY71	NOVEL	49/3210	198/30167	1.26e-08	6.23e-07	49	AT1G01680/AT1G02390/AT1G05620/AT1G11190/AT1G21000/AT1G30700/AT1G34420/AT1G36622/AT1G54130/AT1G54570/AT1G66880/AT1G73220/AT1G73500/AT1G76980/AT2G13810/AT2G22300/AT2G25460/AT2G30550/AT2G34610/AT2G35980/AT2G43000/AT2G44480/AT2G46950/AT3G11340/AT3G22910/AT3G25010/AT3G25882/AT3G28100/AT3G43230/AT3G52430/AT4G01870/AT4G02380/AT4G10500/AT4G12735/AT4G15610/AT4G18980/AT4G22750/AT4G32940/AT5G24110/AT5G24530…
GO:0010150	leaf senescence	204	AT2G34830	AtWRKY35,MEE24,WRKY35	NOVEL	41/3198	198/30167	2.08e-05	0.000440163	41	AT1G02390/AT1G05620/AT1G11190/AT1G20900/AT1G30700/AT1G32450/AT1G73220/AT1G73500/AT1G76680/AT1G76980/AT2G13810/AT2G25460/AT2G31570/AT2G34610/AT2G37750/AT2G43000/AT2G44300/AT2G46950/AT3G05400/AT3G11340/AT3G25882/AT3G60670/AT4G01870/AT4G02380/AT4G10500/AT4G15610/AT4G18980/AT4G23810/AT4G32940/AT4G36040/AT5G24110/AT5G24530/AT5G25930/AT5G37600/AT5G39050/AT5G44160/AT5G44610/AT5G52300/AT5G52310/AT5G62165…
GO:0010150	leaf senescence	205	AT2G22630	AGL17	NOVEL	43/3199	198/30167	3.78e-06	9.92e-05	43	AT1G02390/AT1G11190/AT1G20900/AT1G30700/AT1G31040/AT1G32450/AT1G54570/AT1G73220/AT1G73500/AT1G76680/AT1G76980/AT2G13810/AT2G25460/AT2G31570/AT2G34610/AT2G35980/AT2G37750/AT2G39200/AT2G43000/AT2G44300/AT2G46950/AT3G05400/AT3G10500/AT3G11340/AT3G22910/AT4G01870/AT4G02380/AT4G15610/AT4G18980/AT4G23810/AT4G30490/AT4G32940/AT5G03280/AT5G24110/AT5G24530/AT5G25930/AT5G39050/AT5G44160/AT5G44610/AT5G52300…
GO:0010150	leaf senescence	206	AT2G21900	ATWRKY59,WRKY59	NOVEL	41/3189	198/30167	1.95e-05	0.000537005	41	AT1G01680/AT1G08050/AT1G11190/AT1G21000/AT1G30700/AT1G54130/AT1G66830/AT1G66880/AT1G73220/AT1G73500/AT1G76680/AT1G76980/AT2G13810/AT2G22300/AT2G25460/AT2G30550/AT2G34610/AT2G39200/AT2G44300/AT2G46950/AT3G05400/AT3G07350/AT3G25010/AT3G25882/AT3G28100/AT3G43230/AT4G01870/AT4G02380/AT4G10500/AT4G12735/AT4G18980/AT4G32940/AT4G36040/AT5G24530/AT5G25930/AT5G39050/AT5G44610/AT5G52310/AT5G62000/AT5G62165…
GO:0010150	leaf senescence	207	AT5G65790	ATMYB68,MYB68	NOVEL	36/3186	198/30167	0.000836773	0.0105553	36	AT1G02390/AT1G11190/AT1G20900/AT1G30700/AT1G31040/AT1G32450/AT1G54570/AT1G69490/AT1G73220/AT1G73500/AT1G76680/AT1G76980/AT2G13810/AT2G25460/AT2G34610/AT2G37750/AT2G44300/AT3G05400/AT3G11340/AT3G25882/AT3G60670/AT4G01870/AT4G02380/AT4G15610/AT4G23810/AT4G32940/AT5G24110/AT5G24530/AT5G35110/AT5G44160/AT5G44610/AT5G52300/AT5G52310/AT5G56870/AT5G62165/AT5G63130
GO:0010150	leaf senescence	208	AT1G01010	ANAC001,NAC001,NTL10	NOVEL	54/3198	198/30167	4.24e-11	2.43e-09	54	AT1G01680/AT1G02390/AT1G08050/AT1G20900/AT1G21000/AT1G30700/AT1G31040/AT1G32450/AT1G54570/AT1G69490/AT1G73220/AT1G73500/AT1G76680/AT1G76980/AT2G13810/AT2G18690/AT2G22300/AT2G25460/AT2G25625/AT2G31570/AT2G34610/AT2G35980/AT2G37750/AT2G39200/AT2G39730/AT2G44300/AT2G44480/AT2G46950/AT3G05400/AT3G07350/AT3G10985/AT3G11340/AT3G14060/AT3G22910/AT3G25010/AT3G25882/AT3G56400/AT4G01870/AT4G02380/AT4G10500…
GO:0010150	leaf senescence	209	AT1G71520	AT1G71520	NOVEL	57/3195	198/30167	1.06e-12	6.8e-11	57	AT1G01680/AT1G02390/AT1G11190/AT1G18210/AT1G20180/AT1G21000/AT1G30700/AT1G32450/AT1G34420/AT1G36622/AT1G54570/AT1G66830/AT1G66880/AT1G73220/AT1G73500/AT1G76680/AT1G76980/AT2G13810/AT2G18690/AT2G25460/AT2G30550/AT2G31570/AT2G34610/AT2G35980/AT2G37750/AT2G39200/AT2G43000/AT2G44300/AT2G44480/AT2G46950/AT3G05400/AT3G07350/AT3G10500/AT3G11340/AT3G14060/AT3G22910/AT3G25010/AT3G25882/AT3G26210/AT3G52430…
GO:0010150	leaf senescence	210	AT1G18860	ATWRKY61,WRKY61	NOVEL	46/3179	198/30167	1.95e-07	7.43e-06	46	AT1G02390/AT1G05620/AT1G11190/AT1G20180/AT1G20900/AT1G30700/AT1G31040/AT1G32450/AT1G54570/AT1G73220/AT1G76680/AT1G76980/AT2G13810/AT2G18690/AT2G25460/AT2G31570/AT2G34610/AT2G35980/AT2G39200/AT2G43000/AT3G05400/AT3G10500/AT3G10985/AT3G11340/AT3G22910/AT3G29035/AT3G52430/AT3G54680/AT3G60670/AT4G01870/AT4G02380/AT4G12735/AT4G15610/AT4G18980/AT4G23810/AT4G32940/AT4G36040/AT5G24530/AT5G25930/AT5G37600…
GO:0010150	leaf senescence	211	AT5G61890	ERF114	NOVEL	45/3168	198/30167	4.64e-07	1.62e-05	45	AT1G01680/AT1G02390/AT1G09176/AT1G20180/AT1G21000/AT1G30700/AT1G32450/AT1G34420/AT1G66830/AT1G73220/AT1G73500/AT1G76680/AT1G76980/AT2G13810/AT2G18690/AT2G25460/AT2G25625/AT2G30550/AT2G34610/AT2G35980/AT2G43000/AT2G44300/AT2G44480/AT3G10985/AT3G22910/AT3G25010/AT3G25882/AT3G43230/AT3G60670/AT4G01870/AT4G02380/AT4G10500/AT4G12735/AT4G15610/AT4G18980/AT4G32940/AT4G36040/AT5G24110/AT5G24530/AT5G37600…
GO:0010150	leaf senescence	212	AT1G57560	AtMYB50,MYB50	NOVEL	40/3151	198/30167	3.36e-05	0.00064487	40	AT1G02390/AT1G21000/AT1G30700/AT1G31040/AT1G32450/AT1G54570/AT1G73500/AT1G76680/AT1G76980/AT2G13810/AT2G25460/AT2G25625/AT2G31570/AT2G34610/AT2G35980/AT2G44300/AT2G44480/AT2G46950/AT3G05400/AT3G11340/AT3G14060/AT3G25882/AT3G29035/AT3G60670/AT4G01870/AT4G02380/AT4G10500/AT4G12735/AT4G15610/AT4G18980/AT4G23810/AT4G32940/AT4G36040/AT5G24530/AT5G44160/AT5G44610/AT5G52300/AT5G52310/AT5G59220/AT5G63130
GO:0010150	leaf senescence	213	AT3G02310	AGL4,SEP2	NOVEL	37/3156	198/30167	0.000348068	0.00866408	37	AT1G01680/AT1G09176/AT1G11190/AT1G21000/AT1G31040/AT1G54130/AT1G54570/AT1G73220/AT1G73500/AT1G76680/AT2G13810/AT2G22300/AT2G25460/AT2G34610/AT2G35980/AT2G39200/AT2G44300/AT2G46950/AT3G05400/AT3G25010/AT3G25882/AT3G28100/AT3G60670/AT4G01870/AT4G02380/AT4G12735/AT4G18980/AT4G32940/AT5G24530/AT5G25930/AT5G37600/AT5G44610/AT5G52310/AT5G56870/AT5G62165/AT5G63130/AT5G64940
GO:0010150	leaf senescence	214	AT3G53600	ZAT18	NOVEL	54/3165	198/30167	2.86e-11	1.61e-09	54	AT1G01680/AT1G02390/AT1G08050/AT1G11190/AT1G21000/AT1G30700/AT1G32450/AT1G34420/AT1G54040/AT1G66880/AT1G73220/AT1G73500/AT1G76680/AT1G76980/AT2G13810/AT2G22300/AT2G25460/AT2G25625/AT2G30550/AT2G31570/AT2G34610/AT2G35980/AT2G39200/AT2G42540/AT2G43000/AT2G44300/AT2G44480/AT2G46950/AT3G10500/AT3G11340/AT3G22910/AT3G25010/AT3G25882/AT3G52430/AT3G56400/AT4G01250/AT4G01870/AT4G02380/AT4G10500/AT4G12735…
GO:0010150	leaf senescence	215	AT5G63790	ANAC102,NAC102	NOVEL	49/3178	198/30167	9.15e-09	3.01e-07	49	AT1G02390/AT1G08050/AT1G11190/AT1G13990/AT1G20900/AT1G30700/AT1G32450/AT1G64140/AT1G69490/AT1G73500/AT1G76680/AT1G76980/AT2G18690/AT2G25460/AT2G25625/AT2G31570/AT2G34610/AT2G35980/AT2G37750/AT2G39200/AT2G44300/AT2G46950/AT3G10500/AT3G10985/AT3G11340/AT3G14060/AT3G22910/AT3G25882/AT3G29035/AT3G56400/AT3G60670/AT4G01250/AT4G01870/AT4G02380/AT4G03550/AT4G10500/AT4G15610/AT4G23810/AT4G30490/AT4G32940…
GO:0010150	leaf senescence	216	AT2G24260	DROP1,LRL1	NOVEL	43/3147	198/30167	2.48e-06	6.46e-05	43	AT1G02390/AT1G11190/AT1G20900/AT1G30700/AT1G31040/AT1G32450/AT1G54570/AT1G69490/AT1G73220/AT1G73500/AT1G76680/AT2G13810/AT2G25460/AT2G31570/AT2G34610/AT2G37750/AT2G39200/AT2G44300/AT2G44480/AT2G46950/AT3G05400/AT3G11340/AT3G14060/AT3G50030/AT3G60670/AT4G01870/AT4G02380/AT4G12735/AT4G14370/AT4G15610/AT4G23810/AT4G32940/AT5G23950/AT5G24530/AT5G25930/AT5G39610/AT5G44160/AT5G44610/AT5G52300/AT5G52310…
GO:0010150	leaf senescence	217	AT2G22770	NAI1	NOVEL	36/3129	198/30167	0.000601851	0.00667289	36	AT1G02390/AT1G20900/AT1G30700/AT1G31040/AT1G32450/AT1G73220/AT1G76680/AT2G13810/AT2G25460/AT2G31570/AT2G34610/AT2G37750/AT2G39200/AT2G44300/AT2G46950/AT3G05400/AT3G11340/AT3G22910/AT3G25882/AT3G56400/AT3G60670/AT4G01870/AT4G02380/AT4G10500/AT4G12735/AT4G15610/AT4G23810/AT5G03280/AT5G24110/AT5G24530/AT5G25930/AT5G39050/AT5G44610/AT5G51720/AT5G52310/AT5G62165
GO:0010150	leaf senescence	218	AT2G45050	GATA2	NOVEL	37/3122	198/30167	0.000281981	0.00372297	37	AT1G02390/AT1G20900/AT1G30700/AT1G31040/AT1G32450/AT1G54570/AT1G69490/AT1G73220/AT1G73500/AT1G76680/AT2G18690/AT2G22300/AT2G25460/AT2G34610/AT2G35980/AT2G37750/AT2G43000/AT2G44300/AT2G46950/AT3G05400/AT3G11340/AT3G14060/AT3G22910/AT3G25010/AT3G60670/AT4G01870/AT4G02380/AT4G10500/AT4G15610/AT4G32940/AT5G24110/AT5G25930/AT5G39050/AT5G44610/AT5G52300/AT5G52310/AT5G62165
GO:0010150	leaf senescence	219	AT5G13910	LEP	NOVEL	39/3104	198/30167	5.4e-05	0.00106827	39	AT1G02390/AT1G05620/AT1G20900/AT1G30700/AT1G31040/AT1G32450/AT1G54570/AT1G73220/AT1G73500/AT1G76680/AT2G13810/AT2G25460/AT2G31570/AT2G34610/AT2G37750/AT2G43000/AT2G44300/AT2G46950/AT3G05400/AT3G07350/AT3G11340/AT3G22910/AT3G25882/AT3G60670/AT4G01870/AT4G02380/AT4G10500/AT4G15610/AT4G32940/AT4G36040/AT5G03280/AT5G23950/AT5G24530/AT5G39050/AT5G44160/AT5G44610/AT5G52300/AT5G52310/AT5G62165
GO:0010150	leaf senescence	220	AT3G02380	ATCOL2,BBX3,COL2	NOVEL	40/3094	198/30167	2.22e-05	0.000791364	40	AT1G01680/AT1G09176/AT1G21000/AT1G31040/AT1G32450/AT1G66830/AT1G73220/AT1G73500/AT1G76680/AT2G13810/AT2G22300/AT2G25625/AT2G34610/AT2G39730/AT2G44300/AT2G46950/AT3G05400/AT3G11340/AT3G19190/AT3G25010/AT3G25882/AT3G28100/AT3G29035/AT3G60670/AT4G01870/AT4G02380/AT4G03550/AT4G10500/AT4G12735/AT4G32940/AT4G36040/AT5G03280/AT5G24110/AT5G24530/AT5G25930/AT5G39610/AT5G52310/AT5G56870/AT5G62165/AT5G64940
GO:0010150	leaf senescence	221	AT3G16770	ATEBP,EBP,ERF72,RAP2.3	NOVEL	44/3115	198/30167	7.51e-07	2.66e-05	44	AT1G01680/AT1G02390/AT1G11190/AT1G20900/AT1G21000/AT1G32450/AT1G36622/AT1G54130/AT1G66830/AT1G69490/AT1G73220/AT1G73500/AT1G76680/AT2G13810/AT2G18690/AT2G22300/AT2G25460/AT2G25625/AT2G30550/AT2G34610/AT2G39200/AT2G44300/AT2G46950/AT3G05400/AT3G25010/AT3G25882/AT3G43230/AT3G50760/AT3G60670/AT4G01870/AT4G02380/AT4G10500/AT4G12735/AT4G23810/AT4G32940/AT4G36040/AT5G24110/AT5G24530/AT5G25930/AT5G37600…
GO:0010150	leaf senescence	222	AT3G51910	AT-HSFA7A,HSFA7A	NOVEL	47/3115	198/30167	3.92e-08	1.24e-06	47	AT1G02390/AT1G08050/AT1G11190/AT1G20900/AT1G30700/AT1G31040/AT1G32450/AT1G54570/AT1G69490/AT1G73220/AT1G73500/AT1G76680/AT2G18690/AT2G22300/AT2G25460/AT2G25625/AT2G31570/AT2G34610/AT2G35980/AT2G37750/AT2G39200/AT2G39730/AT2G43000/AT2G44480/AT2G46950/AT3G11340/AT3G43230/AT3G50030/AT3G56400/AT3G60670/AT4G01250/AT4G01870/AT4G02380/AT4G10500/AT4G15610/AT4G23810/AT4G32940/AT4G36040/AT5G25930/AT5G37600…
GO:0010150	leaf senescence	223	AT5G56960	AT5G56960	NOVEL	49/3111	198/30167	4.57e-09	2.32e-07	49	AT1G01680/AT1G02390/AT1G13990/AT1G18210/AT1G21000/AT1G34420/AT1G36622/AT1G66830/AT1G66880/AT1G73220/AT1G73500/AT1G76680/AT1G76980/AT2G13790/AT2G13810/AT2G22300/AT2G25460/AT2G25625/AT2G30550/AT2G35980/AT2G39200/AT2G43000/AT2G44480/AT2G46950/AT3G11340/AT3G14067/AT3G25010/AT3G25882/AT3G26210/AT3G28100/AT3G43230/AT3G50760/AT3G52430/AT4G01250/AT4G01870/AT4G02380/AT4G10500/AT4G23810/AT4G32940/AT4G36040…
GO:0010150	leaf senescence	224	AT1G13300	AtNIGT1,HRS1,NIGT1.4	NOVEL	39/3098	198/30167	5.18e-05	0.00092478	39	AT1G02390/AT1G11190/AT1G20900/AT1G30700/AT1G32450/AT1G73220/AT1G73500/AT1G76680/AT2G25460/AT2G31570/AT2G34610/AT2G35980/AT2G37750/AT2G39200/AT2G43000/AT2G44300/AT2G44480/AT2G46950/AT3G05400/AT3G11340/AT3G14060/AT3G56400/AT4G01870/AT4G02380/AT4G10500/AT4G15610/AT4G23810/AT4G32940/AT4G36040/AT5G23950/AT5G24110/AT5G24530/AT5G37600/AT5G39050/AT5G44160/AT5G44610/AT5G52310/AT5G56870/AT5G62165
GO:0010150	leaf senescence	225	AT4G30980	DROP2,LRL2	NOVEL	32/3095	198/30167	0.00650738	0.0480122	32	AT1G02390/AT1G11190/AT1G20900/AT1G30700/AT1G31040/AT1G32450/AT1G54570/AT1G73220/AT1G76680/AT1G76980/AT2G13810/AT2G34610/AT2G37750/AT2G39200/AT2G44300/AT2G44480/AT2G46950/AT3G05400/AT3G11340/AT3G60670/AT4G01870/AT4G02380/AT4G12735/AT4G15610/AT4G23810/AT4G32940/AT5G24530/AT5G44160/AT5G44610/AT5G52300/AT5G52310/AT5G62165
GO:0010150	leaf senescence	226	AT5G65080	AGL68,MAF5	NOVEL	36/3074	198/30167	0.000432784	0.00738999	36	AT1G11190/AT1G18210/AT1G21000/AT1G32450/AT1G54040/AT1G54570/AT1G73220/AT1G73500/AT1G76680/AT2G02710/AT2G13810/AT2G34610/AT2G35980/AT2G44300/AT2G46950/AT3G07350/AT3G25010/AT3G25882/AT3G52430/AT4G01870/AT4G02380/AT4G10500/AT4G12735/AT4G18980/AT4G23810/AT4G32940/AT4G36040/AT5G24110/AT5G24530/AT5G25930/AT5G37600/AT5G44160/AT5G44610/AT5G52310/AT5G56870/AT5G62165
GO:0010150	leaf senescence	227	AT1G79580	ANAC033,SMB,URP7	NOVEL	39/3077	198/30167	4.46e-05	0.000992558	39	AT1G02390/AT1G05620/AT1G11190/AT1G30700/AT1G32450/AT1G54570/AT1G73220/AT1G73500/AT1G76680/AT2G13810/AT2G22300/AT2G25460/AT2G34610/AT2G42540/AT2G43000/AT2G44300/AT2G46950/AT3G05400/AT3G22910/AT3G48020/AT3G56400/AT3G60670/AT4G01870/AT4G02380/AT4G15610/AT4G23810/AT4G32940/AT5G03280/AT5G23950/AT5G24530/AT5G25930/AT5G37600/AT5G39050/AT5G44160/AT5G44610/AT5G52310/AT5G56870/AT5G62165/AT5G63130
GO:0010150	leaf senescence	228	AT1G06180	ATMYB13,ATMYBLFGN,MYB13	NOVEL	38/3077	198/30167	9.87e-05	0.00210554	38	AT1G02390/AT1G11190/AT1G20900/AT1G30700/AT1G31040/AT1G32450/AT1G54570/AT1G69490/AT1G73220/AT1G73500/AT1G76680/AT2G13810/AT2G25460/AT2G34610/AT2G35980/AT2G37750/AT2G39200/AT2G44300/AT2G46950/AT3G05400/AT3G11340/AT3G14060/AT3G60670/AT4G01870/AT4G02380/AT4G10500/AT4G12735/AT4G15610/AT4G23810/AT4G32940/AT4G36040/AT5G24530/AT5G25930/AT5G44610/AT5G52300/AT5G52310/AT5G59220/AT5G62165
GO:0010150	leaf senescence	229	AT4G25400	AT4G25400	NOVEL	39/3080	198/30167	4.56e-05	0.000864928	39	AT1G02390/AT1G11190/AT1G30700/AT1G32450/AT1G73220/AT1G73500/AT1G76680/AT1G76980/AT2G13810/AT2G25460/AT2G30550/AT2G34610/AT2G37750/AT2G39200/AT2G44300/AT2G44480/AT2G46950/AT3G07350/AT3G11340/AT3G14060/AT3G56400/AT4G01870/AT4G02380/AT4G10500/AT4G15610/AT4G23810/AT4G32940/AT5G03280/AT5G24110/AT5G24530/AT5G25930/AT5G37600/AT5G39050/AT5G44160/AT5G44610/AT5G52300/AT5G52310/AT5G62165/AT5G63130
GO:0010150	leaf senescence	230	AT3G02550	LBD41	NOVEL	38/3067	198/30167	9.22e-05	0.001918	38	AT1G02390/AT1G11190/AT1G20900/AT1G30700/AT1G32450/AT1G54570/AT1G73220/AT1G76680/AT2G13810/AT2G18690/AT2G25460/AT2G31570/AT2G34610/AT2G35980/AT2G37750/AT2G39200/AT2G44300/AT2G44480/AT2G46950/AT3G05400/AT3G11340/AT3G14060/AT3G56860/AT3G60670/AT4G01870/AT4G02380/AT4G10500/AT4G15610/AT4G23810/AT4G32940/AT4G36040/AT5G23950/AT5G24530/AT5G25930/AT5G37600/AT5G44610/AT5G52310/AT5G62165
GO:0010150	leaf senescence	231	AT3G04070	ANAC047,NAC047,SHG,SHYG	NOVEL	46/3070	198/30167	7.01e-08	2.76e-06	46	AT1G02390/AT1G11190/AT1G18210/AT1G20900/AT1G21000/AT1G30700/AT1G32450/AT1G54570/AT1G73220/AT1G73500/AT1G76680/AT1G76980/AT2G13810/AT2G18690/AT2G25460/AT2G34610/AT2G35980/AT2G37750/AT2G43570/AT2G44300/AT2G44480/AT2G46950/AT3G05400/AT3G07350/AT3G10985/AT3G11340/AT3G25882/AT3G29035/AT3G54680/AT3G60670/AT4G01870/AT4G02380/AT4G10500/AT4G15610/AT4G18980/AT4G32940/AT4G36040/AT5G23950/AT5G24530/AT5G44160…
GO:0010150	leaf senescence	232	AT5G65050	AGL31,MAF2	NOVEL	45/3077	198/30167	2.04e-07	6.9e-06	45	AT1G02390/AT1G11190/AT1G21000/AT1G30700/AT1G31040/AT1G32450/AT1G54040/AT1G54130/AT1G54570/AT1G69490/AT1G73220/AT1G73500/AT1G76680/AT2G18690/AT2G25460/AT2G25625/AT2G30550/AT2G31570/AT2G34610/AT2G37750/AT2G39200/AT2G44300/AT2G46950/AT3G05400/AT3G14060/AT3G29035/AT3G56400/AT4G01870/AT4G02380/AT4G10500/AT4G15610/AT4G22750/AT4G23810/AT4G32940/AT4G36040/AT5G24530/AT5G25930/AT5G37600/AT5G39050/AT5G44160…
GO:0010150	leaf senescence	233	AT5G56200	AT5G56200	NOVEL	41/3058	198/30167	7.16e-06	0.00023427	41	AT1G05620/AT1G11190/AT1G30700/AT1G31040/AT1G32450/AT1G54570/AT1G66830/AT1G73220/AT1G73500/AT2G13810/AT2G25460/AT2G31570/AT2G34610/AT2G37750/AT2G44300/AT2G46950/AT3G05400/AT3G10500/AT3G10985/AT3G29035/AT3G54680/AT3G60670/AT4G01870/AT4G02380/AT4G10500/AT4G12735/AT4G15610/AT4G18980/AT4G32940/AT4G36040/AT5G24530/AT5G25930/AT5G37600/AT5G39050/AT5G44160/AT5G44610/AT5G52300/AT5G52310/AT5G56870/AT5G62165…
GO:0010150	leaf senescence	234	AT4G20970	AT4G20970	NOVEL	47/3063	198/30167	2.34e-08	1.34e-06	47	AT1G01680/AT1G02390/AT1G09176/AT1G13990/AT1G21000/AT1G34420/AT1G54130/AT1G66830/AT1G66880/AT1G73220/AT1G73500/AT1G76680/AT1G76980/AT2G13810/AT2G22300/AT2G25460/AT2G25625/AT2G30550/AT2G34610/AT2G35980/AT2G43000/AT2G44480/AT3G10985/AT3G14067/AT3G25010/AT3G25882/AT3G28100/AT3G50760/AT4G01870/AT4G02380/AT4G10500/AT4G12735/AT4G18980/AT4G23810/AT4G32940/AT5G24110/AT5G24530/AT5G25930/AT5G37600/AT5G39610…
GO:0010150	leaf senescence	235	AT5G60910	AGL8,FUL	NOVEL	47/3071	198/30167	2.53e-08	1.45e-06	47	AT1G01680/AT1G02390/AT1G09176/AT1G13990/AT1G21000/AT1G30700/AT1G32450/AT1G36622/AT1G54130/AT1G66830/AT1G66880/AT1G68620/AT1G73500/AT2G13810/AT2G22300/AT2G25460/AT2G25625/AT2G30550/AT2G43570/AT2G46950/AT3G14067/AT3G25010/AT3G25882/AT3G28100/AT3G43230/AT3G60670/AT4G01250/AT4G10500/AT4G12735/AT4G18980/AT4G23810/AT4G32940/AT4G34060/AT4G36040/AT5G24110/AT5G24530/AT5G25930/AT5G37600/AT5G39610/AT5G44610…
GO:0010150	leaf senescence	236	AT3G48160	DEL1,E2FE,E2L3	NOVEL	34/3054	198/30167	0.00152932	0.0173447	34	AT1G01680/AT1G02390/AT1G17020/AT1G20900/AT1G30700/AT1G31040/AT1G32450/AT1G73220/AT1G76680/AT2G13810/AT2G18690/AT2G31570/AT2G34610/AT2G35980/AT2G37750/AT2G39200/AT2G44300/AT2G46950/AT3G05400/AT3G11340/AT3G25882/AT3G56400/AT3G60670/AT4G01870/AT4G02380/AT4G10500/AT4G15610/AT4G23810/AT5G24110/AT5G25930/AT5G44610/AT5G52310/AT5G59220/AT5G62165
GO:0010150	leaf senescence	237	AT2G37430	ZAT11	NOVEL	60/3057	198/30167	3.02e-15	2.07e-13	60	AT1G01680/AT1G02390/AT1G11190/AT1G18210/AT1G21000/AT1G30700/AT1G31040/AT1G32450/AT1G34420/AT1G36622/AT1G73220/AT1G73500/AT1G76680/AT1G76980/AT2G13810/AT2G18690/AT2G22300/AT2G25460/AT2G31570/AT2G34610/AT2G35980/AT2G37750/AT2G39200/AT2G43000/AT2G44300/AT2G44480/AT2G46950/AT3G05400/AT3G10500/AT3G10985/AT3G11340/AT3G14060/AT3G22910/AT3G25010/AT3G25882/AT3G26210/AT3G48020/AT3G56400/AT3G60670/AT4G01870…
GO:0010150	leaf senescence	238	AT1G77450	anac032,NAC032	NOVEL	48/3055	198/30167	7.46e-09	2.95e-07	48	AT1G02390/AT1G08050/AT1G11190/AT1G17020/AT1G20900/AT1G21000/AT1G30700/AT1G31040/AT1G32450/AT1G54570/AT1G69490/AT1G73220/AT1G73500/AT1G76680/AT1G76980/AT2G18690/AT2G25460/AT2G25625/AT2G31570/AT2G34610/AT2G35980/AT2G37750/AT2G39200/AT2G44300/AT2G46950/AT3G05400/AT3G11340/AT3G14060/AT3G25882/AT3G50030/AT3G56400/AT3G60670/AT4G01870/AT4G02380/AT4G10500/AT4G12735/AT4G15610/AT4G18980/AT4G23810/AT4G32940…
GO:0010150	leaf senescence	239	AT5G43650	BHLH92	NOVEL	50/3052	198/30167	7.98e-10	3.76e-08	50	AT1G01680/AT1G02390/AT1G30700/AT1G32450/AT1G34420/AT1G36622/AT1G54040/AT1G66880/AT1G73220/AT1G73500/AT1G76680/AT1G76980/AT2G13810/AT2G18690/AT2G25460/AT2G30550/AT2G34610/AT2G35980/AT2G39200/AT2G43000/AT2G44300/AT2G44480/AT2G46950/AT3G22910/AT3G25010/AT3G25882/AT3G28100/AT3G50760/AT3G52430/AT3G56400/AT3G60670/AT4G01250/AT4G01870/AT4G02380/AT4G10500/AT4G12735/AT4G18980/AT4G23810/AT4G32940/AT4G36040…
GO:0010150	leaf senescence	240	AT4G05170	AT4G05170	NOVEL	41/3031	198/30167	5.77e-06	0.000163866	41	AT1G01680/AT1G02390/AT1G05620/AT1G30700/AT1G32450/AT1G54570/AT1G66830/AT1G69490/AT1G73220/AT1G73500/AT1G76680/AT1G76980/AT2G13810/AT2G25460/AT2G25625/AT2G31570/AT2G34610/AT2G37750/AT2G44300/AT2G44480/AT2G46950/AT3G05400/AT3G07350/AT3G10985/AT3G11340/AT3G25882/AT3G28100/AT3G52430/AT3G60670/AT4G01870/AT4G02380/AT4G15610/AT4G32940/AT4G36040/AT5G24530/AT5G44160/AT5G51720/AT5G52310/AT5G59220/AT5G62165…
GO:0010150	leaf senescence	241	AT2G38340	DREB19	NOVEL	47/3036	198/30167	1.78e-08	7.58e-07	47	AT1G02390/AT1G11190/AT1G21000/AT1G30700/AT1G32450/AT1G36622/AT1G54570/AT1G73220/AT1G73500/AT1G76680/AT1G76980/AT2G13810/AT2G18690/AT2G25460/AT2G30550/AT2G31570/AT2G34610/AT2G35980/AT2G37750/AT2G39200/AT2G43000/AT2G44300/AT2G44480/AT2G46950/AT3G10985/AT3G25882/AT3G54680/AT3G60670/AT4G01870/AT4G02380/AT4G10500/AT4G12735/AT4G15610/AT4G18980/AT4G23810/AT4G30490/AT4G32940/AT4G36040/AT5G24530/AT5G25930…
GO:0010150	leaf senescence	242	AT2G22760	AT2G22760	NOVEL	40/3030	198/30167	1.37e-05	0.000322546	40	AT1G01680/AT1G02390/AT1G20180/AT1G30700/AT1G66880/AT1G73220/AT1G73500/AT1G76680/AT1G76980/AT2G13810/AT2G18690/AT2G25460/AT2G30550/AT2G31570/AT2G34610/AT2G35980/AT2G39200/AT2G43000/AT2G44300/AT3G05400/AT3G22910/AT3G25010/AT3G25882/AT3G60670/AT4G01250/AT4G01870/AT4G02380/AT4G10500/AT4G12735/AT4G15610/AT4G18980/AT4G32940/AT4G36040/AT5G24110/AT5G24530/AT5G37600/AT5G52300/AT5G52310/AT5G62165/AT5G63130
GO:0010150	leaf senescence	243	AT5G16540	ZFN3	NOVEL	41/3027	198/30167	5.59e-06	0.000176937	41	AT1G01680/AT1G02390/AT1G09176/AT1G11190/AT1G21000/AT1G30700/AT1G31040/AT1G32450/AT1G36622/AT1G54570/AT1G73220/AT1G73500/AT1G76680/AT2G13810/AT2G31570/AT2G34610/AT2G35980/AT2G39200/AT2G39730/AT2G44300/AT2G44480/AT2G46950/AT3G05400/AT3G11340/AT3G19190/AT3G25010/AT3G60670/AT4G01870/AT4G02380/AT4G15610/AT4G23810/AT4G32940/AT4G36040/AT5G24110/AT5G24530/AT5G25930/AT5G37600/AT5G44610/AT5G52310/AT5G59220…
GO:0010150	leaf senescence	244	AT5G65230	AtMYB53,MYB53	NOVEL	35/3010	198/30167	0.000599199	0.0101598	35	AT1G02390/AT1G05620/AT1G11190/AT1G20900/AT1G30700/AT1G31040/AT1G32450/AT1G54570/AT1G73220/AT1G76680/AT2G13810/AT2G25460/AT2G31570/AT2G34610/AT2G37750/AT2G43000/AT2G44300/AT2G46950/AT3G05400/AT3G10985/AT3G11340/AT3G14060/AT3G25882/AT3G60670/AT4G02380/AT4G10500/AT4G15610/AT5G24530/AT5G25930/AT5G35110/AT5G44160/AT5G44610/AT5G52310/AT5G62165/AT5G63130
GO:0010150	leaf senescence	245	AT4G13480	AtMYB79,MYB79	NOVEL	41/3007	198/30167	4.75e-06	0.000180009	41	AT1G01680/AT1G02390/AT1G09176/AT1G13990/AT1G21000/AT1G54130/AT1G54570/AT1G73220/AT1G73500/AT1G76680/AT1G76980/AT2G13810/AT2G25460/AT2G30550/AT2G34610/AT2G44300/AT2G46950/AT3G07350/AT3G10985/AT3G25010/AT3G25882/AT3G50760/AT4G01870/AT4G02380/AT4G12735/AT4G32940/AT4G36040/AT5G23950/AT5G24110/AT5G24530/AT5G25930/AT5G37600/AT5G39050/AT5G44610/AT5G52300/AT5G52310/AT5G59220/AT5G62000/AT5G62165/AT5G63130…
GO:0010150	leaf senescence	246	AT1G13600	AtbZIP58,bZIP58	NOVEL	36/2981	198/30167	0.000241073	0.00415496	36	AT1G02390/AT1G20900/AT1G21000/AT1G30700/AT1G31040/AT1G32450/AT1G54570/AT1G73220/AT1G73500/AT1G76680/AT1G76980/AT2G13810/AT2G25460/AT2G34610/AT2G35980/AT2G37750/AT2G44300/AT2G44480/AT2G46950/AT3G05400/AT3G07350/AT3G10985/AT3G11340/AT3G14060/AT3G25882/AT3G60670/AT4G01870/AT4G02380/AT4G10500/AT4G15610/AT4G36040/AT5G24530/AT5G44160/AT5G52310/AT5G62165/AT5G63130
GO:0010150	leaf senescence	247	AT4G00390	AT4G00390	NOVEL	32/2987	198/30167	0.00385613	0.0463737	32	AT1G01680/AT1G02390/AT1G05620/AT1G11190/AT1G30700/AT1G54570/AT1G66830/AT1G73220/AT1G73500/AT1G76680/AT2G13810/AT2G30550/AT2G34610/AT2G35980/AT2G39200/AT2G43570/AT2G46950/AT3G11340/AT3G25882/AT3G29035/AT4G01870/AT4G12735/AT4G18980/AT4G32940/AT5G03280/AT5G25930/AT5G39050/AT5G52310/AT5G56870/AT5G59220/AT5G62165/AT5G63130
GO:0010150	leaf senescence	248	AT4G33280	AT4G33280	NOVEL	34/2981	198/30167	0.0010142	0.0168095	34	AT1G01680/AT1G02390/AT1G11190/AT1G31040/AT1G73220/AT1G73500/AT1G76680/AT1G76980/AT2G13810/AT2G25460/AT2G34610/AT2G44300/AT2G44480/AT2G46950/AT3G05400/AT3G10985/AT3G11340/AT3G14060/AT3G25882/AT4G01870/AT4G02380/AT4G15610/AT4G23810/AT4G32940/AT4G36040/AT5G24530/AT5G25930/AT5G39050/AT5G44160/AT5G44610/AT5G52310/AT5G56870/AT5G59220/AT5G62165
GO:0010150	leaf senescence	249	AT3G12820	AtMYB10,MYB10	NOVEL	34/2977	198/30167	0.000991037	0.0132138	34	AT1G11190/AT1G30700/AT1G32450/AT1G73220/AT1G73500/AT1G76680/AT2G25460/AT2G34610/AT2G44300/AT2G44480/AT2G46950/AT3G05400/AT3G10985/AT3G11340/AT3G25010/AT3G25882/AT3G60670/AT4G01870/AT4G02380/AT4G10500/AT4G15610/AT4G18980/AT4G23810/AT4G32940/AT4G36040/AT5G03280/AT5G25930/AT5G35110/AT5G39050/AT5G44160/AT5G44610/AT5G52300/AT5G52310/AT5G62165
GO:0010150	leaf senescence	250	AT4G25560	AtMYB18,LAF1,MYB18	NOVEL	35/2986	198/30167	0.000518139	0.00645266	35	AT1G02390/AT1G05620/AT1G11190/AT1G32450/AT1G54570/AT1G73220/AT1G73500/AT1G76680/AT2G13810/AT2G25460/AT2G31570/AT2G34610/AT2G37750/AT2G39200/AT2G44300/AT2G46950/AT3G05400/AT3G11340/AT3G22910/AT3G25010/AT3G29035/AT4G01870/AT4G02380/AT4G15610/AT4G32940/AT4G36040/AT5G24530/AT5G37600/AT5G39050/AT5G44160/AT5G44610/AT5G52310/AT5G56870/AT5G62165/AT5G63130
GO:0010150	leaf senescence	251	AT1G67310	AT1G67310	NOVEL	48/2994	198/30167	3.9e-09	2.19e-07	48	AT1G01680/AT1G08050/AT1G09176/AT1G13990/AT1G20180/AT1G21000/AT1G30700/AT1G32450/AT1G54130/AT1G54570/AT1G66830/AT1G66880/AT1G69490/AT1G73220/AT1G73500/AT1G76680/AT2G13810/AT2G22300/AT2G25460/AT2G30550/AT2G31570/AT2G34610/AT2G39200/AT2G44300/AT2G44480/AT2G46950/AT3G05400/AT3G10985/AT3G22910/AT3G25010/AT3G25882/AT3G43230/AT3G60670/AT4G01870/AT4G02380/AT4G10500/AT4G12735/AT4G18980/AT4G32940/AT5G24110…
GO:0010150	leaf senescence	252	AT3G46640	LUX,PCL1	NOVEL	44/3001	198/30167	2.69e-07	8.05e-06	44	AT1G02390/AT1G11190/AT1G20900/AT1G30700/AT1G31040/AT1G32450/AT1G54570/AT1G69490/AT1G73220/AT1G73500/AT1G76680/AT2G13810/AT2G22300/AT2G25460/AT2G34610/AT2G35980/AT2G37750/AT2G39200/AT2G43000/AT2G44300/AT2G44480/AT2G46950/AT3G05400/AT3G11340/AT3G14060/AT3G25882/AT3G50030/AT3G60670/AT4G01870/AT4G02380/AT4G10500/AT4G12735/AT4G15610/AT4G18980/AT4G23810/AT4G32940/AT5G24530/AT5G25930/AT5G44610/AT5G52300…
GO:0010150	leaf senescence	253	AT5G21960	AT5G21960	NOVEL	44/2986	198/30167	2.34e-07	8.41e-06	44	AT1G01680/AT1G02390/AT1G21000/AT1G32450/AT1G34420/AT1G36622/AT1G66830/AT1G66880/AT1G69490/AT1G73220/AT1G73500/AT1G76680/AT1G76980/AT2G13810/AT2G25625/AT2G30550/AT2G34610/AT2G35980/AT2G39200/AT2G43000/AT2G44300/AT2G44480/AT3G05400/AT3G25010/AT3G25882/AT3G26210/AT3G28100/AT3G50760/AT3G52430/AT4G01870/AT4G02380/AT4G10500/AT4G12735/AT4G15610/AT4G32940/AT4G36040/AT5G24110/AT5G24530/AT5G25930/AT5G52310…
GO:0010150	leaf senescence	254	AT3G07650	BBX7,COL9	NOVEL	45/2990	198/30167	8.91e-08	3.83e-06	45	AT1G02390/AT1G11190/AT1G20900/AT1G30700/AT1G31040/AT1G32450/AT1G36622/AT1G54570/AT1G69490/AT1G73220/AT1G73500/AT1G76680/AT2G13810/AT2G18690/AT2G25460/AT2G34610/AT2G37750/AT2G39200/AT2G44300/AT2G46950/AT3G05400/AT3G11340/AT3G14060/AT3G22910/AT3G25010/AT3G25882/AT3G56400/AT3G60670/AT4G01870/AT4G02380/AT4G10500/AT4G15610/AT4G18980/AT4G23810/AT4G32940/AT4G36040/AT5G24530/AT5G25930/AT5G37600/AT5G39050…
GO:0010150	leaf senescence	255	AT5G22570	ATWRKY38,WRKY38	NOVEL	53/2987	198/30167	1.06e-11	5.93e-10	53	AT1G01680/AT1G02390/AT1G09176/AT1G13990/AT1G18210/AT1G32450/AT1G34420/AT1G36622/AT1G54040/AT1G66830/AT1G66880/AT1G68620/AT1G69490/AT1G73220/AT1G73500/AT1G76680/AT2G13810/AT2G18690/AT2G25460/AT2G30550/AT2G31570/AT2G34610/AT2G35980/AT2G39200/AT2G44300/AT2G44480/AT3G22910/AT3G25010/AT3G25882/AT3G26210/AT3G29035/AT3G48020/AT3G50760/AT3G56400/AT4G01250/AT4G01870/AT4G02380/AT4G10500/AT4G14365/AT4G15610…
GO:0010150	leaf senescence	256	AT5G12870	ATMYB46,MYB46	NOVEL	34/2966	198/30167	0.000929716	0.00934999	34	AT1G02390/AT1G11190/AT1G17020/AT1G20900/AT1G30700/AT1G32450/AT1G36622/AT1G73220/AT1G73500/AT1G76680/AT1G76980/AT2G25460/AT2G31570/AT2G34610/AT2G37750/AT2G39200/AT2G44300/AT2G46950/AT3G05400/AT3G10985/AT3G11340/AT3G14060/AT3G25882/AT3G60670/AT4G01870/AT4G02380/AT4G15610/AT4G24590/AT4G32940/AT5G03280/AT5G44610/AT5G52310/AT5G59220/AT5G62165
GO:0010150	leaf senescence	257	AT1G46768	RAP2.1	NOVEL	46/2963	198/30167	2.42e-08	1.55e-06	46	AT1G01680/AT1G02390/AT1G08050/AT1G11190/AT1G21000/AT1G30700/AT1G32450/AT1G36622/AT1G54570/AT1G66830/AT1G69490/AT1G73220/AT1G73500/AT1G76680/AT1G76980/AT2G13810/AT2G25460/AT2G25625/AT2G30550/AT2G34610/AT2G35980/AT2G43000/AT2G44300/AT2G44480/AT2G46950/AT3G05400/AT3G25010/AT3G25882/AT3G28100/AT3G60670/AT4G01870/AT4G02380/AT4G10500/AT4G12735/AT4G32940/AT5G24110/AT5G24530/AT5G25930/AT5G39610/AT5G44610…
GO:0010150	leaf senescence	258	AT4G25480	ATCBF3,CBF3,DREB1A	NOVEL	47/2971	198/30167	9.05e-09	4.54e-07	47	AT1G01680/AT1G02390/AT1G11190/AT1G13990/AT1G21000/AT1G32450/AT1G54130/AT1G66830/AT1G66880/AT1G69490/AT1G73220/AT1G73500/AT1G76980/AT2G13810/AT2G22300/AT2G25460/AT2G25625/AT2G30550/AT2G34610/AT2G39200/AT2G43000/AT2G44300/AT2G46950/AT3G07350/AT3G14067/AT3G25010/AT3G25882/AT3G26210/AT3G43230/AT3G50760/AT3G52430/AT3G56400/AT4G01870/AT4G02380/AT4G10500/AT4G15610/AT4G23810/AT4G32940/AT4G36040/AT5G24110…
GO:0010150	leaf senescence	259	AT1G64100	AT1G64100	NOVEL	33/2959	198/30167	0.00175658	0.0220439	33	AT1G01680/AT1G02390/AT1G05620/AT1G11190/AT1G31040/AT1G32450/AT1G66830/AT1G73220/AT1G76680/AT2G13810/AT2G25460/AT2G34610/AT2G43000/AT2G44300/AT2G46950/AT3G05400/AT3G14060/AT3G25010/AT3G25882/AT3G60670/AT4G01870/AT4G02380/AT4G10500/AT4G12735/AT4G15610/AT4G32940/AT4G36040/AT5G24530/AT5G25930/AT5G52310/AT5G56870/AT5G62165/AT5G63130
GO:0010150	leaf senescence	260	AT1G62975	AT1G62975	NOVEL	44/2955	198/30167	1.74e-07	5.92e-06	44	AT1G02390/AT1G17020/AT1G21000/AT1G30700/AT1G31040/AT1G32450/AT1G34420/AT1G54570/AT1G73220/AT1G76680/AT1G76980/AT2G13810/AT2G18690/AT2G25460/AT2G31570/AT2G34610/AT2G35980/AT2G39200/AT2G39730/AT2G44300/AT2G44480/AT3G05400/AT3G10500/AT3G11340/AT3G14060/AT3G25010/AT3G25882/AT3G29035/AT3G60670/AT4G01870/AT4G02380/AT4G10500/AT4G12735/AT4G15610/AT5G24110/AT5G24530/AT5G25930/AT5G37600/AT5G39050/AT5G44610…
GO:0010150	leaf senescence	261	AT5G14340	AtMYB40,MYB40	NOVEL	39/2961	198/30167	1.89e-05	0.000432948	39	AT1G02230/AT1G02390/AT1G11190/AT1G20180/AT1G30700/AT1G32450/AT1G54570/AT1G73220/AT1G73500/AT1G76680/AT1G76980/AT2G25460/AT2G25625/AT2G34610/AT2G37750/AT2G44300/AT2G46950/AT3G05400/AT3G07350/AT3G11340/AT3G25010/AT4G01870/AT4G02380/AT4G12735/AT4G15610/AT4G23810/AT4G32940/AT4G36040/AT5G24530/AT5G35110/AT5G39050/AT5G44160/AT5G44610/AT5G52300/AT5G52310/AT5G56870/AT5G62000/AT5G62165/AT5G63130
GO:0010150	leaf senescence	262	AT5G55020	ATMYB120,MYB120	NOVEL	44/2953	198/30167	1.71e-07	1.03e-05	44	AT1G01680/AT1G02390/AT1G11190/AT1G13990/AT1G31040/AT1G73220/AT1G73500/AT1G76680/AT1G76980/AT2G13810/AT2G22300/AT2G25460/AT2G30550/AT2G34610/AT2G35980/AT2G39730/AT2G43000/AT2G44300/AT2G44480/AT2G46950/AT3G05400/AT3G11340/AT3G14067/AT3G22910/AT3G25010/AT3G25882/AT3G50760/AT3G60670/AT4G01870/AT4G02380/AT4G10500/AT4G12735/AT4G32940/AT5G24530/AT5G25930/AT5G35110/AT5G37600/AT5G39050/AT5G44610/AT5G52300…
GO:0010150	leaf senescence	263	AT4G27950	CRF4	NOVEL	39/2956	198/30167	1.82e-05	0.000426502	39	AT1G01680/AT1G02390/AT1G20900/AT1G30700/AT1G31040/AT1G32450/AT1G54570/AT1G69490/AT1G73220/AT1G73500/AT1G76680/AT2G18690/AT2G25460/AT2G31570/AT2G34610/AT2G35980/AT2G37750/AT2G42540/AT2G44300/AT2G46950/AT3G05400/AT3G11340/AT3G25010/AT3G25882/AT3G56860/AT3G60670/AT4G01870/AT4G02380/AT4G15610/AT4G18980/AT4G23810/AT4G32940/AT5G25930/AT5G44610/AT5G52300/AT5G52310/AT5G59220/AT5G62165/AT5G63130
GO:0010150	leaf senescence	264	AT1G30650	AR411,ATWRKY14,WRKY14	NOVEL	37/2938	198/30167	8.31e-05	0.00143966	37	AT1G02390/AT1G11190/AT1G20900/AT1G30700/AT1G32450/AT1G73220/AT1G73500/AT1G76680/AT1G76980/AT2G13810/AT2G25460/AT2G34610/AT2G39200/AT2G44300/AT2G46950/AT3G05400/AT3G11340/AT3G48020/AT3G60670/AT4G01870/AT4G02380/AT4G10500/AT4G12735/AT4G15610/AT4G23810/AT4G32940/AT4G36040/AT5G24110/AT5G24530/AT5G25930/AT5G37600/AT5G39050/AT5G44610/AT5G52300/AT5G52310/AT5G62165/AT5G63130
GO:0010150	leaf senescence	265	AT3G22100	AT3G22100	NOVEL	37/2943	198/30167	8.61e-05	0.00250472	37	AT1G02390/AT1G05620/AT1G11190/AT1G18210/AT1G30700/AT1G32450/AT1G73220/AT1G73500/AT1G76680/AT2G25460/AT2G31570/AT2G34610/AT2G35980/AT2G46950/AT3G05400/AT3G07350/AT3G10985/AT3G25882/AT3G29035/AT3G54680/AT4G01870/AT4G02380/AT4G10500/AT4G15610/AT4G23810/AT4G32940/AT4G36040/AT5G24530/AT5G25930/AT5G37600/AT5G44160/AT5G44610/AT5G52310/AT5G56870/AT5G62000/AT5G62165/AT5G63130
GO:0010150	leaf senescence	266	AT5G64750	ABR1	NOVEL	47/2950	198/30167	7.24e-09	3.44e-07	47	AT1G01680/AT1G02390/AT1G11190/AT1G18210/AT1G21000/AT1G30700/AT1G32450/AT1G34420/AT1G66830/AT1G73220/AT1G73500/AT1G76680/AT1G76980/AT2G22300/AT2G25460/AT2G30550/AT2G35980/AT2G39200/AT2G43000/AT2G43570/AT2G44300/AT2G44480/AT2G46950/AT3G05400/AT3G10500/AT3G10985/AT3G11340/AT3G22910/AT3G25010/AT3G25882/AT4G01250/AT4G01870/AT4G02380/AT4G10500/AT4G12735/AT4G15610/AT4G18980/AT4G23810/AT4G32940/AT5G24530…
GO:0010150	leaf senescence	267	AT1G74840	AT1G74840	NOVEL	45/2941	198/30167	5.5e-08	2.29e-06	45	AT1G01680/AT1G02390/AT1G11190/AT1G20900/AT1G30700/AT1G31040/AT1G32450/AT1G54570/AT1G64140/AT1G69490/AT1G73220/AT1G73500/AT1G76680/AT2G13810/AT2G18690/AT2G22300/AT2G25625/AT2G31570/AT2G34610/AT2G35980/AT2G37750/AT2G39200/AT2G44300/AT2G44480/AT2G46950/AT3G05400/AT3G11340/AT3G25010/AT3G25882/AT3G60670/AT4G01870/AT4G02380/AT4G10500/AT4G15610/AT4G18980/AT4G32940/AT5G24110/AT5G24530/AT5G25930/AT5G37600…
GO:0010150	leaf senescence	268	AT5G51790	AT5G51790	NOVEL	33/2931	198/30167	0.00150358	0.015537	33	AT1G01680/AT1G02390/AT1G30700/AT1G32450/AT1G54570/AT1G73220/AT1G73500/AT1G76680/AT2G13810/AT2G25460/AT2G34610/AT2G44300/AT2G46950/AT3G05400/AT3G07350/AT3G11340/AT3G14060/AT3G22910/AT3G56400/AT3G60670/AT4G01870/AT4G02380/AT4G15610/AT4G18980/AT4G23810/AT4G32940/AT4G36040/AT5G44160/AT5G44610/AT5G52310/AT5G56870/AT5G59220/AT5G62165
GO:0010150	leaf senescence	269	AT3G46090	ZAT7	NOVEL	51/2921	198/30167	5.31e-11	2.5e-09	51	AT1G01680/AT1G02390/AT1G09176/AT1G18210/AT1G21000/AT1G30700/AT1G32450/AT1G34420/AT1G36622/AT1G54040/AT1G66830/AT1G66880/AT1G73220/AT1G73500/AT1G76680/AT2G13810/AT2G18690/AT2G22300/AT2G25460/AT2G31570/AT2G34610/AT2G39200/AT2G44300/AT2G44480/AT3G05400/AT3G10985/AT3G22910/AT3G25010/AT3G25882/AT3G26210/AT3G50760/AT3G52430/AT3G56400/AT3G60670/AT4G01250/AT4G01870/AT4G02380/AT4G10500/AT4G12735/AT4G15610…
GO:0010150	leaf senescence	270	AT1G71692	AGL12,XAL1	NOVEL	31/2908	198/30167	0.00479539	0.0449148	31	AT1G20180/AT1G20900/AT1G30700/AT1G32450/AT1G54570/AT1G73220/AT1G73500/AT1G76680/AT1G76980/AT2G13810/AT2G25460/AT2G34610/AT2G44300/AT2G46950/AT3G05400/AT3G07350/AT3G11340/AT3G56400/AT4G01870/AT4G02380/AT4G15610/AT4G23810/AT4G32940/AT4G36040/AT5G35110/AT5G39050/AT5G44160/AT5G52300/AT5G52310/AT5G62165/AT5G63130
GO:0010150	leaf senescence	271	AT1G28360	ATERF12,ERF12	NOVEL	32/2901	198/30167	0.00246521	0.0278662	32	AT1G02390/AT1G21000/AT1G30700/AT1G31040/AT1G32450/AT1G69490/AT1G73220/AT1G73500/AT1G76680/AT2G13810/AT2G18690/AT2G25460/AT2G34610/AT2G37750/AT2G43000/AT2G44300/AT3G05400/AT3G10985/AT3G11340/AT3G14060/AT3G60670/AT4G01870/AT4G02380/AT4G12735/AT4G15610/AT4G32940/AT4G36040/AT5G24530/AT5G44160/AT5G52310/AT5G62165/AT5G63130
GO:0010150	leaf senescence	272	AT4G31620	REM36	NOVEL	45/2909	198/30167	3.98e-08	2.91e-06	45	AT1G01680/AT1G05620/AT1G11190/AT1G13990/AT1G20900/AT1G32450/AT1G36622/AT1G54130/AT1G54570/AT1G66830/AT1G66880/AT1G69490/AT1G73220/AT1G73500/AT1G76680/AT2G13810/AT2G18690/AT2G22300/AT2G25460/AT2G34610/AT2G42540/AT2G44300/AT3G14060/AT3G25882/AT3G29035/AT3G54680/AT3G56400/AT3G56860/AT4G01870/AT4G02380/AT4G15610/AT4G18980/AT4G23810/AT4G32940/AT4G36040/AT5G03280/AT5G24110/AT5G25930/AT5G37600/AT5G44160…
GO:0010150	leaf senescence	273	AT2G02540	ATHB21,HB21,ZFHD4,ZHD3	NOVEL	36/2891	198/30167	0.000132174	0.00236134	36	AT1G01680/AT1G11190/AT1G17020/AT1G20900/AT1G30700/AT1G31040/AT1G32450/AT1G73220/AT1G76680/AT2G13810/AT2G25460/AT2G30550/AT2G31570/AT2G34610/AT2G35980/AT2G37750/AT2G39730/AT2G44300/AT2G46950/AT3G05400/AT3G10985/AT3G14060/AT3G51130/AT3G60670/AT4G01870/AT4G02380/AT4G10500/AT4G15610/AT4G24590/AT4G32940/AT5G03280/AT5G24530/AT5G44610/AT5G52310/AT5G56870/AT5G62165
GO:0010150	leaf senescence	274	AT1G10480	ZFP5	NOVEL	41/2886	198/30167	1.7e-06	5.31e-05	41	AT1G02390/AT1G11190/AT1G30700/AT1G32450/AT1G73220/AT1G73500/AT1G76680/AT1G76980/AT2G13810/AT2G25460/AT2G30550/AT2G34610/AT2G35980/AT2G37750/AT2G39200/AT2G43000/AT2G44300/AT3G05400/AT3G07350/AT3G11340/AT3G25882/AT3G29035/AT3G56400/AT3G60670/AT4G01870/AT4G02380/AT4G10500/AT4G15610/AT4G23810/AT4G32940/AT4G36040/AT5G23950/AT5G24110/AT5G24530/AT5G25930/AT5G37600/AT5G44610/AT5G52300/AT5G52310/AT5G62165…
GO:0010150	leaf senescence	275	AT5G25830	GATA12	NOVEL	37/2891	198/30167	5.94e-05	0.00111455	37	AT1G02390/AT1G17020/AT1G20900/AT1G30700/AT1G32450/AT1G54570/AT1G73220/AT1G76680/AT2G25460/AT2G31570/AT2G34610/AT2G35980/AT2G37750/AT2G39200/AT2G44300/AT2G46950/AT3G05400/AT3G11340/AT3G14060/AT3G22910/AT3G60670/AT4G01870/AT4G02380/AT4G10500/AT4G12735/AT4G15610/AT4G32940/AT5G23950/AT5G24530/AT5G25930/AT5G44160/AT5G44610/AT5G52300/AT5G52310/AT5G62165/AT5G63130/AT5G64940
GO:0010150	leaf senescence	276	AT1G66600	ABO3,ATWRKY63,WRKY63	NOVEL	40/2867	198/30167	3.66e-06	0.000113936	40	AT1G01680/AT1G02390/AT1G11190/AT1G18210/AT1G21000/AT1G32450/AT1G66830/AT1G73220/AT1G73500/AT1G76680/AT1G76980/AT2G13810/AT2G25460/AT2G30550/AT2G34610/AT2G35980/AT2G37750/AT2G43000/AT2G43570/AT2G44300/AT2G46950/AT3G10985/AT3G25010/AT3G25882/AT4G01250/AT4G01870/AT4G02380/AT4G10500/AT4G12735/AT4G32940/AT4G36040/AT5G24110/AT5G24530/AT5G25930/AT5G35110/AT5G39050/AT5G52310/AT5G56870/AT5G62165/AT5G63130
GO:0010150	leaf senescence	277	AT4G16610	AT4G16610	NOVEL	34/2860	198/30167	0.000489794	0.00628924	34	AT1G02390/AT1G11190/AT1G20900/AT1G30700/AT1G31040/AT1G32450/AT1G54570/AT1G73220/AT1G73500/AT1G76680/AT2G25460/AT2G31570/AT2G34610/AT2G37750/AT2G39200/AT2G44300/AT2G46950/AT3G05400/AT3G11340/AT3G14060/AT3G25010/AT3G60670/AT4G01870/AT4G02380/AT4G10500/AT4G15610/AT4G23810/AT4G32940/AT5G25930/AT5G44610/AT5G52300/AT5G52310/AT5G56870/AT5G62165
GO:0010150	leaf senescence	278	AT2G24681	AT2G24681	NOVEL	32/2866	198/30167	0.00203804	0.0287555	32	AT1G01680/AT1G02390/AT1G11190/AT1G21000/AT1G31040/AT1G66830/AT1G73220/AT1G73500/AT1G76680/AT1G76980/AT2G13810/AT2G22300/AT2G25460/AT2G25625/AT2G30550/AT2G44300/AT2G44480/AT3G22910/AT3G25882/AT3G50760/AT4G02380/AT4G18980/AT4G32940/AT4G36040/AT5G24530/AT5G25930/AT5G39050/AT5G52310/AT5G56870/AT5G62165/AT5G63130/AT5G64230
GO:0010150	leaf senescence	279	AT4G37730	AtbZIP7,bZIP7	NOVEL	33/2887	198/30167	0.00117016	0.011573	33	AT1G02390/AT1G20900/AT1G30700/AT1G31040/AT1G32450/AT1G54570/AT1G73220/AT1G73500/AT1G76680/AT1G76980/AT2G13810/AT2G25460/AT2G34610/AT2G35980/AT2G37750/AT2G44300/AT2G46950/AT3G05400/AT3G11340/AT3G14060/AT3G22910/AT3G60670/AT4G01870/AT4G02380/AT4G15610/AT4G32940/AT5G25930/AT5G44160/AT5G44610/AT5G52300/AT5G52310/AT5G59220/AT5G62165
GO:0010150	leaf senescence	280	AT2G47190	ATMYB2,MYB2	NOVEL	45/2863	198/30167	2.48e-08	8.95e-07	45	AT1G01680/AT1G02390/AT1G09176/AT1G32450/AT1G34420/AT1G36622/AT1G54130/AT1G66830/AT1G66880/AT1G69490/AT1G73220/AT1G73500/AT1G76680/AT2G13810/AT2G18690/AT2G22300/AT2G31570/AT2G34610/AT2G35980/AT2G39200/AT2G43000/AT2G44300/AT2G44480/AT2G46950/AT3G05400/AT3G15534/AT3G22910/AT3G25010/AT3G25882/AT3G43230/AT3G52430/AT4G01870/AT4G02380/AT4G10500/AT4G12735/AT4G18980/AT4G23810/AT4G32940/AT5G24110/AT5G24530…
GO:0010150	leaf senescence	281	AT2G30340	LBD13	NOVEL	33/2854	198/30167	0.00096456	0.011029	33	AT1G02390/AT1G11190/AT1G30700/AT1G32450/AT1G73220/AT1G73500/AT1G76680/AT1G76980/AT2G13810/AT2G25460/AT2G34610/AT2G37750/AT2G43000/AT2G44300/AT2G46950/AT3G05400/AT3G11340/AT3G60670/AT4G01870/AT4G02380/AT4G15610/AT4G23810/AT4G32940/AT5G03280/AT5G24110/AT5G24530/AT5G25930/AT5G39050/AT5G44160/AT5G44610/AT5G52310/AT5G62165/AT5G63130
GO:0010150	leaf senescence	282	AT3G24310	ATMYB71,MYB305	NOVEL	34/2854	198/30167	0.000471676	0.00910859	34	AT1G01680/AT1G11190/AT1G21000/AT1G32450/AT1G73220/AT1G73500/AT1G76680/AT1G76980/AT2G13810/AT2G25460/AT2G34610/AT2G35980/AT2G43000/AT2G44300/AT2G46950/AT3G05400/AT3G07350/AT3G10985/AT3G25010/AT3G25882/AT4G01870/AT4G02380/AT4G15610/AT4G23810/AT4G32940/AT4G36040/AT5G24110/AT5G24530/AT5G35110/AT5G39050/AT5G44160/AT5G52310/AT5G62165/AT5G63130
GO:0010150	leaf senescence	283	AT5G57660	ATCOL5,BBX6,COL5	NOVEL	59/2865	198/30167	6.47e-16	5.22e-14	59	AT1G01680/AT1G02390/AT1G13990/AT1G21000/AT1G30700/AT1G32450/AT1G54040/AT1G54130/AT1G66830/AT1G66880/AT1G69490/AT1G73500/AT1G76680/AT2G13810/AT2G18690/AT2G22300/AT2G25460/AT2G25625/AT2G30550/AT2G31570/AT2G35980/AT2G37750/AT2G39200/AT2G43000/AT2G44300/AT2G46950/AT3G07350/AT3G11340/AT3G14067/AT3G25010/AT3G25882/AT3G26210/AT3G29035/AT3G43230/AT3G50760/AT3G52430/AT3G56400/AT4G01250/AT4G01870/AT4G02380…
GO:0010150	leaf senescence	284	AT3G60490	ERF35	NOVEL	35/2840	198/30167	0.000203158	0.00317595	35	AT1G02390/AT1G09176/AT1G11190/AT1G30700/AT1G32450/AT1G54570/AT1G73220/AT1G73500/AT1G76680/AT2G13810/AT2G25460/AT2G34610/AT2G35980/AT2G44300/AT2G46950/AT3G05400/AT3G07350/AT3G11340/AT3G14060/AT3G56400/AT3G60670/AT4G01870/AT4G02380/AT4G15610/AT4G18980/AT4G23810/AT4G32940/AT5G23950/AT5G24530/AT5G25930/AT5G44160/AT5G52310/AT5G59220/AT5G62165/AT5G63130
GO:0010150	leaf senescence	285	AT3G23240	AtERF#092,ERF1,ERF1B	NOVEL	45/2832	198/30167	1.79e-08	6.76e-07	45	AT1G01680/AT1G02390/AT1G09176/AT1G21000/AT1G32450/AT1G34420/AT1G36622/AT1G66830/AT1G66880/AT1G69490/AT1G73220/AT1G73500/AT1G76680/AT2G13790/AT2G13810/AT2G18690/AT2G22300/AT2G25460/AT2G25625/AT2G35980/AT2G43000/AT3G05400/AT3G10985/AT3G22910/AT3G25010/AT3G25882/AT3G52430/AT4G01250/AT4G01870/AT4G02380/AT4G10500/AT4G12735/AT4G14365/AT4G18980/AT4G23810/AT4G36040/AT5G24110/AT5G24530/AT5G25930/AT5G37600…
GO:0010150	leaf senescence	286	AT4G35590	RKD5	NOVEL	34/2814	198/30167	0.000365402	0.00729973	34	AT1G01680/AT1G02390/AT1G31040/AT1G32450/AT1G66830/AT1G66880/AT1G73220/AT1G73500/AT1G76680/AT2G13810/AT2G25460/AT2G34610/AT2G37750/AT2G42540/AT2G43000/AT2G44300/AT3G05400/AT3G11340/AT3G14060/AT3G25010/AT3G25882/AT3G50760/AT4G10500/AT4G12735/AT4G15610/AT4G18980/AT4G23810/AT4G32940/AT5G24110/AT5G25930/AT5G44610/AT5G52310/AT5G62165/AT5G63130
GO:0010150	leaf senescence	287	AT1G71450	FUF1	NOVEL	35/2813	198/30167	0.000169118	0.00315126	35	AT1G01680/AT1G02390/AT1G11190/AT1G21000/AT1G32450/AT1G73220/AT1G73500/AT1G76680/AT2G13810/AT2G25460/AT2G34610/AT2G35980/AT2G37750/AT2G39200/AT2G44300/AT3G05400/AT3G07350/AT3G10985/AT3G22910/AT3G25010/AT3G25882/AT4G01870/AT4G02380/AT4G10500/AT4G12735/AT4G15610/AT4G23810/AT4G32940/AT4G36040/AT5G24110/AT5G24530/AT5G52310/AT5G59220/AT5G62165/AT5G63130
GO:0010150	leaf senescence	288	AT3G46080	AT3G46080	NOVEL	46/2826	198/30167	5.64e-09	2.51e-07	46	AT1G01680/AT1G02390/AT1G11190/AT1G30700/AT1G32450/AT1G36622/AT1G73220/AT1G73500/AT1G76680/AT1G76980/AT2G13810/AT2G18690/AT2G22300/AT2G25460/AT2G25625/AT2G30550/AT2G31570/AT2G34610/AT2G35980/AT2G39200/AT2G44300/AT2G44480/AT2G46950/AT3G11340/AT3G14060/AT3G22910/AT3G25882/AT3G48020/AT3G56400/AT4G01870/AT4G02380/AT4G10500/AT4G12735/AT4G14365/AT4G15610/AT4G23810/AT4G32940/AT5G03280/AT5G24110/AT5G24530…
GO:0010150	leaf senescence	289	AT3G61850	DAG1	NOVEL	40/2837	198/30167	2.83e-06	7.19e-05	40	AT1G02390/AT1G17020/AT1G20900/AT1G30700/AT1G31040/AT1G32450/AT1G54570/AT1G69490/AT1G73220/AT1G76680/AT2G13790/AT2G13810/AT2G25460/AT2G34610/AT2G35980/AT2G37750/AT2G39200/AT2G44300/AT2G44480/AT2G46950/AT3G05400/AT3G11340/AT3G14060/AT3G25010/AT3G60670/AT4G01870/AT4G02380/AT4G12735/AT4G14365/AT4G15610/AT4G23810/AT4G32940/AT5G39610/AT5G44160/AT5G44610/AT5G52300/AT5G52310/AT5G59220/AT5G62165/AT5G63130
GO:0010150	leaf senescence	290	AT1G74500	ATBS1,bHLH135,BS1,PRE3,TMO7	NOVEL	40/2821	198/30167	2.46e-06	6.98e-05	40	AT1G02390/AT1G11190/AT1G30700/AT1G32450/AT1G54570/AT1G69490/AT1G73220/AT1G73500/AT1G76680/AT1G76980/AT2G13810/AT2G25460/AT2G25625/AT2G34610/AT2G35980/AT2G37750/AT2G43000/AT2G44300/AT2G46950/AT3G05400/AT3G11340/AT3G56400/AT3G60670/AT4G01870/AT4G02380/AT4G15610/AT4G23810/AT5G03280/AT5G24110/AT5G24530/AT5G25930/AT5G37600/AT5G39050/AT5G44160/AT5G44610/AT5G52310/AT5G56870/AT5G62000/AT5G62165/AT5G63130
GO:0010150	leaf senescence	291	AT1G77200	AT1G77200	NOVEL	32/2808	198/30167	0.00147072	0.0208469	32	AT1G02390/AT1G20900/AT1G30700/AT1G31040/AT1G32450/AT1G54570/AT1G69490/AT1G73220/AT1G76680/AT2G13810/AT2G25460/AT2G31570/AT2G34610/AT2G42540/AT2G43000/AT2G46950/AT3G05400/AT3G11340/AT3G14060/AT3G22910/AT3G60670/AT4G01870/AT4G02380/AT4G15610/AT5G03280/AT5G25930/AT5G39050/AT5G44610/AT5G52300/AT5G52310/AT5G59220/AT5G62165
GO:0010150	leaf senescence	292	AT5G10140	AGL25,FLC,FLF,RSB6	NOVEL	35/2802	198/30167	0.000156793	0.0034265	35	AT1G01680/AT1G02390/AT1G11190/AT1G30700/AT1G32450/AT1G53230/AT1G66830/AT1G73220/AT1G76680/AT2G13810/AT2G25460/AT2G34610/AT2G37750/AT2G43000/AT2G43570/AT2G44300/AT2G46950/AT3G14060/AT3G25882/AT3G26210/AT4G01870/AT4G10500/AT4G15610/AT4G18980/AT4G23810/AT5G23950/AT5G24110/AT5G24530/AT5G25930/AT5G37600/AT5G51720/AT5G52310/AT5G62165/AT5G63130/AT5G64940
GO:0010150	leaf senescence	293	AT1G63030	ATDDF2,ddf2	NOVEL	34/2807	198/30167	0.000349182	0.00508567	34	AT1G01680/AT1G02390/AT1G18210/AT1G21000/AT1G32450/AT1G66880/AT1G73220/AT1G73500/AT1G76680/AT1G76980/AT2G13810/AT2G25460/AT2G30550/AT2G35980/AT2G39200/AT2G44300/AT2G46950/AT3G07350/AT3G10985/AT3G22910/AT3G25882/AT3G28100/AT3G50760/AT4G01250/AT4G01870/AT4G02380/AT4G32940/AT4G36040/AT5G24110/AT5G44160/AT5G52310/AT5G62165/AT5G63130/AT5G64230
GO:0010150	leaf senescence	294	AT5G49200	AT5G49200	NOVEL	31/2774	198/30167	0.00237556	0.0375848	31	AT1G01680/AT1G02390/AT1G11190/AT1G18210/AT1G66830/AT1G73220/AT1G76680/AT2G13810/AT2G25460/AT2G34610/AT2G39200/AT2G43000/AT2G44300/AT2G46950/AT3G10985/AT3G25010/AT3G25882/AT3G50760/AT4G01250/AT4G01870/AT4G02380/AT4G10500/AT4G32940/AT4G36040/AT5G24110/AT5G24530/AT5G37600/AT5G52300/AT5G52310/AT5G62165/AT5G63130
GO:0010150	leaf senescence	295	AT1G01720	ANAC002,ANAC2,ATAF1	NOVEL	44/2817	198/30167	4.44e-08	1.4e-06	44	AT1G02390/AT1G08050/AT1G11190/AT1G30700/AT1G31040/AT1G32450/AT1G54570/AT1G64140/AT1G69490/AT1G73500/AT1G76680/AT2G18690/AT2G25460/AT2G31570/AT2G34610/AT2G35980/AT2G37750/AT2G39200/AT2G39730/AT2G44300/AT2G46950/AT3G11340/AT3G14060/AT3G22910/AT3G25882/AT3G56400/AT3G60670/AT4G01250/AT4G01870/AT4G02380/AT4G10500/AT4G15610/AT4G23810/AT4G32940/AT5G24530/AT5G25930/AT5G37600/AT5G39050/AT5G44160/AT5G44610…
GO:0010150	leaf senescence	296	AT5G58010	DROP3,LRL3	NOVEL	32/2782	198/30167	0.00126487	0.0151271	32	AT1G02390/AT1G05620/AT1G11190/AT1G32450/AT1G73220/AT1G73500/AT1G76680/AT2G25460/AT2G31570/AT2G34610/AT2G37750/AT2G44300/AT3G05400/AT3G07350/AT3G10985/AT3G11340/AT3G29035/AT3G54680/AT3G56400/AT3G60670/AT4G01870/AT4G02380/AT4G15610/AT4G36040/AT5G24530/AT5G37600/AT5G39050/AT5G44610/AT5G52310/AT5G56870/AT5G62165/AT5G63130
GO:0010150	leaf senescence	297	AT1G44830	AtERF014,ERF014	NOVEL	37/2781	198/30167	2.6e-05	0.000533791	37	AT1G02390/AT1G11190/AT1G30700/AT1G32450/AT1G54570/AT1G73220/AT1G73500/AT1G76680/AT2G25460/AT2G31570/AT2G34610/AT2G35980/AT2G37750/AT2G39200/AT2G44300/AT2G46950/AT3G05400/AT3G11340/AT3G14060/AT3G22910/AT3G25882/AT3G56400/AT3G60670/AT4G01870/AT4G02380/AT4G10500/AT4G14365/AT4G15610/AT4G23810/AT4G32940/AT5G24110/AT5G24530/AT5G44160/AT5G52310/AT5G56870/AT5G59220/AT5G62165
GO:0010150	leaf senescence	298	AT5G52170	HDG7	NOVEL	33/2772	198/30167	0.000584959	0.00891807	33	AT1G02390/AT1G20900/AT1G30700/AT1G31040/AT1G32450/AT1G73220/AT1G76680/AT2G13810/AT2G25460/AT2G31570/AT2G34610/AT2G44300/AT2G46950/AT3G05400/AT3G11340/AT3G14060/AT3G22910/AT3G25010/AT3G56860/AT3G60670/AT4G01870/AT4G02380/AT4G12735/AT4G15610/AT5G23950/AT5G24530/AT5G25930/AT5G44160/AT5G44610/AT5G52300/AT5G52310/AT5G62000/AT5G62165
GO:0010150	leaf senescence	299	AT1G70920	ATHB18,HB18	NOVEL	31/2763	198/30167	0.00223527	0.0241301	31	AT1G02390/AT1G11190/AT1G30700/AT1G32450/AT1G54570/AT1G73220/AT1G73500/AT1G76680/AT2G34610/AT2G44300/AT2G46950/AT3G05400/AT3G07350/AT3G11340/AT3G14060/AT3G22910/AT3G25882/AT3G60670/AT4G01870/AT4G02380/AT4G10500/AT4G12735/AT4G15610/AT4G23810/AT4G36040/AT5G35110/AT5G44610/AT5G52310/AT5G56870/AT5G59220/AT5G62165
GO:0010150	leaf senescence	300	AT5G22380	anac090,NAC090	NOVEL	48/2781	198/30167	3.42e-10	1.53e-08	48	AT1G01680/AT1G02390/AT1G13990/AT1G21000/AT1G34420/AT1G54040/AT1G54130/AT1G66830/AT1G66880/AT1G69490/AT1G73500/AT1G76680/AT1G76980/AT2G02710/AT2G13810/AT2G18690/AT2G25460/AT2G30550/AT2G34610/AT2G35980/AT3G14067/AT3G22910/AT3G25010/AT3G25882/AT3G28100/AT3G29035/AT3G50760/AT3G52430/AT3G56400/AT4G01250/AT4G01870/AT4G02380/AT4G14365/AT4G18980/AT4G23810/AT4G32940/AT4G36040/AT5G24110/AT5G24530/AT5G25930…
GO:0010150	leaf senescence	301	AT5G11260	HY5,TED5	NOVEL	39/2770	198/30167	4.01e-06	0.000118202	39	AT1G02390/AT1G20900/AT1G30700/AT1G31040/AT1G32450/AT1G54570/AT1G69490/AT1G73220/AT1G73500/AT1G76680/AT2G18690/AT2G22300/AT2G25460/AT2G31570/AT2G34610/AT2G39730/AT2G44300/AT2G46950/AT3G05400/AT3G11340/AT3G14060/AT3G25882/AT3G52430/AT3G60670/AT4G01870/AT4G02380/AT4G10500/AT4G15610/AT4G23810/AT4G32940/AT5G24530/AT5G25930/AT5G37600/AT5G44610/AT5G51720/AT5G52310/AT5G59220/AT5G63130/AT5G64940
GO:0010150	leaf senescence	302	AT3G17609	HYH	NOVEL	48/2756	198/30167	2.52e-10	1.39e-08	48	AT1G01680/AT1G02390/AT1G20900/AT1G21000/AT1G30700/AT1G31040/AT1G32450/AT1G54130/AT1G54570/AT1G68620/AT1G69490/AT1G73220/AT1G73500/AT1G76680/AT1G76980/AT2G13810/AT2G18690/AT2G22300/AT2G25460/AT2G25625/AT2G31570/AT2G34610/AT2G35980/AT2G39730/AT2G44300/AT2G46950/AT3G05400/AT3G11340/AT3G14060/AT3G14067/AT3G25882/AT3G56400/AT3G60670/AT4G01870/AT4G02380/AT4G12735/AT4G15610/AT4G23810/AT4G32940/AT5G24110…
GO:0010150	leaf senescence	303	AT5G49420	AGL84	NOVEL	37/2740	198/30167	1.88e-05	0.000600245	37	AT1G01680/AT1G02390/AT1G11190/AT1G21000/AT1G54130/AT1G66830/AT1G66880/AT1G73220/AT1G73500/AT1G76680/AT1G76980/AT2G13810/AT2G22300/AT2G25460/AT2G30550/AT2G34610/AT2G44480/AT2G46950/AT3G05400/AT3G25010/AT3G25882/AT3G28100/AT3G52430/AT4G01870/AT4G02380/AT4G10500/AT4G12735/AT4G32940/AT5G24110/AT5G24530/AT5G25930/AT5G39050/AT5G44610/AT5G52310/AT5G56870/AT5G62165/AT5G63130
GO:0010150	leaf senescence	304	AT2G38250	AT2G38250	NOVEL	40/2736	198/30167	1.15e-06	4.38e-05	40	AT1G01680/AT1G02390/AT1G08050/AT1G11190/AT1G30700/AT1G32450/AT1G36622/AT1G73220/AT1G76680/AT2G13810/AT2G18690/AT2G25460/AT2G34610/AT2G35980/AT2G39200/AT2G44480/AT2G46950/AT3G05400/AT3G11340/AT3G22910/AT3G25010/AT3G25882/AT3G60670/AT4G01870/AT4G02380/AT4G10500/AT4G12735/AT4G14370/AT4G15610/AT4G18980/AT4G36040/AT5G23950/AT5G24110/AT5G24530/AT5G25930/AT5G37600/AT5G44610/AT5G52310/AT5G59220/AT5G62165
GO:0010150	leaf senescence	305	AT3G13840	AT3G13840	NOVEL	31/2739	198/30167	0.00195381	0.026319	31	AT1G01680/AT1G11190/AT1G21000/AT1G54130/AT1G73220/AT1G73500/AT1G76680/AT2G13810/AT2G22300/AT2G25460/AT2G30550/AT2G34610/AT2G35980/AT2G39730/AT2G44300/AT2G44480/AT2G46950/AT3G25010/AT3G25882/AT4G01250/AT4G01870/AT4G02380/AT4G10500/AT4G12735/AT4G32940/AT5G24530/AT5G25930/AT5G52310/AT5G62165/AT5G63130/AT5G64230
GO:0010150	leaf senescence	306	AT2G25820	ESE2	NOVEL	38/2738	198/30167	7.62e-06	0.000225761	38	AT1G01680/AT1G02390/AT1G31040/AT1G32450/AT1G34420/AT1G66880/AT1G73220/AT1G73500/AT1G76680/AT2G18690/AT2G22300/AT2G25460/AT2G30550/AT2G31570/AT2G35980/AT2G39730/AT2G44300/AT2G46950/AT3G05400/AT3G10985/AT3G25010/AT3G25882/AT3G50760/AT3G56400/AT4G15610/AT4G23810/AT4G32940/AT5G24110/AT5G24530/AT5G25930/AT5G35110/AT5G37600/AT5G51720/AT5G52310/AT5G59220/AT5G62165/AT5G63130/AT5G64940
GO:0010150	leaf senescence	307	AT2G13960	AT2G13960	NOVEL	40/2733	198/30167	1.12e-06	4.28e-05	40	AT1G01680/AT1G02390/AT1G09176/AT1G11190/AT1G21000/AT1G30700/AT1G32450/AT1G66830/AT1G66880/AT1G73220/AT1G73500/AT1G76680/AT1G76980/AT2G13810/AT2G22300/AT2G25460/AT2G25625/AT2G30550/AT2G31570/AT2G34610/AT2G39200/AT2G42540/AT2G43000/AT2G44300/AT2G46950/AT3G05400/AT3G25010/AT3G25882/AT3G56400/AT4G01870/AT4G02380/AT4G18980/AT4G23810/AT4G32940/AT4G36040/AT5G24530/AT5G25930/AT5G52310/AT5G62165/AT5G63130
GO:0010150	leaf senescence	308	AT2G46270	GBF3	NOVEL	50/2733	198/30167	1.64e-11	7.97e-10	50	AT1G02390/AT1G08050/AT1G20180/AT1G20900/AT1G21000/AT1G30700/AT1G31040/AT1G32450/AT1G54570/AT1G73500/AT1G76680/AT1G76980/AT2G13810/AT2G18690/AT2G22300/AT2G25460/AT2G31570/AT2G34610/AT2G35980/AT2G37750/AT2G39200/AT2G44300/AT2G44480/AT2G46950/AT3G11340/AT3G14060/AT3G22910/AT3G25010/AT3G25882/AT3G29035/AT3G60670/AT4G01870/AT4G02380/AT4G10500/AT4G12735/AT4G15610/AT4G23810/AT4G32940/AT4G36040/AT5G24530…
GO:0010150	leaf senescence	309	AT5G65640	bHLH093,NFL	NOVEL	31/2719	198/30167	0.00174327	0.0173359	31	AT1G02390/AT1G20900/AT1G30700/AT1G31040/AT1G32450/AT1G54570/AT1G73220/AT1G76680/AT2G25460/AT2G31570/AT2G34610/AT2G35980/AT2G44300/AT2G46950/AT3G05400/AT3G11340/AT3G14060/AT3G60670/AT4G01870/AT4G02380/AT4G10500/AT4G15610/AT4G23810/AT4G30490/AT4G32940/AT5G24530/AT5G25930/AT5G44610/AT5G52300/AT5G52310/AT5G59220
GO:0010150	leaf senescence	310	AT2G29060	AT2G29060	NOVEL	33/2708	198/30167	0.000387811	0.00612812	33	AT1G02390/AT1G20900/AT1G30700/AT1G32450/AT1G54570/AT1G73220/AT1G73500/AT1G76680/AT1G76980/AT2G13810/AT2G25460/AT2G34610/AT2G37750/AT2G44300/AT2G46950/AT3G05400/AT3G11340/AT3G14060/AT3G22910/AT4G01870/AT4G02380/AT4G12735/AT4G15610/AT4G23810/AT4G32940/AT5G23950/AT5G24530/AT5G44160/AT5G44610/AT5G52300/AT5G52310/AT5G62165/AT5G63130
GO:0010150	leaf senescence	311	AT3G28470	ATMYB35,MYB35,TDF1	NOVEL	36/2706	198/30167	3.42e-05	0.00104481	36	AT1G01680/AT1G66830/AT1G66880/AT1G73220/AT1G73500/AT1G76680/AT1G76980/AT2G13810/AT2G25460/AT2G30550/AT2G34610/AT2G44300/AT2G44480/AT2G46950/AT3G07350/AT3G10985/AT3G11340/AT3G25010/AT3G25882/AT3G60670/AT4G01250/AT4G02380/AT4G10500/AT4G15610/AT4G32940/AT4G36040/AT5G03280/AT5G24110/AT5G24530/AT5G25930/AT5G37600/AT5G44610/AT5G52310/AT5G56870/AT5G62165/AT5G63130
GO:0010150	leaf senescence	312	AT2G41070	ATBZIP12,DPBF4,EEL	NOVEL	39/2709	198/30167	2.35e-06	6.87e-05	39	AT1G02390/AT1G09176/AT1G20900/AT1G30700/AT1G31040/AT1G32450/AT1G73220/AT1G76680/AT1G76980/AT2G18690/AT2G22300/AT2G25460/AT2G31570/AT2G34610/AT2G37750/AT2G39200/AT2G44300/AT2G46950/AT3G05400/AT3G11340/AT3G14060/AT3G22910/AT3G25010/AT3G25882/AT3G60670/AT4G01870/AT4G02380/AT4G10500/AT4G12735/AT4G14370/AT4G15610/AT4G23810/AT4G32940/AT5G24530/AT5G25930/AT5G39610/AT5G44610/AT5G52310/AT5G63130
GO:0010150	leaf senescence	313	AT5G59820	AtZAT12,RHL41,ZAT12	NOVEL	53/2746	198/30167	4.12e-13	2.06e-11	53	AT1G02390/AT1G11190/AT1G13990/AT1G30700/AT1G32450/AT1G54570/AT1G69490/AT1G73500/AT1G76680/AT2G18690/AT2G22300/AT2G25460/AT2G25625/AT2G31570/AT2G34610/AT2G35980/AT2G37750/AT2G39200/AT2G39730/AT2G44300/AT2G46950/AT3G05400/AT3G10500/AT3G11340/AT3G19190/AT3G22910/AT3G25882/AT3G26210/AT3G29035/AT3G56400/AT3G60670/AT4G01250/AT4G01870/AT4G02380/AT4G03550/AT4G10500/AT4G12735/AT4G14365/AT4G14370/AT4G15610…
GO:0010150	leaf senescence	314	AT5G17810	WOX12	NOVEL	31/2696	198/30167	0.00152578	0.018803	31	AT1G01680/AT1G02390/AT1G11190/AT1G17020/AT1G30700/AT1G32450/AT1G73220/AT1G73500/AT1G76680/AT2G13810/AT2G25460/AT2G30550/AT2G34610/AT2G39200/AT2G43000/AT2G44300/AT2G46950/AT3G05400/AT3G60670/AT4G01870/AT4G02380/AT4G12735/AT4G15610/AT4G23810/AT4G32940/AT5G24110/AT5G39050/AT5G52300/AT5G52310/AT5G62165/AT5G63130
GO:0010150	leaf senescence	315	AT5G25470	AT5G25470	NOVEL	33/2672	198/30167	0.000305208	0.00846951	33	AT1G02390/AT1G11190/AT1G20180/AT1G32450/AT1G54570/AT1G66830/AT1G73220/AT1G73500/AT1G76680/AT2G13810/AT2G18690/AT2G25625/AT2G30550/AT2G34610/AT2G44480/AT2G46950/AT3G05400/AT3G25010/AT3G25882/AT3G29035/AT3G60670/AT4G01870/AT4G02380/AT4G10500/AT4G18980/AT4G23810/AT4G32940/AT5G24110/AT5G24530/AT5G25930/AT5G52310/AT5G56870/AT5G62165
GO:0010150	leaf senescence	316	AT1G29950	SACL3	NOVEL	35/2691	198/30167	7.08e-05	0.00127507	35	AT1G02390/AT1G08050/AT1G11190/AT1G30700/AT1G32450/AT1G54570/AT1G69490/AT1G73220/AT1G73500/AT1G76680/AT1G76980/AT2G25460/AT2G31570/AT2G34610/AT2G37750/AT2G44300/AT2G46950/AT3G05400/AT3G07350/AT3G11340/AT3G22910/AT3G56400/AT3G60670/AT4G01870/AT4G02380/AT4G15610/AT4G18980/AT4G23810/AT4G32940/AT4G36040/AT5G25930/AT5G44610/AT5G52310/AT5G59220/AT5G62165
GO:0010150	leaf senescence	317	AT1G74650	ATMYB31,ATY13,MYB31	NOVEL	52/2710	198/30167	9.22e-13	5.64e-11	52	AT1G02390/AT1G11190/AT1G13990/AT1G21000/AT1G30700/AT1G32450/AT1G34420/AT1G36622/AT1G73220/AT1G73500/AT1G76680/AT1G76980/AT2G13800/AT2G13810/AT2G18690/AT2G22300/AT2G25460/AT2G30550/AT2G31570/AT2G34610/AT2G37750/AT2G39200/AT2G44300/AT2G44480/AT2G46950/AT3G07350/AT3G10500/AT3G10985/AT3G11340/AT3G14060/AT3G25882/AT3G26210/AT3G29035/AT3G50760/AT4G01250/AT4G02380/AT4G10500/AT4G12735/AT4G15610/AT4G23810…
GO:0010150	leaf senescence	318	AT1G26790	CDF6	NOVEL	33/2680	198/30167	0.000322064	0.00683404	33	AT1G01680/AT1G02390/AT1G09176/AT1G21000/AT1G32450/AT1G66880/AT1G73220/AT1G73500/AT1G76680/AT2G13810/AT2G34610/AT2G35980/AT2G39730/AT3G05400/AT3G07350/AT3G10985/AT3G25010/AT3G25882/AT3G28100/AT4G02380/AT4G10500/AT4G22750/AT4G32940/AT4G36040/AT5G24110/AT5G24530/AT5G25930/AT5G44160/AT5G52310/AT5G56870/AT5G62165/AT5G63130/AT5G64230
GO:0010150	leaf senescence	319	AT5G25810	tny	NOVEL	32/2678	198/30167	0.00067194	0.00982152	32	AT1G02390/AT1G11190/AT1G30700/AT1G32450/AT1G54570/AT1G73220/AT1G76680/AT2G18690/AT2G25460/AT2G25625/AT2G31570/AT2G34610/AT2G35980/AT2G44300/AT2G46950/AT3G05400/AT3G11340/AT3G14060/AT3G60670/AT4G01870/AT4G02380/AT4G15610/AT4G23810/AT4G36040/AT5G24530/AT5G39050/AT5G44610/AT5G52300/AT5G52310/AT5G56870/AT5G62165/AT5G63130
GO:0010150	leaf senescence	320	AT3G11580	NGAL2,SOD7	NOVEL	55/2659	198/30167	7.22e-15	5.17e-13	55	AT1G01680/AT1G02390/AT1G11190/AT1G20900/AT1G21000/AT1G30700/AT1G32450/AT1G54570/AT1G73220/AT1G73500/AT1G76680/AT1G76980/AT2G13810/AT2G18690/AT2G22300/AT2G25460/AT2G31570/AT2G34610/AT2G35980/AT2G37750/AT2G39200/AT2G39730/AT2G43000/AT2G44300/AT2G44480/AT2G46950/AT3G05400/AT3G11340/AT3G14060/AT3G22910/AT3G25010/AT3G25882/AT3G29035/AT3G60670/AT4G01870/AT4G02380/AT4G10500/AT4G15610/AT4G18980/AT4G23810…
GO:0010150	leaf senescence	321	AT5G01380	AT5G01380	NOVEL	46/2669	198/30167	9.26e-10	5.39e-08	46	AT1G01680/AT1G02390/AT1G11190/AT1G18210/AT1G21000/AT1G30700/AT1G32450/AT1G54570/AT1G73220/AT1G73500/AT1G76680/AT1G76980/AT2G13810/AT2G18690/AT2G25460/AT2G34610/AT2G35980/AT2G39200/AT2G43000/AT2G43570/AT2G44300/AT2G44480/AT2G46950/AT3G05400/AT3G10985/AT3G22910/AT3G25882/AT4G01870/AT4G02380/AT4G10500/AT4G12735/AT4G14365/AT4G15610/AT4G18980/AT4G23810/AT4G32940/AT4G36040/AT5G24110/AT5G24530/AT5G25930…
GO:0010150	leaf senescence	322	AT1G68200	AtC3H15,CDM1	NOVEL	35/2649	198/30167	5.15e-05	0.00161246	35	AT1G11190/AT1G18210/AT1G30700/AT1G32450/AT1G66830/AT1G73220/AT1G73500/AT1G76680/AT2G13810/AT2G34610/AT2G35980/AT2G39730/AT2G44300/AT3G05400/AT3G14060/AT3G22910/AT3G25882/AT3G60670/AT4G01870/AT4G02380/AT4G10500/AT4G12735/AT4G15610/AT4G23810/AT4G32940/AT5G24110/AT5G25930/AT5G35110/AT5G44160/AT5G44610/AT5G52300/AT5G52310/AT5G56870/AT5G62165/AT5G63130
GO:0010150	leaf senescence	323	AT1G77080	AGL27,FLM,MAF1	NOVEL	50/2676	198/30167	7.64e-12	4.27e-10	50	AT1G02390/AT1G11190/AT1G21000/AT1G30700/AT1G32450/AT1G69490/AT1G73220/AT1G76680/AT1G76980/AT2G18690/AT2G25460/AT2G30550/AT2G31570/AT2G35980/AT2G37750/AT2G39200/AT2G39730/AT2G43000/AT2G44300/AT2G44480/AT2G46950/AT3G05400/AT3G14060/AT3G25010/AT3G25882/AT3G26210/AT3G52430/AT3G56400/AT3G60670/AT4G01870/AT4G02380/AT4G10500/AT4G15610/AT4G18980/AT4G23810/AT4G32940/AT4G36040/AT5G24110/AT5G24530/AT5G25930…
GO:0010150	leaf senescence	324	AT1G02250	anac005,NAC005	NOVEL	29/2641	198/30167	0.00424304	0.0454316	29	AT1G01680/AT1G11190/AT1G21000/AT1G73220/AT1G73500/AT2G13810/AT2G25460/AT2G30550/AT2G31570/AT2G34610/AT2G35980/AT2G44300/AT2G46950/AT3G22910/AT3G25882/AT3G43230/AT4G01870/AT4G02380/AT4G10500/AT4G32940/AT5G24110/AT5G24530/AT5G25930/AT5G39610/AT5G44610/AT5G52310/AT5G56870/AT5G62165/AT5G63130
GO:0010150	leaf senescence	325	AT3G49760	AtbZIP5,bZIP5	NOVEL	32/2635	198/30167	0.000509935	0.00757745	32	AT1G02390/AT1G11190/AT1G30700/AT1G32450/AT1G73220/AT1G73500/AT1G76680/AT1G76980/AT2G13810/AT2G25460/AT2G31570/AT2G34610/AT2G37750/AT2G44300/AT2G46950/AT3G05400/AT3G07350/AT3G11340/AT4G01870/AT4G02380/AT4G15610/AT4G23810/AT4G32940/AT4G36040/AT5G03280/AT5G39050/AT5G44160/AT5G44610/AT5G52310/AT5G56870/AT5G62165/AT5G63130
GO:0010150	leaf senescence	326	AT1G33280	ANAC015,BRN1,NAC015	NOVEL	36/2652	198/30167	2.23e-05	0.000508586	36	AT1G02390/AT1G11190/AT1G20180/AT1G30700/AT1G32450/AT1G73220/AT1G73500/AT1G76680/AT1G76980/AT2G18690/AT2G25460/AT2G25625/AT2G30550/AT2G34610/AT2G37750/AT2G39200/AT2G44300/AT2G46950/AT3G05400/AT3G11340/AT3G22910/AT3G26210/AT3G48020/AT4G01870/AT4G02380/AT4G15610/AT4G23810/AT4G36040/AT5G24110/AT5G24530/AT5G37600/AT5G39050/AT5G44610/AT5G52310/AT5G62165/AT5G63130
GO:0010150	leaf senescence	327	AT4G21440	ATM4,ATMYB102,MYB102,MYB102	NOVEL	45/2660	198/30167	2.65e-09	1.24e-07	45	AT1G01680/AT1G02390/AT1G18210/AT1G21000/AT1G30700/AT1G32450/AT1G54040/AT1G54130/AT1G69490/AT1G73220/AT1G73500/AT1G76680/AT1G76980/AT2G22300/AT2G25460/AT2G30550/AT2G34610/AT2G37750/AT2G44300/AT2G44480/AT3G05400/AT3G07350/AT3G10985/AT3G25010/AT3G25882/AT3G29035/AT3G54680/AT3G56400/AT3G60670/AT4G01870/AT4G02380/AT4G10500/AT4G12735/AT4G15610/AT4G18980/AT4G23810/AT4G32940/AT4G36040/AT5G24110/AT5G24530…
GO:0010150	leaf senescence	328	AT4G23550	ATWRKY29,WRKY29	NOVEL	32/2618	198/30167	0.00045614	0.00832456	32	AT1G11190/AT1G17020/AT1G20900/AT1G30700/AT1G31040/AT1G32450/AT1G54570/AT1G73220/AT1G76680/AT2G34610/AT2G35980/AT2G44300/AT2G46950/AT3G05400/AT3G11340/AT3G25882/AT3G60670/AT4G01870/AT4G02380/AT4G12735/AT4G15610/AT4G32940/AT5G23950/AT5G25930/AT5G35110/AT5G37600/AT5G44160/AT5G44610/AT5G52300/AT5G52310/AT5G62000/AT5G62165
GO:0010150	leaf senescence	329	AT4G37850	AT4G37850	NOVEL	30/2616	198/30167	0.00190413	0.0244406	30	AT1G01680/AT1G02390/AT1G11190/AT1G32450/AT1G36622/AT1G73220/AT1G73500/AT1G76680/AT1G76980/AT2G13810/AT2G25460/AT2G34610/AT2G39200/AT2G44300/AT2G46950/AT3G05400/AT3G07350/AT3G25010/AT4G01870/AT4G02380/AT4G10500/AT4G15610/AT4G32940/AT4G36040/AT5G24110/AT5G25930/AT5G39050/AT5G52310/AT5G62165/AT5G63130
GO:0010150	leaf senescence	330	AT1G17310	AGL100	NOVEL	36/2620	198/30167	1.72e-05	0.000372454	36	AT1G11190/AT1G13990/AT1G30700/AT1G32450/AT1G54130/AT1G54570/AT1G73220/AT1G73500/AT1G76680/AT1G76980/AT2G13810/AT2G25460/AT2G30550/AT2G31570/AT2G34610/AT2G39200/AT2G46950/AT3G05400/AT3G07350/AT3G25882/AT4G01870/AT4G02380/AT4G15610/AT4G18980/AT4G23810/AT4G32940/AT4G36040/AT5G24530/AT5G25930/AT5G37600/AT5G44610/AT5G52300/AT5G52310/AT5G62000/AT5G62165/AT5G63130
GO:0010150	leaf senescence	331	AT1G74660	MIF1	NOVEL	38/2622	198/30167	2.78e-06	6.45e-05	38	AT1G02390/AT1G20900/AT1G30700/AT1G31040/AT1G32450/AT1G54570/AT1G73220/AT1G73500/AT1G76680/AT1G76980/AT2G25460/AT2G31570/AT2G34610/AT2G37750/AT2G39200/AT2G44300/AT2G46950/AT3G05400/AT3G11340/AT3G14060/AT3G60670/AT4G01870/AT4G02380/AT4G12735/AT4G15610/AT4G23810/AT4G32940/AT5G24530/AT5G25930/AT5G35110/AT5G44160/AT5G44610/AT5G52300/AT5G52310/AT5G56870/AT5G59220/AT5G62000/AT5G63130
GO:0010150	leaf senescence	332	AT1G01380	ETC1	NOVEL	34/2615	198/30167	9.19e-05	0.00172707	34	AT1G20900/AT1G30700/AT1G31040/AT1G32450/AT1G73220/AT1G73500/AT1G76680/AT1G76980/AT2G34610/AT2G35980/AT2G37750/AT2G44300/AT2G44480/AT2G46950/AT3G05400/AT3G11340/AT3G14060/AT3G25010/AT3G25882/AT3G60670/AT4G01870/AT4G02380/AT4G15610/AT4G32940/AT5G23950/AT5G25930/AT5G35110/AT5G44160/AT5G44610/AT5G52300/AT5G52310/AT5G56870/AT5G59220/AT5G62165
GO:0010150	leaf senescence	333	AT5G49620	AtMYB78,MYB78	NOVEL	32/2587	198/30167	0.000370891	0.00709637	32	AT1G01680/AT1G11190/AT1G21000/AT1G32450/AT1G54570/AT1G68620/AT1G73220/AT1G73500/AT1G76680/AT1G76980/AT2G13810/AT2G25460/AT2G25625/AT2G34610/AT2G44300/AT2G46950/AT3G05400/AT3G25882/AT3G60670/AT4G01870/AT4G02380/AT4G12735/AT4G15610/AT4G23810/AT4G32940/AT4G36040/AT5G24530/AT5G25930/AT5G39050/AT5G52310/AT5G56870/AT5G62165
GO:0010150	leaf senescence	334	AT1G51190	PLT2	NOVEL	32/2586	198/30167	0.000368395	0.00653133	32	AT1G01680/AT1G02390/AT1G20180/AT1G32450/AT1G73220/AT1G73500/AT1G76680/AT2G13810/AT2G25460/AT2G25625/AT2G34610/AT2G37750/AT2G43000/AT2G44300/AT2G46950/AT3G22910/AT3G25010/AT3G56400/AT3G60670/AT4G01870/AT4G02380/AT4G10500/AT4G12735/AT4G15610/AT4G23810/AT4G32940/AT5G24530/AT5G25930/AT5G52300/AT5G52310/AT5G62165/AT5G63130
GO:0010150	leaf senescence	335	AT3G03200	anac045,NAC045,NAC45	NOVEL	31/2579	198/30167	0.000746599	0.0101882	31	AT1G02390/AT1G11190/AT1G18210/AT1G21000/AT1G30700/AT1G31040/AT1G32450/AT1G73220/AT1G73500/AT1G76680/AT1G76980/AT2G18690/AT2G34610/AT2G35980/AT2G37750/AT2G44300/AT2G46950/AT3G05400/AT3G10985/AT3G22910/AT3G25010/AT3G25882/AT3G60670/AT4G01870/AT4G02380/AT4G36040/AT5G44160/AT5G44610/AT5G52310/AT5G59220/AT5G63130
GO:0010150	leaf senescence	336	AT1G80840	ATWRKY40,WRKY40	NOVEL	50/2596	198/30167	2.51e-12	1.26e-10	50	AT1G01680/AT1G02390/AT1G11190/AT1G21000/AT1G30700/AT1G32450/AT1G34420/AT1G36622/AT1G66830/AT1G66880/AT1G69490/AT1G73500/AT1G76680/AT2G13810/AT2G18690/AT2G22300/AT2G25460/AT2G25625/AT2G34610/AT2G35980/AT2G43000/AT2G44300/AT2G46950/AT3G11340/AT3G22910/AT3G25010/AT3G25882/AT3G26210/AT3G52430/AT3G56400/AT4G01250/AT4G01870/AT4G02380/AT4G10500/AT4G12735/AT4G14365/AT4G15610/AT4G18980/AT4G23810/AT4G32940…
GO:0010150	leaf senescence	337	AT3G10113	AT3G10113	NOVEL	40/2581	198/30167	2.58e-07	1.18e-05	40	AT1G01680/AT1G02390/AT1G11190/AT1G20180/AT1G21000/AT1G30700/AT1G32450/AT1G34420/AT1G36622/AT1G66880/AT1G73220/AT1G73500/AT1G76680/AT1G76980/AT2G13810/AT2G25460/AT2G30550/AT2G34610/AT2G39200/AT2G43000/AT2G44300/AT2G44480/AT2G46950/AT3G07350/AT3G25882/AT3G28100/AT3G60670/AT4G01870/AT4G10500/AT4G15610/AT4G32940/AT4G36040/AT5G24110/AT5G24530/AT5G25930/AT5G37600/AT5G52300/AT5G52310/AT5G62165/AT5G63130
GO:0010150	leaf senescence	338	AT1G26590	AT1G26590	NOVEL	30/2567	198/30167	0.00142476	0.0214752	30	AT1G01680/AT1G11190/AT1G30700/AT1G32450/AT1G54570/AT1G73220/AT1G73500/AT1G76680/AT1G76980/AT2G13810/AT2G18690/AT2G30550/AT2G34610/AT2G37750/AT2G44300/AT2G44480/AT2G46950/AT3G05400/AT3G22910/AT3G25882/AT3G56400/AT4G01870/AT4G02380/AT4G12735/AT4G32940/AT5G25930/AT5G52300/AT5G52310/AT5G56870/AT5G62165
GO:0010150	leaf senescence	339	AT1G44810	GPL4	NOVEL	44/2596	198/30167	3.93e-09	1.64e-07	44	AT1G01680/AT1G02390/AT1G20900/AT1G30700/AT1G31040/AT1G32450/AT1G36622/AT1G54130/AT1G54570/AT1G69490/AT1G76680/AT1G76980/AT2G18690/AT2G22300/AT2G25460/AT2G35980/AT2G37750/AT2G39200/AT2G39730/AT2G43000/AT2G44300/AT2G46950/AT3G05400/AT3G25010/AT3G25882/AT3G60670/AT4G01870/AT4G02380/AT4G10500/AT4G15610/AT4G23810/AT4G32940/AT5G24110/AT5G24530/AT5G25930/AT5G37600/AT5G39050/AT5G44160/AT5G52310/AT5G59220…
GO:0010150	leaf senescence	340	AT4G17785	MYB39	NOVEL	29/2568	198/30167	0.00284797	0.0361568	29	AT1G02390/AT1G11190/AT1G30700/AT1G32450/AT1G73220/AT1G73500/AT1G76680/AT2G13810/AT2G25460/AT2G34610/AT2G37750/AT2G44300/AT2G46950/AT3G07350/AT3G10985/AT3G11340/AT3G25882/AT4G02380/AT4G15610/AT4G30490/AT4G36040/AT5G24110/AT5G37600/AT5G39050/AT5G44160/AT5G44610/AT5G52310/AT5G62165/AT5G63130
GO:0010150	leaf senescence	341	AT5G07310	ERF115	NOVEL	32/2562	198/30167	0.000312813	0.0054037	32	AT1G01680/AT1G21000/AT1G73220/AT1G73500/AT1G76680/AT1G76980/AT2G13810/AT2G25460/AT2G34610/AT2G35980/AT2G37750/AT2G39200/AT2G43000/AT2G44300/AT2G44480/AT2G46950/AT3G10985/AT3G25882/AT3G28100/AT4G01870/AT4G02380/AT4G10500/AT4G12735/AT4G15610/AT4G32940/AT4G36040/AT5G24530/AT5G25930/AT5G52310/AT5G59220/AT5G62165/AT5G63130
GO:0010150	leaf senescence	342	AT5G38740	AGL77	NOVEL	29/2558	198/30167	0.00269165	0.0412719	29	AT1G01680/AT1G11190/AT1G21000/AT1G66830/AT1G66880/AT1G73220/AT1G73500/AT1G76680/AT1G76980/AT2G13810/AT2G25460/AT2G30550/AT2G34610/AT2G43000/AT2G46950/AT3G05400/AT3G22910/AT3G25010/AT3G25882/AT3G28100/AT3G60670/AT4G02380/AT4G32940/AT5G24530/AT5G25930/AT5G37600/AT5G52310/AT5G62165/AT5G63130
GO:0010150	leaf senescence	343	AT3G15500	ANAC055,ANAC55,ATNAC3,NAC055,NAC3	NOVEL	48/2572	198/30167	2.35e-11	1.58e-09	48	AT1G01680/AT1G02390/AT1G11190/AT1G21000/AT1G30700/AT1G32450/AT1G54570/AT1G66830/AT1G69490/AT1G73220/AT1G73500/AT1G76680/AT2G13810/AT2G18690/AT2G22300/AT2G25460/AT2G25625/AT2G30550/AT2G31570/AT2G35980/AT2G37750/AT2G39200/AT2G43000/AT2G44300/AT2G44480/AT3G14060/AT3G25882/AT3G26210/AT3G29035/AT3G48020/AT3G56400/AT4G01870/AT4G02380/AT4G10500/AT4G12735/AT4G15610/AT4G18980/AT4G23810/AT4G32940/AT4G36040…
GO:0010150	leaf senescence	344	AT2G46410	CPC	NOVEL	40/2563	198/30167	2.15e-07	8.12e-06	40	AT1G02390/AT1G17020/AT1G20900/AT1G30700/AT1G31040/AT1G32450/AT1G54570/AT1G69490/AT1G73220/AT1G76680/AT2G25460/AT2G31570/AT2G34610/AT2G35980/AT2G37750/AT2G39200/AT2G39730/AT2G44300/AT2G46950/AT3G05400/AT3G11340/AT3G14060/AT3G25882/AT3G60670/AT4G01870/AT4G02380/AT4G10500/AT4G15610/AT4G32940/AT5G24110/AT5G24530/AT5G25930/AT5G37600/AT5G44160/AT5G44610/AT5G52300/AT5G52310/AT5G56870/AT5G59220/AT5G63130
GO:0010150	leaf senescence	345	AT5G14490	anac085,NAC085	NOVEL	29/2545	198/30167	0.00249949	0.03357	29	AT1G01680/AT1G09176/AT1G11190/AT1G21000/AT1G34420/AT1G66880/AT1G73220/AT1G73500/AT1G76680/AT1G76980/AT2G13810/AT2G25460/AT2G30550/AT2G34610/AT2G44480/AT3G25010/AT3G25882/AT4G01870/AT4G02380/AT4G10500/AT4G12735/AT4G32940/AT5G24110/AT5G24530/AT5G25930/AT5G39050/AT5G52310/AT5G62165/AT5G63130
GO:0010150	leaf senescence	346	AT3G04420	anac048,NAC048	NOVEL	38/2557	198/30167	1.53e-06	4.91e-05	38	AT1G01680/AT1G02390/AT1G11190/AT1G30700/AT1G32450/AT1G54570/AT1G69490/AT1G73500/AT1G76680/AT1G76980/AT2G25460/AT2G25625/AT2G31570/AT2G34610/AT2G44300/AT3G11340/AT3G25010/AT3G25882/AT3G29035/AT3G56400/AT4G01870/AT4G02380/AT4G10500/AT4G12735/AT4G14365/AT4G15610/AT4G23810/AT4G32940/AT4G36040/AT5G03280/AT5G24110/AT5G24530/AT5G25930/AT5G37600/AT5G44160/AT5G52310/AT5G62165/AT5G63130
GO:0010150	leaf senescence	347	AT4G01540	ANAC068,NTM1	NOVEL	44/2550	198/30167	2.28e-09	1.33e-07	44	AT1G01680/AT1G02390/AT1G21000/AT1G30700/AT1G32450/AT1G36622/AT1G73220/AT1G73500/AT1G76680/AT2G13810/AT2G18690/AT2G22300/AT2G25460/AT2G34610/AT2G35980/AT2G39200/AT2G44300/AT2G44480/AT2G46950/AT3G10985/AT3G11340/AT3G22910/AT3G25010/AT3G25882/AT3G29035/AT3G56400/AT3G60670/AT4G01250/AT4G01870/AT4G02380/AT4G10500/AT4G12735/AT4G14370/AT4G15610/AT4G23810/AT4G36040/AT5G24110/AT5G24530/AT5G25930/AT5G52310…
GO:0010150	leaf senescence	348	AT2G33720	AT2G33720	NOVEL	30/2526	198/30167	0.00110818	0.0249198	30	AT1G01680/AT1G02390/AT1G11190/AT1G20180/AT1G36622/AT1G73220/AT1G73500/AT1G76680/AT1G76980/AT2G13810/AT2G18690/AT2G25460/AT2G30550/AT2G34610/AT2G39730/AT2G43000/AT2G46950/AT3G05400/AT3G25010/AT3G25882/AT4G02380/AT4G10500/AT4G15610/AT4G32940/AT5G24530/AT5G39050/AT5G52300/AT5G52310/AT5G62165/AT5G63130
GO:0010150	leaf senescence	349	AT5G65060	AGL70,FCL3,MAF3	NOVEL	37/2535	198/30167	3.28e-06	8.35e-05	37	AT1G02390/AT1G11190/AT1G21000/AT1G30700/AT1G32450/AT1G54570/AT1G66830/AT1G73220/AT1G73500/AT1G76680/AT2G25460/AT2G30550/AT2G31570/AT2G34610/AT2G37750/AT2G42540/AT2G44300/AT2G46950/AT3G05400/AT3G07350/AT3G11340/AT3G14060/AT3G29035/AT3G56400/AT4G01870/AT4G02380/AT4G15610/AT4G23810/AT4G32940/AT4G36040/AT5G24530/AT5G37600/AT5G52310/AT5G56870/AT5G59220/AT5G62165/AT5G63130
GO:0010150	leaf senescence	350	AT4G04450	AtWRKY42,WRKY42	NOVEL	36/2534	198/30167	8.32e-06	0.000235162	36	AT1G02390/AT1G11190/AT1G30700/AT1G32450/AT1G36622/AT1G54570/AT1G73220/AT1G76680/AT2G18690/AT2G25460/AT2G31570/AT2G34610/AT2G43000/AT2G44300/AT2G44480/AT3G05400/AT3G10985/AT3G25882/AT3G29035/AT3G60670/AT4G01250/AT4G01870/AT4G02380/AT4G10500/AT4G12735/AT4G15610/AT4G18980/AT4G23810/AT4G36040/AT5G24110/AT5G24530/AT5G25930/AT5G37600/AT5G44610/AT5G52310/AT5G62165
GO:0010150	leaf senescence	351	AT1G21340	AT1G21340	NOVEL	32/2516	198/30167	0.000226781	0.00424333	32	AT1G02390/AT1G11190/AT1G20180/AT1G30700/AT1G32450/AT1G73220/AT1G73500/AT1G76680/AT1G76980/AT2G13810/AT2G25460/AT2G30550/AT2G34610/AT2G39200/AT2G43000/AT2G46950/AT3G05400/AT3G25010/AT3G25882/AT4G01870/AT4G02380/AT4G10500/AT4G12735/AT4G15610/AT4G23810/AT4G32940/AT4G36040/AT5G37600/AT5G39050/AT5G44610/AT5G52310/AT5G63130
GO:0010150	leaf senescence	352	AT3G25730	EDF3	NOVEL	37/2508	198/30167	2.56e-06	8.14e-05	37	AT1G02390/AT1G11190/AT1G17020/AT1G20900/AT1G30700/AT1G31040/AT1G32450/AT1G54570/AT1G73220/AT1G76680/AT1G76980/AT2G18690/AT2G25460/AT2G31570/AT2G34610/AT2G37750/AT2G39200/AT2G44300/AT2G46950/AT3G05400/AT3G11340/AT3G14060/AT3G22910/AT3G25882/AT3G60670/AT4G01870/AT4G02380/AT4G10500/AT4G15610/AT4G23810/AT4G32940/AT5G24530/AT5G25930/AT5G37600/AT5G44610/AT5G52300/AT5G52310
GO:0010150	leaf senescence	353	AT3G25790	HHO1,NIGT1.3	NOVEL	28/2500	198/30167	0.00378516	0.0354274	28	AT1G02390/AT1G11190/AT1G30700/AT1G32450/AT1G73220/AT1G73500/AT1G76680/AT2G13810/AT2G25460/AT2G34610/AT2G44300/AT2G46950/AT3G60670/AT4G01870/AT4G02380/AT4G15610/AT4G23810/AT4G32940/AT4G36040/AT5G24110/AT5G24530/AT5G25930/AT5G37600/AT5G39050/AT5G44610/AT5G52310/AT5G56870/AT5G63130
GO:0010150	leaf senescence	354	AT3G23230	AtERF98,AtTDR1,ERF98,TDR1	NOVEL	47/2499	198/30167	3.09e-11	1.78e-09	47	AT1G01680/AT1G02390/AT1G09176/AT1G18210/AT1G32450/AT1G34420/AT1G36622/AT1G66880/AT1G73220/AT1G73500/AT1G76680/AT1G76980/AT2G13810/AT2G18690/AT2G22300/AT2G25460/AT2G25625/AT2G30550/AT2G31570/AT2G35980/AT2G39200/AT2G43000/AT2G44300/AT2G44480/AT2G46950/AT3G22910/AT3G25010/AT3G25882/AT3G50760/AT3G52430/AT4G01250/AT4G01870/AT4G02380/AT4G10500/AT4G12735/AT4G18980/AT4G23810/AT4G32940/AT4G36040/AT5G24110…
GO:0010150	leaf senescence	355	AT5G61430	ANAC100,ATNAC5,NAC100	NOVEL	31/2484	198/30167	0.000398239	0.00732594	31	AT1G20900/AT1G30700/AT1G31040/AT1G32450/AT1G54570/AT1G73220/AT1G73500/AT1G76680/AT2G34610/AT2G35980/AT2G44300/AT2G46950/AT3G05400/AT3G10985/AT3G11340/AT3G25010/AT3G25882/AT3G60670/AT4G01870/AT4G02380/AT4G15610/AT4G32940/AT5G25930/AT5G35110/AT5G39050/AT5G44160/AT5G44610/AT5G52300/AT5G52310/AT5G62165/AT5G63130
GO:0010150	leaf senescence	356	AT3G07340	CIB3	NOVEL	45/2504	198/30167	3.94e-10	1.46e-08	45	AT1G01680/AT1G02390/AT1G11190/AT1G20900/AT1G30700/AT1G32450/AT1G36622/AT1G54570/AT1G76680/AT1G76980/AT2G18690/AT2G25460/AT2G30550/AT2G31570/AT2G34610/AT2G37750/AT2G39200/AT2G43000/AT2G44300/AT2G46950/AT3G07350/AT3G11340/AT3G14060/AT3G22910/AT3G25882/AT3G26210/AT3G56400/AT4G01250/AT4G01870/AT4G02380/AT4G10500/AT4G12735/AT4G15610/AT4G23810/AT4G32940/AT5G24110/AT5G24530/AT5G25930/AT5G44160/AT5G44610…
GO:0010150	leaf senescence	357	AT1G50640	ATERF3,ERF3	NOVEL	43/2477	198/30167	3.03e-09	1.13e-07	43	AT1G01680/AT1G02390/AT1G11190/AT1G30700/AT1G31040/AT1G32450/AT1G54130/AT1G54570/AT1G69490/AT1G73220/AT1G73500/AT1G76680/AT2G13810/AT2G22300/AT2G25460/AT2G31570/AT2G35980/AT2G37750/AT2G44300/AT2G44480/AT2G46950/AT3G05400/AT3G11340/AT3G25882/AT3G60670/AT4G01870/AT4G02380/AT4G10500/AT4G12735/AT4G15610/AT4G23810/AT4G32940/AT5G24110/AT5G24530/AT5G25930/AT5G37600/AT5G44610/AT5G52310/AT5G56870/AT5G59220…
GO:0010150	leaf senescence	358	AT4G25470	ATCBF2,CBF2,DREB1C,FTQ4	NOVEL	47/2469	198/30167	2.04e-11	1.27e-09	47	AT1G01680/AT1G02390/AT1G09176/AT1G11190/AT1G21000/AT1G30700/AT1G32450/AT1G54130/AT1G66830/AT1G69490/AT1G73220/AT1G73500/AT2G13810/AT2G18690/AT2G25460/AT2G25625/AT2G30550/AT2G37750/AT2G39200/AT2G44300/AT2G46950/AT3G05400/AT3G07350/AT3G14060/AT3G25882/AT3G26210/AT3G50760/AT3G56400/AT4G01870/AT4G02380/AT4G10500/AT4G14365/AT4G15610/AT4G18980/AT4G23810/AT4G32940/AT4G36040/AT5G03280/AT5G24110/AT5G24530…
GO:0010150	leaf senescence	359	AT2G46400	ATWRKY46,WRKY46	NOVEL	46/2476	198/30167	7.98e-11	3.98e-09	46	AT1G01680/AT1G02390/AT1G21000/AT1G30700/AT1G32450/AT1G54040/AT1G66830/AT1G66880/AT1G69490/AT1G73500/AT1G76680/AT2G13810/AT2G18690/AT2G22300/AT2G25460/AT2G25625/AT2G30550/AT2G34610/AT2G43000/AT2G44300/AT2G44480/AT2G46950/AT3G05400/AT3G11340/AT3G22910/AT3G25882/AT3G50760/AT3G52430/AT3G56400/AT4G01870/AT4G02380/AT4G10500/AT4G14365/AT4G15610/AT4G18980/AT4G23810/AT4G32940/AT4G36040/AT5G24110/AT5G24530…
GO:0010150	leaf senescence	360	AT1G48000	AtMYB112,MYB112	NOVEL	40/2453	198/30167	6.73e-08	3.39e-06	40	AT1G01680/AT1G11190/AT1G21000/AT1G32450/AT1G66830/AT1G73220/AT1G73500/AT1G76680/AT1G76980/AT2G13810/AT2G22300/AT2G25625/AT2G34610/AT2G35980/AT2G44300/AT2G44480/AT3G05400/AT3G10985/AT3G14060/AT3G22910/AT3G25010/AT3G25882/AT3G43230/AT3G56400/AT4G01870/AT4G02380/AT4G10500/AT4G12735/AT4G18980/AT4G23810/AT4G32940/AT4G36040/AT5G24110/AT5G24530/AT5G25930/AT5G37600/AT5G52310/AT5G59220/AT5G62165/AT5G63130
GO:0010150	leaf senescence	361	AT3G29035	ANAC059,ATNAC3,NAC3,ORS1	KNOWN	55/2464	198/30167	2.81e-16	1.87e-14	55	AT1G02390/AT1G11190/AT1G13990/AT1G20900/AT1G21000/AT1G30700/AT1G31040/AT1G32450/AT1G54130/AT1G54570/AT1G66830/AT1G69490/AT1G73220/AT1G73500/AT1G76680/AT1G76980/AT2G18690/AT2G22300/AT2G25460/AT2G25625/AT2G31570/AT2G34610/AT2G35980/AT2G37750/AT2G39200/AT2G43000/AT2G44300/AT2G46950/AT3G05400/AT3G11340/AT3G14060/AT3G22910/AT3G25010/AT3G25882/AT3G26210/AT3G48020/AT3G56400/AT4G01870/AT4G02380/AT4G12735…
GO:0010150	leaf senescence	362	AT1G64105	ANAC027,NAC027	NOVEL	38/2445	198/30167	5.12e-07	2.39e-05	38	AT1G02390/AT1G20180/AT1G21000/AT1G32450/AT1G36622/AT1G54040/AT1G73220/AT1G73500/AT1G76680/AT1G76980/AT2G13810/AT2G22300/AT2G25460/AT2G25625/AT2G30550/AT2G31570/AT2G34610/AT2G37750/AT2G39200/AT2G43000/AT2G44300/AT2G46950/AT3G25010/AT3G25882/AT4G01870/AT4G02380/AT4G10500/AT4G12735/AT4G15610/AT4G23810/AT4G32940/AT4G36040/AT5G24530/AT5G25930/AT5G37600/AT5G52310/AT5G62165/AT5G63130
GO:0010150	leaf senescence	363	AT1G50600	SCL5	NOVEL	40/2451	198/30167	6.58e-08	2.08e-06	40	AT1G01680/AT1G02390/AT1G11190/AT1G30700/AT1G31040/AT1G32450/AT1G54130/AT1G54570/AT1G69490/AT1G73500/AT1G76680/AT2G13810/AT2G22300/AT2G25460/AT2G31570/AT2G34610/AT2G35980/AT2G37750/AT2G39200/AT2G44300/AT2G44480/AT2G46950/AT3G05400/AT3G11340/AT3G25882/AT3G60670/AT4G01870/AT4G02380/AT4G10500/AT4G15610/AT4G32940/AT5G24110/AT5G24530/AT5G25930/AT5G37600/AT5G44610/AT5G52310/AT5G62000/AT5G62165/AT5G64940
GO:0010150	leaf senescence	364	AT5G44160	AtIDD8,IDD8,NUC	KNOWN	33/2444	198/30167	5.76e-05	0.00119879	33	AT1G02390/AT1G17020/AT1G20900/AT1G30700/AT1G31040/AT1G32450/AT1G54570/AT1G73220/AT1G73500/AT1G76680/AT2G25460/AT2G34610/AT2G37750/AT2G44300/AT2G46950/AT3G05400/AT3G11340/AT3G14060/AT3G25882/AT3G60670/AT4G01870/AT4G02380/AT4G12735/AT4G15610/AT4G32940/AT4G36040/AT5G24530/AT5G44610/AT5G52300/AT5G52310/AT5G59220/AT5G63130/AT5G64940
GO:0010150	leaf senescence	365	AT4G37540	LBD39	NOVEL	34/2439	198/30167	2.29e-05	0.000509047	34	AT1G01680/AT1G02390/AT1G20900/AT1G30700/AT1G32450/AT1G54130/AT1G54570/AT1G73220/AT2G25460/AT2G31570/AT2G34610/AT2G37750/AT2G39200/AT2G43000/AT2G44300/AT2G46950/AT3G05400/AT3G07350/AT3G11340/AT3G14060/AT3G60670/AT4G01870/AT4G02380/AT4G10500/AT4G15610/AT4G23810/AT4G32940/AT5G24530/AT5G25930/AT5G44610/AT5G52300/AT5G52310/AT5G59220/AT5G63130
GO:0010150	leaf senescence	366	AT3G01080	ATWRKY58,WRKY58	NOVEL	43/2449	198/30167	2.15e-09	1.01e-07	43	AT1G01680/AT1G02390/AT1G13990/AT1G21000/AT1G32450/AT1G34420/AT1G36622/AT1G54040/AT1G54130/AT1G66830/AT1G66880/AT1G69490/AT1G73500/AT2G02710/AT2G13810/AT2G18690/AT2G22300/AT2G25460/AT2G30550/AT2G31570/AT3G14067/AT3G25010/AT3G25882/AT3G26210/AT3G50760/AT3G52430/AT3G56400/AT4G02380/AT4G15610/AT4G22750/AT4G23810/AT4G32940/AT4G36040/AT5G24110/AT5G24530/AT5G25930/AT5G37600/AT5G52310/AT5G56870/AT5G62000…
GO:0010150	leaf senescence	367	AT5G60440	AGL62	NOVEL	43/2427	198/30167	1.64e-09	1.45e-07	43	AT1G01680/AT1G02390/AT1G11190/AT1G21000/AT1G32450/AT1G34420/AT1G54130/AT1G66830/AT1G73220/AT1G73500/AT1G76680/AT2G13810/AT2G25460/AT2G25625/AT2G30550/AT2G34610/AT2G35980/AT2G42540/AT2G43000/AT2G44300/AT3G10985/AT3G11340/AT3G25010/AT3G25882/AT3G28100/AT3G52430/AT3G56400/AT4G01250/AT4G01870/AT4G02380/AT4G18980/AT4G23810/AT4G32940/AT4G36040/AT5G24110/AT5G24530/AT5G25930/AT5G37600/AT5G44160/AT5G52310…
GO:0010150	leaf senescence	368	AT2G23340	DEAR3	NOVEL	47/2442	198/30167	1.4e-11	7.79e-10	47	AT1G01680/AT1G02390/AT1G21000/AT1G30700/AT1G32450/AT1G36622/AT1G66880/AT1G69490/AT1G73500/AT1G76680/AT2G13790/AT2G18690/AT2G25460/AT2G25625/AT2G30550/AT2G31570/AT2G34610/AT2G39200/AT2G44300/AT2G44480/AT2G46950/AT3G07350/AT3G11340/AT3G14067/AT3G22910/AT3G25010/AT3G25882/AT3G48080/AT3G52430/AT3G56400/AT4G01870/AT4G02380/AT4G10500/AT4G14365/AT4G15610/AT4G18980/AT4G23810/AT4G32940/AT5G24530/AT5G25930…
GO:0010150	leaf senescence	369	AT5G08790	anac081,ATAF2	KNOWN	49/2436	198/30167	9.11e-13	4.09e-11	49	AT1G01680/AT1G02390/AT1G08050/AT1G11190/AT1G30700/AT1G32450/AT1G54570/AT1G69490/AT1G73500/AT1G76680/AT1G76980/AT2G18690/AT2G22300/AT2G25460/AT2G31570/AT2G37750/AT2G39200/AT2G39730/AT2G44300/AT2G44480/AT2G46950/AT3G10500/AT3G10985/AT3G11340/AT3G22910/AT3G25882/AT3G56400/AT3G60670/AT4G01250/AT4G01870/AT4G02380/AT4G10500/AT4G12735/AT4G14370/AT4G15610/AT4G23810/AT4G32940/AT4G36040/AT5G03280/AT5G24530…
GO:0010150	leaf senescence	370	AT3G10040	HRA1	NOVEL	27/2397	198/30167	0.00413711	0.0460599	27	AT1G02390/AT1G11190/AT1G30700/AT1G31040/AT1G32450/AT1G54570/AT1G73220/AT1G76680/AT2G34610/AT2G35980/AT2G39200/AT2G44300/AT2G46950/AT3G05400/AT3G11340/AT3G25882/AT3G60670/AT4G01870/AT4G02380/AT4G10500/AT4G15610/AT5G23950/AT5G37600/AT5G44160/AT5G44610/AT5G52300/AT5G52310
GO:0010150	leaf senescence	371	AT5G65100	AT5G65100	NOVEL	35/2404	198/30167	6.7e-06	0.000252399	35	AT1G01680/AT1G02390/AT1G11190/AT1G54130/AT1G73220/AT1G73500/AT1G76680/AT1G76980/AT2G13810/AT2G22300/AT2G25460/AT2G30550/AT2G34610/AT2G46950/AT3G05400/AT3G07350/AT3G10985/AT3G22910/AT3G25010/AT3G29035/AT4G01250/AT4G02380/AT4G15610/AT4G23810/AT4G32940/AT4G36040/AT5G24530/AT5G37600/AT5G39050/AT5G44610/AT5G52300/AT5G52310/AT5G62000/AT5G62165/AT5G63130
GO:0010150	leaf senescence	372	AT4G08250	AT4G08250	NOVEL	33/2383	198/30167	3.51e-05	0.000880546	33	AT1G01680/AT1G02390/AT1G11190/AT1G30700/AT1G32450/AT1G73220/AT1G73500/AT1G76680/AT2G13810/AT2G18690/AT2G25460/AT2G34610/AT2G35980/AT2G44300/AT2G44480/AT2G46950/AT3G05400/AT3G10985/AT3G11340/AT3G14060/AT3G22910/AT3G56400/AT3G60670/AT4G01870/AT4G02380/AT4G10500/AT4G15610/AT5G24530/AT5G25930/AT5G37600/AT5G51720/AT5G52310/AT5G56870
GO:0010150	leaf senescence	373	AT2G22750	AT2G22750	NOVEL	38/2396	198/30167	3.09e-07	1.38e-05	38	AT1G02390/AT1G05620/AT1G13990/AT1G18210/AT1G20180/AT1G21000/AT1G30700/AT1G54130/AT1G73220/AT1G73500/AT1G76680/AT1G76980/AT2G13810/AT2G25460/AT2G30550/AT2G31570/AT2G34610/AT2G39200/AT2G44480/AT2G46950/AT3G05400/AT3G07350/AT3G10985/AT3G43230/AT3G50760/AT4G01250/AT4G01870/AT4G02380/AT4G15610/AT4G30490/AT4G32940/AT4G36040/AT5G24530/AT5G25930/AT5G37600/AT5G52310/AT5G62165/AT5G63130
GO:0010150	leaf senescence	374	AT3G24050	GATA1	NOVEL	35/2388	198/30167	5.79e-06	0.000165034	35	AT1G02390/AT1G11190/AT1G30700/AT1G31040/AT1G32450/AT1G54040/AT1G54130/AT1G54570/AT1G69490/AT1G73220/AT1G76680/AT2G13810/AT2G22300/AT2G25460/AT2G35980/AT2G37750/AT2G44300/AT2G44480/AT2G46950/AT3G05400/AT3G11340/AT3G25882/AT4G01870/AT4G02380/AT4G10500/AT4G12735/AT4G15610/AT4G32940/AT5G24530/AT5G25930/AT5G37600/AT5G44610/AT5G52310/AT5G62000/AT5G62165
GO:0010150	leaf senescence	375	AT1G19850	ARF5,IAA24,MP	NOVEL	35/2381	198/30167	5.43e-06	0.000168348	35	AT1G02390/AT1G11190/AT1G17020/AT1G20900/AT1G30700/AT1G31040/AT1G32450/AT1G69490/AT1G73220/AT1G76680/AT2G13810/AT2G31570/AT2G34610/AT2G35980/AT2G44300/AT2G46950/AT3G05400/AT3G11340/AT3G22910/AT3G60670/AT4G01870/AT4G02380/AT4G10500/AT4G12735/AT4G15610/AT4G23810/AT4G32940/AT5G03280/AT5G24530/AT5G25930/AT5G44160/AT5G44610/AT5G52300/AT5G52310/AT5G59220
GO:0010150	leaf senescence	376	AT4G25440	ZFWD1	NOVEL	38/2390	198/30167	2.91e-07	8.93e-06	38	AT1G01680/AT1G02390/AT1G20900/AT1G32450/AT1G54040/AT1G54130/AT1G54570/AT1G76680/AT2G13810/AT2G22300/AT2G25460/AT2G31570/AT2G35980/AT2G37750/AT2G39200/AT2G44300/AT2G44480/AT2G46950/AT3G11340/AT3G25010/AT3G25882/AT4G01870/AT4G02380/AT4G10500/AT4G12735/AT4G15610/AT4G32940/AT4G36040/AT5G24530/AT5G25930/AT5G37600/AT5G44610/AT5G51720/AT5G52310/AT5G59220/AT5G62000/AT5G62165/AT5G64940
GO:0010150	leaf senescence	377	AT5G54680	bHLH105,ILR3	NOVEL	35/2380	198/30167	5.38e-06	0.00015174	35	AT1G01680/AT1G02390/AT1G11190/AT1G20900/AT1G30700/AT1G31040/AT1G32450/AT1G54130/AT1G54570/AT1G69490/AT1G73220/AT1G76680/AT2G13810/AT2G22300/AT2G35980/AT2G37750/AT2G39200/AT2G39730/AT2G44480/AT2G46950/AT3G05400/AT3G11340/AT3G25010/AT3G25882/AT4G10500/AT4G12735/AT4G15610/AT4G32940/AT5G24110/AT5G24530/AT5G25930/AT5G37600/AT5G44610/AT5G62000/AT5G62165
GO:0010150	leaf senescence	378	AT5G60130	AT5G60130	NOVEL	27/2353	198/30167	0.00322025	0.0487639	27	AT1G01680/AT1G02390/AT1G11190/AT1G54130/AT1G73220/AT1G76680/AT2G13810/AT2G25460/AT2G30550/AT2G34610/AT2G39730/AT2G46950/AT3G05400/AT3G11340/AT3G25882/AT4G18980/AT4G32940/AT5G24110/AT5G24530/AT5G25930/AT5G44610/AT5G52310/AT5G56870/AT5G62000/AT5G62165/AT5G63130/AT5G64940
GO:0010150	leaf senescence	379	AT5G18300	anac088,NAC088	NOVEL	28/2343	198/30167	0.00149902	0.0163162	28	AT1G02390/AT1G11190/AT1G21000/AT1G30700/AT1G31040/AT1G32450/AT1G73220/AT1G73500/AT1G76680/AT1G76980/AT2G25460/AT2G34610/AT2G37750/AT2G44300/AT2G46950/AT3G05400/AT3G10985/AT3G11340/AT3G22910/AT3G60670/AT4G01870/AT4G02380/AT4G15610/AT4G36040/AT5G44160/AT5G52310/AT5G59220/AT5G62165
GO:0010150	leaf senescence	380	AT1G74480	AtRKD2,RKD2,URP4	NOVEL	38/2355	198/30167	2e-07	1.32e-05	38	AT1G01680/AT1G02390/AT1G05620/AT1G18210/AT1G34420/AT1G66830/AT1G66880/AT1G69490/AT1G73500/AT1G76680/AT2G13810/AT2G22300/AT2G25460/AT2G30550/AT2G31570/AT2G34610/AT2G35980/AT2G39730/AT2G46950/AT3G10985/AT3G14067/AT3G25010/AT3G25882/AT3G28100/AT3G50760/AT3G56400/AT4G01870/AT4G23810/AT4G32940/AT5G24110/AT5G24530/AT5G25930/AT5G37600/AT5G52310/AT5G56870/AT5G62165/AT5G63130/AT5G64940
GO:0010150	leaf senescence	381	AT2G24790	ATCOL3,BBX4,COL3	NOVEL	34/2342	198/30167	9.85e-06	0.000253426	34	AT1G01680/AT1G02390/AT1G30700/AT1G31040/AT1G32450/AT1G54130/AT1G54570/AT1G69490/AT1G73220/AT1G73500/AT1G76680/AT2G13810/AT2G22300/AT2G25460/AT2G35980/AT2G37750/AT2G44300/AT2G46950/AT3G05400/AT3G11340/AT3G25882/AT3G56400/AT4G01870/AT4G10500/AT4G15610/AT4G23810/AT4G32940/AT5G24530/AT5G25930/AT5G37600/AT5G44610/AT5G52310/AT5G56870/AT5G62165
GO:0010150	leaf senescence	382	AT2G30130	ASL5,LBD12,PCK1	NOVEL	30/2327	198/30167	0.000290085	0.00412226	30	AT1G02390/AT1G11190/AT1G30700/AT1G32450/AT1G73220/AT1G73500/AT1G76680/AT1G76980/AT2G25460/AT2G34610/AT2G37750/AT2G39200/AT2G44300/AT2G46950/AT3G07350/AT3G11340/AT3G56400/AT3G60670/AT4G01870/AT4G02380/AT4G12735/AT4G15610/AT4G23810/AT5G24110/AT5G24530/AT5G44610/AT5G52300/AT5G52310/AT5G62165/AT5G63130
GO:0010150	leaf senescence	383	AT1G15720	TRFL5	NOVEL	26/2314	198/30167	0.00505026	0.0407265	26	AT1G01680/AT1G02390/AT1G30700/AT1G32450/AT1G69490/AT1G76680/AT2G25460/AT2G34610/AT2G39200/AT2G44300/AT2G46950/AT3G05400/AT3G11340/AT3G25010/AT4G01870/AT4G02380/AT4G10500/AT4G15610/AT4G23810/AT4G32940/AT5G24530/AT5G25930/AT5G44610/AT5G52300/AT5G52310/AT5G59220
GO:0010150	leaf senescence	384	AT5G06800	AT5G06800	NOVEL	30/2312	198/30167	0.00025994	0.00347669	30	AT1G02390/AT1G11190/AT1G20900/AT1G30700/AT1G32450/AT1G54570/AT1G76680/AT2G25625/AT2G31570/AT2G34610/AT2G35980/AT2G37750/AT2G39200/AT2G44300/AT3G05400/AT3G07350/AT3G11340/AT3G14060/AT3G60670/AT4G01870/AT4G02380/AT4G15610/AT4G23810/AT4G32940/AT4G36040/AT5G44160/AT5G44610/AT5G52310/AT5G59220/AT5G62165
GO:0010150	leaf senescence	385	AT1G77640	AT1G77640	NOVEL	35/2314	198/30167	2.89e-06	6.65e-05	35	AT1G02390/AT1G11190/AT1G30700/AT1G32450/AT1G73220/AT1G73500/AT1G76680/AT2G13810/AT2G18690/AT2G25460/AT2G31570/AT2G34610/AT2G44300/AT2G46950/AT3G05400/AT3G11340/AT3G22910/AT3G25882/AT3G56400/AT3G60670/AT4G01250/AT4G01870/AT4G02380/AT4G10500/AT4G12735/AT4G14365/AT4G15610/AT4G23810/AT4G32940/AT4G36040/AT5G24110/AT5G24530/AT5G25930/AT5G52310/AT5G62165
GO:0010150	leaf senescence	386	AT1G02220	ANAC003,NAC003	NOVEL	31/2298	198/30167	0.000101252	0.00214401	31	AT1G01680/AT1G11190/AT1G30700/AT1G31040/AT1G32450/AT1G66830/AT1G73220/AT1G76680/AT2G13810/AT2G25460/AT2G34610/AT2G39200/AT2G44300/AT2G44480/AT2G46950/AT3G05400/AT3G11340/AT3G22910/AT3G25010/AT3G25882/AT4G01870/AT4G02380/AT4G10500/AT4G12735/AT4G15610/AT4G32940/AT4G36040/AT5G24530/AT5G25930/AT5G52310/AT5G62165
GO:0010150	leaf senescence	387	AT1G04445	AT1G04445	NOVEL	33/2284	198/30167	1.5e-05	0.000562122	33	AT1G01680/AT1G02390/AT1G11190/AT1G21000/AT1G30700/AT1G32450/AT1G73220/AT1G73500/AT1G76680/AT2G13810/AT2G18690/AT2G25460/AT2G30550/AT2G34610/AT2G39200/AT2G43000/AT2G44300/AT2G44480/AT2G46950/AT3G05400/AT3G25010/AT3G25882/AT3G56400/AT4G01870/AT4G02380/AT4G15610/AT4G23810/AT4G32940/AT4G36040/AT5G24530/AT5G52310/AT5G56870/AT5G62165
GO:0010150	leaf senescence	388	AT1G32240	KAN2	NOVEL	31/2305	198/30167	0.000106991	0.00194812	31	AT1G02390/AT1G11190/AT1G17020/AT1G20900/AT1G30700/AT1G32450/AT1G36622/AT1G73220/AT1G76680/AT2G25460/AT2G31570/AT2G34610/AT2G35980/AT2G39200/AT2G43000/AT2G44300/AT2G46950/AT3G05400/AT3G11340/AT3G14060/AT4G01870/AT4G02380/AT4G10500/AT4G15610/AT4G23810/AT5G25930/AT5G44160/AT5G52300/AT5G52310/AT5G62165/AT5G63130
GO:0010150	leaf senescence	389	AT2G01570	RGA,RGA1,RGA24	NOVEL	36/2303	198/30167	9.46e-07	3.11e-05	36	AT1G01680/AT1G02390/AT1G11190/AT1G30700/AT1G31040/AT1G32450/AT1G54130/AT1G54570/AT1G69490/AT1G73220/AT1G76680/AT2G13810/AT2G22300/AT2G25460/AT2G31570/AT2G35980/AT2G39200/AT2G44300/AT2G46950/AT3G05400/AT3G11340/AT3G25010/AT3G25882/AT4G01870/AT4G10500/AT4G15610/AT4G23810/AT4G32940/AT5G24110/AT5G24530/AT5G25930/AT5G37600/AT5G44610/AT5G52310/AT5G62000/AT5G62165
GO:0010150	leaf senescence	390	AT3G53310	AT3G53310	NOVEL	39/2294	198/30167	3.38e-08	1.65e-06	39	AT1G01680/AT1G02390/AT1G11190/AT1G13990/AT1G21000/AT1G32450/AT1G54130/AT1G66830/AT1G66880/AT1G69490/AT1G73220/AT1G73500/AT2G13810/AT2G18690/AT2G22300/AT2G25460/AT2G30550/AT2G46950/AT3G05400/AT3G14067/AT3G25010/AT3G25882/AT3G52430/AT3G56400/AT4G02380/AT4G10500/AT4G14365/AT4G23810/AT4G32940/AT5G03280/AT5G24110/AT5G24530/AT5G25930/AT5G37600/AT5G52310/AT5G62000/AT5G62165/AT5G63130/AT5G64940
GO:0010150	leaf senescence	391	AT5G51870	AGL71	NOVEL	35/2253	198/30167	1.59e-06	7.45e-05	35	AT1G01680/AT1G02390/AT1G21000/AT1G32450/AT1G54130/AT1G66880/AT1G73220/AT1G73500/AT1G76680/AT1G76980/AT2G13810/AT2G25460/AT2G30550/AT2G34610/AT2G35980/AT2G39200/AT2G43000/AT2G44300/AT2G46950/AT3G10985/AT3G14067/AT3G25010/AT3G25882/AT3G28100/AT3G50760/AT4G02380/AT4G32940/AT4G36040/AT5G24530/AT5G25930/AT5G52310/AT5G56870/AT5G62165/AT5G63130/AT5G64230
GO:0010150	leaf senescence	392	AT1G47760	AGL102	NOVEL	27/2237	198/30167	0.00158686	0.0274394	27	AT1G01680/AT1G11190/AT1G18210/AT1G21000/AT1G32450/AT1G54570/AT1G73220/AT1G73500/AT1G76680/AT2G13810/AT2G31570/AT2G34610/AT2G44480/AT2G46950/AT3G05400/AT3G10985/AT3G25010/AT3G25882/AT4G01870/AT4G02380/AT4G10500/AT4G32940/AT4G36040/AT5G52300/AT5G52310/AT5G62165/AT5G63130
GO:0010150	leaf senescence	393	AT1G34370	AtSTOP1,STOP1	NOVEL	42/2262	198/30167	6.56e-10	3.29e-08	42	AT1G01680/AT1G02390/AT1G30700/AT1G31040/AT1G32450/AT1G54040/AT1G54130/AT1G54570/AT1G64140/AT1G69490/AT1G73500/AT1G76680/AT2G13810/AT2G18690/AT2G22300/AT2G25460/AT2G35980/AT2G39730/AT2G44300/AT2G44480/AT2G46950/AT3G05400/AT3G11340/AT3G14060/AT3G25010/AT3G25882/AT4G01870/AT4G02380/AT4G10500/AT4G12735/AT4G15610/AT4G23810/AT4G32940/AT5G24110/AT5G24530/AT5G25930/AT5G37600/AT5G44610/AT5G52310/AT5G56870…
GO:0010150	leaf senescence	394	AT5G49520	ATWRKY48,WRKY48	NOVEL	44/2268	198/30167	5.71e-11	2.8e-09	44	AT1G02390/AT1G11190/AT1G18210/AT1G30700/AT1G32450/AT1G36622/AT1G73500/AT1G76680/AT2G13810/AT2G18690/AT2G22300/AT2G25460/AT2G31570/AT2G34610/AT2G35980/AT2G39200/AT2G44300/AT2G44480/AT2G46950/AT3G05400/AT3G11340/AT3G14060/AT3G22910/AT3G25882/AT3G56400/AT3G60670/AT4G01870/AT4G02380/AT4G10500/AT4G12735/AT4G14365/AT4G14370/AT4G15610/AT4G23810/AT4G32940/AT5G24110/AT5G24530/AT5G25930/AT5G52300/AT5G52310…
GO:0010150	leaf senescence	395	AT3G13850	AT3G13850	NOVEL	38/2239	198/30167	5.5e-08	3.76e-06	38	AT1G01680/AT1G02390/AT1G11190/AT1G21000/AT1G32450/AT1G34420/AT1G36622/AT1G66880/AT1G73220/AT1G73500/AT1G76680/AT2G13810/AT2G18690/AT2G25460/AT2G30550/AT2G35980/AT2G43000/AT2G46950/AT3G05400/AT3G14067/AT3G22910/AT3G25010/AT3G25882/AT3G50760/AT4G01870/AT4G02380/AT4G10500/AT4G23810/AT4G32940/AT5G24110/AT5G24530/AT5G25930/AT5G37600/AT5G44610/AT5G52310/AT5G56870/AT5G62165/AT5G63130
GO:0010150	leaf senescence	396	AT1G52890	ANAC019,ANAC19,NAC019	NOVEL	36/2253	198/30167	5.64e-07	1.97e-05	36	AT1G01680/AT1G02390/AT1G21000/AT1G32450/AT1G34420/AT1G36622/AT1G54130/AT1G66830/AT1G66880/AT1G69490/AT1G73500/AT1G76680/AT2G13810/AT2G25460/AT2G34610/AT2G44300/AT3G07350/AT3G10985/AT3G25010/AT3G25882/AT3G26210/AT4G01870/AT4G02380/AT4G10500/AT4G15610/AT4G18980/AT4G23810/AT4G32940/AT4G36040/AT5G24110/AT5G24530/AT5G25930/AT5G52310/AT5G59220/AT5G62165/AT5G63130
GO:0010150	leaf senescence	397	AT2G45660	AGL20,ATSOC1,SOC1	NOVEL	36/2247	198/30167	5.29e-07	3.01e-05	36	AT1G01680/AT1G02390/AT1G11190/AT1G18210/AT1G21000/AT1G32450/AT1G66830/AT1G69490/AT1G73220/AT1G73500/AT1G76680/AT2G13810/AT2G25460/AT2G30550/AT2G31570/AT2G39200/AT2G46950/AT3G25882/AT3G28100/AT4G01250/AT4G01870/AT4G15610/AT4G18980/AT4G23810/AT4G32940/AT4G36040/AT5G24110/AT5G24530/AT5G25930/AT5G37600/AT5G52300/AT5G52310/AT5G56870/AT5G59220/AT5G62165/AT5G63130
GO:0010150	leaf senescence	398	AT4G10350	ANAC070,BRN2,NAC070	NOVEL	31/2230	198/30167	5.83e-05	0.00112521	31	AT1G02390/AT1G11190/AT1G30700/AT1G32450/AT1G73220/AT1G73500/AT1G76680/AT1G76980/AT2G13810/AT2G18690/AT2G25460/AT2G34610/AT2G37750/AT2G39200/AT2G44300/AT2G46950/AT3G26210/AT3G29035/AT3G56400/AT4G01870/AT4G02380/AT4G15610/AT4G23810/AT5G03280/AT5G24110/AT5G24530/AT5G25930/AT5G44610/AT5G52310/AT5G62165/AT5G63130
GO:0010150	leaf senescence	399	AT4G32040	KNAT5	NOVEL	36/2241	198/30167	4.96e-07	1.38e-05	36	AT1G01680/AT1G02390/AT1G30700/AT1G32450/AT1G54130/AT1G54570/AT1G73220/AT1G76680/AT2G13810/AT2G18690/AT2G22300/AT2G25460/AT2G31570/AT2G37750/AT2G39200/AT2G44300/AT2G44480/AT2G46950/AT3G05400/AT3G07350/AT3G11340/AT3G25882/AT3G56400/AT4G01870/AT4G02380/AT4G10500/AT4G15610/AT4G32940/AT5G24530/AT5G25930/AT5G37600/AT5G44610/AT5G52310/AT5G62000/AT5G62165/AT5G64940
GO:0010150	leaf senescence	400	AT4G17490	ATERF6,ERF-6-6,ERF6	NOVEL	33/2242	198/30167	1.03e-05	0.000181106	33	AT1G01680/AT1G02390/AT1G11190/AT1G30700/AT1G32450/AT1G73500/AT1G76680/AT2G18690/AT2G22300/AT2G25460/AT2G30550/AT2G31570/AT2G35980/AT2G44300/AT2G46950/AT3G14060/AT3G22910/AT3G25882/AT3G50760/AT3G56400/AT4G01870/AT4G02380/AT4G10500/AT4G14365/AT4G15610/AT4G23810/AT4G32940/AT5G24530/AT5G25930/AT5G44610/AT5G52310/AT5G59220/AT5G63130
GO:0010150	leaf senescence	401	AT1G74930	ORA47	NOVEL	46/2251	198/30167	3.16e-12	2.41e-10	46	AT1G01680/AT1G02390/AT1G11190/AT1G21000/AT1G30700/AT1G32450/AT1G36622/AT1G66880/AT1G69490/AT1G73500/AT2G13810/AT2G18690/AT2G22300/AT2G25460/AT2G25625/AT2G30550/AT2G31570/AT2G37750/AT2G39730/AT2G44300/AT2G46950/AT3G14060/AT3G14067/AT3G25010/AT3G25882/AT3G26210/AT3G43230/AT3G52430/AT3G56400/AT4G01870/AT4G02380/AT4G10500/AT4G14365/AT4G15610/AT4G18980/AT4G23810/AT4G32940/AT5G24110/AT5G25930/AT5G37600…
GO:0010150	leaf senescence	402	AT5G56840	AT5G56840	NOVEL	30/2229	198/30167	0.000138289	0.00299741	30	AT1G01680/AT1G02390/AT1G18210/AT1G32450/AT1G36622/AT1G54130/AT1G69490/AT1G73500/AT1G76680/AT2G18690/AT2G22300/AT2G44480/AT2G46950/AT3G05400/AT3G10985/AT3G25010/AT3G25882/AT3G56400/AT4G02380/AT4G10500/AT4G23810/AT4G32940/AT4G36040/AT5G24530/AT5G25930/AT5G37600/AT5G52310/AT5G62000/AT5G62165/AT5G63130
GO:0010150	leaf senescence	403	AT1G34190	anac017,NAC017,RAO2	KNOWN	36/2228	198/30167	4.32e-07	1.23e-05	36	AT1G01680/AT1G02390/AT1G11190/AT1G30700/AT1G31040/AT1G32450/AT1G54570/AT1G69490/AT1G73220/AT1G76680/AT2G13810/AT2G22300/AT2G25460/AT2G35980/AT2G44300/AT2G44480/AT2G46950/AT3G05400/AT3G11340/AT3G25010/AT3G25882/AT4G01870/AT4G02380/AT4G10500/AT4G12735/AT4G15610/AT4G23810/AT4G32940/AT5G24530/AT5G25930/AT5G37600/AT5G44610/AT5G52310/AT5G62000/AT5G62165/AT5G64940
GO:0010150	leaf senescence	404	AT3G49930	AT3G49930	NOVEL	34/2237	198/30167	3.7e-06	7.47e-05	34	AT1G02390/AT1G11190/AT1G30700/AT1G32450/AT1G54570/AT1G66830/AT1G73220/AT1G73500/AT1G76680/AT2G18690/AT2G25460/AT2G34610/AT2G37750/AT2G43000/AT2G44300/AT2G44480/AT2G46950/AT3G11340/AT3G29035/AT3G56400/AT4G01250/AT4G01870/AT4G02380/AT4G15610/AT4G18980/AT4G23810/AT4G30490/AT4G32940/AT4G36040/AT5G24110/AT5G24530/AT5G25930/AT5G52310/AT5G63130
GO:0010150	leaf senescence	405	AT5G17300	RVE1	NOVEL	36/2218	198/30167	3.88e-07	1.53e-05	36	AT1G02390/AT1G09176/AT1G11190/AT1G21000/AT1G30700/AT1G32450/AT1G54570/AT1G73220/AT1G76680/AT2G22300/AT2G25460/AT2G25625/AT2G34610/AT2G39200/AT2G39730/AT2G44300/AT2G46950/AT3G11340/AT3G14060/AT3G22910/AT3G60670/AT4G01870/AT4G02380/AT4G10500/AT4G12735/AT4G15610/AT4G23810/AT4G32940/AT5G03280/AT5G24530/AT5G25930/AT5G44610/AT5G52310/AT5G59220/AT5G62165/AT5G64940
GO:0010150	leaf senescence	406	AT5G46350	ATWRKY8,WRKY8	NOVEL	39/2238	198/30167	1.74e-08	6.1e-07	39	AT1G01680/AT1G02390/AT1G13990/AT1G21000/AT1G30700/AT1G32450/AT1G36622/AT1G66830/AT1G69490/AT1G76680/AT1G76980/AT2G13810/AT2G18690/AT2G22300/AT2G25460/AT2G30550/AT2G31570/AT2G39200/AT2G43000/AT3G07350/AT3G10985/AT3G25010/AT3G25882/AT3G26210/AT3G29035/AT3G56400/AT4G01250/AT4G02380/AT4G15610/AT4G23810/AT4G32940/AT4G36040/AT5G24110/AT5G24530/AT5G25930/AT5G37600/AT5G51720/AT5G52310/AT5G62165
GO:0010150	leaf senescence	407	AT1G02230	ANAC004,NAC004	KNOWN	34/2207	198/30167	2.75e-06	8.26e-05	34	AT1G01680/AT1G02390/AT1G11190/AT1G32450/AT1G73220/AT1G73500/AT1G76680/AT1G76980/AT2G13810/AT2G18690/AT2G25460/AT2G34610/AT2G35980/AT2G44300/AT2G44480/AT2G46950/AT3G05400/AT3G10985/AT3G11340/AT3G22910/AT3G25882/AT4G01870/AT4G02380/AT4G10500/AT4G15610/AT4G23810/AT4G32940/AT4G36040/AT5G24530/AT5G25930/AT5G37600/AT5G44160/AT5G44610/AT5G52310
GO:0010150	leaf senescence	408	AT5G66730	ENY,IDD1	NOVEL	36/2212	198/30167	3.64e-07	1.12e-05	36	AT1G01680/AT1G02390/AT1G11190/AT1G30700/AT1G32450/AT1G54130/AT1G54570/AT1G69490/AT1G73220/AT1G76680/AT2G13810/AT2G22300/AT2G25460/AT2G31570/AT2G35980/AT2G39730/AT2G44300/AT2G44480/AT2G46950/AT3G05400/AT3G11340/AT3G25882/AT3G60670/AT4G01870/AT4G02380/AT4G10500/AT4G15610/AT4G23810/AT4G32940/AT5G24530/AT5G25930/AT5G37600/AT5G44610/AT5G52310/AT5G62000/AT5G62165
GO:0010150	leaf senescence	409	AT1G54060	ASIL1	NOVEL	33/2211	198/30167	7.69e-06	0.000171265	33	AT1G01680/AT1G02390/AT1G11190/AT1G30700/AT1G32450/AT1G54130/AT1G54570/AT1G69490/AT1G73220/AT1G76680/AT2G13810/AT2G22300/AT2G35980/AT2G39730/AT2G44300/AT2G44480/AT2G46950/AT3G05400/AT3G11340/AT3G25882/AT4G01870/AT4G02380/AT4G10500/AT4G15610/AT4G23810/AT4G32940/AT5G24530/AT5G25930/AT5G37600/AT5G44610/AT5G52310/AT5G62000/AT5G62165
GO:0010150	leaf senescence	410	AT3G52440	AT3G52440	NOVEL	32/2190	198/30167	1.65e-05	0.000641924	32	AT1G01680/AT1G02390/AT1G11190/AT1G18210/AT1G54040/AT1G73220/AT1G73500/AT1G76680/AT2G25460/AT2G30550/AT2G34610/AT2G43000/AT2G46950/AT3G10985/AT3G25010/AT3G25882/AT4G01250/AT4G01870/AT4G02380/AT4G10500/AT4G12735/AT4G15610/AT4G23810/AT4G32940/AT4G36040/AT5G24110/AT5G24530/AT5G25930/AT5G37600/AT5G52310/AT5G62165/AT5G63130
GO:0010150	leaf senescence	411	AT5G48250	BBX8	NOVEL	34/2204	198/30167	2.67e-06	8.12e-05	34	AT1G02390/AT1G11190/AT1G20900/AT1G30700/AT1G32450/AT1G54570/AT1G73500/AT1G76680/AT2G18690/AT2G25460/AT2G34610/AT2G37750/AT2G39200/AT2G44300/AT2G44480/AT2G46950/AT3G05400/AT3G11340/AT3G14060/AT3G25882/AT3G56400/AT3G60670/AT4G01870/AT4G02380/AT4G10500/AT4G15610/AT4G23810/AT4G32940/AT4G36040/AT5G24530/AT5G25930/AT5G37600/AT5G44610/AT5G52310
GO:0010150	leaf senescence	412	AT2G28160	ATBHLH029,ATBHLH29,ATFIT1,BHLH029,FIT,FIT1,FRU	NOVEL	36/2197	198/30167	3.09e-07	8.86e-06	36	AT1G02390/AT1G11190/AT1G17020/AT1G30700/AT1G32450/AT1G54570/AT1G73500/AT1G76680/AT1G76980/AT2G13810/AT2G18690/AT2G25460/AT2G34610/AT2G35980/AT2G37750/AT2G44300/AT2G44480/AT2G46950/AT3G05400/AT3G11340/AT3G25882/AT3G60670/AT4G01870/AT4G02380/AT4G10500/AT4G12735/AT4G15610/AT4G32940/AT5G24530/AT5G25930/AT5G37600/AT5G44160/AT5G44610/AT5G52310/AT5G62165/AT5G63130
GO:0010150	leaf senescence	413	AT4G35040	AtbZIP19,bZIP19	NOVEL	35/2205	198/30167	9.7e-07	2.61e-05	35	AT1G02390/AT1G11190/AT1G30700/AT1G32450/AT1G54040/AT1G54130/AT1G54570/AT1G73220/AT1G76680/AT2G13810/AT2G22300/AT2G25460/AT2G31570/AT2G35980/AT2G37750/AT2G39200/AT2G44300/AT2G46950/AT3G05400/AT3G11340/AT3G25882/AT4G01870/AT4G02380/AT4G10500/AT4G12735/AT4G15610/AT4G32940/AT5G24530/AT5G25930/AT5G37600/AT5G44610/AT5G52310/AT5G62000/AT5G62165/AT5G64940
GO:0010150	leaf senescence	414	AT1G75540	AtBBX21,BBX21,LHUS,STH2	NOVEL	37/2218	198/30167	1.31e-07	3.57e-06	37	AT1G01680/AT1G02390/AT1G08050/AT1G11190/AT1G20900/AT1G30700/AT1G32450/AT1G54130/AT1G54570/AT1G64140/AT1G69490/AT1G73500/AT1G76680/AT2G18690/AT2G25460/AT2G31570/AT2G37750/AT2G39200/AT2G39730/AT2G44300/AT2G46950/AT3G10500/AT3G25882/AT4G01870/AT4G02380/AT4G15610/AT4G23810/AT4G32940/AT5G24530/AT5G25930/AT5G39050/AT5G44160/AT5G44610/AT5G52310/AT5G56870/AT5G59220/AT5G63130
GO:0010150	leaf senescence	415	AT3G62090	PIF6,PIL2	NOVEL	30/2184	198/30167	9.65e-05	0.00231204	30	AT1G11190/AT1G18210/AT1G20900/AT1G21000/AT1G31040/AT1G32450/AT1G54570/AT1G73220/AT1G73500/AT1G76680/AT2G25460/AT2G34610/AT2G35980/AT2G44300/AT2G46950/AT3G05400/AT3G25882/AT3G56860/AT3G60670/AT4G01870/AT4G02380/AT4G10500/AT4G12735/AT4G15610/AT4G32940/AT4G36040/AT5G44160/AT5G52300/AT5G52310/AT5G59220
GO:0010150	leaf senescence	416	AT5G04410	anac078,NAC2,NAC78,NTL11	NOVEL	37/2196	198/30167	1.02e-07	3.24e-06	37	AT1G01680/AT1G02390/AT1G11190/AT1G20900/AT1G30700/AT1G31040/AT1G32450/AT1G54130/AT1G54570/AT1G69490/AT1G76680/AT2G13810/AT2G18690/AT2G22300/AT2G25460/AT2G35980/AT2G37750/AT2G44300/AT2G46950/AT3G05400/AT3G11340/AT3G25010/AT3G25882/AT4G01870/AT4G02380/AT4G10500/AT4G12735/AT4G15610/AT4G32940/AT5G24110/AT5G24530/AT5G25930/AT5G37600/AT5G44610/AT5G52310/AT5G62000/AT5G62165
GO:0010150	leaf senescence	417	AT3G16857	ARR1,RR1	NOVEL	37/2194	198/30167	9.99e-08	3.01e-06	37	AT1G02390/AT1G11190/AT1G30700/AT1G31040/AT1G32450/AT1G54130/AT1G54570/AT1G69490/AT1G76680/AT2G13810/AT2G18690/AT2G22300/AT2G25460/AT2G31570/AT2G35980/AT2G39200/AT2G44300/AT2G46950/AT3G05400/AT3G11340/AT3G25882/AT4G01870/AT4G02380/AT4G10500/AT4G12735/AT4G15610/AT4G23810/AT4G32940/AT5G24530/AT5G25930/AT5G37600/AT5G39050/AT5G44610/AT5G52310/AT5G62000/AT5G62165/AT5G64940
GO:0010150	leaf senescence	418	AT2G36400	AtGRF3,GRF3	NOVEL	33/2182	198/30167	5.83e-06	0.000210027	33	AT1G01680/AT1G02390/AT1G20900/AT1G30700/AT1G31040/AT1G32450/AT1G54130/AT1G69490/AT1G73220/AT1G76680/AT2G25460/AT2G31570/AT2G34610/AT2G37750/AT2G42540/AT2G44300/AT2G46950/AT3G11340/AT3G14060/AT3G22910/AT3G25010/AT3G29035/AT3G60670/AT4G01870/AT4G02380/AT4G15610/AT4G32940/AT5G25930/AT5G37600/AT5G44610/AT5G52310/AT5G56870/AT5G62165
GO:0010150	leaf senescence	419	AT4G28610	AtPHR1,PHR1	NOVEL	26/2186	198/30167	0.00237754	0.024157	26	AT1G02390/AT1G11190/AT1G30700/AT1G32450/AT1G54570/AT1G69490/AT1G73220/AT1G76680/AT2G13810/AT2G25460/AT2G39200/AT2G44300/AT2G46950/AT3G05400/AT3G11340/AT3G25882/AT4G01870/AT4G10500/AT4G15610/AT4G32940/AT5G24530/AT5G25930/AT5G37600/AT5G44610/AT5G52310/AT5G62165
GO:0010150	leaf senescence	420	AT5G14960	DEL2,E2FD,E2L1	NOVEL	28/2180	198/30167	0.000499743	0.00817503	28	AT1G02390/AT1G21000/AT1G30700/AT1G32450/AT1G54130/AT1G66830/AT1G73220/AT1G73500/AT1G76680/AT2G18690/AT2G25460/AT2G34610/AT2G44300/AT2G44480/AT2G46950/AT3G11340/AT3G14060/AT4G01870/AT4G02380/AT4G15610/AT4G23810/AT4G32940/AT4G36040/AT5G03280/AT5G24110/AT5G52310/AT5G56870/AT5G62165
GO:0010150	leaf senescence	421	AT1G06160	ERF59,ORA59	NOVEL	39/2169	198/30167	7.41e-09	3.36e-07	39	AT1G01680/AT1G11190/AT1G13990/AT1G18210/AT1G21000/AT1G32450/AT1G34420/AT1G54130/AT1G54570/AT1G66830/AT1G73500/AT2G13790/AT2G22300/AT2G25460/AT2G35980/AT2G42540/AT2G43570/AT2G44300/AT3G07350/AT3G10985/AT3G25882/AT3G56400/AT3G56860/AT4G01250/AT4G01870/AT4G02380/AT4G10500/AT4G12735/AT4G14365/AT4G15610/AT4G23810/AT4G32940/AT4G36040/AT5G24530/AT5G25930/AT5G52310/AT5G56870/AT5G62000/AT5G63130
GO:0010150	leaf senescence	422	AT2G04038	AtbZIP48,bZIP48	NOVEL	28/2167	198/30167	0.000454808	0.0100656	28	AT1G01680/AT1G02390/AT1G11190/AT1G21000/AT1G32450/AT1G73220/AT1G73500/AT1G76680/AT1G76980/AT2G13810/AT2G25460/AT2G34610/AT2G44300/AT2G46950/AT3G10985/AT3G25010/AT3G25882/AT4G01870/AT4G02380/AT4G22750/AT4G23810/AT4G32940/AT4G36040/AT5G24530/AT5G25930/AT5G52310/AT5G62165/AT5G63130
GO:0010150	leaf senescence	423	AT5G27130	AGL39	NOVEL	27/2153	198/30167	0.000907866	0.02078	27	AT1G02390/AT1G11190/AT1G20180/AT1G32450/AT1G54130/AT1G66830/AT1G73220/AT1G73500/AT1G76680/AT2G13810/AT2G22300/AT2G25460/AT2G25625/AT2G30550/AT2G31570/AT2G43000/AT3G25010/AT4G01870/AT4G02380/AT4G12735/AT4G15610/AT4G32940/AT5G24530/AT5G25930/AT5G39050/AT5G52310/AT5G62165
GO:0010150	leaf senescence	424	AT1G07900	LBD1	NOVEL	36/2173	198/30167	2.37e-07	1.17e-05	36	AT1G01680/AT1G02390/AT1G11190/AT1G30700/AT1G32450/AT1G36622/AT1G66830/AT1G66880/AT1G69490/AT1G73220/AT1G73500/AT1G76680/AT2G13810/AT2G18690/AT2G22300/AT2G25460/AT2G34610/AT2G44300/AT3G05400/AT3G25882/AT3G29035/AT3G60670/AT4G01870/AT4G02380/AT4G10500/AT4G23810/AT4G32940/AT5G24110/AT5G24530/AT5G25930/AT5G44610/AT5G52310/AT5G56870/AT5G62000/AT5G62165/AT5G64940
GO:0010150	leaf senescence	425	AT5G52830	ATWRKY27,WRKY27	NOVEL	31/2161	198/30167	3.24e-05	0.000662781	31	AT1G02390/AT1G20900/AT1G30700/AT1G32450/AT1G73220/AT1G76680/AT2G22300/AT2G25460/AT2G31570/AT2G34610/AT2G35980/AT2G44300/AT2G46950/AT3G05400/AT3G11340/AT3G14060/AT3G22910/AT3G60670/AT4G01870/AT4G10500/AT4G15610/AT4G32940/AT5G24530/AT5G25930/AT5G44160/AT5G44610/AT5G52300/AT5G52310/AT5G56870/AT5G62165/AT5G63130
GO:0010150	leaf senescence	426	AT5G52260	AtMYB19,MYB19	NOVEL	28/2169	198/30167	0.000461479	0.00585107	28	AT1G01680/AT1G05620/AT1G11190/AT1G54130/AT1G73220/AT1G76680/AT1G76980/AT2G13810/AT2G25460/AT2G31570/AT2G34610/AT2G37750/AT3G07350/AT3G10985/AT3G11340/AT3G25010/AT3G29035/AT4G02380/AT4G15610/AT4G32940/AT4G36040/AT5G24530/AT5G37600/AT5G39050/AT5G52310/AT5G56870/AT5G62165/AT5G63130
GO:0010150	leaf senescence	427	AT1G29560	AT1G29560	NOVEL	30/2176	198/30167	9.04e-05	0.00183579	30	AT1G02390/AT1G05620/AT1G11190/AT1G18210/AT1G30700/AT1G32450/AT1G73500/AT1G76680/AT2G25460/AT2G39200/AT2G42540/AT2G44300/AT2G46950/AT3G10985/AT3G11340/AT3G14060/AT3G56400/AT4G01250/AT4G01870/AT4G02380/AT4G23810/AT4G32940/AT4G36040/AT5G37600/AT5G44160/AT5G51720/AT5G52310/AT5G59220/AT5G62165/AT5G63130
GO:0010150	leaf senescence	428	AT1G49950	ATTRB1,TRB1	NOVEL	35/2164	198/30167	6.29e-07	2.26e-05	35	AT1G01680/AT1G02390/AT1G11190/AT1G30700/AT1G31040/AT1G32450/AT1G54040/AT1G54570/AT1G69490/AT1G73220/AT1G76680/AT2G13810/AT2G25460/AT2G35980/AT2G39200/AT2G44300/AT2G44480/AT2G46950/AT3G05400/AT3G11340/AT3G25882/AT3G60670/AT4G01870/AT4G10500/AT4G12735/AT4G15610/AT4G32940/AT5G24110/AT5G24530/AT5G25930/AT5G37600/AT5G44610/AT5G52310/AT5G62165/AT5G64940
GO:0010150	leaf senescence	429	AT4G37740	AtGRF2,GRF2	NOVEL	28/2155	198/30167	0.000416542	0.00634911	28	AT1G02390/AT1G11190/AT1G20900/AT1G30700/AT1G31040/AT1G32450/AT1G54570/AT1G73220/AT1G76680/AT2G25460/AT2G31570/AT2G34610/AT2G35980/AT2G44300/AT2G44480/AT2G46950/AT3G05400/AT3G11340/AT3G60670/AT4G01870/AT4G02380/AT4G23810/AT5G25930/AT5G44610/AT5G52300/AT5G52310/AT5G56870/AT5G62165
GO:0010150	leaf senescence	430	AT3G09735	AT3G09735	NOVEL	37/2162	198/30167	6.9e-08	2.84e-06	37	AT1G01680/AT1G11190/AT1G20900/AT1G30700/AT1G31040/AT1G32450/AT1G54040/AT1G54570/AT1G69490/AT1G76680/AT2G13810/AT2G18690/AT2G22300/AT2G25460/AT2G35980/AT2G37750/AT2G39730/AT2G43000/AT2G46950/AT3G05400/AT3G25010/AT3G25882/AT3G60670/AT4G01870/AT4G02380/AT4G10500/AT4G12735/AT4G15610/AT4G32940/AT5G24110/AT5G24530/AT5G25930/AT5G37600/AT5G44610/AT5G52310/AT5G56870/AT5G62165
GO:0010150	leaf senescence	431	AT3G27940	LBD26	NOVEL	33/2159	198/30167	4.67e-06	0.000176773	33	AT1G01680/AT1G02390/AT1G21000/AT1G30700/AT1G32450/AT1G66830/AT1G66880/AT1G73220/AT1G73500/AT1G76680/AT2G13810/AT2G25460/AT2G30550/AT2G34610/AT2G39200/AT2G43000/AT2G44300/AT3G25010/AT3G25882/AT3G28100/AT3G50760/AT4G01870/AT4G02380/AT4G23810/AT4G32940/AT4G36040/AT5G03280/AT5G24110/AT5G24530/AT5G37600/AT5G52310/AT5G62165/AT5G63130
GO:0010150	leaf senescence	432	AT4G18450	AT4G18450	NOVEL	36/2145	198/30167	1.73e-07	8.98e-06	36	AT1G02390/AT1G11190/AT1G21000/AT1G30700/AT1G73220/AT1G73500/AT1G76680/AT1G76980/AT2G13810/AT2G25460/AT2G30550/AT2G34610/AT2G39200/AT2G43000/AT3G07350/AT3G10985/AT3G25882/AT3G26210/AT4G01250/AT4G01870/AT4G02380/AT4G10500/AT4G15610/AT4G18980/AT4G23810/AT4G30490/AT4G32940/AT4G36040/AT5G24110/AT5G24530/AT5G37600/AT5G39050/AT5G44610/AT5G52310/AT5G62165/AT5G63130
GO:0010150	leaf senescence	433	AT4G38340	NLP3	NOVEL	34/2158	198/30167	1.68e-06	6.68e-05	34	AT1G01680/AT1G02390/AT1G30700/AT1G32450/AT1G36622/AT1G69490/AT1G73500/AT1G76680/AT1G76980/AT2G13810/AT2G18690/AT2G22300/AT2G25460/AT2G31570/AT2G39730/AT2G44300/AT3G10985/AT3G14060/AT3G25882/AT3G50760/AT3G56400/AT4G02380/AT4G10500/AT4G15610/AT4G23810/AT4G32940/AT5G24110/AT5G24530/AT5G25930/AT5G44160/AT5G52310/AT5G59220/AT5G62000/AT5G63130
GO:0010150	leaf senescence	434	AT1G29160	COG1	NOVEL	35/2152	198/30167	5.53e-07	1.55e-05	35	AT1G01680/AT1G02390/AT1G11190/AT1G20900/AT1G30700/AT1G32450/AT1G54570/AT1G73220/AT1G76680/AT2G18690/AT2G25460/AT2G31570/AT2G34610/AT2G35980/AT2G37750/AT2G39200/AT2G44300/AT2G46950/AT3G05400/AT3G11340/AT3G25010/AT4G01870/AT4G02380/AT4G15610/AT4G23810/AT4G32940/AT4G36040/AT5G24110/AT5G24530/AT5G25930/AT5G44160/AT5G44610/AT5G52310/AT5G59220/AT5G62165
GO:0010150	leaf senescence	435	AT1G21910	DREB26	NOVEL	27/2130	198/30167	0.000773557	0.0106364	27	AT1G02390/AT1G20900/AT1G30700/AT1G32450/AT1G54570/AT1G73220/AT1G76680/AT2G18690/AT2G25460/AT2G31570/AT2G34610/AT2G37750/AT2G39200/AT2G44300/AT2G46950/AT3G05400/AT3G11340/AT3G14060/AT4G01870/AT4G02380/AT4G15610/AT4G23810/AT4G32940/AT5G24530/AT5G44610/AT5G52310/AT5G62165
GO:0010150	leaf senescence	436	AT2G22200	AT2G22200	NOVEL	25/2128	198/30167	0.00339041	0.0388355	25	AT1G02390/AT1G11190/AT1G32450/AT1G73220/AT1G73500/AT1G76680/AT2G13810/AT2G25460/AT2G39200/AT2G44300/AT2G44480/AT2G46950/AT3G05400/AT3G07350/AT3G10985/AT3G25882/AT4G01870/AT4G02380/AT4G10500/AT4G23810/AT4G36040/AT5G44160/AT5G52310/AT5G62165/AT5G63130
GO:0010150	leaf senescence	437	AT5G08190	NF-YB12	NOVEL	32/2139	198/30167	1.03e-05	0.000254637	32	AT1G02390/AT1G11190/AT1G30700/AT1G31040/AT1G32450/AT1G54570/AT1G69490/AT1G76680/AT2G13810/AT2G18690/AT2G22300/AT2G25460/AT2G35980/AT2G37750/AT2G39200/AT2G44300/AT2G46950/AT3G05400/AT3G11340/AT3G25882/AT4G01870/AT4G02380/AT4G10500/AT4G15610/AT4G32940/AT5G24530/AT5G25930/AT5G37600/AT5G44610/AT5G52310/AT5G62000/AT5G62165
GO:0010150	leaf senescence	438	AT5G03150	JKD	NOVEL	24/2117	198/30167	0.00631565	0.0490496	24	AT1G20900/AT1G30700/AT1G31040/AT1G32450/AT1G54570/AT1G73220/AT1G76680/AT2G34610/AT2G44480/AT2G46950/AT3G05400/AT3G11340/AT3G25882/AT3G60670/AT4G01870/AT4G02380/AT4G15610/AT4G32940/AT5G23950/AT5G44610/AT5G52300/AT5G52310/AT5G56870/AT5G59220
GO:0010150	leaf senescence	439	AT3G04930	AT3G04930	NOVEL	33/2131	198/30167	3.54e-06	9.08e-05	33	AT1G02390/AT1G11190/AT1G30700/AT1G31040/AT1G32450/AT1G54570/AT1G69490/AT1G76680/AT2G13810/AT2G18690/AT2G22300/AT2G25460/AT2G39200/AT2G44300/AT2G44480/AT2G46950/AT3G05400/AT3G11340/AT3G25882/AT4G01870/AT4G02380/AT4G10500/AT4G15610/AT4G23810/AT4G32940/AT5G03280/AT5G24530/AT5G25930/AT5G37600/AT5G44610/AT5G52310/AT5G62165/AT5G64940
GO:0010150	leaf senescence	440	AT3G10800	BZIP28	NOVEL	36/2120	198/30167	1.3e-07	3.89e-06	36	AT1G01680/AT1G02390/AT1G11190/AT1G30700/AT1G32450/AT1G54130/AT1G54570/AT1G64140/AT1G69490/AT1G76680/AT2G13810/AT2G18690/AT2G22300/AT2G25460/AT2G35980/AT2G44300/AT2G44480/AT2G46950/AT3G05400/AT3G11340/AT3G25882/AT4G01870/AT4G02380/AT4G10500/AT4G12735/AT4G15610/AT4G32940/AT5G24110/AT5G24530/AT5G25930/AT5G37600/AT5G44610/AT5G52310/AT5G62000/AT5G62165/AT5G63130
GO:0010150	leaf senescence	441	AT3G53340	NF-YB10	NOVEL	32/2116	198/30167	8.27e-06	0.000210506	32	AT1G01680/AT1G02390/AT1G11190/AT1G20900/AT1G31040/AT1G32450/AT1G54130/AT1G54570/AT1G69490/AT1G76680/AT2G13810/AT2G35980/AT2G39200/AT2G44300/AT2G44480/AT2G46950/AT3G05400/AT3G11340/AT3G25882/AT4G01870/AT4G02380/AT4G10500/AT4G12735/AT4G15610/AT4G32940/AT5G24530/AT5G25930/AT5G37600/AT5G44610/AT5G52310/AT5G62000/AT5G62165
GO:0010150	leaf senescence	442	AT2G29660	AT2G29660	NOVEL	27/2109	198/30167	0.000666481	0.0082131	27	AT1G02390/AT1G17020/AT1G20900/AT1G30700/AT1G31040/AT1G32450/AT1G54570/AT1G73220/AT1G76680/AT2G34610/AT2G35980/AT2G37750/AT2G46950/AT3G05400/AT3G11340/AT3G14060/AT3G50030/AT3G60670/AT4G01870/AT4G15610/AT4G32940/AT5G24530/AT5G25930/AT5G44160/AT5G44610/AT5G52300/AT5G52310
GO:0010150	leaf senescence	443	AT1G78080	AtWIND1,RAP2.4,WIND1	NOVEL	41/2125	198/30167	3.52e-10	1.41e-08	41	AT1G02390/AT1G08050/AT1G11190/AT1G30700/AT1G32450/AT1G54570/AT1G69490/AT1G73500/AT1G76680/AT2G18690/AT2G22300/AT2G25460/AT2G25625/AT2G31570/AT2G35980/AT2G37750/AT2G39200/AT2G44300/AT2G46950/AT3G11340/AT3G22910/AT3G25882/AT3G56400/AT4G01870/AT4G02380/AT4G03550/AT4G10500/AT4G14370/AT4G15610/AT4G23810/AT4G32940/AT4G36040/AT5G24530/AT5G25930/AT5G37600/AT5G44610/AT5G52310/AT5G56870/AT5G59220/AT5G62165…
GO:0010150	leaf senescence	444	AT3G54620	ATBZIP25,BZIP25,BZO2H4	NOVEL	34/2109	198/30167	1.01e-06	2.75e-05	34	AT1G01680/AT1G02390/AT1G11190/AT1G30700/AT1G32450/AT1G54130/AT1G54570/AT1G69490/AT1G76680/AT2G13810/AT2G18690/AT2G25460/AT2G34610/AT2G39200/AT2G44300/AT2G46950/AT3G05400/AT3G11340/AT3G25882/AT3G56400/AT4G01870/AT4G02380/AT4G10500/AT4G15610/AT4G23810/AT4G32940/AT5G24530/AT5G25930/AT5G37600/AT5G44610/AT5G52310/AT5G56870/AT5G62165/AT5G64940
GO:0010150	leaf senescence	445	AT4G18870	AT4G18870	NOVEL	29/2087	198/30167	0.000104763	0.00263545	29	AT1G01680/AT1G05620/AT1G66880/AT1G73220/AT1G76980/AT2G13810/AT2G30550/AT2G31570/AT2G34610/AT2G35980/AT2G44300/AT2G46950/AT3G05400/AT3G14067/AT3G25010/AT3G28100/AT4G01870/AT4G02380/AT4G10500/AT4G15610/AT4G32940/AT5G24110/AT5G24530/AT5G25930/AT5G37600/AT5G39050/AT5G44610/AT5G52310/AT5G56870
GO:0010150	leaf senescence	446	AT1G62990	IRX11,KNAT7	NOVEL	31/2093	198/30167	1.75e-05	0.000439183	31	AT1G02390/AT1G11190/AT1G20900/AT1G30700/AT1G32450/AT1G54570/AT1G73220/AT1G76680/AT1G76980/AT2G25460/AT2G31570/AT2G34610/AT2G35980/AT2G37750/AT2G46950/AT3G05400/AT3G11340/AT3G60670/AT4G01870/AT4G02380/AT4G10500/AT4G15610/AT5G25930/AT5G35110/AT5G44160/AT5G44610/AT5G52300/AT5G52310/AT5G56870/AT5G62165/AT5G63130
GO:0010150	leaf senescence	447	AT2G45410	LBD19	NOVEL	25/2070	198/30167	0.00236046	0.0344015	25	AT1G02390/AT1G05620/AT1G11190/AT1G32450/AT1G73220/AT1G73500/AT1G76680/AT2G25460/AT2G31570/AT2G34610/AT2G37750/AT3G05400/AT3G07350/AT3G25882/AT4G01250/AT4G02380/AT4G15610/AT4G23810/AT4G32940/AT4G36040/AT5G39050/AT5G44610/AT5G52310/AT5G62165/AT5G63130
GO:0010150	leaf senescence	448	AT5G46590	anac096,NAC096	NOVEL	27/2066	198/30167	0.000487032	0.00886319	27	AT1G02390/AT1G11190/AT1G21000/AT1G32450/AT1G54570/AT1G73500/AT1G76680/AT1G76980/AT2G25460/AT2G25625/AT2G35980/AT2G44300/AT3G05400/AT3G07350/AT3G11340/AT3G14060/AT3G25010/AT3G56400/AT4G01870/AT4G02380/AT4G15610/AT4G23810/AT4G32940/AT4G36040/AT5G25930/AT5G52310/AT5G62165
GO:0010150	leaf senescence	449	AT2G42400	ATVOZ2,VOZ2	NOVEL	29/2078	198/30167	9.72e-05	0.00168962	29	AT1G02390/AT1G11190/AT1G30700/AT1G32450/AT1G54570/AT1G69490/AT1G73220/AT1G76680/AT2G13810/AT2G22300/AT2G39200/AT2G44300/AT2G46950/AT3G05400/AT3G11340/AT3G25882/AT4G01870/AT4G02380/AT4G10500/AT4G15610/AT4G32940/AT4G36040/AT5G24530/AT5G25930/AT5G37600/AT5G44610/AT5G52310/AT5G62000/AT5G62165
GO:0010150	leaf senescence	450	AT1G08970	HAP5C,NF-YC9	NOVEL	30/2077	198/30167	3.89e-05	0.000742056	30	AT1G02390/AT1G20900/AT1G30700/AT1G31040/AT1G32450/AT1G54130/AT1G54570/AT1G73220/AT1G76680/AT2G13810/AT2G22300/AT2G35980/AT2G44300/AT2G44480/AT2G46950/AT3G05400/AT3G11340/AT3G25882/AT4G01870/AT4G10500/AT4G12735/AT4G32940/AT5G24530/AT5G25930/AT5G37600/AT5G44610/AT5G52310/AT5G62000/AT5G62165/AT5G64940
GO:0010150	leaf senescence	451	AT2G20280	AT2G20280	NOVEL	34/2073	198/30167	6.82e-07	2.25e-05	34	AT1G01680/AT1G02390/AT1G11190/AT1G30700/AT1G31040/AT1G32450/AT1G54130/AT1G54570/AT1G73220/AT1G76680/AT2G13810/AT2G22300/AT2G25460/AT2G37750/AT2G44300/AT2G44480/AT2G46950/AT3G05400/AT3G11340/AT3G25882/AT3G60670/AT4G01870/AT4G10500/AT4G15610/AT4G32940/AT5G24110/AT5G24530/AT5G25930/AT5G37600/AT5G44610/AT5G52300/AT5G52310/AT5G62000/AT5G62165
GO:0010150	leaf senescence	452	AT5G04760	DIV2	NOVEL	49/2075	198/30167	2.11e-15	1.22e-13	49	AT1G02390/AT1G08050/AT1G11190/AT1G21000/AT1G30700/AT1G32450/AT1G54130/AT1G54570/AT1G66880/AT1G69490/AT1G73500/AT1G76980/AT2G18690/AT2G22300/AT2G25460/AT2G25625/AT2G30550/AT2G31570/AT2G37750/AT2G39200/AT2G44300/AT2G44480/AT2G46950/AT3G07350/AT3G10500/AT3G11340/AT3G22910/AT3G25882/AT3G52430/AT3G56400/AT3G60670/AT4G01870/AT4G02380/AT4G10500/AT4G12735/AT4G14370/AT4G15610/AT4G23810/AT4G30490/AT4G32940…
GO:0010150	leaf senescence	453	AT1G53160	FTM6,SPL4	NOVEL	46/2062	198/30167	1.45e-13	1.11e-11	46	AT1G01230/AT1G01680/AT1G02390/AT1G09176/AT1G13990/AT1G21000/AT1G32450/AT1G36622/AT1G54040/AT1G66830/AT1G66880/AT1G69490/AT1G73500/AT1G76680/AT2G13810/AT2G18690/AT2G22300/AT2G25625/AT2G30550/AT2G39730/AT2G43000/AT2G46950/AT3G10985/AT3G14067/AT3G25010/AT3G25882/AT3G52430/AT3G56400/AT4G10500/AT4G12735/AT4G14365/AT4G14370/AT4G18980/AT4G23810/AT4G32940/AT5G24110/AT5G24530/AT5G25930/AT5G37600/AT5G39610…
GO:0010150	leaf senescence	454	AT4G20380	LSD1	NOVEL	37/2052	198/30167	1.8e-08	7.12e-07	37	AT1G02390/AT1G11190/AT1G30700/AT1G31040/AT1G32450/AT1G54130/AT1G54570/AT1G69490/AT1G76680/AT2G13810/AT2G18690/AT2G22300/AT2G25460/AT2G31570/AT2G35980/AT2G39200/AT2G44300/AT2G46950/AT3G05400/AT3G11340/AT3G25882/AT3G56400/AT4G01250/AT4G01870/AT4G02380/AT4G10500/AT4G15610/AT4G32940/AT4G36040/AT5G24530/AT5G25930/AT5G37600/AT5G44610/AT5G52310/AT5G59220/AT5G62165/AT5G64940
GO:0010150	leaf senescence	455	AT2G38090	AT2G38090	NOVEL	25/2048	198/30167	0.00204694	0.0193012	25	AT1G02390/AT1G11190/AT1G20900/AT1G30700/AT1G31040/AT1G32450/AT1G54570/AT1G73220/AT1G76680/AT2G31570/AT2G34610/AT2G37750/AT2G44300/AT2G46950/AT3G11340/AT3G60670/AT4G01870/AT4G02380/AT4G15610/AT4G32940/AT5G24530/AT5G25930/AT5G44160/AT5G44610/AT5G52310
GO:0010150	leaf senescence	456	AT5G44080	AT5G44080	NOVEL	30/2029	198/30167	2.52e-05	0.000553939	30	AT1G01680/AT1G02390/AT1G30700/AT1G31040/AT1G32450/AT1G54570/AT1G76680/AT2G13810/AT2G22300/AT2G31570/AT2G35980/AT2G39200/AT2G44300/AT2G44480/AT2G46950/AT3G05400/AT3G11340/AT3G25882/AT4G01870/AT4G02380/AT4G10500/AT4G15610/AT4G32940/AT5G24530/AT5G25930/AT5G37600/AT5G44610/AT5G52310/AT5G62000/AT5G62165
GO:0010150	leaf senescence	457	AT1G03040	AT1G03040	NOVEL	33/2035	198/30167	1.31e-06	3.84e-05	33	AT1G01680/AT1G02390/AT1G20900/AT1G30700/AT1G31040/AT1G32450/AT1G54570/AT1G73220/AT1G76680/AT2G13810/AT2G22300/AT2G25460/AT2G35980/AT2G44300/AT2G44480/AT2G46950/AT3G05400/AT3G11340/AT3G25010/AT3G25882/AT4G01870/AT4G02380/AT4G10500/AT4G15610/AT4G32940/AT5G24530/AT5G25930/AT5G37600/AT5G44610/AT5G52310/AT5G62000/AT5G62165/AT5G64940
GO:0010150	leaf senescence	458	AT4G36730	AtGBF1,GBF1	NOVEL	34/2041	198/30167	4.79e-07	1.5e-05	34	AT1G01680/AT1G02390/AT1G11190/AT1G30700/AT1G32450/AT1G54130/AT1G54570/AT1G69490/AT1G76680/AT2G13810/AT2G25460/AT2G37750/AT2G44300/AT2G44480/AT2G46950/AT3G05400/AT3G11340/AT3G25882/AT3G56400/AT4G01870/AT4G10500/AT4G15610/AT4G23810/AT4G32940/AT4G36040/AT5G24530/AT5G25930/AT5G37600/AT5G44610/AT5G52310/AT5G56870/AT5G62000/AT5G62165/AT5G64940
GO:0010150	leaf senescence	459	AT3G21330	AT3G21330	NOVEL	24/2016	198/30167	0.00346531	0.0449941	24	AT1G11190/AT1G32450/AT1G54570/AT1G66830/AT1G69490/AT1G73220/AT1G76680/AT2G13810/AT2G25460/AT2G34610/AT2G44300/AT2G46950/AT3G10985/AT3G11340/AT3G14060/AT3G60670/AT4G01870/AT4G02380/AT4G15610/AT4G18980/AT4G23810/AT5G52310/AT5G56870/AT5G62165
GO:0010150	leaf senescence	460	AT4G01720	AtWRKY47,WRKY47	NOVEL	47/2039	198/30167	2.22e-14	1.39e-12	47	AT1G01680/AT1G02390/AT1G20180/AT1G21000/AT1G30700/AT1G32450/AT1G36622/AT1G54570/AT1G73500/AT1G76680/AT2G13810/AT2G18690/AT2G25460/AT2G31570/AT2G34610/AT2G37750/AT2G39200/AT2G43000/AT2G44480/AT3G07350/AT3G10985/AT3G11340/AT3G14060/AT3G25010/AT3G25882/AT3G26210/AT3G29035/AT4G01250/AT4G01870/AT4G02380/AT4G10500/AT4G14370/AT4G15610/AT4G23810/AT4G32940/AT4G36040/AT5G24110/AT5G24530/AT5G25930/AT5G37600…
GO:0010150	leaf senescence	461	AT2G16720	ATMYB7,ATY49,MYB7	NOVEL	45/2040	198/30167	4.21e-13	2.43e-11	45	AT1G02390/AT1G11190/AT1G21000/AT1G30700/AT1G32450/AT1G54130/AT1G73500/AT1G76680/AT2G18690/AT2G22300/AT2G25460/AT2G25625/AT2G31570/AT2G34610/AT2G35980/AT2G37750/AT2G39200/AT2G39730/AT2G44300/AT2G44480/AT2G46950/AT3G05400/AT3G10500/AT3G11340/AT3G14060/AT3G22910/AT3G25882/AT3G56400/AT3G60670/AT4G01870/AT4G02380/AT4G10500/AT4G14365/AT4G15610/AT4G23810/AT4G32940/AT5G03280/AT5G24530/AT5G25930/AT5G37600…
GO:0010150	leaf senescence	462	AT2G04880	ATWRKY1,WRKY1,ZAP1	NOVEL	32/2037	198/30167	3.78e-06	7.9e-05	32	AT1G01680/AT1G02390/AT1G11190/AT1G30700/AT1G32450/AT1G54570/AT1G76680/AT2G13810/AT2G22300/AT2G25460/AT2G31570/AT2G39200/AT2G44300/AT2G46950/AT3G05400/AT3G11340/AT3G25882/AT3G56400/AT4G01870/AT4G10500/AT4G15610/AT4G23810/AT4G32940/AT5G24530/AT5G25930/AT5G37600/AT5G39050/AT5G44610/AT5G52310/AT5G62000/AT5G62165/AT5G64940
GO:0010150	leaf senescence	463	AT3G23690	CIL2	NOVEL	29/2039	198/30167	6.98e-05	0.0012426	29	AT1G01680/AT1G02390/AT1G30700/AT1G32450/AT1G54130/AT1G54570/AT1G69490/AT1G73220/AT1G76680/AT2G13810/AT2G22300/AT2G35980/AT2G39200/AT2G44300/AT2G46950/AT3G05400/AT3G11340/AT3G25010/AT3G25882/AT4G10500/AT4G15610/AT4G32940/AT5G24530/AT5G25930/AT5G44610/AT5G52310/AT5G62000/AT5G62165/AT5G64940
GO:0010150	leaf senescence	464	AT5G67580	ATTBP3,ATTRB2,TBP3,TRB2	NOVEL	31/2015	198/30167	8.32e-06	0.000164367	31	AT1G02390/AT1G11190/AT1G20900/AT1G30700/AT1G32450/AT1G54130/AT1G54570/AT1G73220/AT1G76680/AT2G13810/AT2G22300/AT2G25460/AT2G35980/AT2G39200/AT2G44300/AT2G44480/AT2G46950/AT3G05400/AT3G11340/AT3G25882/AT4G01870/AT4G10500/AT4G15610/AT4G32940/AT5G24530/AT5G25930/AT5G37600/AT5G44610/AT5G52310/AT5G62000/AT5G62165
GO:0010150	leaf senescence	465	AT1G49475	AT1G49475	NOVEL	29/2017	198/30167	5.76e-05	0.00111156	29	AT1G02390/AT1G11190/AT1G32450/AT1G69490/AT1G73220/AT1G73500/AT1G76680/AT2G25460/AT2G30550/AT2G34610/AT2G39730/AT2G44300/AT2G46950/AT3G22910/AT3G56400/AT4G01870/AT4G02380/AT4G15610/AT4G18980/AT4G23810/AT4G32940/AT4G36040/AT5G03280/AT5G24110/AT5G25930/AT5G52310/AT5G59220/AT5G62165/AT5G63130
GO:0010150	leaf senescence	466	AT2G45120	AT2G45120	NOVEL	32/2001	198/30167	2.61e-06	6.92e-05	32	AT1G02390/AT1G11190/AT1G30700/AT1G31040/AT1G32450/AT1G54570/AT1G73220/AT1G73500/AT1G76680/AT2G18690/AT2G25460/AT2G31570/AT2G34610/AT2G35980/AT2G37750/AT2G44300/AT2G46950/AT3G05400/AT3G11340/AT3G22910/AT3G56400/AT3G60670/AT4G01870/AT4G02380/AT4G15610/AT5G25930/AT5G35110/AT5G37600/AT5G44610/AT5G52310/AT5G62165/AT5G63130
GO:0010150	leaf senescence	467	AT4G16430	bHLH003,bHLH03,bHLH3,JAM3	NOVEL	30/2008	198/30167	2.07e-05	0.000425896	30	AT1G01680/AT1G02390/AT1G11190/AT1G30700/AT1G32450/AT1G54130/AT1G54570/AT1G69490/AT1G76680/AT2G13810/AT2G22300/AT2G35980/AT2G39200/AT2G44300/AT2G46950/AT3G05400/AT3G11340/AT3G25010/AT3G25882/AT4G01870/AT4G02380/AT4G10500/AT4G15610/AT4G32940/AT5G24530/AT5G25930/AT5G37600/AT5G44610/AT5G52310/AT5G62165
GO:0010150	leaf senescence	468	AT5G65210	TGA1	NOVEL	35/2023	198/30167	1.28e-07	3.41e-06	35	AT1G02390/AT1G08050/AT1G11190/AT1G20900/AT1G30700/AT1G32450/AT1G54570/AT1G69490/AT1G73500/AT1G76680/AT1G76980/AT2G25460/AT2G25625/AT2G31570/AT2G34610/AT2G37750/AT2G39200/AT2G44300/AT2G46950/AT3G07350/AT3G11340/AT3G14060/AT3G60670/AT4G01870/AT4G02380/AT4G15610/AT4G32940/AT5G24110/AT5G24530/AT5G44160/AT5G44610/AT5G52310/AT5G56870/AT5G59220/AT5G63130
GO:0010150	leaf senescence	469	AT2G03500	EFM,HHO4	NOVEL	32/2006	198/30167	2.75e-06	8.62e-05	32	AT1G11190/AT1G21000/AT1G30700/AT1G32450/AT1G73500/AT1G76680/AT2G13810/AT2G18690/AT2G25460/AT2G35980/AT2G37750/AT2G39200/AT2G44300/AT2G44480/AT2G46950/AT3G05400/AT3G07350/AT3G10500/AT3G10985/AT3G11340/AT3G14060/AT4G01870/AT4G02380/AT4G15610/AT4G36040/AT5G25930/AT5G44160/AT5G44610/AT5G52300/AT5G56870/AT5G62165/AT5G63130
GO:0010150	leaf senescence	470	AT3G22170	CPD45,FHY3	NOVEL	32/2002	198/30167	2.64e-06	7.11e-05	32	AT1G01680/AT1G02390/AT1G11190/AT1G30700/AT1G32450/AT1G54570/AT1G69490/AT1G73220/AT1G76680/AT2G13810/AT2G25460/AT2G31570/AT2G35980/AT2G39200/AT2G44300/AT2G46950/AT3G05400/AT3G11340/AT3G25010/AT3G25882/AT4G01870/AT4G02380/AT4G10500/AT4G15610/AT4G32940/AT5G24110/AT5G24530/AT5G25930/AT5G37600/AT5G44610/AT5G52310/AT5G62165
GO:0010150	leaf senescence	471	AT5G22890	STOP2	NOVEL	24/2006	198/30167	0.00325485	0.03736	24	AT1G02390/AT1G30700/AT1G32450/AT1G73220/AT1G76680/AT2G25460/AT2G31570/AT2G34610/AT2G37750/AT2G46950/AT3G05400/AT4G01870/AT4G02380/AT4G15610/AT4G23810/AT4G36040/AT5G24110/AT5G24530/AT5G37600/AT5G39050/AT5G44160/AT5G44610/AT5G52310/AT5G56870
GO:0010150	leaf senescence	472	AT2G03060	AT2G03060	NOVEL	34/2009	198/30167	3.33e-07	9.4e-06	34	AT1G02390/AT1G11190/AT1G20900/AT1G21000/AT1G30700/AT1G32450/AT1G73500/AT1G76680/AT2G18690/AT2G25460/AT2G31570/AT2G34610/AT2G37750/AT2G39200/AT2G44300/AT2G44480/AT2G46950/AT3G11340/AT3G14060/AT3G29035/AT3G56400/AT4G01870/AT4G02380/AT4G15610/AT4G23810/AT4G32940/AT4G36040/AT5G25930/AT5G37600/AT5G44610/AT5G52310/AT5G56870/AT5G62000/AT5G62165
GO:0010150	leaf senescence	473	AT3G11100	ENAP1,VFP3	NOVEL	33/2002	198/30167	9.16e-07	2.55e-05	33	AT1G02390/AT1G30700/AT1G31040/AT1G32450/AT1G54130/AT1G54570/AT1G69490/AT1G76680/AT2G13810/AT2G22300/AT2G25460/AT2G39200/AT2G44300/AT2G44480/AT2G46950/AT3G05400/AT3G11340/AT3G25882/AT4G01870/AT4G02380/AT4G10500/AT4G15610/AT4G23810/AT4G32940/AT4G36040/AT5G24530/AT5G25930/AT5G37600/AT5G44610/AT5G52310/AT5G62000/AT5G62165/AT5G64940
GO:0010150	leaf senescence	474	AT1G54830	NF-YC3	NOVEL	31/2008	198/30167	7.76e-06	0.000174691	31	AT1G01680/AT1G02390/AT1G11190/AT1G30700/AT1G31040/AT1G32450/AT1G54570/AT1G69490/AT1G76680/AT2G18690/AT2G25460/AT2G31570/AT2G35980/AT2G37750/AT2G39200/AT2G44300/AT2G46950/AT3G05400/AT3G11340/AT3G25882/AT4G01870/AT4G02380/AT4G10500/AT4G15610/AT4G32940/AT5G24530/AT5G25930/AT5G37600/AT5G44610/AT5G52310/AT5G62165
GO:0010150	leaf senescence	475	AT2G44745	AtWRKY12,WRKY12	NOVEL	27/1986	198/30167	0.000263083	0.00694199	27	AT1G02390/AT1G05620/AT1G11190/AT1G31040/AT1G32450/AT1G69490/AT1G73220/AT2G18690/AT2G25460/AT2G34610/AT2G35980/AT2G44300/AT2G46950/AT3G05400/AT3G25010/AT3G25882/AT4G01870/AT4G02380/AT4G18980/AT4G23810/AT4G32940/AT5G24110/AT5G25930/AT5G52310/AT5G56870/AT5G62165/AT5G64940
GO:0010150	leaf senescence	476	AT5G42520	ATBPC6,BBR/BPC6,BPC6	NOVEL	27/1994	198/30167	0.000280344	0.00336006	27	AT1G02390/AT1G11190/AT1G30700/AT1G32450/AT1G54570/AT1G76680/AT2G13810/AT2G22300/AT2G25460/AT2G35980/AT2G39200/AT2G44300/AT2G46950/AT3G05400/AT3G25882/AT4G01870/AT4G02380/AT4G10500/AT4G32940/AT4G36040/AT5G24530/AT5G25930/AT5G37600/AT5G44610/AT5G52310/AT5G62000/AT5G62165
GO:0010150	leaf senescence	477	AT1G53910	ERF74,RAP2.12	NOVEL	37/2004	198/30167	9.71e-09	3.56e-07	37	AT1G02390/AT1G08050/AT1G11190/AT1G30700/AT1G31040/AT1G32450/AT1G54570/AT1G69490/AT1G73500/AT1G76680/AT2G18690/AT2G25460/AT2G31570/AT2G37750/AT2G39730/AT2G46950/AT3G05400/AT3G11340/AT3G25882/AT3G48020/AT3G56400/AT4G01870/AT4G02380/AT4G10500/AT4G15610/AT4G23810/AT4G30490/AT4G32940/AT5G24110/AT5G24530/AT5G25930/AT5G44610/AT5G52310/AT5G59220/AT5G62165/AT5G63130/AT5G64940
GO:0010150	leaf senescence	478	AT3G56850	AREB3,DPBF3	NOVEL	33/1993	198/30167	8.29e-07	2.58e-05	33	AT1G01680/AT1G02390/AT1G30700/AT1G31040/AT1G32450/AT1G54130/AT1G54570/AT1G69490/AT1G73220/AT1G76680/AT2G13810/AT2G22300/AT2G25460/AT2G31570/AT2G35980/AT2G44300/AT2G46950/AT3G05400/AT3G11340/AT3G25882/AT4G01870/AT4G02380/AT4G10500/AT4G15610/AT4G32940/AT5G24530/AT5G25930/AT5G37600/AT5G44610/AT5G52310/AT5G62000/AT5G62165/AT5G64940
GO:0010150	leaf senescence	479	AT1G01060	LHY,LHY1	NOVEL	30/1973	198/30167	1.48e-05	0.000363481	30	AT1G02390/AT1G21000/AT1G30700/AT1G32450/AT1G69490/AT1G73220/AT1G73500/AT1G76680/AT2G13810/AT2G25460/AT2G25625/AT2G34610/AT2G39730/AT2G44300/AT2G44480/AT2G46950/AT3G05400/AT3G11340/AT3G52430/AT4G01870/AT4G02380/AT4G10500/AT4G15610/AT5G24530/AT5G25930/AT5G52300/AT5G52310/AT5G56870/AT5G62165/AT5G64940
GO:0010150	leaf senescence	480	AT3G28857	PRE5	NOVEL	32/1975	198/30167	1.98e-06	7.55e-05	32	AT1G01680/AT1G02390/AT1G11190/AT1G18210/AT1G30700/AT1G32450/AT1G66830/AT1G73220/AT1G73500/AT1G76680/AT2G25460/AT2G30550/AT2G31570/AT2G39200/AT3G10985/AT3G25882/AT4G01250/AT4G01870/AT4G02380/AT4G10500/AT4G15610/AT4G23810/AT4G32940/AT4G36040/AT5G24530/AT5G25930/AT5G37600/AT5G44160/AT5G44610/AT5G56870/AT5G62165/AT5G63130
GO:0010150	leaf senescence	481	AT4G11660	AT-HSFB2B,HSF7,HSFB2B	NOVEL	35/1982	198/30167	7.81e-08	2.37e-06	35	AT1G02390/AT1G20900/AT1G21000/AT1G30700/AT1G31040/AT1G32450/AT1G54570/AT1G73220/AT1G73500/AT1G76680/AT1G76980/AT2G13810/AT2G25460/AT2G31570/AT2G34610/AT2G37750/AT2G44300/AT2G46950/AT3G07350/AT3G11340/AT3G14060/AT4G01870/AT4G02380/AT4G10500/AT4G15610/AT4G23810/AT4G32940/AT5G25930/AT5G37600/AT5G44160/AT5G44610/AT5G52310/AT5G56870/AT5G59220/AT5G63130
GO:0010150	leaf senescence	482	AT2G24570	ATWRKY17,WRKY17	NOVEL	32/1982	198/30167	2.13e-06	4.56e-05	32	AT1G01680/AT1G02390/AT1G11190/AT1G30700/AT1G32450/AT1G69490/AT1G76980/AT2G18690/AT2G25460/AT2G31570/AT2G34610/AT2G37750/AT2G44300/AT2G46950/AT3G07350/AT3G11340/AT3G14060/AT3G22910/AT3G25882/AT4G01870/AT4G02380/AT4G10500/AT4G15610/AT4G23810/AT4G32940/AT5G24530/AT5G25930/AT5G44160/AT5G44610/AT5G52310/AT5G62165/AT5G63130
GO:0010150	leaf senescence	483	AT2G24650	AT2G24650	NOVEL	33/1975	198/30167	6.78e-07	2.43e-05	33	AT1G02390/AT1G21000/AT1G30700/AT1G31040/AT1G32450/AT1G36622/AT1G69490/AT1G73500/AT1G76680/AT2G13810/AT2G35980/AT2G39200/AT2G44300/AT2G44480/AT2G46950/AT3G10985/AT3G11340/AT3G22910/AT3G56400/AT3G60670/AT4G01870/AT4G02380/AT4G15610/AT4G23810/AT5G03280/AT5G24110/AT5G25930/AT5G37600/AT5G39050/AT5G44610/AT5G52310/AT5G59220/AT5G62165
GO:0010150	leaf senescence	484	AT4G23750	CRF2,TMO3	NOVEL	27/1960	198/30167	0.000213326	0.00335283	27	AT1G02390/AT1G20900/AT1G30700/AT1G31040/AT1G32450/AT1G69490/AT1G73500/AT1G76680/AT2G25460/AT2G34610/AT2G37750/AT2G44300/AT2G46950/AT3G05400/AT3G11340/AT3G60670/AT4G01870/AT4G02380/AT4G10500/AT4G15610/AT4G32940/AT5G24530/AT5G25930/AT5G44160/AT5G52300/AT5G52310/AT5G59220
GO:0010150	leaf senescence	485	AT3G04670	ATWRKY39,WRKY39	NOVEL	33/1964	198/30167	5.99e-07	1.5e-05	33	AT1G02390/AT1G11190/AT1G20900/AT1G30700/AT1G31040/AT1G32450/AT1G54570/AT1G69490/AT1G73500/AT1G76680/AT2G25460/AT2G31570/AT2G34610/AT2G37750/AT2G39200/AT2G44300/AT2G46950/AT3G10500/AT3G11340/AT3G14060/AT3G25882/AT4G01870/AT4G02380/AT4G15610/AT4G23810/AT4G32940/AT5G24530/AT5G44160/AT5G44610/AT5G52300/AT5G52310/AT5G59220/AT5G63130
GO:0010150	leaf senescence	486	AT1G16640	AT1G16640	NOVEL	29/1940	198/30167	2.86e-05	0.000827495	29	AT1G01680/AT1G02390/AT1G30700/AT1G32450/AT1G34420/AT1G76680/AT2G13790/AT2G22300/AT2G25460/AT2G34610/AT2G35980/AT2G39200/AT2G44300/AT2G44480/AT2G46950/AT3G05400/AT3G11340/AT3G22910/AT3G25882/AT4G01870/AT4G02380/AT4G10500/AT4G23810/AT5G03280/AT5G25930/AT5G44610/AT5G52310/AT5G62165/AT5G63130
GO:0010150	leaf senescence	487	AT2G44910	ATHB-4,ATHB4,HB4	NOVEL	26/1926	198/30167	0.000383991	0.00767023	26	AT1G02390/AT1G30700/AT1G32450/AT1G36622/AT1G73220/AT1G73500/AT1G76680/AT2G25460/AT2G31570/AT2G34610/AT2G39200/AT2G42540/AT2G43000/AT2G44480/AT2G46950/AT3G05400/AT4G01250/AT4G01870/AT4G02380/AT4G10500/AT4G15610/AT4G23810/AT4G36040/AT5G37600/AT5G52310/AT5G62165
GO:0010150	leaf senescence	488	AT5G48670	AT5G48670	NOVEL	34/1948	198/30167	1.63e-07	7.56e-06	34	AT1G02390/AT1G11190/AT1G30700/AT1G32450/AT1G66830/AT1G73220/AT1G73500/AT1G76680/AT2G22300/AT2G25460/AT2G35980/AT2G39200/AT2G42540/AT2G43000/AT2G44300/AT2G44480/AT2G46950/AT3G11340/AT3G22910/AT3G26210/AT4G01870/AT4G02380/AT4G10500/AT4G15610/AT4G23810/AT4G32940/AT4G36040/AT5G24530/AT5G25930/AT5G37600/AT5G52310/AT5G59220/AT5G62165/AT5G63130
GO:0010150	leaf senescence	489	AT2G40620	bZIP18	NOVEL	25/1941	198/30167	0.000980288	0.00936463	25	AT1G02390/AT1G11190/AT1G20900/AT1G30700/AT1G31040/AT1G32450/AT1G69490/AT1G76680/AT2G25460/AT2G34610/AT2G37750/AT2G39200/AT2G44300/AT2G46950/AT3G11340/AT3G60670/AT4G01870/AT4G02380/AT4G10500/AT4G15610/AT4G32940/AT5G44160/AT5G44610/AT5G52310/AT5G62165
GO:0010150	leaf senescence	490	AT3G10760	AT3G10760	NOVEL	28/1941	198/30167	7.41e-05	0.000982301	28	AT1G01680/AT1G02390/AT1G11190/AT1G30700/AT1G32450/AT1G54130/AT1G54570/AT1G76680/AT2G13810/AT2G22300/AT2G31570/AT2G39730/AT2G44300/AT2G46950/AT3G11340/AT3G25882/AT3G60670/AT4G01870/AT4G10500/AT4G23810/AT4G32940/AT5G24530/AT5G25930/AT5G37600/AT5G44610/AT5G52310/AT5G62165/AT5G64940
GO:0010150	leaf senescence	491	AT4G36780	BEH2	NOVEL	37/1949	198/30167	4.65e-09	1.69e-07	37	AT1G01680/AT1G02390/AT1G08050/AT1G11190/AT1G30700/AT1G31040/AT1G32450/AT1G54130/AT1G54570/AT1G64140/AT1G69490/AT1G76680/AT2G18690/AT2G25460/AT2G31570/AT2G35980/AT2G37750/AT2G39200/AT2G44300/AT2G46950/AT3G05400/AT3G11340/AT3G25882/AT4G01870/AT4G02380/AT4G10500/AT4G15610/AT4G30490/AT4G32940/AT5G24110/AT5G24530/AT5G25930/AT5G44610/AT5G52310/AT5G62165/AT5G63130/AT5G64940
GO:0010150	leaf senescence	492	AT1G06850	AtbZIP52,bZIP52	NOVEL	31/1941	198/30167	3.93e-06	7.64e-05	31	AT1G01680/AT1G02390/AT1G11190/AT1G30700/AT1G32450/AT1G54570/AT1G69490/AT1G76680/AT2G25460/AT2G31570/AT2G37750/AT2G39200/AT2G44300/AT2G46950/AT3G10500/AT3G11340/AT3G14060/AT3G60670/AT4G01870/AT4G02380/AT4G15610/AT4G23810/AT4G32940/AT4G36040/AT5G25930/AT5G39050/AT5G44160/AT5G44610/AT5G52310/AT5G62165/AT5G63130
GO:0010150	leaf senescence	493	AT4G17500	AtERF#100,ATERF-1,ERF-1,ERF1A	NOVEL	36/1931	198/30167	1.25e-08	3.87e-07	36	AT1G02390/AT1G08050/AT1G11190/AT1G30700/AT1G32450/AT1G69490/AT1G73500/AT1G76680/AT2G13810/AT2G18690/AT2G22300/AT2G25460/AT2G25625/AT2G31570/AT2G37750/AT2G44300/AT2G46950/AT3G11340/AT3G14060/AT3G22910/AT3G25882/AT3G56400/AT4G01870/AT4G02380/AT4G10500/AT4G12735/AT4G15610/AT4G23810/AT4G32940/AT5G24530/AT5G25930/AT5G52310/AT5G56870/AT5G59220/AT5G62165/AT5G63130
GO:0010150	leaf senescence	494	AT2G28500	LBD11	NOVEL	25/1922	198/30167	0.000853415	0.0103174	25	AT1G02390/AT1G11190/AT1G21000/AT1G32450/AT1G73500/AT1G76680/AT2G13810/AT2G35980/AT2G44300/AT2G44480/AT3G05400/AT3G07350/AT3G10985/AT3G22910/AT3G25882/AT3G50760/AT3G56400/AT3G60670/AT4G01870/AT4G02380/AT4G10500/AT4G23810/AT4G36040/AT5G62165/AT5G63130
GO:0010150	leaf senescence	495	AT2G25650	GPL1	NOVEL	31/1939	198/30167	3.85e-06	6.46e-05	31	AT1G02390/AT1G21000/AT1G30700/AT1G32450/AT1G54570/AT1G73500/AT1G76680/AT2G25460/AT2G31570/AT2G35980/AT2G37750/AT2G39200/AT2G44300/AT2G46950/AT3G11340/AT3G56400/AT4G01870/AT4G02380/AT4G10500/AT4G15610/AT4G23810/AT4G32940/AT4G36040/AT5G24530/AT5G25930/AT5G37600/AT5G44610/AT5G52310/AT5G59220/AT5G62165/AT5G63130
GO:0010150	leaf senescence	496	AT1G10120	CIB4	NOVEL	30/1935	198/30167	1.02e-05	0.000154763	30	AT1G02390/AT1G11190/AT1G30700/AT1G31040/AT1G32450/AT1G54570/AT1G73500/AT1G76680/AT2G25460/AT2G31570/AT2G34610/AT2G35980/AT2G37750/AT2G39200/AT2G44300/AT2G44480/AT2G46950/AT3G11340/AT4G01870/AT4G02380/AT4G10500/AT4G15610/AT4G23810/AT4G32940/AT5G24530/AT5G25930/AT5G39050/AT5G44160/AT5G44610/AT5G52310
GO:0010150	leaf senescence	497	AT4G02640	ATBZIP10,BZO2H1	NOVEL	27/1920	198/30167	0.000153045	0.00214918	27	AT1G01680/AT1G02390/AT1G30700/AT1G32450/AT1G54130/AT1G54570/AT1G76680/AT2G13810/AT2G22300/AT2G44300/AT2G46950/AT3G05400/AT3G11340/AT3G25882/AT4G01870/AT4G02380/AT4G10500/AT4G15610/AT4G32940/AT5G24530/AT5G25930/AT5G37600/AT5G44610/AT5G52310/AT5G62000/AT5G62165/AT5G64940
GO:0010150	leaf senescence	498	AT3G11450	AtGlsA1,ZRF1a	NOVEL	30/1912	198/30167	8.12e-06	0.000215066	30	AT1G01680/AT1G02390/AT1G30700/AT1G31040/AT1G32450/AT1G36622/AT1G54570/AT1G69490/AT1G73220/AT1G76680/AT2G13810/AT2G22300/AT2G25460/AT2G46950/AT3G05400/AT3G11340/AT3G25882/AT3G60670/AT4G01870/AT4G10500/AT4G12735/AT4G15610/AT4G32940/AT5G24530/AT5G25930/AT5G37600/AT5G44610/AT5G52310/AT5G62165/AT5G64940
GO:0010150	leaf senescence	499	AT1G17520	AT1G17520	NOVEL	35/1917	198/30167	3.45e-08	1.23e-06	35	AT1G01680/AT1G02390/AT1G11190/AT1G30700/AT1G31040/AT1G32450/AT1G54130/AT1G54570/AT1G69490/AT1G76680/AT2G13810/AT2G22300/AT2G25460/AT2G31570/AT2G39200/AT2G44300/AT2G46950/AT3G05400/AT3G11340/AT3G25010/AT3G25882/AT4G01870/AT4G02380/AT4G10500/AT4G15610/AT4G32940/AT4G36040/AT5G24110/AT5G24530/AT5G25930/AT5G37600/AT5G44610/AT5G52310/AT5G62000/AT5G62165
GO:0010150	leaf senescence	500	AT5G49300	AT5G49300	NOVEL	26/1905	198/30167	0.000324996	0.00428889	26	AT1G02390/AT1G08050/AT1G20900/AT1G30700/AT1G32450/AT1G54570/AT1G73220/AT1G76680/AT2G13810/AT2G25460/AT2G34610/AT2G39730/AT2G44300/AT2G46950/AT3G05400/AT3G11340/AT3G25010/AT4G01870/AT4G02380/AT4G15610/AT4G32940/AT5G44160/AT5G52300/AT5G52310/AT5G59220/AT5G64940
GO:0010150	leaf senescence	501	AT1G58100	AtTCP8,TCP8	NOVEL	28/1902	198/30167	5.22e-05	0.000799752	28	AT1G01680/AT1G02390/AT1G11190/AT1G30700/AT1G31040/AT1G32450/AT1G54570/AT1G69490/AT1G76680/AT2G13810/AT2G25460/AT2G44300/AT2G46950/AT3G05400/AT3G11340/AT3G25882/AT4G01870/AT4G02380/AT4G10500/AT4G15610/AT4G32940/AT5G24530/AT5G25930/AT5G37600/AT5G44610/AT5G52310/AT5G62165/AT5G64940
GO:0010150	leaf senescence	502	AT5G28040	VFP4	NOVEL	30/1905	198/30167	7.56e-06	0.000154637	30	AT1G01680/AT1G02390/AT1G11190/AT1G30700/AT1G32450/AT1G54130/AT1G54570/AT1G76680/AT2G13810/AT2G22300/AT2G25460/AT2G35980/AT2G44300/AT2G46950/AT3G05400/AT3G11340/AT3G25882/AT4G01870/AT4G02380/AT4G10500/AT4G15610/AT4G32940/AT4G36040/AT5G24530/AT5G25930/AT5G37600/AT5G44610/AT5G52310/AT5G62000/AT5G62165
GO:0010150	leaf senescence	503	AT2G25180	ARR12,AtARR12,RR12	NOVEL	31/1909	198/30167	2.8e-06	5.92e-05	31	AT1G01680/AT1G02390/AT1G11190/AT1G20900/AT1G30700/AT1G32450/AT1G54130/AT1G54570/AT1G69490/AT1G76680/AT2G25460/AT2G37750/AT2G44300/AT2G46950/AT3G11340/AT3G25882/AT4G01870/AT4G02380/AT4G10500/AT4G15610/AT4G23810/AT4G30490/AT4G32940/AT4G36040/AT5G24110/AT5G24530/AT5G25930/AT5G37600/AT5G44610/AT5G52310/AT5G62165
GO:0010150	leaf senescence	504	AT2G21240	ATBPC4,BBR,BPC4	NOVEL	34/1910	198/30167	1.02e-07	3.43e-06	34	AT1G02390/AT1G11190/AT1G30700/AT1G32450/AT1G54570/AT1G69490/AT1G76680/AT2G13810/AT2G25460/AT2G37750/AT2G44300/AT2G44480/AT2G46950/AT3G05400/AT3G11340/AT3G25882/AT3G56400/AT4G01870/AT4G02380/AT4G10500/AT4G12735/AT4G15610/AT4G23810/AT4G32940/AT4G36040/AT5G24530/AT5G25930/AT5G37600/AT5G44610/AT5G52310/AT5G56870/AT5G62000/AT5G62165/AT5G64940
GO:0010150	leaf senescence	505	AT4G06746	DEAR5,RAP2.9	NOVEL	43/1905	198/30167	7.32e-13	5.47e-11	43	AT1G11190/AT1G18210/AT1G21000/AT1G30700/AT1G32450/AT1G54130/AT1G73220/AT1G73500/AT1G76680/AT1G76980/AT2G13810/AT2G18690/AT2G22300/AT2G25460/AT2G34610/AT2G43000/AT2G44300/AT2G44480/AT2G46950/AT3G07350/AT3G10985/AT3G22910/AT3G25010/AT3G25882/AT3G29035/AT4G01870/AT4G02380/AT4G12735/AT4G14365/AT4G15610/AT4G23810/AT4G32940/AT4G36040/AT5G24110/AT5G24530/AT5G37600/AT5G39050/AT5G39610/AT5G52310/AT5G56870…
GO:0010150	leaf senescence	506	AT3G60030	SPL12	NOVEL	26/1894	198/30167	0.000297423	0.00442725	26	AT1G01680/AT1G02390/AT1G30700/AT1G32450/AT1G54570/AT1G69490/AT1G73220/AT1G76680/AT2G13810/AT2G22300/AT2G35980/AT2G44300/AT2G46950/AT3G05400/AT3G11340/AT3G25882/AT4G10500/AT4G15610/AT4G32940/AT5G24530/AT5G25930/AT5G37600/AT5G44610/AT5G52310/AT5G62000/AT5G62165
GO:0010150	leaf senescence	507	AT4G32890	GATA9	NOVEL	31/1888	198/30167	2.23e-06	5.16e-05	31	AT1G02390/AT1G11190/AT1G20900/AT1G30700/AT1G31040/AT1G32450/AT1G54570/AT1G73500/AT1G76680/AT2G25460/AT2G31570/AT2G34610/AT2G37750/AT2G39200/AT2G44300/AT2G46950/AT3G11340/AT3G60670/AT4G01870/AT4G02380/AT4G03550/AT4G10500/AT4G15610/AT4G32940/AT4G36040/AT5G03280/AT5G24530/AT5G25930/AT5G44610/AT5G52310/AT5G62165
GO:0010150	leaf senescence	508	AT1G06040	BBX24,STO	NOVEL	35/1905	198/30167	2.96e-08	1.26e-06	35	AT1G02390/AT1G11190/AT1G21000/AT1G30700/AT1G32450/AT1G54130/AT1G54570/AT1G69490/AT1G73500/AT1G76680/AT2G13810/AT2G18690/AT2G22300/AT2G25460/AT2G35980/AT2G44480/AT2G46950/AT3G05400/AT3G11340/AT3G25882/AT3G56400/AT4G01870/AT4G10500/AT4G12735/AT4G14370/AT4G15610/AT4G23810/AT4G32940/AT5G24530/AT5G25930/AT5G37600/AT5G44610/AT5G52310/AT5G62165/AT5G64940
GO:0010150	leaf senescence	509	AT3G49850	ATTRB3,TBP2,TRB3	NOVEL	27/1890	198/30167	0.000118369	0.00172819	27	AT1G02390/AT1G11190/AT1G30700/AT1G32450/AT1G54130/AT1G54570/AT1G76680/AT2G13810/AT2G31570/AT2G44300/AT2G46950/AT3G05400/AT3G11340/AT3G25882/AT4G01870/AT4G02380/AT4G10500/AT4G15610/AT4G32940/AT5G24110/AT5G24530/AT5G25930/AT5G37600/AT5G44610/AT5G52310/AT5G62000/AT5G62165
GO:0010150	leaf senescence	510	AT5G67450	AZF1,ZF1	NOVEL	35/1871	198/30167	1.89e-08	9.19e-07	35	AT1G01680/AT1G02390/AT1G30700/AT1G32450/AT1G34420/AT1G73220/AT1G76680/AT1G76980/AT2G13810/AT2G18690/AT2G22300/AT2G25460/AT2G31570/AT2G35980/AT2G43000/AT2G44300/AT2G44480/AT3G05400/AT3G22910/AT3G25010/AT3G25882/AT4G01870/AT4G02380/AT4G10500/AT4G12735/AT4G14370/AT4G15610/AT4G23810/AT5G24110/AT5G24530/AT5G25930/AT5G37600/AT5G52310/AT5G62165/AT5G63130
GO:0010150	leaf senescence	511	AT1G05710	AT1G05710	NOVEL	30/1867	198/30167	5.1e-06	0.00015403	30	AT1G02390/AT1G17020/AT1G30700/AT1G31040/AT1G32450/AT1G69490/AT1G73220/AT1G76680/AT2G25460/AT2G31570/AT2G34610/AT2G44300/AT2G46950/AT3G05400/AT3G11340/AT3G25010/AT3G60670/AT4G01870/AT4G02380/AT4G15610/AT4G32940/AT5G24530/AT5G25930/AT5G35110/AT5G44610/AT5G52310/AT5G56870/AT5G59220/AT5G62165/AT5G63130
GO:0010150	leaf senescence	512	AT3G49940	LBD38	NOVEL	30/1885	198/30167	6.15e-06	0.000116428	30	AT1G02390/AT1G11190/AT1G20900/AT1G30700/AT1G32450/AT1G69490/AT1G76680/AT2G25460/AT2G31570/AT2G34610/AT2G37750/AT2G44300/AT2G46950/AT3G05400/AT3G11340/AT3G14060/AT3G25882/AT4G01870/AT4G02380/AT4G10500/AT4G15610/AT4G23810/AT4G32940/AT5G24530/AT5G37600/AT5G44160/AT5G44610/AT5G52310/AT5G59220/AT5G63130
GO:0010150	leaf senescence	513	AT1G25440	BBX15,COL16	NOVEL	24/1879	198/30167	0.00139029	0.0250885	24	AT1G01680/AT1G21000/AT1G32450/AT1G66830/AT1G69490/AT1G73500/AT1G76680/AT2G13810/AT2G39730/AT2G42540/AT2G46950/AT3G10985/AT3G25010/AT3G25882/AT3G26210/AT3G48080/AT4G01870/AT4G02380/AT4G32940/AT4G36040/AT5G24110/AT5G25930/AT5G52310/AT5G59220
GO:0010150	leaf senescence	514	AT5G22290	anac089,FSQ6,NAC089	NOVEL	36/1877	198/30167	5.99e-09	2.53e-07	36	AT1G02390/AT1G11190/AT1G32450/AT1G54130/AT1G69490/AT1G73500/AT1G76680/AT1G76980/AT2G18690/AT2G25460/AT2G35980/AT2G37750/AT2G44300/AT2G44480/AT2G46950/AT3G11340/AT3G14060/AT3G52430/AT3G56400/AT4G01870/AT4G02380/AT4G14365/AT4G15610/AT4G23810/AT4G32940/AT4G36040/AT5G24530/AT5G25930/AT5G37600/AT5G39050/AT5G51720/AT5G52310/AT5G59220/AT5G62000/AT5G62165/AT5G63130
GO:0010150	leaf senescence	515	AT3G12480	NF-YC11	NOVEL	30/1864	198/30167	4.94e-06	0.000114843	30	AT1G02390/AT1G11190/AT1G30700/AT1G31040/AT1G32450/AT1G54570/AT1G69490/AT1G76680/AT1G76980/AT2G18690/AT2G25460/AT2G35980/AT2G37750/AT2G39730/AT2G46950/AT3G11340/AT3G25882/AT4G01870/AT4G02380/AT4G10500/AT4G15610/AT4G23810/AT4G32940/AT5G24530/AT5G25930/AT5G37600/AT5G44610/AT5G52310/AT5G59220/AT5G62165
GO:0010150	leaf senescence	516	AT2G21230	bZIP30,DKM	NOVEL	28/1857	198/30167	3.43e-05	0.000611361	28	AT1G02390/AT1G30700/AT1G31040/AT1G32450/AT1G54570/AT1G73220/AT1G76680/AT2G13810/AT2G22300/AT2G25460/AT2G31570/AT2G35980/AT2G39200/AT2G44300/AT2G46950/AT3G05400/AT3G11340/AT4G01870/AT4G10500/AT4G15610/AT4G32940/AT5G24110/AT5G24530/AT5G25930/AT5G37600/AT5G44610/AT5G52310/AT5G62165
GO:0010150	leaf senescence	517	AT5G43250	NF-YC13	NOVEL	27/1854	198/30167	8.62e-05	0.0017653	27	AT1G01680/AT1G02390/AT1G20900/AT1G30700/AT1G32450/AT1G69490/AT1G73220/AT1G76680/AT2G25460/AT2G31570/AT2G34610/AT2G39200/AT2G42540/AT2G44300/AT2G44480/AT2G46950/AT3G14060/AT3G60670/AT4G01870/AT4G02380/AT4G15610/AT4G23810/AT4G32940/AT5G25930/AT5G44610/AT5G52310/AT5G56870
GO:0010150	leaf senescence	518	AT3G12130	KHZ1	NOVEL	29/1853	198/30167	1.23e-05	0.000304303	29	AT1G01680/AT1G02390/AT1G11190/AT1G30700/AT1G31040/AT1G32450/AT1G54570/AT1G69490/AT1G76680/AT2G13810/AT2G25460/AT2G37750/AT2G39730/AT2G46950/AT3G11340/AT3G25882/AT4G01870/AT4G02380/AT4G10500/AT4G12735/AT4G15610/AT4G32940/AT5G24110/AT5G24530/AT5G25930/AT5G37600/AT5G44610/AT5G52310/AT5G62165
GO:0010150	leaf senescence	519	AT3G24120	PHL2	NOVEL	32/1851	198/30167	4.9e-07	1.35e-05	32	AT1G02390/AT1G11190/AT1G30700/AT1G31040/AT1G32450/AT1G54570/AT1G69490/AT1G76680/AT2G13810/AT2G22300/AT2G25460/AT2G31570/AT2G35980/AT2G39730/AT2G44300/AT2G46950/AT3G05400/AT3G11340/AT3G25882/AT4G01870/AT4G02380/AT4G10500/AT4G15610/AT4G32940/AT5G24530/AT5G25930/AT5G37600/AT5G44610/AT5G52310/AT5G56870/AT5G62165/AT5G64940
GO:0010150	leaf senescence	520	AT3G56770	AT3G56770	NOVEL	23/1834	198/30167	0.0022126	0.0270617	23	AT1G11190/AT1G30700/AT1G32450/AT1G69490/AT1G73500/AT1G76680/AT1G76980/AT2G34610/AT2G35980/AT2G37750/AT2G44300/AT2G46950/AT3G05400/AT3G10985/AT3G11340/AT4G01870/AT4G02380/AT4G23810/AT4G32940/AT4G36040/AT5G39050/AT5G52310/AT5G62165
GO:0010150	leaf senescence	521	AT4G24470	AtTIFY1,GATA25,TIFY1,ZIM	NOVEL	35/1854	198/30167	1.5e-08	5.73e-07	35	AT1G01680/AT1G02390/AT1G11190/AT1G30700/AT1G31040/AT1G32450/AT1G54130/AT1G54570/AT1G69490/AT1G73220/AT1G76680/AT2G13810/AT2G31570/AT2G35980/AT2G39200/AT2G44300/AT2G46950/AT3G05400/AT3G11340/AT3G25010/AT3G25882/AT4G01870/AT4G02380/AT4G10500/AT4G15610/AT4G23810/AT4G32940/AT5G24530/AT5G25930/AT5G37600/AT5G44610/AT5G52310/AT5G62000/AT5G62165/AT5G64940
GO:0010150	leaf senescence	522	AT3G20310	ATERF-7,ATERF7,ERF7	NOVEL	38/1862	198/30167	3.7e-10	1.39e-08	38	AT1G02390/AT1G08050/AT1G11190/AT1G20900/AT1G21000/AT1G30700/AT1G32450/AT1G54130/AT1G54570/AT1G69490/AT1G73500/AT1G76680/AT1G76980/AT2G25460/AT2G31570/AT2G35980/AT2G37750/AT2G39200/AT2G39730/AT2G44300/AT2G44480/AT2G46950/AT3G10500/AT3G11340/AT4G01870/AT4G02380/AT4G15610/AT4G23810/AT4G30490/AT4G32940/AT5G24530/AT5G25930/AT5G44160/AT5G44610/AT5G52310/AT5G59220/AT5G62165/AT5G63130
GO:0010150	leaf senescence	523	AT4G02590	UNE12	NOVEL	30/1846	198/30167	4.08e-06	9.34e-05	30	AT1G01680/AT1G02390/AT1G11190/AT1G20900/AT1G30700/AT1G32450/AT1G54130/AT1G54570/AT1G76680/AT2G22300/AT2G39200/AT2G44300/AT2G44480/AT2G46950/AT3G05400/AT3G11340/AT3G25882/AT4G01870/AT4G02380/AT4G10500/AT4G12735/AT4G15610/AT4G32940/AT5G24530/AT5G25930/AT5G44610/AT5G52310/AT5G62000/AT5G62165/AT5G64940
GO:0010150	leaf senescence	524	AT3G14230	RAP2.2	NOVEL	30/1850	198/30167	4.25e-06	9.08e-05	30	AT1G02390/AT1G11190/AT1G30700/AT1G32450/AT1G54570/AT1G69490/AT1G73500/AT1G76680/AT1G76980/AT2G18690/AT2G25460/AT2G31570/AT2G37750/AT2G39200/AT2G39730/AT2G46950/AT3G25882/AT4G01870/AT4G02380/AT4G10500/AT4G15610/AT4G32940/AT5G24110/AT5G24530/AT5G37600/AT5G44160/AT5G44610/AT5G52310/AT5G59220/AT5G63130
GO:0010150	leaf senescence	525	AT1G51600	AT1G51600	NOVEL	29/1833	198/30167	1e-05	0.00022093	29	AT1G01680/AT1G02390/AT1G11190/AT1G30700/AT1G31040/AT1G32450/AT1G54570/AT1G73220/AT1G76680/AT2G35980/AT2G44300/AT2G44480/AT2G46950/AT3G05400/AT3G11340/AT3G25882/AT4G01870/AT4G02380/AT4G10500/AT4G15610/AT4G32940/AT5G24110/AT5G24530/AT5G25930/AT5G37600/AT5G44610/AT5G62000/AT5G62165/AT5G64940
GO:0010150	leaf senescence	526	AT4G29230	anac075,NAC075	NOVEL	22/1821	198/30167	0.00429947	0.0425932	22	AT1G02390/AT1G11190/AT1G20900/AT1G30700/AT1G31040/AT1G32450/AT1G73220/AT1G76680/AT2G34610/AT2G35980/AT2G44480/AT2G46950/AT3G05400/AT3G10985/AT3G11340/AT3G60670/AT4G01870/AT4G02380/AT4G12735/AT5G35110/AT5G44610/AT5G52310
GO:0010150	leaf senescence	527	AT4G24020	NLP7	NOVEL	28/1828	198/30167	2.6e-05	0.000513063	28	AT1G02390/AT1G11190/AT1G30700/AT1G32450/AT1G54570/AT1G69490/AT1G76680/AT2G13810/AT2G22300/AT2G25460/AT2G35980/AT2G44300/AT2G46950/AT3G05400/AT3G11340/AT3G25882/AT4G01870/AT4G10500/AT4G15610/AT4G32940/AT5G03280/AT5G24110/AT5G24530/AT5G25930/AT5G37600/AT5G44610/AT5G52310/AT5G62165
GO:0010150	leaf senescence	528	AT1G21450	SCL1	NOVEL	31/1823	198/30167	1.08e-06	2.57e-05	31	AT1G01680/AT1G02390/AT1G11190/AT1G30700/AT1G32450/AT1G54130/AT1G54570/AT1G76680/AT2G13810/AT2G22300/AT2G25460/AT2G31570/AT2G39200/AT2G44300/AT2G46950/AT3G05400/AT3G11340/AT3G25882/AT4G01870/AT4G02380/AT4G10500/AT4G15610/AT4G23810/AT4G32940/AT5G24530/AT5G25930/AT5G37600/AT5G44610/AT5G52310/AT5G62165/AT5G64940
GO:0010150	leaf senescence	529	AT5G41020	AT5G41020	NOVEL	32/1827	198/30167	3.68e-07	1.07e-05	32	AT1G02390/AT1G11190/AT1G20900/AT1G30700/AT1G32450/AT1G69490/AT1G73500/AT1G76680/AT2G18690/AT2G25460/AT2G31570/AT2G35980/AT2G37750/AT2G44300/AT2G46950/AT3G11340/AT3G60670/AT4G01870/AT4G02380/AT4G10500/AT4G15610/AT4G23810/AT4G36040/AT5G03280/AT5G24530/AT5G25930/AT5G37600/AT5G44610/AT5G52310/AT5G59220/AT5G62165/AT5G63130
GO:0010150	leaf senescence	530	AT1G72740	AT1G72740	NOVEL	32/1818	198/30167	3.3e-07	1.07e-05	32	AT1G01680/AT1G02390/AT1G11190/AT1G30700/AT1G32450/AT1G54130/AT1G54570/AT1G69490/AT1G73220/AT1G76680/AT2G13810/AT2G22300/AT2G39200/AT2G44300/AT2G46950/AT3G05400/AT3G11340/AT3G25882/AT4G01870/AT4G10500/AT4G12735/AT4G15610/AT4G23810/AT4G32940/AT5G24110/AT5G24530/AT5G25930/AT5G37600/AT5G44610/AT5G52310/AT5G62000/AT5G62165
GO:0010150	leaf senescence	531	AT2G37120	AT2G37120	NOVEL	30/1817	198/30167	2.97e-06	9.93e-05	30	AT1G01680/AT1G11190/AT1G30700/AT1G31040/AT1G32450/AT1G54570/AT1G64140/AT1G69490/AT1G76680/AT2G13810/AT2G25460/AT2G35980/AT2G37750/AT2G39730/AT2G46950/AT3G11340/AT3G25882/AT4G01870/AT4G02380/AT4G10500/AT4G15610/AT4G32940/AT5G24110/AT5G24530/AT5G25930/AT5G37600/AT5G44610/AT5G52310/AT5G62000/AT5G62165
GO:0010150	leaf senescence	532	AT5G18830	AT5G18830	NOVEL	30/1815	198/30167	2.91e-06	5.51e-05	30	AT1G02390/AT1G11190/AT1G30700/AT1G32450/AT1G54130/AT1G54570/AT1G69490/AT1G76680/AT1G76980/AT2G22300/AT2G25460/AT2G31570/AT2G37750/AT2G39200/AT2G44300/AT2G46950/AT3G11340/AT4G01870/AT4G02380/AT4G15610/AT4G32940/AT4G36040/AT5G24530/AT5G25930/AT5G37600/AT5G44160/AT5G44610/AT5G52310/AT5G62165/AT5G63130
GO:0010150	leaf senescence	533	AT3G10030	AT3G10030	NOVEL	26/1799	198/30167	0.000133082	0.00178285	26	AT1G02390/AT1G11190/AT1G30700/AT1G32450/AT1G54570/AT1G76680/AT2G13810/AT2G25460/AT2G44300/AT2G44480/AT2G46950/AT3G05400/AT3G11340/AT3G25882/AT4G01870/AT4G02380/AT4G10500/AT4G15610/AT4G32940/AT4G36040/AT5G24530/AT5G25930/AT5G37600/AT5G44610/AT5G52310/AT5G62165
GO:0010150	leaf senescence	534	AT4G35580	CBNAC,NTL9	NOVEL	31/1801	198/30167	8.33e-07	2.45e-05	31	AT1G01680/AT1G02390/AT1G30700/AT1G32450/AT1G54570/AT1G69490/AT1G76680/AT2G13810/AT2G22300/AT2G25460/AT2G31570/AT2G35980/AT2G39730/AT2G44300/AT2G46950/AT3G05400/AT3G11340/AT3G25882/AT4G01870/AT4G02380/AT4G10500/AT4G15610/AT4G32940/AT4G36040/AT5G24530/AT5G25930/AT5G37600/AT5G44610/AT5G52310/AT5G62000/AT5G62165
GO:0010150	leaf senescence	535	AT3G18990	REM39,VRN1	NOVEL	31/1813	198/30167	9.58e-07	2.15e-05	31	AT1G02390/AT1G08050/AT1G20900/AT1G30700/AT1G32450/AT1G54040/AT1G54570/AT1G76680/AT2G25460/AT2G31570/AT2G37750/AT2G39200/AT2G44300/AT2G46950/AT3G25882/AT3G60670/AT4G01870/AT4G02380/AT4G10500/AT4G15610/AT4G23810/AT4G32940/AT5G24530/AT5G25930/AT5G44160/AT5G44610/AT5G52310/AT5G59220/AT5G62165/AT5G63130/AT5G64940
GO:0010150	leaf senescence	536	AT4G36060	bHLH11	NOVEL	22/1790	198/30167	0.00351246	0.0353282	22	AT1G02390/AT1G21000/AT1G30700/AT1G32450/AT1G54570/AT1G73220/AT1G73500/AT1G76680/AT2G25460/AT2G34610/AT2G44300/AT3G07350/AT3G10985/AT3G11340/AT3G60670/AT4G01870/AT4G02380/AT4G15610/AT4G32940/AT4G36040/AT5G25930/AT5G52310
GO:0010150	leaf senescence	537	AT4G38900	bZIP29,DKML	NOVEL	28/1793	198/30167	1.84e-05	0.000358277	28	AT1G01680/AT1G02390/AT1G30700/AT1G32450/AT1G54130/AT1G54570/AT1G76680/AT2G13810/AT2G25460/AT2G31570/AT2G35980/AT2G44300/AT2G46950/AT3G11340/AT3G25882/AT4G01870/AT4G10500/AT4G12735/AT4G15610/AT4G23810/AT4G32940/AT5G24110/AT5G24530/AT5G25930/AT5G37600/AT5G44610/AT5G52310/AT5G62165
GO:0010150	leaf senescence	538	AT2G46590	DAG2	NOVEL	27/1779	198/30167	4.3e-05	0.00114042	27	AT1G02390/AT1G11190/AT1G20900/AT1G30700/AT1G32450/AT1G54570/AT1G73220/AT1G76680/AT1G76980/AT2G25460/AT2G34610/AT2G44300/AT2G46950/AT3G05400/AT3G07350/AT3G11340/AT3G60670/AT4G01870/AT4G02380/AT4G15610/AT4G36040/AT5G35110/AT5G44160/AT5G52300/AT5G52310/AT5G59220/AT5G63130
GO:0010150	leaf senescence	539	AT3G16280	AT3G16280	NOVEL	24/1776	198/30167	0.000642897	0.00769498	24	AT1G02390/AT1G20900/AT1G30700/AT1G32450/AT1G76680/AT2G25460/AT2G34610/AT2G44300/AT2G46950/AT3G05400/AT3G11340/AT3G25010/AT3G25882/AT4G01870/AT4G02380/AT4G12735/AT4G15610/AT4G23810/AT5G24110/AT5G25930/AT5G44160/AT5G44610/AT5G52310/AT5G59220
GO:0010150	leaf senescence	540	AT5G06950	AHBP-1B,AtTGA2,TGA2	NOVEL	26/1781	198/30167	0.000113348	0.00167884	26	AT1G01680/AT1G02390/AT1G32450/AT1G54130/AT1G54570/AT1G76680/AT2G13810/AT2G22300/AT2G35980/AT2G44300/AT2G46950/AT3G05400/AT3G11340/AT3G25010/AT3G25882/AT4G01870/AT4G02380/AT4G10500/AT4G15610/AT4G32940/AT5G24530/AT5G25930/AT5G37600/AT5G44610/AT5G52310/AT5G62165
GO:0010150	leaf senescence	541	AT2G47070	SPL1	NOVEL	31/1784	198/30167	6.81e-07	2.04e-05	31	AT1G02390/AT1G30700/AT1G32450/AT1G54130/AT1G54570/AT1G69490/AT1G76680/AT2G13810/AT2G22300/AT2G25460/AT2G31570/AT2G35980/AT2G44300/AT2G44480/AT2G46950/AT3G11340/AT3G25882/AT4G01870/AT4G10500/AT4G12735/AT4G15610/AT4G23810/AT4G32940/AT5G24110/AT5G24530/AT5G25930/AT5G37600/AT5G44610/AT5G52310/AT5G62165/AT5G64940
GO:0010150	leaf senescence	542	AT5G52510	SCL8	NOVEL	33/1792	198/30167	7.42e-08	1.58e-06	33	AT1G02390/AT1G08050/AT1G11190/AT1G30700/AT1G32450/AT1G54570/AT1G76680/AT1G76980/AT2G25460/AT2G30550/AT2G31570/AT2G37750/AT2G39200/AT2G44300/AT2G46950/AT3G07350/AT3G11340/AT3G25882/AT4G01870/AT4G02380/AT4G10500/AT4G15610/AT4G23810/AT4G30490/AT4G32940/AT5G24530/AT5G25930/AT5G39050/AT5G44160/AT5G44610/AT5G52310/AT5G62165/AT5G63130
GO:0010150	leaf senescence	543	AT5G03510	AT5G03510	NOVEL	30/1777	198/30167	1.9e-06	4.63e-05	30	AT1G01680/AT1G02390/AT1G11190/AT1G17020/AT1G30700/AT1G32450/AT1G54570/AT1G76680/AT1G76980/AT2G18690/AT2G25460/AT2G31570/AT2G34610/AT2G43000/AT2G44300/AT2G44480/AT2G46950/AT3G11340/AT4G01870/AT4G02380/AT4G10500/AT4G15610/AT4G23810/AT4G32940/AT5G24530/AT5G25930/AT5G44610/AT5G52300/AT5G52310/AT5G56870
GO:0010150	leaf senescence	544	AT1G09770	ATCDC5,ATMYBCDC5,CDC5	NOVEL	27/1782	198/30167	4.42e-05	0.000668611	27	AT1G01680/AT1G02390/AT1G30700/AT1G32450/AT1G69490/AT1G76680/AT2G13810/AT2G22300/AT2G25460/AT2G44300/AT2G46950/AT3G05400/AT3G11340/AT3G25882/AT4G01870/AT4G02380/AT4G10500/AT4G12735/AT4G15610/AT4G32940/AT5G24530/AT5G25930/AT5G37600/AT5G44610/AT5G52310/AT5G62165/AT5G64940
GO:0010150	leaf senescence	545	AT2G40140	ATSZF2,CZF1,SZF2,TZF10,ZFAR1	NOVEL	40/1787	198/30167	7.05e-12	3.08e-10	40	AT1G02390/AT1G11190/AT1G30700/AT1G32450/AT1G54570/AT1G69490/AT1G73500/AT1G76680/AT1G76980/AT2G18690/AT2G22300/AT2G25460/AT2G25625/AT2G31570/AT2G34610/AT2G37750/AT2G44300/AT2G46950/AT3G10500/AT3G11340/AT3G22910/AT3G25882/AT3G52430/AT3G56400/AT4G01870/AT4G02380/AT4G10500/AT4G14365/AT4G15610/AT4G23810/AT4G32940/AT5G24530/AT5G25930/AT5G37600/AT5G44610/AT5G52310/AT5G56870/AT5G59220/AT5G62000/AT5G63130
GO:0010150	leaf senescence	546	AT4G13980	AT4G13980	NOVEL	25/1775	198/30167	0.000267377	0.00308511	25	AT1G01680/AT1G02390/AT1G11190/AT1G30700/AT1G32450/AT1G54130/AT1G54570/AT1G76680/AT2G13810/AT2G22300/AT2G25460/AT2G44300/AT2G46950/AT3G05400/AT3G25882/AT4G01870/AT4G10500/AT4G15610/AT4G32940/AT5G24530/AT5G25930/AT5G37600/AT5G44610/AT5G52310/AT5G62165
GO:0010150	leaf senescence	547	AT1G07530	ATGRAS2,GRAS2,SCL14	NOVEL	28/1772	198/30167	1.48e-05	0.000294758	28	AT1G02390/AT1G32450/AT1G54130/AT1G54570/AT1G69490/AT1G76680/AT2G13810/AT2G22300/AT2G25460/AT2G35980/AT2G39730/AT2G44300/AT2G44480/AT2G46950/AT3G11340/AT3G25882/AT4G01870/AT4G02380/AT4G10500/AT4G15610/AT4G32940/AT4G36040/AT5G24530/AT5G25930/AT5G37600/AT5G44610/AT5G52310/AT5G62165
GO:0010150	leaf senescence	548	AT1G51070	bHLH115	NOVEL	27/1773	198/30167	4.06e-05	0.000610115	27	AT1G02390/AT1G11190/AT1G20900/AT1G30700/AT1G32450/AT1G54040/AT1G76980/AT2G22300/AT2G25460/AT2G31570/AT2G37750/AT2G44300/AT2G46950/AT3G11340/AT3G14060/AT3G60670/AT4G01870/AT4G02380/AT4G10500/AT4G15610/AT4G32940/AT5G24530/AT5G25930/AT5G44160/AT5G44610/AT5G52310/AT5G56870
GO:0010150	leaf senescence	549	AT2G38880	AT2G38880	NOVEL	31/1770	198/30167	5.76e-07	1.94e-05	31	AT1G01680/AT1G02390/AT1G20900/AT1G30700/AT1G31040/AT1G32450/AT1G54570/AT1G69490/AT1G76680/AT2G13810/AT2G22300/AT2G25460/AT2G31570/AT2G44300/AT2G46950/AT3G05400/AT3G11340/AT3G25882/AT4G01870/AT4G02380/AT4G10500/AT4G15610/AT4G32940/AT5G24110/AT5G24530/AT5G25930/AT5G37600/AT5G44610/AT5G52310/AT5G62000/AT5G62165
GO:0010150	leaf senescence	550	AT5G48150	PAT1	NOVEL	27/1766	198/30167	3.79e-05	0.000633233	27	AT1G02390/AT1G30700/AT1G32450/AT1G54570/AT1G69490/AT1G76680/AT2G13810/AT2G22300/AT2G25460/AT2G44300/AT2G46950/AT3G05400/AT3G11340/AT3G25882/AT3G56400/AT4G01870/AT4G10500/AT4G15610/AT4G32940/AT5G24530/AT5G25930/AT5G37600/AT5G44610/AT5G52310/AT5G62000/AT5G62165/AT5G64940
GO:0010150	leaf senescence	551	AT2G43000	ANAC042,AtJUB1,JUB1,NAC042	KNOWN	45/1759	198/30167	2.17e-15	1.81e-13	45	AT1G01680/AT1G02390/AT1G11190/AT1G30700/AT1G32450/AT1G34420/AT1G36622/AT1G66880/AT1G73500/AT1G76680/AT1G76980/AT2G13810/AT2G18690/AT2G22300/AT2G25460/AT2G30550/AT2G31570/AT2G34610/AT2G35980/AT2G37750/AT2G39200/AT2G44480/AT3G11340/AT3G25010/AT3G25882/AT3G26210/AT4G01250/AT4G01870/AT4G02380/AT4G10500/AT4G12735/AT4G15610/AT4G18980/AT4G23810/AT4G30490/AT4G32940/AT4G36040/AT5G24110/AT5G24530/AT5G25930…
GO:0010150	leaf senescence	552	AT2G25000	ATWRKY60,WRKY60	NOVEL	33/1751	198/30167	4.31e-08	2.39e-06	33	AT1G01680/AT1G02390/AT1G30700/AT1G32450/AT1G76680/AT2G13810/AT2G18690/AT2G25460/AT2G31570/AT2G34610/AT2G35980/AT2G37750/AT2G43000/AT2G44480/AT2G46950/AT3G10985/AT3G11340/AT3G25010/AT3G25882/AT4G01870/AT4G02380/AT4G10500/AT4G12735/AT4G14370/AT4G15610/AT4G22750/AT5G24110/AT5G24530/AT5G25930/AT5G37600/AT5G44610/AT5G52310/AT5G56870
GO:0010150	leaf senescence	553	AT3G18380	DTF2,SHH2	NOVEL	27/1752	198/30167	3.31e-05	0.000749834	27	AT1G02390/AT1G11190/AT1G30700/AT1G31040/AT1G32450/AT1G54130/AT1G54570/AT1G76680/AT2G13810/AT2G31570/AT2G35980/AT2G44300/AT2G44480/AT2G46950/AT3G05400/AT3G11340/AT3G25882/AT4G01870/AT4G02380/AT4G10500/AT4G15610/AT4G32940/AT5G24530/AT5G25930/AT5G37600/AT5G44610/AT5G62165
GO:0010150	leaf senescence	554	AT5G06420	AT5G06420	NOVEL	24/1759	198/30167	0.00056173	0.00826254	24	AT1G02390/AT1G11190/AT1G20900/AT1G30700/AT1G32450/AT1G69490/AT1G76680/AT2G25460/AT2G34610/AT2G39200/AT2G44300/AT2G46950/AT3G05400/AT3G25010/AT3G56400/AT4G01870/AT4G02380/AT4G15610/AT4G23810/AT4G36040/AT5G24530/AT5G25930/AT5G52310/AT5G62165
GO:0010150	leaf senescence	555	AT4G00540	ATMYB3R2,MYB3R-2,MYB3R2,PC-MYB2	NOVEL	22/1739	198/30167	0.00248197	0.0420243	22	AT1G02390/AT1G13990/AT1G73500/AT1G76680/AT2G25460/AT2G30550/AT2G39200/AT2G43000/AT3G10985/AT3G25010/AT3G29035/AT4G01250/AT4G01870/AT4G02380/AT4G10500/AT4G23810/AT4G36040/AT5G24530/AT5G37600/AT5G52310/AT5G63130/AT5G64940
GO:0010150	leaf senescence	556	AT1G33240	AT-GTL1,ATGTL1,GTL1	NOVEL	30/1749	198/30167	1.38e-06	3.58e-05	30	AT1G02390/AT1G11190/AT1G30700/AT1G32450/AT1G54570/AT1G76680/AT2G22300/AT2G35980/AT2G39200/AT2G44300/AT2G44480/AT2G46950/AT3G05400/AT3G11340/AT3G25882/AT3G60670/AT4G10500/AT4G15610/AT4G23810/AT4G32940/AT5G03280/AT5G24110/AT5G24530/AT5G25930/AT5G37600/AT5G44610/AT5G52310/AT5G62000/AT5G62165/AT5G64940
GO:0010150	leaf senescence	557	AT5G63260	AT5G63260	NOVEL	28/1743	198/30167	1.1e-05	0.000221253	28	AT1G01680/AT1G02390/AT1G30700/AT1G32450/AT1G54130/AT1G54570/AT1G76680/AT2G13810/AT2G25460/AT2G31570/AT2G39200/AT2G44300/AT2G46950/AT3G05400/AT3G11340/AT3G25010/AT3G25882/AT4G01870/AT4G10500/AT4G15610/AT4G32940/AT4G36040/AT5G24530/AT5G25930/AT5G37600/AT5G44610/AT5G52310/AT5G62165
GO:0010150	leaf senescence	558	AT1G64530	NLP6	NOVEL	28/1750	198/30167	1.18e-05	0.000184681	28	AT1G02390/AT1G11190/AT1G20900/AT1G30700/AT1G32450/AT1G73500/AT1G76680/AT2G25460/AT2G31570/AT2G37750/AT2G39200/AT2G44300/AT2G46950/AT3G11340/AT4G01870/AT4G02380/AT4G10500/AT4G15610/AT4G23810/AT4G32940/AT4G36040/AT5G24530/AT5G25930/AT5G37600/AT5G44160/AT5G44610/AT5G52310/AT5G62165
GO:0010150	leaf senescence	559	AT1G69490	ANAC029,ATNAP,NAP	KNOWN	30/1748	198/30167	1.36e-06	5.11e-05	30	AT1G01680/AT1G02390/AT1G32450/AT1G36622/AT1G54040/AT1G54130/AT1G66830/AT1G66880/AT1G73500/AT1G76680/AT2G13810/AT2G22300/AT2G34610/AT2G42540/AT2G44300/AT3G14067/AT3G22910/AT3G25010/AT3G25882/AT3G43230/AT4G02380/AT4G23810/AT4G32940/AT5G24110/AT5G39610/AT5G51720/AT5G52310/AT5G62165/AT5G63130/AT5G64940
GO:0010150	leaf senescence	560	AT3G02990	ATHSFA1E,HSFA1E	NOVEL	34/1751	198/30167	1.26e-08	3.88e-07	34	AT1G02390/AT1G21000/AT1G30700/AT1G32450/AT1G73500/AT1G76680/AT2G18690/AT2G25460/AT2G31570/AT2G37750/AT2G39730/AT2G43000/AT2G44300/AT2G46950/AT3G11340/AT3G25882/AT3G56400/AT3G60670/AT4G01870/AT4G02380/AT4G10500/AT4G15610/AT4G23810/AT4G32940/AT5G03280/AT5G24530/AT5G25930/AT5G37600/AT5G44610/AT5G52300/AT5G52310/AT5G59220/AT5G63130/AT5G64940
GO:0010150	leaf senescence	561	AT3G49530	ANAC062,NAC062,NTL6	NOVEL	30/1744	198/30167	1.3e-06	2.4e-05	30	AT1G02390/AT1G08050/AT1G11190/AT1G30700/AT1G32450/AT1G73500/AT1G76680/AT2G18690/AT2G25460/AT2G31570/AT2G34610/AT2G37750/AT2G39200/AT2G44300/AT2G46950/AT3G11340/AT3G14060/AT3G22910/AT4G01870/AT4G02380/AT4G14370/AT4G15610/AT4G23810/AT4G32940/AT5G24530/AT5G25930/AT5G44610/AT5G52310/AT5G62165/AT5G63130
GO:0010150	leaf senescence	562	AT5G63470	NF-YC4	NOVEL	28/1746	198/30167	1.13e-05	0.000196978	28	AT1G02390/AT1G11190/AT1G30700/AT1G32450/AT1G54130/AT1G54570/AT1G69490/AT1G76680/AT2G25460/AT2G31570/AT2G44300/AT2G46950/AT3G11340/AT3G25882/AT4G01870/AT4G02380/AT4G10500/AT4G12735/AT4G15610/AT4G32940/AT4G36040/AT5G24530/AT5G25930/AT5G37600/AT5G44610/AT5G52310/AT5G62000/AT5G62165
GO:0010150	leaf senescence	563	AT2G28510	DOF2.1	NOVEL	27/1718	198/30167	2.35e-05	0.000509498	27	AT1G11190/AT1G20900/AT1G30700/AT1G31040/AT1G32450/AT1G54570/AT1G69490/AT1G73220/AT1G76680/AT2G25460/AT2G34610/AT2G37750/AT2G44300/AT2G46950/AT3G05400/AT3G11340/AT3G60670/AT4G01870/AT4G02380/AT4G15610/AT4G32940/AT4G36040/AT5G44160/AT5G52300/AT5G52310/AT5G62165/AT5G63130
GO:0010150	leaf senescence	564	AT1G72050	TFIIIA	NOVEL	30/1731	198/30167	1.11e-06	3.84e-05	30	AT1G01680/AT1G02390/AT1G31040/AT1G32450/AT1G54040/AT1G54570/AT1G69490/AT1G76680/AT2G13810/AT2G25460/AT2G31570/AT2G35980/AT2G44300/AT2G46950/AT3G05400/AT3G11340/AT3G25882/AT3G60670/AT4G01870/AT4G02380/AT4G10500/AT4G12735/AT4G15610/AT4G32940/AT5G24530/AT5G25930/AT5G37600/AT5G44610/AT5G52310/AT5G62165
GO:0010150	leaf senescence	565	AT1G28050	BBX13	NOVEL	27/1724	198/30167	2.5e-05	0.000512232	27	AT1G02390/AT1G30700/AT1G32450/AT1G54130/AT1G54570/AT1G73500/AT1G76680/AT2G18690/AT2G22300/AT2G25460/AT2G34610/AT2G39200/AT2G44300/AT2G46950/AT3G56400/AT4G01870/AT4G02380/AT4G15610/AT4G23810/AT4G30490/AT4G32940/AT4G36040/AT5G24530/AT5G25930/AT5G37600/AT5G52310/AT5G62165
GO:0010150	leaf senescence	566	AT1G14685	ATBPC2,BBR/BPC2,BPC2	NOVEL	25/1729	198/30167	0.000179608	0.002459	25	AT1G11190/AT1G30700/AT1G32450/AT1G54570/AT1G69490/AT1G76680/AT2G25460/AT2G37750/AT2G44300/AT2G46950/AT3G05400/AT3G11340/AT3G25882/AT4G01870/AT4G02380/AT4G10500/AT4G15610/AT4G32940/AT5G24530/AT5G25930/AT5G37600/AT5G44610/AT5G52310/AT5G62000/AT5G62165
GO:0010150	leaf senescence	567	AT5G23090	NF-YB13	NOVEL	30/1728	198/30167	1.08e-06	2.67e-05	30	AT1G02390/AT1G11190/AT1G30700/AT1G32450/AT1G54570/AT1G69490/AT1G76680/AT2G13810/AT2G35980/AT2G44300/AT2G46950/AT3G05400/AT3G11340/AT3G25882/AT3G56400/AT4G01870/AT4G02380/AT4G10500/AT4G15610/AT4G32940/AT4G36040/AT5G24110/AT5G24530/AT5G25930/AT5G37600/AT5G44610/AT5G52310/AT5G62000/AT5G62165/AT5G64940
GO:0010150	leaf senescence	568	AT4G24540	AGL24	NOVEL	27/1718	198/30167	2.35e-05	0.0005776	27	AT1G01680/AT1G02390/AT1G21000/AT1G32450/AT1G36622/AT1G66830/AT1G66880/AT1G69490/AT1G73500/AT1G76680/AT2G39730/AT2G44300/AT3G07350/AT3G10985/AT3G25010/AT3G25882/AT3G56400/AT4G02380/AT4G10500/AT4G23810/AT4G32940/AT4G34060/AT4G36040/AT5G24110/AT5G51720/AT5G52310/AT5G62165
GO:0010150	leaf senescence	569	AT1G71130	AtERF070,CRF8,ERF070	NOVEL	30/1722	198/30167	1e-06	3.21e-05	30	AT1G01680/AT1G02390/AT1G20900/AT1G30700/AT1G32450/AT1G54570/AT1G69490/AT1G73500/AT1G76680/AT2G22300/AT2G25460/AT2G35980/AT2G44300/AT2G44480/AT2G46950/AT3G05400/AT3G11340/AT3G25882/AT3G56400/AT4G01870/AT4G10500/AT4G32940/AT5G24530/AT5G25930/AT5G37600/AT5G44610/AT5G52310/AT5G62000/AT5G62165/AT5G64940
GO:0010150	leaf senescence	570	AT5G07680	ANAC079,ANAC080,ATNAC4,NAC080,NAC4	NOVEL	30/1703	198/30167	7.97e-07	2.94e-05	30	AT1G02390/AT1G20900/AT1G30700/AT1G32450/AT1G73220/AT1G73500/AT1G76680/AT2G13810/AT2G18690/AT2G25460/AT2G34610/AT2G37750/AT2G44300/AT2G46950/AT3G05400/AT3G07350/AT3G11340/AT3G14060/AT4G01870/AT4G02380/AT4G10500/AT4G15610/AT4G32940/AT4G36040/AT5G24530/AT5G37600/AT5G52310/AT5G56870/AT5G59220/AT5G62165
GO:0010150	leaf senescence	571	AT5G12850	TZF8	NOVEL	26/1698	198/30167	5.22e-05	0.000824765	26	AT1G01680/AT1G02390/AT1G11190/AT1G30700/AT1G32450/AT1G54130/AT1G54570/AT1G76680/AT2G13810/AT2G22300/AT2G31570/AT2G35980/AT2G44300/AT2G46950/AT3G11340/AT3G25882/AT4G01870/AT4G10500/AT4G15610/AT4G32940/AT5G24530/AT5G25930/AT5G37600/AT5G44610/AT5G52310/AT5G62165
GO:0010150	leaf senescence	572	AT2G27050	AtEIL1,EIL1	NOVEL	31/1700	198/30167	2.42e-07	7.49e-06	31	AT1G02390/AT1G30700/AT1G32450/AT1G54570/AT1G76680/AT2G13810/AT2G18690/AT2G22300/AT2G25460/AT2G39200/AT2G44300/AT2G46950/AT3G05400/AT3G11340/AT3G25882/AT3G56400/AT4G01870/AT4G02380/AT4G10500/AT4G15610/AT4G23810/AT4G32940/AT5G24110/AT5G24530/AT5G25930/AT5G37600/AT5G44610/AT5G51720/AT5G52310/AT5G62165/AT5G64940
GO:0010150	leaf senescence	573	AT2G01930	ATBPC1,BBR,BPC1	NOVEL	27/1696	198/30167	1.88e-05	0.000371027	27	AT1G02390/AT1G30700/AT1G32450/AT1G54570/AT1G69490/AT1G76680/AT2G25460/AT2G35980/AT2G39200/AT2G44300/AT2G46950/AT3G05400/AT3G11340/AT3G25010/AT3G25882/AT4G01870/AT4G02380/AT4G10500/AT4G15610/AT4G32940/AT5G24530/AT5G25930/AT5G44610/AT5G52310/AT5G56870/AT5G62000/AT5G62165
GO:0010150	leaf senescence	574	AT2G47210	ATSWC4,SWC4	NOVEL	27/1697	198/30167	1.9e-05	0.000394125	27	AT1G01680/AT1G02390/AT1G30700/AT1G32450/AT1G54130/AT1G54570/AT1G73220/AT1G76680/AT2G13810/AT2G22300/AT2G35980/AT2G44300/AT2G46950/AT3G05400/AT3G11340/AT3G25882/AT4G01870/AT4G02380/AT4G10500/AT4G15610/AT4G32940/AT5G24530/AT5G25930/AT5G37600/AT5G44610/AT5G52310/AT5G62165
GO:0010150	leaf senescence	575	AT5G24590	ANAC091,ANAC91,TIP	NOVEL	32/1707	198/30167	8.04e-08	1.75e-06	32	AT1G02390/AT1G11190/AT1G21000/AT1G30700/AT1G32450/AT1G69490/AT1G73500/AT1G76680/AT1G76980/AT2G18690/AT2G25460/AT2G31570/AT2G37750/AT2G44300/AT2G46950/AT3G11340/AT3G14060/AT3G56400/AT4G01870/AT4G02380/AT4G10500/AT4G15610/AT4G23810/AT4G30490/AT4G32940/AT5G24530/AT5G25930/AT5G44610/AT5G52310/AT5G59220/AT5G62000/AT5G63130
GO:0010150	leaf senescence	576	AT5G23280	AtTCP7,TCP7	NOVEL	29/1706	198/30167	2.52e-06	4.47e-05	29	AT1G02390/AT1G08050/AT1G32450/AT1G54130/AT1G54570/AT1G73500/AT1G76680/AT2G25460/AT2G25625/AT2G31570/AT3G25010/AT3G25882/AT3G52430/AT3G56400/AT4G01870/AT4G02380/AT4G15610/AT4G23810/AT4G32940/AT4G36040/AT5G24530/AT5G25930/AT5G37600/AT5G44160/AT5G52310/AT5G59220/AT5G62000/AT5G62165/AT5G63130
GO:0010150	leaf senescence	577	AT4G36920	AP2,AtAP2,FL1,FLO2	NOVEL	34/1705	198/30167	6.5e-09	1.98e-07	34	AT1G02390/AT1G08050/AT1G11190/AT1G30700/AT1G32450/AT1G54570/AT1G69490/AT1G76680/AT1G76980/AT2G25460/AT2G31570/AT2G37750/AT2G39200/AT2G39730/AT2G44300/AT2G46950/AT3G11340/AT3G25882/AT4G01870/AT4G02380/AT4G10500/AT4G15610/AT4G23810/AT4G30490/AT4G32940/AT4G36040/AT5G24530/AT5G25930/AT5G37600/AT5G44610/AT5G52310/AT5G56870/AT5G62165/AT5G63130
GO:0010150	leaf senescence	578	AT1G68840	AtRAV2,EDF2,RAP2.8,RAV2,TEM2	NOVEL	37/1703	198/30167	1.16e-10	4.51e-09	37	AT1G02390/AT1G11190/AT1G21000/AT1G30700/AT1G32450/AT1G54570/AT1G66880/AT1G69490/AT1G73500/AT1G76680/AT2G18690/AT2G25460/AT2G37750/AT2G39200/AT2G43000/AT2G44300/AT2G46950/AT3G11340/AT3G25882/AT3G52430/AT3G56400/AT4G01870/AT4G02380/AT4G10500/AT4G15610/AT4G23810/AT4G32940/AT4G36040/AT5G24530/AT5G25930/AT5G37600/AT5G44610/AT5G52310/AT5G59220/AT5G62000/AT5G62165/AT5G63130
GO:0010150	leaf senescence	579	AT3G50260	ATERF#011,CEJ1,DEAR1	NOVEL	41/1684	198/30167	2.47e-13	1.69e-11	41	AT1G01680/AT1G02390/AT1G11190/AT1G18210/AT1G30700/AT1G32450/AT1G34420/AT1G76680/AT1G76980/AT2G13810/AT2G18690/AT2G22300/AT2G25460/AT2G34610/AT2G35980/AT2G37750/AT2G39200/AT2G43000/AT2G44480/AT3G25010/AT3G25882/AT3G26210/AT3G29035/AT3G48020/AT3G56400/AT4G01250/AT4G01870/AT4G02380/AT4G10500/AT4G12735/AT4G15610/AT4G23810/AT4G32940/AT4G36040/AT5G24530/AT5G25930/AT5G37600/AT5G52310/AT5G56870/AT5G59220…
GO:0010150	leaf senescence	580	AT3G47710	BHLH161,BNQ3	NOVEL	21/1669	198/30167	0.00330983	0.0368033	21	AT1G01680/AT1G02390/AT1G11190/AT1G30700/AT1G36622/AT1G76680/AT2G25460/AT2G30550/AT2G35980/AT2G39200/AT2G43000/AT4G01250/AT4G02380/AT4G15610/AT4G23810/AT4G30490/AT4G36040/AT5G24110/AT5G37600/AT5G44610/AT5G52310
GO:0010150	leaf senescence	581	AT1G07980	NF-YC10	NOVEL	26/1682	198/30167	4.46e-05	0.00076718	26	AT1G02390/AT1G30700/AT1G32450/AT1G54130/AT1G54570/AT1G69490/AT1G76680/AT2G13810/AT2G22300/AT2G37750/AT2G44300/AT2G46950/AT3G11340/AT4G01870/AT4G02380/AT4G10500/AT4G15610/AT4G32940/AT5G24110/AT5G24530/AT5G25930/AT5G37600/AT5G44610/AT5G52310/AT5G62000/AT5G62165
GO:0010150	leaf senescence	582	AT5G64530	ANAC104,XND1	NOVEL	35/1681	198/30167	1.23e-09	6.9e-08	35	AT1G01230/AT1G01680/AT1G02390/AT1G18210/AT1G21000/AT1G32450/AT1G73500/AT1G76680/AT1G76980/AT2G18690/AT2G22300/AT2G30550/AT2G37750/AT2G44480/AT3G10985/AT3G14060/AT3G25010/AT3G25882/AT3G52430/AT3G54680/AT4G01870/AT4G02380/AT4G10500/AT4G15610/AT4G23810/AT4G24590/AT4G32940/AT4G36040/AT5G03280/AT5G25930/AT5G44610/AT5G52310/AT5G56870/AT5G62165/AT5G63130
GO:0010150	leaf senescence	583	AT3G54810	BME3,BME3-ZF,GATA8	NOVEL	32/1669	198/30167	4.81e-08	1.33e-06	32	AT1G02390/AT1G11190/AT1G30700/AT1G32450/AT1G54570/AT1G73500/AT1G76680/AT2G22300/AT2G25460/AT2G31570/AT2G34610/AT2G37750/AT2G39200/AT2G44300/AT2G46950/AT3G10500/AT3G11340/AT3G25882/AT3G56400/AT4G01870/AT4G02380/AT4G10500/AT4G15610/AT4G23810/AT4G32940/AT5G24530/AT5G25930/AT5G44160/AT5G44610/AT5G52310/AT5G59220/AT5G63130
GO:0010150	leaf senescence	584	AT1G78600	BBX22,DBB3,LZF1,STH3	NOVEL	33/1675	198/30167	1.5e-08	5.76e-07	33	AT1G02390/AT1G21000/AT1G30700/AT1G32450/AT1G54130/AT1G54570/AT1G73500/AT1G76680/AT2G18690/AT2G25460/AT2G30550/AT2G37750/AT2G46950/AT3G11340/AT3G25882/AT3G29035/AT3G56400/AT4G01870/AT4G02380/AT4G10500/AT4G15610/AT4G23810/AT4G32940/AT4G36040/AT5G24530/AT5G25930/AT5G37600/AT5G44160/AT5G44610/AT5G52310/AT5G56870/AT5G59220/AT5G64940
GO:0010150	leaf senescence	585	AT3G16870	GATA17	NOVEL	21/1670	198/30167	0.00333282	0.0306227	21	AT1G02390/AT1G20900/AT1G30700/AT1G32450/AT1G76680/AT2G25460/AT2G31570/AT2G34610/AT2G37750/AT2G44300/AT2G46950/AT3G11340/AT3G60670/AT4G01870/AT4G02380/AT4G10500/AT4G15610/AT4G32940/AT5G24530/AT5G52310/AT5G59220
GO:0010150	leaf senescence	586	AT5G03415	ATDPB,DPB	NOVEL	31/1674	198/30167	1.73e-07	6.36e-06	31	AT1G01680/AT1G02390/AT1G30700/AT1G31040/AT1G32450/AT1G36622/AT1G54130/AT1G54570/AT1G69490/AT1G76680/AT2G13810/AT2G22300/AT2G25460/AT2G44300/AT2G46950/AT3G05400/AT3G11340/AT3G25010/AT3G25882/AT4G01870/AT4G02380/AT4G10500/AT4G15610/AT4G32940/AT5G24110/AT5G24530/AT5G25930/AT5G37600/AT5G44610/AT5G52310/AT5G62165
GO:0010150	leaf senescence	587	AT5G62020	AT-HSFB2A,HSFB2A	NOVEL	33/1672	198/30167	1.44e-08	4.06e-07	33	AT1G02390/AT1G11190/AT1G21000/AT1G30700/AT1G32450/AT1G54570/AT1G73500/AT1G76680/AT1G76980/AT2G18690/AT2G22300/AT2G25460/AT2G31570/AT2G44300/AT2G46950/AT3G11340/AT3G25882/AT3G52430/AT3G56400/AT4G01870/AT4G02380/AT4G15610/AT4G23810/AT4G30490/AT4G32940/AT5G24530/AT5G25930/AT5G37600/AT5G44610/AT5G52310/AT5G59220/AT5G63130/AT5G64940
GO:0010150	leaf senescence	588	AT5G58900	DIV1	NOVEL	22/1662	198/30167	0.00141626	0.0111973	22	AT1G02390/AT1G30700/AT1G32450/AT1G54570/AT1G76680/AT1G76980/AT2G31570/AT2G34610/AT2G37750/AT2G44300/AT2G46950/AT3G11340/AT4G01870/AT4G02380/AT4G10500/AT4G15610/AT4G23810/AT4G32940/AT5G24530/AT5G25930/AT5G44610/AT5G52310
GO:0010150	leaf senescence	589	AT1G13960	WRKY4	NOVEL	31/1666	198/30167	1.55e-07	4.52e-06	31	AT1G02390/AT1G11190/AT1G30700/AT1G32450/AT1G54570/AT1G76680/AT2G18690/AT2G25460/AT2G37750/AT2G39200/AT2G44300/AT2G46950/AT3G05400/AT3G25882/AT3G56400/AT4G01870/AT4G02380/AT4G10500/AT4G15610/AT4G18980/AT4G23810/AT4G32940/AT4G36040/AT5G24530/AT5G25930/AT5G37600/AT5G39050/AT5G44610/AT5G52310/AT5G62165/AT5G64940
GO:0010150	leaf senescence	590	AT3G55370	OBP3	NOVEL	22/1653	198/30167	0.00132234	0.0173888	22	AT1G20900/AT1G30700/AT1G32450/AT1G54570/AT1G69490/AT1G73220/AT1G76680/AT2G25460/AT2G34610/AT2G44300/AT2G46950/AT3G05400/AT3G11340/AT4G01870/AT4G02380/AT4G15610/AT4G32940/AT5G25930/AT5G44160/AT5G44610/AT5G52310/AT5G59220
GO:0010150	leaf senescence	591	AT1G18330	EPR1,RVE7	NOVEL	30/1659	198/30167	4.62e-07	1.74e-05	30	AT1G02390/AT1G11190/AT1G21000/AT1G32450/AT1G69490/AT1G73500/AT1G76680/AT2G25460/AT2G31570/AT2G34610/AT2G37750/AT2G44300/AT2G46950/AT3G07350/AT3G11340/AT3G25882/AT3G56400/AT4G01870/AT4G02380/AT4G10500/AT4G15610/AT4G23810/AT4G32940/AT4G36040/AT5G24110/AT5G24530/AT5G25930/AT5G37600/AT5G52310/AT5G62165
GO:0010150	leaf senescence	592	AT3G24490	AT3G24490	NOVEL	27/1650	198/30167	1.16e-05	0.000280577	27	AT1G02390/AT1G30700/AT1G31040/AT1G32450/AT1G54570/AT1G69490/AT1G76680/AT2G13810/AT2G22300/AT2G25460/AT2G44300/AT2G46950/AT3G05400/AT3G11340/AT3G25882/AT4G01870/AT4G10500/AT4G15610/AT4G32940/AT5G24110/AT5G24530/AT5G25930/AT5G37600/AT5G44610/AT5G52310/AT5G62000/AT5G62165
GO:0010150	leaf senescence	593	AT5G51980	AT5G51980	NOVEL	27/1654	198/30167	1.21e-05	0.000180906	27	AT1G01680/AT1G02390/AT1G30700/AT1G32450/AT1G54570/AT1G69490/AT1G76680/AT1G76980/AT2G25460/AT2G31570/AT2G37750/AT2G44300/AT2G46950/AT3G11340/AT4G01870/AT4G02380/AT4G10500/AT4G15610/AT4G30490/AT4G32940/AT4G36040/AT5G24530/AT5G25930/AT5G37600/AT5G44610/AT5G52310/AT5G63130
GO:0010150	leaf senescence	594	AT5G60120	TOE2	NOVEL	22/1635	198/30167	0.00115047	0.0127753	22	AT1G02390/AT1G20900/AT1G30700/AT1G32450/AT1G69490/AT1G73220/AT1G76680/AT2G34610/AT2G44300/AT2G46950/AT3G05400/AT3G11340/AT3G60670/AT4G01870/AT4G02380/AT4G15610/AT4G36040/AT5G24530/AT5G44160/AT5G44610/AT5G52310/AT5G62165
GO:0010150	leaf senescence	595	AT1G01350	AT1G01350	NOVEL	27/1649	198/30167	1.14e-05	0.000246817	27	AT1G01680/AT1G02390/AT1G11190/AT1G30700/AT1G32450/AT1G54570/AT1G76680/AT2G13810/AT2G18690/AT2G22300/AT2G31570/AT2G44300/AT2G46950/AT3G05400/AT3G25882/AT4G01870/AT4G02380/AT4G10500/AT4G15610/AT4G32940/AT5G24110/AT5G24530/AT5G25930/AT5G37600/AT5G44610/AT5G52310/AT5G62165
GO:0010150	leaf senescence	596	AT1G13260	AtRAV1,EDF4,RAV1	NOVEL	37/1653	198/30167	4.99e-11	2.61e-09	37	AT1G01680/AT1G02390/AT1G11190/AT1G30700/AT1G32450/AT1G36622/AT1G69490/AT1G73500/AT2G18690/AT2G25460/AT2G30550/AT2G43000/AT2G46950/AT3G14060/AT3G25010/AT3G25882/AT3G26210/AT3G48080/AT3G52430/AT3G56400/AT4G01870/AT4G02380/AT4G10500/AT4G12735/AT4G14365/AT4G15610/AT4G23810/AT4G32940/AT5G24110/AT5G24530/AT5G25930/AT5G37600/AT5G44610/AT5G52310/AT5G59220/AT5G62165/AT5G64940
GO:0010150	leaf senescence	597	AT5G45420	maMYB	NOVEL	27/1646	198/30167	1.11e-05	0.000292041	27	AT1G01680/AT1G02390/AT1G30700/AT1G32450/AT1G54570/AT1G69490/AT1G76680/AT2G13810/AT2G22300/AT2G35980/AT2G44300/AT2G46950/AT3G05400/AT3G11340/AT3G25882/AT4G01870/AT4G02380/AT4G10500/AT4G15610/AT4G32940/AT5G24110/AT5G24530/AT5G25930/AT5G37600/AT5G44610/AT5G52310/AT5G62165
GO:0010150	leaf senescence	598	AT2G29065	AT2G29065	NOVEL	38/1643	198/30167	9.98e-12	5.5e-10	38	AT1G02390/AT1G08050/AT1G11190/AT1G30700/AT1G32450/AT1G36622/AT1G73500/AT1G76680/AT2G13810/AT2G18690/AT2G25460/AT2G31570/AT2G37750/AT2G39200/AT2G43000/AT2G44300/AT2G44480/AT2G46950/AT3G22910/AT3G25010/AT3G25882/AT3G29035/AT3G60670/AT4G01870/AT4G02380/AT4G10500/AT4G12735/AT4G15610/AT4G18980/AT4G23810/AT4G32940/AT5G24530/AT5G25930/AT5G37600/AT5G44610/AT5G52300/AT5G52310/AT5G63130
GO:0010150	leaf senescence	599	AT2G01060	AT2G01060	NOVEL	28/1641	198/30167	3.57e-06	9.93e-05	28	AT1G02390/AT1G30700/AT1G31040/AT1G32450/AT1G54570/AT1G69490/AT1G76680/AT2G13810/AT2G18690/AT2G25460/AT2G46950/AT3G05400/AT3G11340/AT3G25882/AT4G01870/AT4G02380/AT4G10500/AT4G15610/AT4G23810/AT4G32940/AT4G36040/AT5G24530/AT5G25930/AT5G37600/AT5G44610/AT5G52310/AT5G62165/AT5G64940
GO:0010150	leaf senescence	600	AT5G63280	AT5G63280	NOVEL	28/1644	198/30167	3.69e-06	9.67e-05	28	AT1G02390/AT1G30700/AT1G32450/AT1G54570/AT1G69490/AT1G76680/AT2G13810/AT2G31570/AT2G39200/AT2G44300/AT2G46950/AT3G05400/AT3G25882/AT3G29035/AT4G01250/AT4G01870/AT4G02380/AT4G10500/AT4G15610/AT4G32940/AT4G36040/AT5G24110/AT5G24530/AT5G25930/AT5G37600/AT5G44610/AT5G52310/AT5G62165
GO:0010150	leaf senescence	601	AT1G17460	TRFL3	NOVEL	26/1627	198/30167	2.55e-05	0.000635078	26	AT1G01680/AT1G02390/AT1G18210/AT1G32450/AT1G73220/AT1G73500/AT1G76680/AT2G25460/AT2G34610/AT2G42540/AT2G44300/AT2G44480/AT2G46950/AT3G05400/AT3G11340/AT3G25010/AT3G50760/AT4G01870/AT4G02380/AT4G10500/AT4G15610/AT4G18980/AT4G32940/AT5G44160/AT5G52310/AT5G62165
GO:0010150	leaf senescence	602	AT2G40750	ATWRKY54,WRKY54	NOVEL	37/1632	198/30167	3.47e-11	1.62e-09	37	AT1G01680/AT1G02390/AT1G30700/AT1G32450/AT1G36622/AT1G54040/AT1G66830/AT1G66880/AT1G73500/AT1G76680/AT2G13810/AT2G18690/AT2G25460/AT2G25625/AT2G30550/AT2G43000/AT2G44300/AT3G22910/AT3G25010/AT3G25882/AT3G26210/AT3G56400/AT4G01250/AT4G01870/AT4G02380/AT4G15610/AT4G18980/AT4G23810/AT4G32940/AT4G36040/AT5G24110/AT5G24530/AT5G25930/AT5G37600/AT5G52310/AT5G62165/AT5G63130
GO:0010150	leaf senescence	603	AT5G62610	AT5G62610	NOVEL	24/1634	198/30167	0.000193521	0.00284327	24	AT1G01680/AT1G02390/AT1G32450/AT1G54570/AT1G69490/AT2G13810/AT2G25460/AT2G31570/AT2G35980/AT2G44300/AT2G46950/AT3G11340/AT3G25882/AT4G01870/AT4G02380/AT4G10500/AT4G15610/AT4G32940/AT5G24530/AT5G25930/AT5G37600/AT5G44610/AT5G52310/AT5G62165
GO:0010150	leaf senescence	604	AT1G28370	ATERF11,ERF11	NOVEL	35/1638	198/30167	6.22e-10	2.45e-08	35	AT1G01680/AT1G02390/AT1G21000/AT1G32450/AT1G66830/AT1G66880/AT1G73500/AT1G76680/AT2G13810/AT2G18690/AT2G22300/AT2G25460/AT2G25625/AT2G43000/AT2G46950/AT3G22910/AT3G25882/AT3G56400/AT4G02380/AT4G10500/AT4G14365/AT4G15610/AT4G23810/AT4G32940/AT4G36040/AT5G24110/AT5G24530/AT5G25930/AT5G37600/AT5G51720/AT5G52310/AT5G59220/AT5G62000/AT5G62165/AT5G63130
GO:0010150	leaf senescence	605	AT4G16150	CAMTA5	NOVEL	26/1625	198/30167	2.5e-05	0.000392989	26	AT1G02390/AT1G30700/AT1G32450/AT1G36622/AT1G54570/AT1G76680/AT2G13810/AT2G25460/AT2G39200/AT2G44300/AT2G46950/AT3G05400/AT3G25882/AT4G01870/AT4G02380/AT4G10500/AT4G15610/AT4G32940/AT4G36040/AT5G03280/AT5G24530/AT5G25930/AT5G37600/AT5G44610/AT5G52310/AT5G62165
GO:0010150	leaf senescence	606	AT5G02840	LCL1,RVE4	NOVEL	36/1628	198/30167	1.33e-10	5.56e-09	36	AT1G02390/AT1G11190/AT1G21000/AT1G30700/AT1G32450/AT1G54130/AT1G54570/AT1G64140/AT1G69490/AT1G73500/AT1G76680/AT2G18690/AT2G25460/AT2G31570/AT2G37750/AT2G44300/AT2G46950/AT3G05400/AT3G11340/AT3G14067/AT3G25882/AT3G52430/AT3G56400/AT4G01870/AT4G02380/AT4G10500/AT4G15610/AT4G23810/AT4G32940/AT5G24530/AT5G25930/AT5G37600/AT5G44610/AT5G52310/AT5G62000/AT5G62165
GO:0010150	leaf senescence	607	AT1G49560	HHO6	NOVEL	24/1609	198/30167	0.00015381	0.00235594	24	AT1G02390/AT1G11190/AT1G30700/AT1G32450/AT1G54570/AT1G73220/AT1G73500/AT1G76680/AT2G34610/AT2G44300/AT2G46950/AT3G60670/AT4G01870/AT4G02380/AT4G15610/AT4G23810/AT4G32940/AT4G36040/AT5G24530/AT5G25930/AT5G37600/AT5G44610/AT5G52310/AT5G59220
GO:0010150	leaf senescence	608	AT1G69310	ATWRKY57,WRKY57	NOVEL	29/1612	198/30167	8.17e-07	2.57e-05	29	AT1G01680/AT1G02390/AT1G18210/AT1G20900/AT1G30700/AT1G32450/AT1G76680/AT2G25460/AT2G31570/AT2G34610/AT2G35980/AT2G39200/AT2G43000/AT2G46950/AT3G14060/AT3G25010/AT4G01870/AT4G02380/AT4G10500/AT4G12735/AT4G15610/AT4G32940/AT4G36040/AT5G24110/AT5G25930/AT5G44160/AT5G52310/AT5G62165/AT5G63130
GO:0010150	leaf senescence	609	AT5G06770	KHZ2	NOVEL	28/1618	198/30167	2.73e-06	8.03e-05	28	AT1G01680/AT1G02390/AT1G30700/AT1G32450/AT1G54130/AT1G54570/AT1G69490/AT1G76680/AT2G13810/AT2G22300/AT2G31570/AT2G39200/AT2G44300/AT2G46950/AT3G05400/AT3G11340/AT4G01870/AT4G10500/AT4G15610/AT4G32940/AT5G24530/AT5G25930/AT5G37600/AT5G44610/AT5G52310/AT5G56870/AT5G62000/AT5G62165
GO:0010150	leaf senescence	610	AT5G09330	ANAC082,NAC082,VNI1	NOVEL	29/1619	198/30167	8.91e-07	3.23e-05	29	AT1G01680/AT1G02390/AT1G30700/AT1G31040/AT1G32450/AT1G54570/AT1G69490/AT1G76680/AT2G13810/AT2G25460/AT2G35980/AT2G44300/AT2G44480/AT2G46950/AT3G05400/AT3G11340/AT3G25010/AT3G25882/AT4G01870/AT4G02380/AT4G10500/AT4G15610/AT4G32940/AT5G24530/AT5G25930/AT5G37600/AT5G44610/AT5G52310/AT5G62165
GO:0010150	leaf senescence	611	AT1G58110	AT1G58110	NOVEL	34/1615	198/30167	1.66e-09	5.33e-08	34	AT1G01680/AT1G02390/AT1G08050/AT1G11190/AT1G30700/AT1G32450/AT1G54130/AT1G54570/AT1G64140/AT1G69490/AT2G22300/AT2G25460/AT2G31570/AT2G39200/AT2G44300/AT2G46950/AT3G11340/AT3G25010/AT3G25882/AT4G01870/AT4G02380/AT4G10500/AT4G15610/AT4G32940/AT5G24110/AT5G24530/AT5G25930/AT5G44610/AT5G52300/AT5G52310/AT5G56870/AT5G59220/AT5G62165/AT5G63130
GO:0010150	leaf senescence	612	AT3G10480	ANAC050,NAC050,NAC50	NOVEL	30/1616	198/30167	2.66e-07	7.25e-06	30	AT1G02390/AT1G11190/AT1G30700/AT1G32450/AT1G54570/AT1G76680/AT2G13810/AT2G22300/AT2G25460/AT2G31570/AT2G35980/AT2G39200/AT2G44300/AT2G46950/AT3G05400/AT3G25882/AT4G01870/AT4G02380/AT4G10500/AT4G15610/AT4G23810/AT4G32940/AT4G36040/AT5G24530/AT5G25930/AT5G37600/AT5G44610/AT5G52310/AT5G62000/AT5G62165
GO:0010150	leaf senescence	613	AT3G10490	ANAC051,ANAC052,NAC052,SGS1	NOVEL	29/1611	198/30167	8.07e-07	1.93e-05	29	AT1G02390/AT1G11190/AT1G30700/AT1G32450/AT1G54570/AT1G69490/AT1G76680/AT2G18690/AT2G25460/AT2G31570/AT2G37750/AT2G39200/AT2G44300/AT2G46950/AT3G05400/AT3G25882/AT4G01870/AT4G02380/AT4G10500/AT4G15610/AT4G32940/AT4G36040/AT5G03280/AT5G24530/AT5G25930/AT5G44610/AT5G52310/AT5G62165/AT5G64940
GO:0010150	leaf senescence	614	AT3G53370	AT3G53370	NOVEL	21/1597	198/30167	0.00196967	0.0165611	21	AT1G02390/AT1G20900/AT1G30700/AT1G32450/AT1G76680/AT2G34610/AT2G44300/AT2G46950/AT3G05400/AT3G11340/AT3G60670/AT4G01870/AT4G02380/AT4G10500/AT4G15610/AT4G32940/AT5G24530/AT5G25930/AT5G44610/AT5G52310/AT5G59220
GO:0010150	leaf senescence	615	AT4G21610	LOL2	NOVEL	30/1610	198/30167	2.46e-07	7.31e-06	30	AT1G02390/AT1G30700/AT1G32450/AT1G69490/AT1G73500/AT1G76680/AT2G18690/AT2G25460/AT2G31570/AT2G35980/AT2G44300/AT2G46950/AT3G11340/AT3G25882/AT3G56400/AT4G01870/AT4G02380/AT4G10500/AT4G12735/AT4G15610/AT4G23810/AT4G32940/AT4G36040/AT5G24530/AT5G25930/AT5G37600/AT5G44610/AT5G52310/AT5G62165/AT5G63130
GO:0010150	leaf senescence	616	AT1G75080	BZR1	NOVEL	32/1619	198/30167	2.38e-08	6.81e-07	32	AT1G01680/AT1G02390/AT1G30700/AT1G32450/AT1G54130/AT1G54570/AT1G69490/AT1G76680/AT2G25460/AT2G31570/AT2G37750/AT2G39200/AT2G44300/AT2G46950/AT3G11340/AT3G25882/AT4G01870/AT4G02380/AT4G10500/AT4G15610/AT4G23810/AT4G30490/AT4G32940/AT4G36040/AT5G24530/AT5G25930/AT5G44160/AT5G44610/AT5G52310/AT5G59220/AT5G62165/AT5G63130
GO:0010150	leaf senescence	617	AT3G01970	ATWRKY45,WRKY45	NOVEL	21/1600	198/30167	0.00201441	0.0221088	21	AT1G01680/AT1G30700/AT1G32450/AT1G73500/AT1G76680/AT2G13810/AT2G25460/AT3G10985/AT3G11340/AT3G25882/AT4G01870/AT4G02380/AT4G15610/AT4G32940/AT4G36040/AT5G24530/AT5G25930/AT5G37600/AT5G44610/AT5G59220/AT5G62165
GO:0010150	leaf senescence	618	AT5G39610	ANAC092,ATNAC2,ATNAC6,NAC2,NAC6,ORE1	KNOWN	31/1598	198/30167	6.18e-08	3.68e-06	31	AT1G01680/AT1G21000/AT1G32450/AT1G54130/AT1G69490/AT1G73220/AT1G73500/AT1G76680/AT2G13810/AT2G22300/AT2G25460/AT2G34610/AT2G37750/AT2G44480/AT3G10985/AT3G14060/AT3G25882/AT3G29035/AT4G01870/AT4G02380/AT4G10500/AT4G12735/AT4G15610/AT4G23810/AT4G32940/AT4G36040/AT5G37600/AT5G44610/AT5G52310/AT5G56870/AT5G62165
GO:0010150	leaf senescence	619	AT5G46760	MYC3	NOVEL	35/1608	198/30167	3.82e-10	1.48e-08	35	AT1G02390/AT1G21000/AT1G30700/AT1G32450/AT1G54130/AT1G69490/AT1G73500/AT1G76980/AT2G18690/AT2G25460/AT2G30550/AT2G31570/AT2G35980/AT2G44300/AT2G46950/AT3G52430/AT3G56400/AT4G01870/AT4G02380/AT4G03550/AT4G10500/AT4G15610/AT4G23810/AT4G32940/AT4G36040/AT5G03280/AT5G24530/AT5G25930/AT5G37600/AT5G39050/AT5G44610/AT5G52310/AT5G62000/AT5G62165/AT5G63130
GO:0010150	leaf senescence	620	AT3G25990	AT3G25990	NOVEL	31/1600	198/30167	6.35e-08	3.34e-06	31	AT1G01680/AT1G02390/AT1G30700/AT1G32450/AT1G66830/AT1G66880/AT1G69490/AT1G73500/AT1G76680/AT2G13810/AT2G18690/AT2G22300/AT2G25625/AT2G42540/AT2G44480/AT3G25010/AT3G25882/AT4G01870/AT4G02380/AT4G10500/AT4G14365/AT4G15610/AT4G23810/AT4G32940/AT4G36040/AT5G24110/AT5G24530/AT5G25930/AT5G37600/AT5G52310/AT5G62165
GO:0010150	leaf senescence	621	AT4G01060	CPL3,ETC3	NOVEL	24/1597	198/30167	0.000137468	0.0025497	24	AT1G01680/AT1G02390/AT1G11190/AT1G21000/AT1G32450/AT1G73500/AT1G76680/AT2G44300/AT2G46950/AT3G10985/AT4G01870/AT4G02380/AT4G15610/AT4G23810/AT4G32940/AT4G36040/AT5G24110/AT5G24530/AT5G25930/AT5G37600/AT5G44160/AT5G52310/AT5G62000/AT5G63130
GO:0010150	leaf senescence	622	AT4G37180	HHO5,UIF1	NOVEL	31/1606	198/30167	6.91e-08	1.86e-06	31	AT1G02390/AT1G11190/AT1G30700/AT1G32450/AT1G54570/AT1G73500/AT1G76680/AT1G76980/AT2G18690/AT2G25460/AT2G31570/AT2G37750/AT2G39200/AT2G44300/AT2G46950/AT3G07350/AT3G56400/AT4G01870/AT4G02380/AT4G10500/AT4G15610/AT4G23810/AT4G32940/AT4G36040/AT5G24530/AT5G25930/AT5G44610/AT5G52310/AT5G59220/AT5G62165/AT5G63130
GO:0010150	leaf senescence	623	AT1G61730	AT1G61730	NOVEL	27/1597	198/30167	6.42e-06	0.000122948	27	AT1G02390/AT1G11190/AT1G30700/AT1G32450/AT1G54570/AT1G69490/AT1G76680/AT1G76980/AT2G25460/AT2G31570/AT2G37750/AT2G44300/AT2G46950/AT3G11340/AT4G01870/AT4G02380/AT4G10500/AT4G15610/AT4G23810/AT4G32940/AT5G24530/AT5G37600/AT5G44160/AT5G44610/AT5G52310/AT5G62165/AT5G63130
GO:0010150	leaf senescence	624	AT1G30970	SUF4	NOVEL	30/1596	198/30167	2.04e-07	6.38e-06	30	AT1G01680/AT1G02390/AT1G11190/AT1G31040/AT1G32450/AT1G54130/AT1G54570/AT1G76680/AT2G13810/AT2G25460/AT2G31570/AT2G39200/AT2G44300/AT2G44480/AT2G46950/AT3G05400/AT3G25882/AT4G01870/AT4G02380/AT4G10500/AT4G12735/AT4G15610/AT4G32940/AT5G24110/AT5G24530/AT5G25930/AT5G37600/AT5G44610/AT5G52310/AT5G62165
GO:0010150	leaf senescence	625	AT2G44430	AT2G44430	NOVEL	29/1600	198/30167	7.02e-07	1.52e-05	29	AT1G01680/AT1G02390/AT1G11190/AT1G30700/AT1G32450/AT1G54570/AT1G76680/AT2G18690/AT2G22300/AT2G25460/AT2G31570/AT2G37750/AT2G39200/AT2G44300/AT2G46950/AT3G10500/AT3G25882/AT4G01870/AT4G02380/AT4G10500/AT4G15610/AT4G23810/AT4G32940/AT4G36040/AT5G25930/AT5G44610/AT5G52310/AT5G62165/AT5G63130
GO:0010150	leaf senescence	626	AT5G47640	NF-YB2	NOVEL	35/1599	198/30167	3.29e-10	1.36e-08	35	AT1G01680/AT1G02390/AT1G11190/AT1G21000/AT1G30700/AT1G32450/AT1G36622/AT1G54130/AT1G54570/AT1G73500/AT2G22300/AT2G25460/AT2G25625/AT2G31570/AT2G39200/AT2G44300/AT2G44480/AT2G46950/AT3G07350/AT3G11340/AT3G22910/AT3G25882/AT3G56400/AT4G01870/AT4G02380/AT4G10500/AT4G23810/AT5G24110/AT5G24530/AT5G25930/AT5G44610/AT5G52310/AT5G59220/AT5G62000/AT5G62165
GO:0010150	leaf senescence	627	AT1G42990	ATBZIP60,BZIP60,BZIP60	NOVEL	38/1599	198/30167	4.46e-12	1.94e-10	38	AT1G02390/AT1G08050/AT1G11190/AT1G21000/AT1G30700/AT1G32450/AT1G54570/AT1G69490/AT1G73500/AT1G76680/AT1G76980/AT2G18690/AT2G25460/AT2G31570/AT2G37750/AT2G39200/AT2G44300/AT2G46950/AT3G11340/AT3G25882/AT3G52430/AT3G56400/AT4G01870/AT4G02380/AT4G10500/AT4G15610/AT4G23810/AT4G30490/AT4G32940/AT4G36040/AT5G24530/AT5G25930/AT5G37600/AT5G44610/AT5G52310/AT5G56870/AT5G59220/AT5G63130
GO:0010150	leaf senescence	628	AT2G46680	ATHB-7,ATHB7,HB-7	NOVEL	30/1580	198/30167	1.65e-07	8.94e-06	30	AT1G02390/AT1G21000/AT1G30700/AT1G32450/AT1G73500/AT1G76680/AT1G76980/AT2G18690/AT2G25460/AT2G25625/AT2G34610/AT2G35980/AT2G44480/AT2G46950/AT3G11340/AT3G22910/AT4G01870/AT4G02380/AT4G10500/AT4G12735/AT4G15610/AT4G32940/AT5G24530/AT5G25930/AT5G52300/AT5G52310/AT5G59220/AT5G62000/AT5G62165/AT5G63130
GO:0010150	leaf senescence	629	AT1G27660	AT1G27660	NOVEL	25/1583	198/30167	4.48e-05	0.000759304	25	AT1G02390/AT1G11190/AT1G30700/AT1G32450/AT1G54570/AT1G73500/AT1G76680/AT2G25460/AT2G31570/AT2G35980/AT2G37750/AT2G44300/AT2G46950/AT3G11340/AT3G56400/AT4G01870/AT4G02380/AT4G10500/AT4G15610/AT4G32940/AT5G24530/AT5G44160/AT5G51720/AT5G52310/AT5G63130
GO:0010150	leaf senescence	630	AT5G03720	AT-HSFA3,HSFA3	NOVEL	29/1566	198/30167	4.54e-07	2.25e-05	29	AT1G02390/AT1G11190/AT1G30700/AT1G32450/AT1G73500/AT1G76680/AT2G18690/AT2G25460/AT2G31570/AT2G34610/AT2G35980/AT2G44300/AT2G46950/AT3G05400/AT3G11340/AT3G56400/AT3G60670/AT4G01870/AT4G02380/AT4G10500/AT4G12735/AT4G15610/AT4G23810/AT4G32940/AT5G25930/AT5G37600/AT5G44610/AT5G52310/AT5G59220
GO:0010150	leaf senescence	631	AT5G45260	ATWRKY52,RRS1,RRS1-R,SLH1	NOVEL	24/1581	198/30167	0.000118092	0.00219832	24	AT1G02390/AT1G32450/AT1G36622/AT1G73220/AT1G76680/AT2G13810/AT2G31570/AT2G35980/AT2G39200/AT2G44300/AT3G05400/AT3G11340/AT3G25010/AT3G56400/AT4G02380/AT4G15610/AT4G23810/AT4G36040/AT5G24530/AT5G25930/AT5G37600/AT5G52310/AT5G56870/AT5G62165
GO:0010150	leaf senescence	632	AT5G16560	KAN,KAN1	NOVEL	28/1580	198/30167	1.73e-06	5.25e-05	28	AT1G02390/AT1G11190/AT1G20900/AT1G30700/AT1G31040/AT1G32450/AT1G69490/AT1G76680/AT2G18690/AT2G25460/AT2G34610/AT2G37750/AT2G44300/AT2G46950/AT3G25010/AT3G25882/AT4G01870/AT4G02380/AT4G10500/AT4G12735/AT4G15610/AT4G32940/AT5G25930/AT5G44610/AT5G52310/AT5G56870/AT5G62165/AT5G63130
GO:0010150	leaf senescence	633	AT1G49720	ABF1,AtABF1	NOVEL	26/1571	198/30167	1.4e-05	0.000279835	26	AT1G02390/AT1G30700/AT1G32450/AT1G54130/AT1G54570/AT1G73500/AT1G76680/AT2G22300/AT2G25460/AT2G34610/AT2G37750/AT2G44300/AT2G46950/AT3G56400/AT4G01870/AT4G02380/AT4G15610/AT4G23810/AT4G32940/AT4G36040/AT5G24530/AT5G25930/AT5G37600/AT5G44610/AT5G52310/AT5G62165
GO:0010150	leaf senescence	634	AT1G19510	ATRL5,RL5,RSM4	NOVEL	34/1572	198/30167	8.33e-10	5.67e-08	34	AT1G01680/AT1G13990/AT1G21000/AT1G30700/AT1G32450/AT1G54130/AT1G66880/AT1G73500/AT1G76680/AT2G13800/AT2G13810/AT2G18690/AT2G22300/AT2G30550/AT3G14067/AT3G25010/AT3G25882/AT3G56400/AT4G01250/AT4G14365/AT4G14370/AT4G18980/AT4G23810/AT4G32940/AT4G36040/AT5G24110/AT5G24530/AT5G25930/AT5G37600/AT5G51720/AT5G52310/AT5G62000/AT5G62165/AT5G63130
GO:0010150	leaf senescence	635	AT1G19490	AT1G19490	NOVEL	24/1564	198/30167	0.000100212	0.00187171	24	AT1G02390/AT1G11190/AT1G30700/AT1G32450/AT1G73500/AT1G76680/AT2G22300/AT2G25460/AT2G31570/AT2G39730/AT2G44300/AT2G46950/AT3G60670/AT4G01870/AT4G10500/AT4G12735/AT4G32940/AT5G24530/AT5G25930/AT5G52300/AT5G52310/AT5G59220/AT5G62165/AT5G63130
GO:0010150	leaf senescence	636	AT3G23210	bHLH34	NOVEL	25/1558	198/30167	3.46e-05	0.000637193	25	AT1G02390/AT1G11190/AT1G30700/AT1G31040/AT1G32450/AT1G54570/AT1G73220/AT1G73500/AT2G25460/AT2G31570/AT2G37750/AT2G44300/AT2G46950/AT3G05400/AT3G11340/AT4G01870/AT4G32940/AT5G24530/AT5G25930/AT5G37600/AT5G44610/AT5G52310/AT5G59220/AT5G62165/AT5G64940
GO:0010150	leaf senescence	637	AT1G73730	AT1G73730	NOVEL	24/1561	198/30167	9.73e-05	0.00154304	24	AT1G02390/AT1G11190/AT1G30700/AT1G32450/AT1G54130/AT1G54570/AT1G76680/AT2G13810/AT2G22300/AT2G35980/AT2G46950/AT3G05400/AT3G25882/AT4G01870/AT4G02380/AT4G10500/AT4G15610/AT4G32940/AT5G24530/AT5G25930/AT5G37600/AT5G44610/AT5G52310/AT5G62165
GO:0010150	leaf senescence	638	AT1G25550	HHO3,NIGT1.1	NOVEL	28/1570	198/30167	1.53e-06	3e-05	28	AT1G02390/AT1G08050/AT1G11190/AT1G30700/AT1G32450/AT1G54570/AT1G73500/AT2G25460/AT2G30550/AT2G31570/AT2G37750/AT2G44300/AT2G46950/AT3G11340/AT3G25882/AT4G01870/AT4G02380/AT4G10500/AT4G15610/AT4G23810/AT4G32940/AT5G24530/AT5G25930/AT5G39050/AT5G44610/AT5G52310/AT5G59220/AT5G63130
GO:0010150	leaf senescence	639	AT1G43700	AtVIP1,SUE3,VIP1	NOVEL	33/1565	198/30167	2.88e-09	9.44e-08	33	AT1G02390/AT1G13990/AT1G21000/AT1G32450/AT1G54130/AT1G54570/AT1G69490/AT1G73500/AT1G76680/AT2G02710/AT2G18690/AT2G25460/AT2G31570/AT2G37750/AT2G44300/AT2G46950/AT3G25882/AT3G52430/AT3G56400/AT4G01870/AT4G02380/AT4G10500/AT4G15610/AT4G23810/AT4G32940/AT4G36040/AT5G24530/AT5G25930/AT5G37600/AT5G44610/AT5G52310/AT5G62165/AT5G64940
GO:0010150	leaf senescence	640	AT1G71260	ATWHY2,WHY2	NOVEL	20/1565	198/30167	0.00347587	0.0304318	20	AT1G02390/AT1G30700/AT1G32450/AT1G76680/AT1G76980/AT2G34610/AT2G37750/AT2G44300/AT2G46950/AT3G11340/AT3G60670/AT4G01870/AT4G02380/AT4G10500/AT4G15610/AT4G32940/AT5G24530/AT5G37600/AT5G52310/AT5G62165
GO:0010150	leaf senescence	641	AT3G60630	ATHAM2,HAM2,LOM2	NOVEL	21/1562	198/30167	0.00150708	0.0125757	21	AT1G02390/AT1G32450/AT1G54130/AT1G54570/AT1G76680/AT2G31570/AT2G44300/AT2G46950/AT3G11340/AT3G25882/AT4G01870/AT4G02380/AT4G10500/AT4G15610/AT4G32940/AT5G24530/AT5G25930/AT5G37600/AT5G44610/AT5G52310/AT5G62165
GO:0010150	leaf senescence	642	AT1G45249	ABF2,AREB1,AtABF2,ATAREB1	NOVEL	29/1569	198/30167	4.72e-07	1.13e-05	29	AT1G02390/AT1G11190/AT1G21000/AT1G32450/AT1G54570/AT1G73500/AT1G76680/AT2G25460/AT2G25625/AT2G30550/AT2G31570/AT2G37750/AT2G44300/AT2G46950/AT3G11340/AT3G56400/AT4G01870/AT4G02380/AT4G15610/AT4G23810/AT4G36040/AT5G24530/AT5G25930/AT5G37600/AT5G44610/AT5G52310/AT5G59220/AT5G62165/AT5G63130
GO:0010150	leaf senescence	643	AT3G14180	ASIL2	NOVEL	24/1559	198/30167	9.54e-05	0.00117182	24	AT1G02390/AT1G11190/AT1G30700/AT1G32450/AT1G54570/AT1G69490/AT1G76680/AT2G25460/AT2G39200/AT2G44300/AT2G46950/AT3G11340/AT3G25882/AT4G01870/AT4G02380/AT4G10500/AT4G15610/AT4G32940/AT5G24530/AT5G25930/AT5G37600/AT5G44610/AT5G52310/AT5G62165
GO:0010150	leaf senescence	644	AT3G46070	AT3G46070	NOVEL	20/1542	198/30167	0.00294373	0.0411011	20	AT1G01680/AT1G02390/AT1G76680/AT2G25460/AT2G31570/AT2G37750/AT2G39200/AT2G43000/AT3G07350/AT3G10985/AT3G25010/AT4G01250/AT4G01870/AT4G02380/AT4G10500/AT4G36040/AT5G24110/AT5G24530/AT5G25930/AT5G52310
GO:0010150	leaf senescence	645	AT4G40060	ATHB-16,ATHB16,HB16	NOVEL	31/1555	198/30167	3.35e-08	1.08e-06	31	AT1G01680/AT1G02390/AT1G11190/AT1G30700/AT1G32450/AT1G54570/AT1G73500/AT1G76680/AT2G22300/AT2G25460/AT2G31570/AT2G37750/AT2G39200/AT2G44300/AT2G44480/AT2G46950/AT3G11340/AT3G14060/AT3G25882/AT4G01870/AT4G10500/AT4G15610/AT4G32940/AT5G03280/AT5G24530/AT5G25930/AT5G37600/AT5G44610/AT5G52310/AT5G62000/AT5G62165
GO:0010150	leaf senescence	646	AT1G13450	GT-1	NOVEL	32/1556	198/30167	9.37e-09	3.15e-07	32	AT1G02390/AT1G11190/AT1G30700/AT1G32450/AT1G54570/AT1G69490/AT1G73500/AT1G76680/AT2G25460/AT2G37750/AT2G39200/AT2G44300/AT2G46950/AT3G25882/AT3G52430/AT3G56400/AT4G01870/AT4G02380/AT4G10500/AT4G15610/AT4G23810/AT4G30490/AT4G32940/AT4G36040/AT5G24530/AT5G25930/AT5G37600/AT5G44610/AT5G52310/AT5G56870/AT5G62165/AT5G64940
GO:0010150	leaf senescence	647	AT4G01120	ATBZIP54,GBF2	NOVEL	28/1558	198/30167	1.32e-06	2.69e-05	28	AT1G02390/AT1G11190/AT1G21000/AT1G30700/AT1G32450/AT1G54570/AT1G73500/AT1G76680/AT2G25460/AT2G31570/AT2G37750/AT2G44300/AT2G46950/AT3G07350/AT3G11340/AT3G56400/AT4G01870/AT4G02380/AT4G15610/AT4G32940/AT4G36040/AT5G24530/AT5G44160/AT5G44610/AT5G52310/AT5G59220/AT5G62165/AT5G64940
GO:0010150	leaf senescence	648	AT4G31920	ARR10,RR10	NOVEL	33/1556	198/30167	2.49e-09	7.26e-08	33	AT1G02390/AT1G08050/AT1G11190/AT1G30700/AT1G32450/AT1G54570/AT1G73500/AT1G76680/AT1G76980/AT2G25460/AT2G31570/AT2G37750/AT2G39200/AT2G44300/AT2G44480/AT2G46950/AT3G25882/AT3G56400/AT4G01870/AT4G02380/AT4G10500/AT4G15610/AT4G23810/AT4G30490/AT4G32940/AT4G36040/AT5G03280/AT5G24530/AT5G25930/AT5G44610/AT5G52310/AT5G62165/AT5G63130
GO:0010150	leaf senescence	649	AT1G06070	bZIP69	NOVEL	28/1542	198/30167	1.08e-06	3e-05	28	AT1G02390/AT1G11190/AT1G30700/AT1G31040/AT1G32450/AT1G54570/AT1G76680/AT2G13810/AT2G31570/AT2G35980/AT2G39200/AT2G44300/AT2G46950/AT3G11340/AT3G25882/AT4G01870/AT4G02380/AT4G10500/AT4G15610/AT4G32940/AT4G36040/AT5G24110/AT5G24530/AT5G25930/AT5G37600/AT5G44610/AT5G52310/AT5G62165
GO:0010150	leaf senescence	650	AT1G77920	TGA7	NOVEL	33/1536	198/30167	1.81e-09	7.53e-08	33	AT1G02390/AT1G30700/AT1G32450/AT1G76680/AT2G18690/AT2G25460/AT2G25625/AT2G30550/AT2G31570/AT2G34610/AT2G35980/AT2G39200/AT2G43000/AT2G44300/AT2G46950/AT3G05400/AT3G10500/AT3G14060/AT4G01870/AT4G02380/AT4G10500/AT4G12735/AT4G15610/AT4G23810/AT4G32940/AT4G36040/AT5G25930/AT5G37600/AT5G44160/AT5G44610/AT5G52310/AT5G62165/AT5G63130
GO:0010150	leaf senescence	651	AT3G12680	AT3G12680	NOVEL	25/1534	198/30167	2.69e-05	0.000539293	25	AT1G01680/AT1G02390/AT1G30700/AT1G32450/AT1G54130/AT1G54570/AT1G76680/AT2G13810/AT2G22300/AT2G35980/AT2G39200/AT2G44300/AT2G46950/AT3G05400/AT3G25882/AT4G10500/AT4G15610/AT4G32940/AT4G36040/AT5G24530/AT5G25930/AT5G37600/AT5G44610/AT5G52310/AT5G62165
GO:0010150	leaf senescence	652	AT1G25560	AtTEM1,EDF1,TEM1	NOVEL	44/1549	198/30167	1.1e-16	8.35e-15	44	AT1G01680/AT1G02390/AT1G11190/AT1G21000/AT1G30700/AT1G32450/AT1G54130/AT1G54570/AT1G66880/AT1G69490/AT1G73500/AT1G76680/AT2G18690/AT2G22300/AT2G25460/AT2G25625/AT2G30550/AT2G37750/AT2G43000/AT2G44300/AT2G44480/AT2G46950/AT3G25882/AT3G26210/AT3G52430/AT3G56400/AT4G01250/AT4G01870/AT4G02380/AT4G10500/AT4G14365/AT4G15610/AT4G23810/AT4G32940/AT5G24110/AT5G24530/AT5G25930/AT5G37600/AT5G44610/AT5G52310…
GO:0010150	leaf senescence	653	AT5G45710	AT-HSFA4C,HSFA4C,RHA1	NOVEL	33/1545	198/30167	2.09e-09	7.51e-08	33	AT1G02390/AT1G11190/AT1G30700/AT1G32450/AT1G54130/AT1G54570/AT1G69490/AT1G73500/AT1G76680/AT1G76980/AT2G25460/AT2G31570/AT2G37750/AT2G39200/AT2G44300/AT2G46950/AT3G07350/AT3G11340/AT4G01870/AT4G02380/AT4G10500/AT4G15610/AT4G23810/AT4G30490/AT4G32940/AT4G36040/AT5G24530/AT5G25930/AT5G37600/AT5G44610/AT5G52310/AT5G62165/AT5G63130
GO:0010150	leaf senescence	654	AT1G76870	AT1G76870	NOVEL	23/1516	198/30167	0.00016653	0.00356652	23	AT1G02390/AT1G30700/AT1G32450/AT1G76680/AT2G13810/AT2G25460/AT2G34610/AT2G44300/AT2G44480/AT2G46950/AT3G05400/AT3G11340/AT3G22910/AT3G56400/AT3G60670/AT4G01870/AT4G02380/AT5G03280/AT5G24530/AT5G25930/AT5G44610/AT5G52300/AT5G52310
GO:0010150	leaf senescence	655	AT5G09410	CAMTA1,EICBP.B	NOVEL	26/1533	198/30167	9.17e-06	0.000219132	26	AT1G01680/AT1G02390/AT1G30700/AT1G32450/AT1G54570/AT1G76680/AT2G13810/AT2G22300/AT2G44300/AT2G46950/AT3G05400/AT3G11340/AT3G25882/AT3G60670/AT4G01870/AT4G10500/AT4G15610/AT4G32940/AT5G03280/AT5G24530/AT5G25930/AT5G37600/AT5G44610/AT5G52310/AT5G62000/AT5G62165
GO:0010150	leaf senescence	656	AT4G17230	SCL13	NOVEL	38/1537	198/30167	1.37e-12	5.76e-11	38	AT1G02390/AT1G08050/AT1G11190/AT1G30700/AT1G32450/AT1G54570/AT1G66880/AT1G73500/AT1G76680/AT2G18690/AT2G22300/AT2G25460/AT2G25625/AT2G30550/AT2G31570/AT2G39200/AT2G44300/AT2G44480/AT2G46950/AT3G22910/AT3G25882/AT3G52430/AT3G56400/AT4G01870/AT4G02380/AT4G10500/AT4G12735/AT4G14365/AT4G14370/AT4G15610/AT4G23810/AT4G32940/AT5G24530/AT5G25930/AT5G44610/AT5G52310/AT5G62165/AT5G63130
GO:0010150	leaf senescence	657	AT3G60530	GATA4	NOVEL	24/1538	198/30167	7.75e-05	0.00132132	24	AT1G01680/AT1G02390/AT1G30700/AT1G32450/AT1G76680/AT2G18690/AT2G25460/AT2G37750/AT2G44300/AT2G46950/AT3G11340/AT3G25010/AT3G25882/AT4G01870/AT4G02380/AT4G15610/AT4G32940/AT4G36040/AT5G03280/AT5G24530/AT5G25930/AT5G44610/AT5G52310/AT5G62165
GO:0010150	leaf senescence	658	AT2G33835	AT2G33835	NOVEL	24/1529	198/30167	7.08e-05	0.00104665	24	AT1G01680/AT1G02390/AT1G11190/AT1G30700/AT1G32450/AT1G54570/AT1G76680/AT2G13810/AT2G44300/AT2G44480/AT2G46950/AT3G11340/AT3G25882/AT4G01870/AT4G10500/AT4G15610/AT4G32940/AT5G24110/AT5G24530/AT5G25930/AT5G37600/AT5G44610/AT5G52310/AT5G62165
GO:0010150	leaf senescence	659	AT5G11270	OCP3	NOVEL	24/1530	198/30167	7.15e-05	0.00120972	24	AT1G01680/AT1G02390/AT1G30700/AT1G32450/AT1G54130/AT1G54570/AT1G69490/AT1G76680/AT2G13810/AT2G44300/AT2G46950/AT3G05400/AT3G11340/AT3G43230/AT4G01870/AT4G02380/AT4G15610/AT4G32940/AT5G24530/AT5G25930/AT5G37600/AT5G44610/AT5G52310/AT5G62165
GO:0010150	leaf senescence	660	AT3G19290	ABF4,AREB2,AtAREB2	NOVEL	30/1532	198/30167	8.47e-08	2.32e-06	30	AT1G02390/AT1G11190/AT1G21000/AT1G30700/AT1G32450/AT1G54570/AT1G69490/AT1G76680/AT2G18690/AT2G25460/AT2G31570/AT2G44300/AT2G46950/AT3G11340/AT3G25882/AT3G56400/AT4G01870/AT4G02380/AT4G10500/AT4G15610/AT4G23810/AT4G32940/AT4G36040/AT5G24530/AT5G25930/AT5G37600/AT5G44610/AT5G52310/AT5G56870/AT5G62165
GO:0010150	leaf senescence	661	AT1G32730	AT1G32730	NOVEL	21/1523	198/30167	0.00110436	0.0109576	21	AT1G02390/AT1G11190/AT1G30700/AT1G32450/AT1G76680/AT2G31570/AT2G37750/AT2G39200/AT2G44300/AT2G46950/AT3G11340/AT3G60670/AT4G01870/AT4G02380/AT4G10500/AT4G15610/AT4G32940/AT5G24530/AT5G37600/AT5G44610/AT5G52310
GO:0010150	leaf senescence	662	AT3G57390	AGL18	NOVEL	25/1523	198/30167	2.39e-05	0.000411163	25	AT1G01680/AT1G02390/AT1G30700/AT1G32450/AT1G54570/AT1G69490/AT1G73500/AT1G76680/AT2G13810/AT2G31570/AT2G44300/AT2G46950/AT3G11340/AT3G25882/AT4G01870/AT4G02380/AT4G15610/AT4G32940/AT4G36040/AT5G24530/AT5G25930/AT5G37600/AT5G44610/AT5G52310/AT5G62165
GO:0010150	leaf senescence	663	AT4G01680	AtMYB55,MYB55	NOVEL	23/1511	198/30167	0.000158737	0.0028263	23	AT1G02390/AT1G11190/AT1G30700/AT1G32450/AT1G54570/AT1G73220/AT1G76680/AT2G25460/AT2G34610/AT2G46950/AT3G07350/AT3G11340/AT3G60670/AT4G01870/AT4G02380/AT4G15610/AT4G36040/AT5G24530/AT5G25930/AT5G52310/AT5G56870/AT5G59220/AT5G62165
GO:0010150	leaf senescence	664	AT2G23320	AtWRKY15,WRKY15	NOVEL	33/1527	198/30167	1.56e-09	5.64e-08	33	AT1G02390/AT1G08050/AT1G30700/AT1G32450/AT1G66880/AT1G69490/AT1G73500/AT1G76980/AT2G13790/AT2G18690/AT2G25460/AT2G31570/AT2G44300/AT2G46950/AT3G11340/AT3G25882/AT3G52430/AT3G56400/AT4G01870/AT4G02380/AT4G10500/AT4G12735/AT4G15610/AT4G23810/AT5G03280/AT5G24530/AT5G25930/AT5G37600/AT5G44610/AT5G52310/AT5G56870/AT5G62165/AT5G63130
GO:0010150	leaf senescence	665	AT3G15210	ATERF-4,ATERF4,ERF4,RAP2.5	NOVEL	35/1528	198/30167	9.74e-11	3.67e-09	35	AT1G02390/AT1G11190/AT1G30700/AT1G32450/AT1G54570/AT1G69490/AT1G73500/AT2G18690/AT2G22300/AT2G25460/AT2G25625/AT2G31570/AT2G37750/AT2G44300/AT2G46950/AT3G10500/AT3G11340/AT3G52430/AT3G56400/AT4G01870/AT4G02380/AT4G10500/AT4G14365/AT4G15610/AT4G23810/AT4G32940/AT4G36040/AT5G03280/AT5G24530/AT5G25930/AT5G37600/AT5G44610/AT5G52310/AT5G62165/AT5G63130
GO:0010150	leaf senescence	666	AT5G28300	AtGT2L,GT2L	NOVEL	20/1516	198/30167	0.00242641	0.0299523	20	AT1G11190/AT1G30700/AT1G32450/AT1G73220/AT1G76680/AT2G13810/AT2G31570/AT2G44480/AT3G10985/AT3G11340/AT3G60670/AT4G01870/AT4G02380/AT4G15610/AT4G32940/AT4G36040/AT5G25930/AT5G37600/AT5G52310/AT5G62000
GO:0010150	leaf senescence	667	AT1G74430	ATMYB95,ATMYBCP66,MYB95	NOVEL	22/1503	198/30167	0.000379918	0.00580385	22	AT1G01680/AT1G11190/AT1G30700/AT1G32450/AT1G54040/AT1G73500/AT1G76680/AT2G25460/AT2G39730/AT2G44300/AT3G25010/AT3G25882/AT4G01870/AT4G10500/AT4G12735/AT4G15610/AT4G32940/AT5G24110/AT5G52310/AT5G56870/AT5G59220/AT5G62165
GO:0010150	leaf senescence	668	AT3G58630	AT3G58630	NOVEL	23/1515	198/30167	0.000164945	0.00205081	23	AT1G01680/AT1G02390/AT1G32450/AT1G54570/AT1G69490/AT1G76680/AT2G31570/AT2G39200/AT2G44300/AT2G46950/AT3G11340/AT3G25882/AT4G01870/AT4G02380/AT4G10500/AT4G15610/AT4G32940/AT5G24530/AT5G25930/AT5G37600/AT5G44610/AT5G52310/AT5G62165
GO:0010150	leaf senescence	669	AT5G44210	ATERF-9,ATERF9,ERF9	NOVEL	35/1516	198/30167	7.87e-11	4.91e-09	35	AT1G01680/AT1G02390/AT1G20900/AT1G30700/AT1G32450/AT1G54130/AT1G66830/AT1G69490/AT1G73500/AT1G76680/AT2G18690/AT2G25460/AT2G34610/AT2G37750/AT2G39200/AT2G42540/AT2G44300/AT2G44480/AT2G46950/AT3G14060/AT3G25010/AT3G25882/AT3G56400/AT4G01870/AT4G02380/AT4G15610/AT4G23810/AT4G32940/AT5G24530/AT5G25930/AT5G37600/AT5G44610/AT5G52310/AT5G56870/AT5G62165
GO:0010150	leaf senescence	670	AT2G28450	TRM2b	NOVEL	23/1520	198/30167	0.000173007	0.00267162	23	AT1G01680/AT1G02390/AT1G30700/AT1G32450/AT1G54040/AT1G76680/AT2G25460/AT2G44300/AT2G46950/AT3G11340/AT3G25010/AT4G01870/AT4G02380/AT4G12735/AT4G15610/AT4G32940/AT5G03280/AT5G24530/AT5G25930/AT5G37600/AT5G44610/AT5G52310/AT5G62165
GO:0010150	leaf senescence	671	AT4G14410	bHLH104	NOVEL	31/1513	198/30167	1.8e-08	6.02e-07	31	AT1G02390/AT1G11190/AT1G30700/AT1G31040/AT1G32450/AT1G54570/AT1G69490/AT1G73500/AT1G76680/AT2G18690/AT2G25460/AT2G31570/AT2G37750/AT2G44300/AT2G46950/AT3G11340/AT3G25882/AT3G52430/AT3G56400/AT4G01870/AT4G02380/AT4G15610/AT4G23810/AT4G32940/AT5G24530/AT5G25930/AT5G37600/AT5G44610/AT5G52310/AT5G62165/AT5G64940
GO:0010150	leaf senescence	672	AT1G75710	AT1G75710	NOVEL	26/1504	198/30167	6.55e-06	0.000171032	26	AT1G02390/AT1G20900/AT1G30700/AT1G31040/AT1G32450/AT1G76680/AT2G22300/AT2G25460/AT2G31570/AT2G34610/AT2G44300/AT2G46950/AT3G11340/AT4G01870/AT4G02380/AT4G10500/AT4G15610/AT4G23810/AT4G32940/AT5G24530/AT5G25930/AT5G37600/AT5G44160/AT5G44610/AT5G52300/AT5G52310
GO:0010150	leaf senescence	673	AT5G05660	ATNFXL2,EBI,NFXL2	NOVEL	25/1504	198/30167	1.94e-05	0.000392825	25	AT1G01680/AT1G02390/AT1G11190/AT1G30700/AT1G32450/AT1G54570/AT1G76680/AT2G13810/AT2G31570/AT2G39200/AT2G44300/AT2G46950/AT3G05400/AT3G25882/AT4G01870/AT4G02380/AT4G10500/AT4G15610/AT4G32940/AT5G24530/AT5G25930/AT5G37600/AT5G44610/AT5G52310/AT5G62165
GO:0010150	leaf senescence	674	AT3G57480	SAP13	NOVEL	35/1504	198/30167	6.35e-11	2.41e-09	35	AT1G01680/AT1G02390/AT1G11190/AT1G30700/AT1G32450/AT1G54570/AT1G69490/AT1G76680/AT2G18690/AT2G25460/AT2G31570/AT2G39200/AT2G44300/AT2G44480/AT2G46950/AT3G05400/AT3G11340/AT3G25882/AT3G52430/AT3G56400/AT4G01870/AT4G02380/AT4G10500/AT4G15610/AT4G23810/AT4G32940/AT4G36040/AT5G24530/AT5G25930/AT5G37600/AT5G44610/AT5G52310/AT5G59220/AT5G62165/AT5G63130
GO:0010150	leaf senescence	675	AT5G61600	ERF104	NOVEL	32/1507	198/30167	4.38e-09	1.73e-07	32	AT1G02390/AT1G11190/AT1G21000/AT1G30700/AT1G32450/AT1G73500/AT1G76680/AT2G13810/AT2G18690/AT2G22300/AT2G25460/AT2G39200/AT2G44300/AT2G46950/AT3G10500/AT3G11340/AT3G25882/AT3G56400/AT4G01870/AT4G02380/AT4G10500/AT4G15610/AT4G23810/AT4G32940/AT5G03280/AT5G24530/AT5G25930/AT5G37600/AT5G44610/AT5G52310/AT5G62000/AT5G63130
GO:0010150	leaf senescence	676	AT5G06960	OBF5,TGA5	NOVEL	30/1502	198/30167	5.51e-08	1.6e-06	30	AT1G02390/AT1G21000/AT1G30700/AT1G32450/AT1G54570/AT1G69490/AT1G76680/AT1G76980/AT2G18690/AT2G25460/AT2G31570/AT2G39200/AT2G44300/AT2G46950/AT3G11340/AT3G25882/AT4G01870/AT4G02380/AT4G10500/AT4G15610/AT4G23810/AT4G32940/AT4G36040/AT5G24530/AT5G25930/AT5G37600/AT5G44610/AT5G52310/AT5G62165/AT5G63130
GO:0010150	leaf senescence	677	AT1G21200	AT1G21200	NOVEL	27/1498	198/30167	1.97e-06	3.55e-05	27	AT1G02390/AT1G30700/AT1G32450/AT1G54570/AT1G76680/AT2G31570/AT2G39200/AT2G39730/AT2G44300/AT2G46950/AT3G25882/AT4G01870/AT4G02380/AT4G10500/AT4G15610/AT4G32940/AT4G36040/AT5G24110/AT5G24530/AT5G25930/AT5G37600/AT5G39050/AT5G44610/AT5G52310/AT5G62165/AT5G63130/AT5G64940
GO:0010150	leaf senescence	678	AT3G19860	bHLH121	NOVEL	28/1501	198/30167	6.35e-07	1.43e-05	28	AT1G02390/AT1G30700/AT1G32450/AT1G54570/AT1G69490/AT1G73500/AT1G76680/AT2G22300/AT2G25460/AT2G39200/AT2G44300/AT2G46950/AT3G05400/AT3G25882/AT4G01870/AT4G02380/AT4G10500/AT4G12735/AT4G15610/AT4G32940/AT4G36040/AT5G24530/AT5G25930/AT5G37600/AT5G44610/AT5G52310/AT5G62000/AT5G62165
GO:0010150	leaf senescence	679	AT2G41835	AT2G41835	NOVEL	40/1493	198/30167	2.37e-14	1.22e-12	40	AT1G01680/AT1G02390/AT1G11190/AT1G30700/AT1G32450/AT1G54130/AT1G66880/AT1G73500/AT1G76680/AT2G13810/AT2G18690/AT2G22300/AT2G25460/AT2G31570/AT2G35980/AT2G39200/AT2G43000/AT2G44300/AT2G44480/AT2G46950/AT3G11340/AT3G25010/AT3G25882/AT3G56400/AT4G01870/AT4G02380/AT4G10500/AT4G14370/AT4G15610/AT4G23810/AT4G32940/AT4G36040/AT5G24110/AT5G24530/AT5G25930/AT5G37600/AT5G44610/AT5G52310/AT5G62165/AT5G63130
GO:0010150	leaf senescence	680	AT1G72010	AtTCP22,TCP22	NOVEL	25/1487	198/30167	1.6e-05	0.000319231	25	AT1G02390/AT1G30700/AT1G32450/AT1G54570/AT1G73500/AT1G76680/AT2G13810/AT2G25460/AT2G44300/AT2G46950/AT3G05400/AT3G11340/AT3G25882/AT3G56400/AT4G01870/AT4G02380/AT4G32940/AT4G36040/AT5G24530/AT5G25930/AT5G37600/AT5G44610/AT5G52310/AT5G62165/AT5G64940
GO:0010150	leaf senescence	681	AT2G23290	AtMYB70,MYB70	NOVEL	27/1486	198/30167	1.69e-06	3.59e-05	27	AT1G02390/AT1G21000/AT1G30700/AT1G32450/AT1G54570/AT1G69490/AT1G73500/AT1G76680/AT2G25460/AT2G31570/AT2G39200/AT2G44300/AT2G46950/AT3G11340/AT3G56400/AT4G01250/AT4G01870/AT4G02380/AT4G15610/AT4G23810/AT4G32940/AT4G36040/AT5G24530/AT5G37600/AT5G52310/AT5G56870/AT5G62165
GO:0010150	leaf senescence	682	AT2G30590	WRKY21	NOVEL	20/1482	198/30167	0.00186764	0.0161218	20	AT1G02390/AT1G30700/AT1G32450/AT1G54570/AT1G69490/AT1G76680/AT2G13810/AT2G44300/AT2G46950/AT3G05400/AT3G11340/AT3G25882/AT4G01870/AT4G02380/AT4G32940/AT4G36040/AT5G24530/AT5G44610/AT5G52310/AT5G62165
GO:0010150	leaf senescence	683	AT5G05550	ENAP2,VFP5	NOVEL	25/1487	198/30167	1.6e-05	0.000340118	25	AT1G01680/AT1G02390/AT1G30700/AT1G31040/AT1G32450/AT1G54130/AT1G69490/AT1G76680/AT2G13810/AT2G39200/AT2G44300/AT2G46950/AT3G05400/AT3G11340/AT3G56400/AT4G01870/AT4G10500/AT4G32940/AT4G36040/AT5G24530/AT5G25930/AT5G44610/AT5G52310/AT5G62000/AT5G62165
GO:0010150	leaf senescence	684	AT2G17040	anac036,NAC036	NOVEL	29/1489	198/30167	1.6e-07	3.89e-06	29	AT1G01680/AT1G02390/AT1G18210/AT1G21000/AT1G32450/AT1G73500/AT2G22300/AT2G25460/AT2G44300/AT3G07350/AT3G10985/AT3G25010/AT3G25882/AT3G56400/AT4G01250/AT4G01870/AT4G02380/AT4G14365/AT4G23810/AT4G32940/AT4G36040/AT5G24110/AT5G25930/AT5G51720/AT5G52310/AT5G62000/AT5G62165/AT5G63130/AT5G64940
GO:0010150	leaf senescence	685	AT4G31550	ATWRKY11,WRKY11	NOVEL	24/1488	198/30167	4.64e-05	0.000624872	24	AT1G02390/AT1G11190/AT1G30700/AT1G32450/AT1G54570/AT1G73500/AT2G25460/AT2G31570/AT2G44300/AT2G46950/AT3G11340/AT3G25882/AT3G56400/AT4G01870/AT4G02380/AT4G10500/AT4G14370/AT4G15610/AT4G23810/AT5G24530/AT5G25930/AT5G44610/AT5G52310/AT5G62165
GO:0010150	leaf senescence	686	AT5G05790	AT5G05790	NOVEL	19/1468	198/30167	0.00381852	0.031956	19	AT1G11190/AT1G20900/AT1G30700/AT1G31040/AT1G32450/AT1G54570/AT1G76680/AT2G34610/AT3G11340/AT3G25882/AT4G01870/AT4G02380/AT4G15610/AT4G32940/AT4G36040/AT5G25930/AT5G44160/AT5G52310/AT5G63130
GO:0010150	leaf senescence	687	AT4G37260	ATMYB73,MYB73	NOVEL	30/1492	198/30167	4.76e-08	1.39e-06	30	AT1G02390/AT1G08050/AT1G11190/AT1G30700/AT1G32450/AT1G73500/AT1G76680/AT2G18690/AT2G25460/AT2G37750/AT2G39200/AT2G44300/AT2G46950/AT3G11340/AT3G25882/AT3G56400/AT4G01870/AT4G02380/AT4G10500/AT4G15610/AT4G23810/AT4G32940/AT5G24530/AT5G25930/AT5G37600/AT5G44610/AT5G52310/AT5G56870/AT5G59220/AT5G63130
GO:0010150	leaf senescence	688	AT1G75250	ATRL6,RL6,RSM3	NOVEL	23/1481	198/30167	0.000118421	0.00247669	23	AT1G01680/AT1G02390/AT1G18210/AT1G32450/AT1G54040/AT1G69490/AT1G73500/AT1G76680/AT2G13810/AT2G18690/AT2G25460/AT3G25010/AT3G25882/AT4G01250/AT4G01870/AT4G02380/AT4G14365/AT4G23810/AT4G32940/AT5G24110/AT5G37600/AT5G62000/AT5G62165
GO:0010150	leaf senescence	689	AT5G02470	AT5G02470	NOVEL	24/1479	198/30167	4.22e-05	0.000703648	24	AT1G01680/AT1G02390/AT1G32450/AT1G54570/AT1G76680/AT2G13810/AT2G25460/AT2G44300/AT2G46950/AT3G05400/AT3G11340/AT3G25882/AT4G01870/AT4G02380/AT4G10500/AT4G15610/AT4G32940/AT5G24110/AT5G24530/AT5G25930/AT5G37600/AT5G44610/AT5G52310/AT5G62165
GO:0010150	leaf senescence	690	AT3G06410	AT3G06410	NOVEL	25/1480	198/30167	1.48e-05	0.000263594	25	AT1G01680/AT1G02390/AT1G32450/AT1G54130/AT1G54570/AT2G22300/AT2G25460/AT2G31570/AT2G44300/AT2G46950/AT3G11340/AT3G25882/AT4G01870/AT4G02380/AT4G10500/AT4G15610/AT4G23810/AT4G32940/AT5G24530/AT5G25930/AT5G37600/AT5G44610/AT5G52310/AT5G62000/AT5G62165
GO:0010150	leaf senescence	691	AT1G08010	GATA11	NOVEL	27/1477	198/30167	1.51e-06	3.69e-05	27	AT1G01680/AT1G02390/AT1G11190/AT1G30700/AT1G32450/AT1G54570/AT1G69490/AT1G76680/AT2G25460/AT2G39200/AT2G44300/AT2G46950/AT3G11340/AT3G25882/AT4G01870/AT4G02380/AT4G10500/AT4G15610/AT4G32940/AT4G36040/AT5G24530/AT5G25930/AT5G37600/AT5G44610/AT5G52300/AT5G52310/AT5G62165
GO:0010150	leaf senescence	692	AT1G68920	bHLH49,CIL1	NOVEL	28/1481	198/30167	4.87e-07	1.2e-05	28	AT1G02390/AT1G21000/AT1G30700/AT1G32450/AT1G54570/AT1G73500/AT1G76680/AT2G25460/AT2G31570/AT2G37750/AT2G39200/AT2G39730/AT2G44300/AT2G46950/AT4G01870/AT4G02380/AT4G15610/AT4G23810/AT4G32940/AT4G36040/AT5G24530/AT5G25930/AT5G37600/AT5G44610/AT5G52310/AT5G56870/AT5G62165/AT5G63130
GO:0010150	leaf senescence	693	AT1G14410	ATWHY1,PTAC1,WHY1	NOVEL	19/1482	198/30167	0.00422569	0.0352498	19	AT1G01680/AT1G02390/AT1G32450/AT1G69490/AT1G76680/AT2G22300/AT2G25460/AT2G31570/AT2G44300/AT2G46950/AT3G11340/AT3G60670/AT4G01870/AT4G02380/AT4G15610/AT4G32940/AT4G36040/AT5G24530/AT5G52310
GO:0010150	leaf senescence	694	AT3G21175	GATA24,TIFY2B,ZML1,ZML1	NOVEL	25/1470	198/30167	1.32e-05	0.000267308	25	AT1G02390/AT1G30700/AT1G31040/AT1G32450/AT1G54570/AT1G76680/AT2G25460/AT2G44300/AT2G46950/AT3G05400/AT3G11340/AT3G25010/AT3G25882/AT4G01870/AT4G02380/AT4G10500/AT4G15610/AT4G23810/AT4G32940/AT5G24530/AT5G25930/AT5G37600/AT5G44610/AT5G52310/AT5G62165
GO:0010150	leaf senescence	695	AT4G23810	ATWRKY53,WRKY53	KNOWN	34/1474	198/30167	1.57e-10	7.56e-09	34	AT1G01680/AT1G02390/AT1G30700/AT1G32450/AT1G66830/AT1G66880/AT1G73500/AT1G76680/AT2G18690/AT2G22300/AT2G25460/AT2G25625/AT2G30550/AT2G43000/AT3G25010/AT3G25882/AT3G26210/AT3G52430/AT3G56400/AT4G10500/AT4G14365/AT4G15610/AT4G18980/AT4G32940/AT5G24110/AT5G24530/AT5G25930/AT5G37600/AT5G51720/AT5G52310/AT5G59220/AT5G62000/AT5G62165/AT5G63130
GO:0010150	leaf senescence	696	AT5G12840	ATHAP2A,AtNFYA1,EMB2220,HAP2A,NF-YA1,NFYA1	NOVEL	24/1469	198/30167	3.79e-05	0.000641853	24	AT1G02390/AT1G11190/AT1G30700/AT1G32450/AT1G54570/AT1G76680/AT2G13810/AT2G18690/AT2G25460/AT2G44300/AT2G46950/AT3G11340/AT3G25882/AT3G56400/AT4G01870/AT4G10500/AT4G32940/AT4G36040/AT5G24530/AT5G25930/AT5G37600/AT5G44610/AT5G52310/AT5G62165
GO:0010150	leaf senescence	697	AT1G20980	ATSPL14,FBR6,SPL14,SPL1R2	NOVEL	24/1467	198/30167	3.71e-05	0.000594897	24	AT1G01680/AT1G02390/AT1G11190/AT1G30700/AT1G32450/AT1G54570/AT1G76680/AT2G44300/AT2G44480/AT2G46950/AT3G11340/AT3G25882/AT4G01870/AT4G02380/AT4G10500/AT4G15610/AT4G32940/AT5G03280/AT5G24530/AT5G25930/AT5G37600/AT5G44610/AT5G52310/AT5G62165
GO:0010150	leaf senescence	698	AT1G76350	NLP5	NOVEL	31/1467	198/30167	8.83e-09	2.72e-07	31	AT1G02390/AT1G11190/AT1G32450/AT1G54570/AT1G73500/AT1G76680/AT1G76980/AT2G18690/AT2G25460/AT2G30550/AT2G31570/AT2G39200/AT2G44300/AT2G46950/AT3G11340/AT3G60670/AT4G01870/AT4G02380/AT4G10500/AT4G15610/AT4G23810/AT4G32940/AT4G36040/AT5G03280/AT5G24530/AT5G25930/AT5G37600/AT5G44610/AT5G52310/AT5G62165/AT5G63130
GO:0010150	leaf senescence	699	AT3G58120	ATBZIP61,BZIP61	NOVEL	21/1461	198/30167	0.000654382	0.00721833	21	AT1G02390/AT1G11190/AT1G30700/AT1G32450/AT1G76680/AT2G25460/AT2G34610/AT2G39200/AT2G44300/AT2G46950/AT3G11340/AT3G25010/AT3G25882/AT4G01870/AT4G02380/AT4G15610/AT4G32940/AT5G03280/AT5G24110/AT5G44610/AT5G52310
GO:0010150	leaf senescence	700	AT5G59450	AT5G59450	NOVEL	33/1469	198/30167	5.93e-10	2.68e-08	33	AT1G02390/AT1G08050/AT1G11190/AT1G21000/AT1G30700/AT1G32450/AT1G54570/AT1G73500/AT1G76980/AT2G18690/AT2G25460/AT2G31570/AT2G37750/AT2G44300/AT2G46950/AT3G11340/AT3G56400/AT4G01870/AT4G02380/AT4G10500/AT4G15610/AT4G23810/AT4G30490/AT4G32940/AT4G36040/AT5G24530/AT5G25930/AT5G37600/AT5G44610/AT5G52310/AT5G59220/AT5G62165/AT5G63130
GO:0010150	leaf senescence	701	AT2G42300	AT2G42300	NOVEL	24/1457	198/30167	3.33e-05	0.000563311	24	AT1G01680/AT1G02390/AT1G30700/AT1G32450/AT1G54570/AT1G76680/AT2G13810/AT2G22300/AT2G39200/AT2G44300/AT2G46950/AT3G05400/AT3G11340/AT3G25882/AT4G01870/AT4G10500/AT4G15610/AT4G32940/AT5G24530/AT5G25930/AT5G37600/AT5G44610/AT5G52310/AT5G62165
GO:0010150	leaf senescence	702	AT5G07100	WRKY26	NOVEL	46/1467	198/30167	4.16e-19	3.8e-17	46	AT1G01680/AT1G02390/AT1G11190/AT1G13990/AT1G30700/AT1G32450/AT1G36622/AT1G54130/AT1G69490/AT1G73500/AT1G76680/AT1G76980/AT2G18690/AT2G25460/AT2G31570/AT2G37750/AT2G39200/AT2G42540/AT2G43000/AT2G44480/AT3G10985/AT3G14060/AT3G25010/AT3G25882/AT3G26210/AT3G29035/AT3G48020/AT3G56400/AT4G01870/AT4G02380/AT4G10500/AT4G12735/AT4G14365/AT4G15610/AT4G18980/AT4G23810/AT4G32940/AT4G36040/AT5G24530/AT5G25930…
GO:0010150	leaf senescence	703	AT1G28520	ATVOZ1,VOZ1	NOVEL	23/1457	198/30167	9.3e-05	0.00137685	23	AT1G02390/AT1G30700/AT1G32450/AT1G54570/AT1G76680/AT2G25460/AT2G31570/AT2G44300/AT2G46950/AT3G11340/AT3G25882/AT4G01870/AT4G02380/AT4G10500/AT4G23810/AT4G32940/AT4G36040/AT5G24530/AT5G25930/AT5G44610/AT5G52310/AT5G62000/AT5G62165
GO:0010150	leaf senescence	704	AT2G16400	BLH7	NOVEL	19/1442	198/30167	0.0031489	0.0311911	19	AT1G01680/AT1G32450/AT1G54570/AT1G76680/AT2G13810/AT2G35980/AT2G44300/AT2G46950/AT3G11340/AT3G25882/AT4G01870/AT4G15610/AT4G32940/AT5G24530/AT5G25930/AT5G37600/AT5G44610/AT5G52310/AT5G62165
GO:0010150	leaf senescence	705	AT3G55730	AtMYB109,MYB109	NOVEL	27/1437	198/30167	8.97e-07	2.17e-05	27	AT1G02390/AT1G11190/AT1G30700/AT1G32450/AT1G54570/AT1G76680/AT1G76980/AT2G31570/AT2G34610/AT2G37750/AT2G39200/AT2G46950/AT3G05400/AT3G11340/AT3G25882/AT3G60670/AT4G01870/AT4G02380/AT4G15610/AT4G23810/AT4G32940/AT5G25930/AT5G37600/AT5G44610/AT5G52310/AT5G62165/AT5G63130
GO:0010150	leaf senescence	706	AT1G32150	AtbZIP68,bZIP68	NOVEL	24/1441	198/30167	2.79e-05	0.000565146	24	AT1G02390/AT1G11190/AT1G30700/AT1G32450/AT1G54130/AT1G54570/AT1G69490/AT1G76680/AT2G13810/AT2G39730/AT2G44300/AT2G46950/AT3G11340/AT3G25882/AT4G01870/AT4G10500/AT4G23810/AT4G32940/AT5G24530/AT5G25930/AT5G37600/AT5G44610/AT5G52310/AT5G62165
GO:0010150	leaf senescence	707	AT3G16350	AT3G16350	NOVEL	30/1447	198/30167	2.42e-08	7.62e-07	30	AT1G02390/AT1G11190/AT1G21000/AT1G30700/AT1G32450/AT1G54130/AT1G54570/AT1G73500/AT1G76980/AT2G22300/AT2G25460/AT2G31570/AT2G44300/AT2G46950/AT3G07350/AT3G11340/AT3G56400/AT4G01870/AT4G02380/AT4G10500/AT4G15610/AT4G23810/AT4G32940/AT5G24530/AT5G25930/AT5G37600/AT5G44610/AT5G52310/AT5G62165/AT5G63130
GO:0010150	leaf senescence	708	AT2G24830	AT2G24830	NOVEL	24/1442	198/30167	2.82e-05	0.000447745	24	AT1G02390/AT1G30700/AT1G32450/AT1G54570/AT1G76680/AT2G13810/AT2G25460/AT2G31570/AT2G44300/AT2G46950/AT3G25882/AT4G01870/AT4G02380/AT4G10500/AT4G15610/AT4G23810/AT4G32940/AT4G36040/AT5G24530/AT5G25930/AT5G37600/AT5G44610/AT5G52310/AT5G62165
GO:0010150	leaf senescence	709	AT4G38960	BBX19	NOVEL	28/1444	198/30167	2.93e-07	9.45e-06	28	AT1G02390/AT1G30700/AT1G32450/AT1G73500/AT1G76680/AT2G22300/AT2G25460/AT2G31570/AT2G39200/AT2G39730/AT2G44300/AT2G44480/AT2G46950/AT3G25882/AT4G01870/AT4G10500/AT4G15610/AT4G23810/AT4G32940/AT5G24530/AT5G25930/AT5G37600/AT5G44610/AT5G52310/AT5G59220/AT5G62165/AT5G63130/AT5G64940
GO:0010150	leaf senescence	710	AT3G47640	PYE	NOVEL	24/1436	198/30167	2.64e-05	0.000480357	24	AT1G02390/AT1G30700/AT1G32450/AT1G54570/AT1G69490/AT1G76680/AT2G25460/AT2G34610/AT2G44300/AT2G46950/AT3G05400/AT3G11340/AT3G22910/AT4G01870/AT4G02380/AT4G15610/AT4G23810/AT4G32940/AT5G24530/AT5G25930/AT5G37600/AT5G44160/AT5G44610/AT5G52310
GO:0010150	leaf senescence	711	AT1G22985	CRF7	NOVEL	31/1432	198/30167	5.04e-09	1.83e-07	31	AT1G02390/AT1G11190/AT1G21000/AT1G30700/AT1G32450/AT1G54570/AT1G69490/AT1G73500/AT1G76680/AT2G18690/AT2G25460/AT2G25625/AT2G30550/AT2G31570/AT2G39200/AT2G44300/AT2G44480/AT2G46950/AT3G25882/AT3G56400/AT4G01870/AT4G02380/AT4G10500/AT4G15610/AT4G23810/AT5G24530/AT5G25930/AT5G44610/AT5G52310/AT5G62165/AT5G64940
GO:0010150	leaf senescence	712	AT5G67190	DEAR2	NOVEL	28/1428	198/30167	2.34e-07	6.09e-06	28	AT1G02390/AT1G11190/AT1G21000/AT1G30700/AT1G32450/AT1G54570/AT1G73500/AT1G76680/AT2G25460/AT2G31570/AT2G44300/AT2G44480/AT2G46950/AT3G05400/AT3G07350/AT3G11340/AT3G25882/AT3G56400/AT4G01870/AT4G10500/AT4G15610/AT4G23810/AT5G24530/AT5G25930/AT5G37600/AT5G44610/AT5G52310/AT5G62165
GO:0010150	leaf senescence	713	AT3G28920	AtHB34,HB34,ZHD9	NOVEL	25/1430	198/30167	8.28e-06	0.000143161	25	AT1G02390/AT1G11190/AT1G30700/AT1G32450/AT1G54570/AT2G25460/AT2G31570/AT2G37750/AT2G39200/AT2G44300/AT2G46950/AT3G11340/AT3G25882/AT4G01870/AT4G02380/AT4G10500/AT4G15610/AT4G23810/AT4G32940/AT4G36040/AT5G24530/AT5G25930/AT5G44610/AT5G52310/AT5G62165
GO:0010150	leaf senescence	714	AT5G52660	RVE6	NOVEL	25/1429	198/30167	8.18e-06	0.000138093	25	AT1G02390/AT1G11190/AT1G30700/AT1G32450/AT1G54130/AT1G54570/AT1G76680/AT2G13810/AT2G22300/AT2G25460/AT2G44300/AT2G46950/AT3G11340/AT3G25882/AT4G01870/AT4G10500/AT4G15610/AT4G23810/AT4G32940/AT5G24530/AT5G25930/AT5G37600/AT5G44610/AT5G52310/AT5G62165
GO:0010150	leaf senescence	715	AT2G26940	AT2G26940	NOVEL	21/1416	198/30167	0.000437012	0.011508	21	AT1G01680/AT1G21000/AT1G32450/AT1G73220/AT1G73500/AT2G13810/AT2G22300/AT2G30550/AT2G34610/AT2G43000/AT3G14067/AT3G25010/AT3G25882/AT4G10500/AT4G32940/AT5G24110/AT5G24530/AT5G25930/AT5G52310/AT5G56870/AT5G62165
GO:0010150	leaf senescence	716	AT4G18170	ATWRKY28,WRKY28	NOVEL	29/1436	198/30167	7.47e-08	2.13e-06	29	AT1G11190/AT1G18210/AT1G21000/AT1G30700/AT1G32450/AT1G73500/AT1G76680/AT1G76980/AT2G18690/AT2G25460/AT2G30550/AT2G37750/AT2G39200/AT2G44300/AT3G10985/AT3G11340/AT3G25882/AT4G01250/AT4G01870/AT4G02380/AT4G12735/AT4G15610/AT4G32940/AT4G36040/AT5G24530/AT5G37600/AT5G52310/AT5G56870/AT5G59220
GO:0010150	leaf senescence	717	AT3G53820	AT3G53820	NOVEL	28/1416	198/30167	1.98e-07	6.91e-06	28	AT1G01680/AT1G02390/AT1G11190/AT1G30700/AT1G76680/AT1G76980/AT2G13810/AT2G18690/AT2G25460/AT2G37750/AT2G39200/AT2G44300/AT3G10985/AT3G25882/AT3G29035/AT3G56400/AT4G01250/AT4G02380/AT4G15610/AT4G32940/AT4G36040/AT5G24110/AT5G24530/AT5G37600/AT5G44610/AT5G52310/AT5G62165/AT5G63130
GO:0010150	leaf senescence	718	AT4G06634	AT4G06634	NOVEL	27/1427	198/30167	7.85e-07	2.38e-05	27	AT1G01680/AT1G02390/AT1G11190/AT1G30700/AT1G32450/AT1G54570/AT1G69490/AT1G76680/AT2G13810/AT2G35980/AT2G39200/AT2G46950/AT3G05400/AT3G11340/AT3G25010/AT3G25882/AT4G01870/AT4G02380/AT4G10500/AT4G15610/AT4G32940/AT5G24530/AT5G25930/AT5G37600/AT5G44610/AT5G52310/AT5G62165
GO:0010150	leaf senescence	719	AT3G06590	AIF2,RITF1	NOVEL	25/1432	198/30167	8.48e-06	0.000133491	25	AT1G02390/AT1G30700/AT1G32450/AT1G73500/AT1G76680/AT2G25460/AT2G31570/AT2G39200/AT2G44300/AT2G44480/AT2G46950/AT3G11340/AT3G25882/AT4G01870/AT4G02380/AT4G15610/AT4G32940/AT5G03280/AT5G24530/AT5G25930/AT5G44610/AT5G52310/AT5G62000/AT5G62165/AT5G64940
GO:0010150	leaf senescence	720	AT5G19490	AT5G19490	NOVEL	26/1419	198/30167	2.31e-06	0.000122248	26	AT1G01680/AT1G02390/AT1G30700/AT1G32450/AT1G36622/AT1G54040/AT1G76680/AT2G13810/AT2G18690/AT2G31570/AT2G34610/AT2G35980/AT2G39730/AT2G46950/AT3G25010/AT4G01870/AT4G02380/AT4G10500/AT4G12735/AT4G14370/AT4G23810/AT4G32940/AT5G24530/AT5G37600/AT5G52310/AT5G62000
GO:0010150	leaf senescence	721	AT1G49130	BBX17	NOVEL	22/1425	198/30167	0.000182325	0.00374727	22	AT1G11190/AT1G32450/AT1G66830/AT1G73500/AT1G76680/AT2G13810/AT2G25460/AT2G43000/AT3G10985/AT3G25882/AT4G01870/AT4G02380/AT4G10500/AT4G15610/AT4G23810/AT4G36040/AT5G03280/AT5G37600/AT5G44160/AT5G52310/AT5G56870/AT5G62165
GO:0010150	leaf senescence	722	AT4G00940	AtDOF4.1,DOF4.1,ITD1	NOVEL	22/1412	198/30167	0.000160308	0.00273668	22	AT1G18210/AT1G21000/AT1G30700/AT1G32450/AT1G73500/AT1G76680/AT2G18690/AT2G25460/AT2G34610/AT2G37750/AT3G05400/AT3G10985/AT3G11340/AT3G25882/AT4G01870/AT4G02380/AT4G10500/AT4G15610/AT4G36040/AT5G52310/AT5G59220/AT5G63130
GO:0010150	leaf senescence	723	AT1G62300	ATWRKY6,WRKY6	NOVEL	33/1421	198/30167	2.55e-10	1.02e-08	33	AT1G02390/AT1G11190/AT1G30700/AT1G32450/AT1G73500/AT1G76680/AT1G76980/AT2G18690/AT2G22300/AT2G25460/AT2G31570/AT2G35980/AT2G37750/AT2G39200/AT2G44300/AT2G44480/AT2G46950/AT3G11340/AT3G22910/AT3G25882/AT3G56400/AT4G01870/AT4G02380/AT4G10500/AT4G15610/AT4G23810/AT5G03280/AT5G25930/AT5G44610/AT5G52310/AT5G56870/AT5G62165/AT5G63130
GO:0010150	leaf senescence	724	AT3G57230	AGL16	NOVEL	29/1426	198/30167	6.44e-08	1.98e-06	29	AT1G02390/AT1G08050/AT1G11190/AT1G21000/AT1G30700/AT1G32450/AT1G54570/AT1G76680/AT2G25625/AT2G31570/AT2G37750/AT2G39200/AT2G44300/AT2G46950/AT3G11340/AT3G25882/AT3G56400/AT4G01870/AT4G02380/AT4G10500/AT4G15610/AT4G23810/AT4G32940/AT5G24530/AT5G25930/AT5G44610/AT5G52310/AT5G62165/AT5G64940
GO:0010150	leaf senescence	725	AT1G32330	AT1G32330	NOVEL	28/1413	198/30167	1.89e-07	4.91e-06	28	AT1G01680/AT1G02390/AT1G11190/AT1G30700/AT1G32450/AT1G54570/AT1G76680/AT1G76980/AT2G25460/AT2G31570/AT2G35980/AT2G37750/AT2G39200/AT2G44300/AT2G46950/AT3G11340/AT3G25882/AT4G01870/AT4G02380/AT4G15610/AT4G32940/AT5G24110/AT5G25930/AT5G44160/AT5G44610/AT5G52300/AT5G52310/AT5G62165
GO:0010150	leaf senescence	726	AT2G27110	FRS3	NOVEL	23/1407	198/30167	5.51e-05	0.00100585	23	AT1G01680/AT1G11190/AT1G32450/AT1G54130/AT1G54570/AT1G76680/AT2G13810/AT2G35980/AT2G44300/AT2G46950/AT3G05400/AT3G11340/AT3G25882/AT4G02380/AT4G10500/AT4G15610/AT4G32940/AT5G24530/AT5G25930/AT5G37600/AT5G44610/AT5G52310/AT5G62165
GO:0010150	leaf senescence	727	AT3G13040	gammaMYB2	NOVEL	30/1414	198/30167	1.45e-08	6.16e-07	30	AT1G02390/AT1G11190/AT1G21000/AT1G30700/AT1G32450/AT1G54130/AT1G54570/AT1G69490/AT1G76680/AT2G22300/AT2G25460/AT2G31570/AT2G37750/AT2G39200/AT2G44300/AT2G46950/AT3G11340/AT3G25882/AT3G56400/AT4G01870/AT4G10500/AT4G15610/AT4G23810/AT4G32940/AT5G24530/AT5G25930/AT5G37600/AT5G44610/AT5G52310/AT5G62165
GO:0010150	leaf senescence	728	AT5G26749	AT5G26749	NOVEL	24/1417	198/30167	2.13e-05	0.0004229	24	AT1G02390/AT1G20900/AT1G30700/AT1G31040/AT1G32450/AT1G66830/AT1G76680/AT2G13810/AT2G18690/AT2G34610/AT2G42540/AT2G44300/AT2G46950/AT3G14060/AT4G01870/AT4G02380/AT4G15610/AT4G23810/AT4G32940/AT5G25930/AT5G44160/AT5G44610/AT5G52310/AT5G62165
GO:0010150	leaf senescence	729	AT3G04060	anac046,NAC046	NOVEL	21/1399	198/30167	0.00037312	0.00526937	21	AT1G02390/AT1G11190/AT1G30700/AT1G32450/AT1G76680/AT2G18690/AT2G25460/AT2G34610/AT2G37750/AT2G46950/AT3G25882/AT3G56400/AT4G02380/AT4G10500/AT4G15610/AT4G32940/AT4G36040/AT5G25930/AT5G37600/AT5G52310/AT5G62165
GO:0010150	leaf senescence	730	AT4G01250	AtWRKY22,WRKY22	KNOWN	28/1421	198/30167	2.12e-07	4.83e-06	28	AT1G02390/AT1G18210/AT1G21000/AT1G30700/AT1G32450/AT1G73500/AT1G76680/AT2G18690/AT2G25460/AT2G31570/AT2G44300/AT3G11340/AT3G22910/AT3G25882/AT3G26210/AT3G56400/AT4G01870/AT4G02380/AT4G10500/AT4G15610/AT4G23810/AT4G32940/AT5G24110/AT5G25930/AT5G37600/AT5G52310/AT5G62000/AT5G63130
GO:0010150	leaf senescence	731	AT5G06110	AtGlsA1,AtGlsA2,ZRF1b	NOVEL	23/1409	198/30167	5.63e-05	0.000915112	23	AT1G01680/AT1G02390/AT1G30700/AT1G32450/AT1G76680/AT2G18690/AT2G25460/AT2G46950/AT3G25882/AT3G60670/AT4G01870/AT4G02380/AT4G10500/AT4G12735/AT4G15610/AT4G32940/AT5G24110/AT5G24530/AT5G25930/AT5G37600/AT5G44610/AT5G52310/AT5G62165
GO:0010150	leaf senescence	732	AT5G10030	OBF4,TGA4	NOVEL	30/1405	198/30167	1.25e-08	4.27e-07	30	AT1G02390/AT1G08050/AT1G11190/AT1G30700/AT1G32450/AT1G54570/AT1G73500/AT1G76680/AT1G76980/AT2G25460/AT2G31570/AT2G39200/AT2G44300/AT2G46950/AT3G07350/AT3G11340/AT3G56400/AT4G01870/AT4G02380/AT4G10500/AT4G15610/AT4G23810/AT4G30490/AT4G32940/AT5G24530/AT5G25930/AT5G44160/AT5G44610/AT5G52310/AT5G63130
GO:0010150	leaf senescence	733	AT3G48590	ATHAP5A,HAP5A,NF-YC1	NOVEL	23/1402	198/30167	5.22e-05	0.000928543	23	AT1G01680/AT1G11190/AT1G30700/AT1G32450/AT1G54570/AT1G76680/AT2G35980/AT2G39200/AT2G44300/AT2G46950/AT3G11340/AT3G25882/AT4G01870/AT4G02380/AT4G10500/AT4G15610/AT4G32940/AT5G24530/AT5G37600/AT5G44610/AT5G52310/AT5G62000/AT5G62165
GO:0010150	leaf senescence	734	AT1G70000	MYBD	NOVEL	28/1403	198/30167	1.64e-07	5.44e-06	28	AT1G02390/AT1G32450/AT1G73500/AT1G76680/AT1G76980/AT2G22300/AT2G25460/AT2G25625/AT2G31570/AT2G44300/AT2G44480/AT2G46950/AT3G05400/AT3G11340/AT3G22910/AT3G56400/AT3G60670/AT4G01870/AT4G02380/AT4G15610/AT4G23810/AT4G30490/AT4G32940/AT5G25930/AT5G37600/AT5G52310/AT5G59220/AT5G63130
GO:0010150	leaf senescence	735	AT2G25900	ATCTH,ATTZF1,TZF1	NOVEL	35/1405	198/30167	9.79e-12	7.33e-10	35	AT1G01680/AT1G02390/AT1G11190/AT1G30700/AT1G32450/AT1G36622/AT1G54570/AT1G69490/AT1G73500/AT1G76680/AT2G18690/AT2G22300/AT2G25460/AT2G44300/AT2G46950/AT3G11340/AT3G25882/AT3G26210/AT3G56400/AT4G01870/AT4G02380/AT4G10500/AT4G15610/AT4G23810/AT5G03280/AT5G24530/AT5G25930/AT5G37600/AT5G44610/AT5G51720/AT5G52310/AT5G59220/AT5G62000/AT5G62165/AT5G64940
GO:0010150	leaf senescence	736	AT2G41900	OXS2,TZF7	NOVEL	21/1394	198/30167	0.000355959	0.00426568	21	AT1G02390/AT1G32450/AT1G54570/AT1G76680/AT2G22300/AT2G35980/AT2G44300/AT2G44480/AT2G46950/AT3G05400/AT3G11340/AT3G25882/AT4G01870/AT4G10500/AT4G32940/AT5G24530/AT5G25930/AT5G37600/AT5G44610/AT5G52310/AT5G62165
GO:0010150	leaf senescence	737	AT5G14140	AT5G14140	NOVEL	29/1400	198/30167	4.35e-08	1.44e-06	29	AT1G02390/AT1G11190/AT1G30700/AT1G31040/AT1G32450/AT1G69490/AT1G73500/AT1G76680/AT2G18690/AT2G25460/AT2G31570/AT2G35980/AT2G37750/AT2G39200/AT2G44300/AT2G46950/AT3G11340/AT3G60670/AT4G01870/AT4G02380/AT4G10500/AT4G15610/AT4G23810/AT4G36040/AT5G25930/AT5G37600/AT5G44610/AT5G52310/AT5G62165
GO:0010150	leaf senescence	738	AT2G41130	bHLH106,STC8	NOVEL	18/1386	198/30167	0.0046695	0.0454662	18	AT1G11190/AT1G30700/AT1G32450/AT1G54570/AT1G76680/AT2G34610/AT2G44300/AT2G46950/AT3G11340/AT3G60670/AT4G01870/AT4G02380/AT4G15610/AT4G32940/AT5G44160/AT5G44610/AT5G52300/AT5G52310
GO:0010150	leaf senescence	739	AT5G67300	ATMYB44,ATMYBR1,MYB44,MYBR1	NOVEL	29/1396	198/30167	4.09e-08	1.25e-06	29	AT1G02390/AT1G08050/AT1G11190/AT1G30700/AT1G32450/AT1G54130/AT1G66880/AT1G73500/AT2G25460/AT2G25625/AT2G30550/AT2G31570/AT2G37750/AT2G39200/AT2G44300/AT2G46950/AT3G11340/AT3G25882/AT3G56400/AT4G01870/AT4G02380/AT4G10500/AT4G15610/AT4G23810/AT4G32940/AT5G25930/AT5G44610/AT5G52310/AT5G63130
GO:0010150	leaf senescence	740	AT4G26640	AtWRKY20,WRKY20	NOVEL	22/1389	198/30167	0.000127068	0.0020472	22	AT1G01680/AT1G02390/AT1G11190/AT1G32450/AT1G54570/AT1G76680/AT2G22300/AT2G35980/AT2G44300/AT2G46950/AT3G11340/AT3G25882/AT4G01870/AT4G10500/AT4G15610/AT4G32940/AT5G24530/AT5G25930/AT5G37600/AT5G44610/AT5G52310/AT5G62165
GO:0010150	leaf senescence	741	AT3G10500	AIF,ANAC053,NAC053,NTL4	KNOWN	30/1389	198/30167	9.69e-09	2.83e-07	30	AT1G02390/AT1G08050/AT1G11190/AT1G21000/AT1G30700/AT1G32450/AT1G54570/AT1G76680/AT1G76980/AT2G18690/AT2G25460/AT2G31570/AT2G37750/AT2G39200/AT2G44300/AT2G46950/AT3G22910/AT4G01870/AT4G02380/AT4G10500/AT4G15610/AT4G23810/AT4G30490/AT4G32940/AT5G24530/AT5G25930/AT5G44610/AT5G52310/AT5G56870/AT5G63130
GO:0010150	leaf senescence	742	AT2G45160	ATHAM1,HAM1,LOM1,SCL27	NOVEL	26/1394	198/30167	1.67e-06	3.16e-05	26	AT1G01680/AT1G02390/AT1G11190/AT1G30700/AT1G32450/AT1G54570/AT1G76680/AT1G76980/AT2G25460/AT2G31570/AT2G39200/AT2G44300/AT2G46950/AT3G25882/AT4G01870/AT4G02380/AT4G10500/AT4G15610/AT4G32940/AT5G24110/AT5G24530/AT5G37600/AT5G44610/AT5G52310/AT5G62165/AT5G63130
GO:0010150	leaf senescence	743	AT4G23980	ARF9	NOVEL	21/1390	198/30167	0.000342733	0.00404389	21	AT1G01680/AT1G30700/AT1G32450/AT1G54130/AT1G54570/AT1G76680/AT2G13810/AT2G44300/AT2G46950/AT3G05400/AT3G11340/AT3G25882/AT4G01870/AT4G10500/AT4G15610/AT4G32940/AT5G24530/AT5G25930/AT5G44610/AT5G52310/AT5G62165
GO:0010150	leaf senescence	744	AT1G34180	anac016,NAC016	NOVEL	27/1395	198/30167	5.07e-07	1.96e-05	27	AT1G01680/AT1G02390/AT1G18210/AT1G32450/AT1G34420/AT1G73500/AT1G76680/AT2G13810/AT2G31570/AT2G34610/AT2G43000/AT2G44480/AT3G14060/AT3G25010/AT3G25882/AT4G01870/AT4G02380/AT4G10500/AT4G15610/AT4G23810/AT4G32940/AT5G24530/AT5G37600/AT5G52310/AT5G56870/AT5G59220/AT5G62165
GO:0010150	leaf senescence	745	AT5G26880	AGL26	NOVEL	22/1384	198/30167	0.000120711	0.00203987	22	AT1G01680/AT1G02390/AT1G30700/AT1G31040/AT1G32450/AT1G54570/AT1G69490/AT1G76680/AT2G25460/AT2G46950/AT3G05400/AT3G25882/AT4G01870/AT4G02380/AT4G15610/AT4G32940/AT5G24530/AT5G25930/AT5G37600/AT5G44610/AT5G52310/AT5G62165
GO:0010150	leaf senescence	746	AT3G59470	AT3G59470	NOVEL	24/1383	198/30167	1.44e-05	0.000327027	24	AT1G01680/AT1G02390/AT1G11190/AT1G30700/AT1G32450/AT1G54570/AT1G69490/AT1G73500/AT1G76680/AT2G25460/AT2G44300/AT2G46950/AT3G25882/AT4G01870/AT4G02380/AT4G10500/AT4G15610/AT4G32940/AT5G24530/AT5G25930/AT5G37600/AT5G44610/AT5G52310/AT5G62165
GO:0010150	leaf senescence	747	AT5G65310	ATHB-5,ATHB5,HB5	NOVEL	22/1383	198/30167	0.000119474	0.00148838	22	AT1G02390/AT1G32450/AT1G54570/AT1G76680/AT2G25460/AT2G31570/AT2G39730/AT2G44300/AT2G46950/AT3G11340/AT3G25882/AT4G01870/AT4G10500/AT4G15610/AT4G32940/AT4G36040/AT5G24530/AT5G25930/AT5G44610/AT5G52310/AT5G62165/AT5G64940
GO:0010150	leaf senescence	748	AT2G20110	AT2G20110	NOVEL	23/1367	198/30167	3.55e-05	0.000840453	23	AT1G02390/AT1G30700/AT1G32450/AT1G76680/AT2G13810/AT2G34610/AT2G35980/AT2G44300/AT2G44480/AT2G46950/AT3G11340/AT3G60670/AT4G01870/AT4G02380/AT4G10500/AT4G15610/AT4G23810/AT4G36040/AT5G25930/AT5G37600/AT5G44610/AT5G52310/AT5G62165
GO:0010150	leaf senescence	749	AT5G03740	HD2C,HDT3	NOVEL	24/1371	198/30167	1.25e-05	0.000375139	24	AT1G01680/AT1G02390/AT1G11190/AT1G32450/AT1G54570/AT1G69490/AT1G76680/AT2G44300/AT2G44480/AT2G46950/AT3G25882/AT3G60670/AT4G01870/AT4G02380/AT4G10500/AT4G12735/AT4G15610/AT4G32940/AT5G24530/AT5G25930/AT5G37600/AT5G44610/AT5G52310/AT5G62165
GO:0010150	leaf senescence	750	AT4G17750	ATHSF1,ATHSFA1A,HSF1,HSFA1A	NOVEL	28/1380	198/30167	1.17e-07	3.39e-06	28	AT1G01680/AT1G02390/AT1G11190/AT1G30700/AT1G32450/AT1G36622/AT1G69490/AT1G76680/AT2G13810/AT2G18690/AT2G22300/AT2G25460/AT2G39200/AT2G44300/AT2G46950/AT3G11340/AT3G14060/AT3G25882/AT3G50760/AT4G01870/AT4G10500/AT4G15610/AT4G23810/AT5G25930/AT5G44160/AT5G44610/AT5G52310/AT5G62165
GO:0010150	leaf senescence	751	AT1G32870	ANAC013,ANAC13,NAC13	NOVEL	26/1368	198/30167	1.18e-06	3.3e-05	26	AT1G02390/AT1G11190/AT1G30700/AT1G32450/AT1G73500/AT1G76680/AT2G25460/AT2G31570/AT2G35980/AT2G44300/AT2G46950/AT3G22910/AT4G01870/AT4G02380/AT4G03550/AT4G10500/AT4G12735/AT4G15610/AT4G32940/AT4G36040/AT5G24530/AT5G25930/AT5G37600/AT5G44610/AT5G52310/AT5G63130
GO:0010150	leaf senescence	752	AT2G43280	AT2G43280	NOVEL	21/1366	198/30167	0.000272055	0.00360858	21	AT1G01680/AT1G02390/AT1G30700/AT1G32450/AT1G54570/AT1G69490/AT1G76680/AT2G44300/AT2G46950/AT3G11340/AT3G25882/AT4G01870/AT4G10500/AT4G32940/AT5G24530/AT5G25930/AT5G44610/AT5G52310/AT5G56870/AT5G62000/AT5G62165
GO:0010150	leaf senescence	753	AT1G03970	GBF4	NOVEL	35/1371	198/30167	4.95e-12	2.07e-10	35	AT1G02390/AT1G11190/AT1G21000/AT1G30700/AT1G32450/AT1G54570/AT1G73500/AT1G76680/AT2G18690/AT2G25460/AT2G30550/AT2G31570/AT2G39730/AT2G44300/AT2G46950/AT3G07350/AT3G11340/AT3G25882/AT3G56400/AT4G01870/AT4G02380/AT4G10500/AT4G15610/AT4G23810/AT4G30490/AT4G32940/AT4G36040/AT5G24530/AT5G25930/AT5G37600/AT5G44610/AT5G52310/AT5G59220/AT5G62165/AT5G63130
GO:0010150	leaf senescence	754	AT1G35460	CFLAP2,FBH1	NOVEL	27/1363	198/30167	3.23e-07	1.1e-05	27	AT1G01680/AT1G02390/AT1G11190/AT1G30700/AT1G32450/AT1G54570/AT1G64140/AT1G76680/AT2G18690/AT2G22300/AT2G31570/AT2G44300/AT2G46950/AT3G11340/AT3G25882/AT4G01870/AT4G02380/AT4G10500/AT4G15610/AT4G32940/AT5G24530/AT5G25930/AT5G37600/AT5G44610/AT5G52310/AT5G62000/AT5G62165
GO:0010150	leaf senescence	755	AT5G42780	AT5G42780	NOVEL	21/1357	198/30167	0.000249065	0.00422252	21	AT1G11190/AT1G32450/AT1G69490/AT1G73220/AT1G76680/AT2G13810/AT2G22300/AT2G34610/AT2G44300/AT2G46950/AT3G11340/AT3G14060/AT4G01870/AT4G02380/AT4G32940/AT5G24530/AT5G44160/AT5G44610/AT5G52300/AT5G52310/AT5G56870
GO:0010150	leaf senescence	756	AT1G18710	AtMYB47,MYB47	NOVEL	26/1361	198/30167	1.07e-06	4.46e-05	26	AT1G02390/AT1G32450/AT1G54040/AT1G54130/AT1G69490/AT1G73500/AT1G76680/AT2G22300/AT2G25460/AT2G39730/AT2G46950/AT3G10985/AT3G25882/AT3G56400/AT4G02380/AT4G10500/AT4G23810/AT4G32940/AT4G36040/AT5G24530/AT5G25930/AT5G37600/AT5G52310/AT5G62000/AT5G63130/AT5G64940
GO:0010150	leaf senescence	757	AT2G46510	AIB,ATAIB,bHLH017,bHLH17,JAM1	NOVEL	32/1369	198/30167	4.22e-10	1.89e-08	32	AT1G02390/AT1G11190/AT1G21000/AT1G30700/AT1G32450/AT1G66880/AT1G69490/AT1G73500/AT1G76680/AT2G18690/AT2G25460/AT2G31570/AT2G44300/AT2G44480/AT2G46950/AT3G07350/AT3G22910/AT3G25882/AT3G52430/AT3G56400/AT4G01870/AT4G02380/AT4G10500/AT4G14365/AT4G23810/AT4G36040/AT5G24530/AT5G25930/AT5G37600/AT5G44610/AT5G52310/AT5G59220
GO:0010150	leaf senescence	758	AT2G46970	PIL1	NOVEL	19/1338	198/30167	0.00136482	0.0339744	19	AT1G01680/AT1G11190/AT1G32450/AT1G73500/AT1G76680/AT2G13810/AT2G35980/AT2G43000/AT3G05400/AT3G25882/AT3G60670/AT4G10500/AT4G12735/AT4G18980/AT4G32940/AT5G25930/AT5G52310/AT5G56870/AT5G62165
GO:0010150	leaf senescence	759	AT2G02820	AtMYB88,MYB88	NOVEL	23/1359	198/30167	3.24e-05	0.000497465	23	AT1G01680/AT1G02390/AT1G11190/AT1G30700/AT1G32450/AT1G54570/AT1G76680/AT2G25460/AT2G44300/AT2G46950/AT3G07350/AT3G11340/AT3G56400/AT4G01870/AT4G02380/AT4G15610/AT4G23810/AT4G32940/AT5G03280/AT5G24530/AT5G25930/AT5G52310/AT5G62165
GO:0010150	leaf senescence	760	AT1G18835	MIF3	NOVEL	30/1346	198/30167	4.75e-09	3.7e-07	30	AT1G02390/AT1G11190/AT1G30700/AT1G32450/AT1G69490/AT1G73220/AT1G76680/AT2G18690/AT2G25460/AT2G31570/AT2G37750/AT2G39200/AT2G44300/AT3G07350/AT3G25882/AT3G26210/AT4G01250/AT4G01870/AT4G02380/AT4G10500/AT4G15610/AT4G23810/AT4G30490/AT4G36040/AT5G24110/AT5G24530/AT5G37600/AT5G44610/AT5G52310/AT5G56870
GO:0010150	leaf senescence	761	AT3G21270	ADOF2,DOF2	NOVEL	21/1360	198/30167	0.000256531	0.00304264	21	AT1G02390/AT1G11190/AT1G18210/AT1G21000/AT1G30700/AT1G32450/AT1G73500/AT1G76980/AT2G39200/AT2G44300/AT2G46950/AT3G11340/AT4G01870/AT4G02380/AT4G10500/AT4G15610/AT4G32940/AT4G36040/AT5G37600/AT5G52310/AT5G56870
GO:0010150	leaf senescence	762	AT1G53170	ATERF-8,ATERF8,ERF8	NOVEL	35/1355	198/30167	3.56e-12	1.99e-10	35	AT1G02390/AT1G11190/AT1G21000/AT1G30700/AT1G32450/AT1G54570/AT1G73500/AT1G76680/AT1G76980/AT2G18690/AT2G25460/AT2G31570/AT2G37750/AT2G44300/AT2G46950/AT3G07350/AT3G11340/AT3G25882/AT3G56400/AT4G01870/AT4G02380/AT4G10500/AT4G15610/AT4G23810/AT4G32940/AT4G36040/AT5G24110/AT5G24530/AT5G25930/AT5G37600/AT5G44610/AT5G52310/AT5G62000/AT5G62165/AT5G63130
GO:0010150	leaf senescence	763	AT1G72650	TRFL6	NOVEL	27/1358	198/30167	3e-07	7.68e-06	27	AT1G02390/AT1G11190/AT1G21000/AT1G30700/AT1G32450/AT1G69490/AT1G73500/AT1G76680/AT2G18690/AT2G31570/AT2G37750/AT2G44300/AT2G46950/AT3G25882/AT3G56400/AT4G01870/AT4G02380/AT4G15610/AT4G23810/AT4G32940/AT4G36040/AT5G24530/AT5G25930/AT5G37600/AT5G44610/AT5G52310/AT5G62000
GO:0010150	leaf senescence	764	AT2G27470	NF-YB11	NOVEL	21/1347	198/30167	0.000225542	0.00294025	21	AT1G02390/AT1G31040/AT1G32450/AT1G73220/AT1G76680/AT2G25460/AT2G31570/AT2G44300/AT2G46950/AT3G60670/AT4G01870/AT4G02380/AT4G15610/AT4G32940/AT4G36040/AT5G24110/AT5G24530/AT5G25930/AT5G37600/AT5G52310/AT5G62165
GO:0010150	leaf senescence	765	AT2G28350	ARF10	NOVEL	23/1342	198/30167	2.67e-05	0.000477065	23	AT1G02390/AT1G11190/AT1G30700/AT1G32450/AT1G76680/AT2G25460/AT2G31570/AT2G44300/AT2G46950/AT3G11340/AT4G01870/AT4G02380/AT4G10500/AT4G15610/AT4G30490/AT4G32940/AT4G36040/AT5G24110/AT5G24530/AT5G25930/AT5G37600/AT5G44610/AT5G52310
GO:0010150	leaf senescence	766	AT4G09180	FBH2	NOVEL	26/1348	198/30167	8.99e-07	2.02e-05	26	AT1G02390/AT1G11190/AT1G30700/AT1G32450/AT1G54130/AT1G54570/AT1G76680/AT2G22300/AT2G25460/AT2G31570/AT2G39200/AT2G44300/AT2G46950/AT3G11340/AT4G01870/AT4G02380/AT4G15610/AT4G23810/AT4G32940/AT4G36040/AT5G24530/AT5G25930/AT5G37600/AT5G44610/AT5G52310/AT5G62165
GO:0010150	leaf senescence	767	AT2G36960	TKI1	NOVEL	27/1348	198/30167	2.6e-07	8.84e-06	27	AT1G01680/AT1G02390/AT1G30700/AT1G32450/AT1G54570/AT1G76680/AT2G13810/AT2G31570/AT2G35980/AT2G39200/AT2G44300/AT2G46950/AT3G05400/AT3G11340/AT3G25882/AT4G01870/AT4G02380/AT4G10500/AT4G15610/AT4G32940/AT5G24110/AT5G24530/AT5G25930/AT5G37600/AT5G44610/AT5G52310/AT5G62165
GO:0010150	leaf senescence	768	AT1G24625	ZFP7	NOVEL	20/1347	198/30167	0.000591567	0.00525671	20	AT1G01680/AT1G02390/AT1G20900/AT1G32450/AT1G54570/AT2G25460/AT2G39200/AT2G39730/AT2G44300/AT2G46950/AT3G11340/AT4G01870/AT4G02380/AT4G15610/AT4G32940/AT5G24530/AT5G25930/AT5G44610/AT5G52310/AT5G62165
GO:0010150	leaf senescence	769	AT4G02560	LD	NOVEL	20/1339	198/30167	0.000549289	0.00654569	20	AT1G01680/AT1G02390/AT1G11190/AT1G30700/AT1G32450/AT1G54570/AT1G76680/AT2G13810/AT2G39200/AT2G44300/AT2G46950/AT3G25882/AT4G01870/AT4G10500/AT4G32940/AT5G24530/AT5G25930/AT5G44610/AT5G52310/AT5G62165
GO:0010150	leaf senescence	770	AT5G64220	CAMTA2	NOVEL	27/1339	198/30167	2.28e-07	7.63e-06	27	AT1G01680/AT1G02390/AT1G11190/AT1G30700/AT1G32450/AT1G54570/AT1G76680/AT2G22300/AT2G31570/AT2G35980/AT2G39200/AT2G44300/AT2G46950/AT3G11340/AT3G25882/AT4G01870/AT4G02380/AT4G10500/AT4G15610/AT4G32940/AT5G03280/AT5G24530/AT5G25930/AT5G37600/AT5G44610/AT5G52310/AT5G62165
GO:0010150	leaf senescence	771	AT4G01280	AT4G01280	NOVEL	24/1343	198/30167	8.88e-06	0.000161199	24	AT1G02390/AT1G32450/AT1G54570/AT1G76680/AT2G22300/AT2G31570/AT2G39200/AT2G44300/AT2G46950/AT3G11340/AT3G25882/AT3G56400/AT4G01870/AT4G02380/AT4G10500/AT4G15610/AT4G23810/AT4G32940/AT5G24530/AT5G25930/AT5G37600/AT5G44610/AT5G52310/AT5G62165
GO:0010150	leaf senescence	772	AT3G55980	ATSZF1,SZF1,TZF11	NOVEL	33/1346	198/30167	6.32e-11	3.17e-09	33	AT1G02390/AT1G11190/AT1G21000/AT1G30700/AT1G32450/AT1G73500/AT1G76680/AT2G18690/AT2G22300/AT2G25460/AT2G31570/AT2G37750/AT2G44300/AT2G44480/AT2G46950/AT3G22910/AT3G25882/AT3G52430/AT3G56400/AT4G01870/AT4G02380/AT4G10500/AT4G14365/AT4G15610/AT4G23810/AT4G32940/AT5G24530/AT5G25930/AT5G37600/AT5G52310/AT5G59220/AT5G62000/AT5G63130
GO:0010150	leaf senescence	773	AT5G01200	AT5G01200	NOVEL	25/1341	198/30167	2.72e-06	8.24e-05	25	AT1G11190/AT1G30700/AT1G32450/AT1G66830/AT1G73500/AT1G76680/AT2G25460/AT2G34610/AT2G44480/AT3G05400/AT3G10985/AT3G14060/AT3G25882/AT4G01870/AT4G02380/AT4G12735/AT4G15610/AT4G23810/AT4G32940/AT4G36040/AT5G37600/AT5G44160/AT5G52310/AT5G56870/AT5G62165
GO:0010150	leaf senescence	774	AT1G80010	FRS8	NOVEL	22/1336	198/30167	7.26e-05	0.00111009	22	AT1G01680/AT1G02390/AT1G11190/AT1G32450/AT1G54570/AT1G76680/AT2G13810/AT2G31570/AT2G35980/AT2G44300/AT2G46950/AT3G25882/AT4G01870/AT4G02380/AT4G10500/AT4G15610/AT4G32940/AT5G24530/AT5G25930/AT5G44610/AT5G52310/AT5G62165
GO:0010150	leaf senescence	775	AT5G08520	MYBS2	NOVEL	21/1339	198/30167	0.000208157	0.00248378	21	AT1G02390/AT1G30700/AT1G32450/AT1G54570/AT1G69490/AT1G73500/AT1G76680/AT2G39200/AT2G44300/AT2G46950/AT4G01870/AT4G02380/AT4G15610/AT4G23810/AT4G32940/AT4G36040/AT5G24530/AT5G25930/AT5G44610/AT5G52310/AT5G62165
GO:0010150	leaf senescence	776	AT3G58710	ATWRKY69,WRKY69	NOVEL	21/1342	198/30167	0.000214533	0.00221474	21	AT1G02390/AT1G30700/AT1G32450/AT1G54570/AT1G73500/AT1G76680/AT2G25460/AT2G31570/AT2G35980/AT2G44300/AT2G46950/AT4G01870/AT4G02380/AT4G15610/AT4G23810/AT4G32940/AT5G25930/AT5G44610/AT5G52310/AT5G62165/AT5G63130
GO:0010150	leaf senescence	777	AT2G22850	AtbZIP6,bZIP6	NOVEL	22/1336	198/30167	7.26e-05	0.00103145	22	AT1G01680/AT1G02390/AT1G30700/AT1G32450/AT1G73500/AT2G22300/AT2G25460/AT2G37750/AT2G39200/AT2G44300/AT2G46950/AT3G25882/AT4G01870/AT4G02380/AT4G10500/AT4G15610/AT4G23810/AT5G24530/AT5G25930/AT5G52310/AT5G56870/AT5G64940
GO:0010150	leaf senescence	778	AT5G47230	ATERF-5,ATERF5,AtMACD1,ERF102,ERF5	NOVEL	28/1334	198/30167	5.81e-08	1.8e-06	28	AT1G02390/AT1G21000/AT1G30700/AT1G32450/AT1G73500/AT1G76680/AT2G18690/AT2G22300/AT2G25460/AT2G44300/AT2G44480/AT2G46950/AT3G25882/AT3G56400/AT4G01870/AT4G02380/AT4G10500/AT4G14365/AT4G15610/AT4G23810/AT4G32940/AT5G24110/AT5G24530/AT5G25930/AT5G52310/AT5G59220/AT5G62165/AT5G63130
GO:0010150	leaf senescence	779	AT4G09460	AtMYB6,MYB6	NOVEL	28/1333	198/30167	5.72e-08	1.58e-06	28	AT1G02390/AT1G11190/AT1G30700/AT1G32450/AT1G54570/AT1G76680/AT2G25460/AT2G30550/AT2G31570/AT2G44300/AT2G46950/AT3G07350/AT3G11340/AT3G25882/AT3G56400/AT4G01870/AT4G02380/AT4G10500/AT4G15610/AT4G23810/AT4G36040/AT5G24110/AT5G24530/AT5G25930/AT5G37600/AT5G44610/AT5G52310/AT5G62165
GO:0010150	leaf senescence	780	AT3G19580	AZF2,ZF2	NOVEL	34/1325	198/30167	9.08e-12	5e-10	34	AT1G02390/AT1G11190/AT1G30700/AT1G32450/AT1G54130/AT1G66880/AT1G69490/AT1G73500/AT2G18690/AT2G22300/AT2G25460/AT2G30550/AT2G31570/AT2G44300/AT2G46950/AT3G14060/AT3G25882/AT3G52430/AT3G56400/AT4G01870/AT4G02380/AT4G10500/AT4G14365/AT4G15610/AT4G23810/AT4G32940/AT5G03280/AT5G24530/AT5G25930/AT5G37600/AT5G44610/AT5G52310/AT5G59220/AT5G62165
GO:0010150	leaf senescence	781	AT4G00270	GeBP,STKR1	NOVEL	24/1323	198/30167	6.92e-06	0.000118447	24	AT1G02390/AT1G11190/AT1G30700/AT1G31040/AT1G32450/AT1G69490/AT1G73500/AT1G76680/AT2G25460/AT2G31570/AT2G44300/AT2G46950/AT4G01870/AT4G02380/AT4G10500/AT4G15610/AT4G32940/AT4G36040/AT5G24530/AT5G25930/AT5G37600/AT5G44610/AT5G52310/AT5G59220
GO:0010150	leaf senescence	782	AT3G16940	CAMTA6	NOVEL	22/1323	198/30167	6.3e-05	0.000899892	22	AT1G02390/AT1G30700/AT1G32450/AT1G36622/AT1G54570/AT1G76680/AT2G13810/AT2G31570/AT2G44300/AT2G46950/AT3G25882/AT3G56400/AT4G01870/AT4G23810/AT4G32940/AT5G24110/AT5G24530/AT5G25930/AT5G37600/AT5G44610/AT5G52310/AT5G62165
GO:0010150	leaf senescence	783	AT2G03340	WRKY3	NOVEL	20/1325	198/30167	0.000481599	0.00489918	20	AT1G01680/AT1G02390/AT1G30700/AT1G32450/AT1G54570/AT1G76680/AT2G39200/AT2G44300/AT2G46950/AT3G25882/AT4G01870/AT4G10500/AT4G15610/AT4G32940/AT4G36040/AT5G24530/AT5G25930/AT5G44610/AT5G52310/AT5G62165
GO:0010150	leaf senescence	784	AT4G29100	bhlh68	NOVEL	19/1316	198/30167	0.00112735	0.0125798	19	AT1G01680/AT1G30700/AT1G32450/AT1G54130/AT1G54570/AT1G76680/AT2G22300/AT2G46950/AT3G11340/AT3G25882/AT4G10500/AT4G32940/AT5G24530/AT5G25930/AT5G44610/AT5G52310/AT5G62000/AT5G62165/AT5G64940
GO:0010150	leaf senescence	785	AT2G47260	ATWRKY23,WRKY23	NOVEL	18/1317	198/30167	0.00274728	0.0237355	18	AT1G02390/AT1G30700/AT1G32450/AT1G76680/AT2G25460/AT2G31570/AT2G34610/AT2G44300/AT2G46950/AT3G22910/AT3G25882/AT4G01870/AT4G02380/AT4G15610/AT4G23810/AT5G25930/AT5G44610/AT5G52310
GO:0010150	leaf senescence	786	AT1G59750	ARF1	KNOWN	23/1319	198/30167	2.04e-05	0.000325663	23	AT1G02390/AT1G11190/AT1G30700/AT1G32450/AT1G73500/AT1G76680/AT2G25460/AT2G31570/AT2G39200/AT2G44300/AT2G46950/AT3G25882/AT4G01870/AT4G02380/AT4G15610/AT4G32940/AT4G36040/AT5G03280/AT5G24530/AT5G25930/AT5G37600/AT5G44610/AT5G52310
GO:0010150	leaf senescence	787	AT2G47890	AT2G47890	NOVEL	22/1314	198/30167	5.7e-05	0.000871527	22	AT1G02390/AT1G30700/AT1G32450/AT1G54570/AT1G76680/AT2G25460/AT2G44300/AT2G46950/AT3G07350/AT3G56400/AT4G01870/AT4G02380/AT4G10500/AT4G15610/AT4G23810/AT4G32940/AT5G24110/AT5G24530/AT5G25930/AT5G44610/AT5G52310/AT5G62165
GO:0010150	leaf senescence	788	AT3G26744	ATICE1,ICE1,SCRM	NOVEL	21/1316	198/30167	0.000164581	0.00187409	21	AT1G01680/AT1G02390/AT1G32450/AT1G54570/AT1G69490/AT1G76680/AT2G13810/AT2G22300/AT2G44300/AT2G46950/AT3G11340/AT3G25882/AT4G01870/AT4G02380/AT4G15610/AT4G32940/AT5G24530/AT5G25930/AT5G52310/AT5G62000/AT5G62165
GO:0010150	leaf senescence	789	AT4G36710	AtHAM4,HAM4,SCL15	NOVEL	26/1308	198/30167	5.11e-07	1.48e-05	26	AT1G02390/AT1G21000/AT1G30700/AT1G32450/AT1G54570/AT1G73500/AT2G18690/AT2G25460/AT2G34610/AT2G44300/AT2G46950/AT3G10985/AT3G11340/AT3G22910/AT3G56400/AT3G60670/AT4G01870/AT4G02380/AT4G32940/AT4G36040/AT5G24530/AT5G44160/AT5G44610/AT5G52310/AT5G59220/AT5G64940
GO:0010150	leaf senescence	790	AT5G18960	FRS12	NOVEL	19/1311	198/30167	0.00107861	0.0108016	19	AT1G01680/AT1G02390/AT1G30700/AT1G32450/AT1G54570/AT1G76680/AT2G35980/AT2G44300/AT2G46950/AT3G11340/AT4G01870/AT4G10500/AT4G32940/AT5G24530/AT5G25930/AT5G37600/AT5G44610/AT5G52310/AT5G62165
GO:0010150	leaf senescence	791	AT5G28770	AtbZIP63,BZO2H3	NOVEL	29/1310	198/30167	1.03e-08	3.51e-07	29	AT1G02390/AT1G11190/AT1G30700/AT1G32450/AT1G54130/AT1G54570/AT1G69490/AT1G76680/AT2G18690/AT2G25460/AT2G31570/AT2G44300/AT2G46950/AT3G11340/AT3G25882/AT3G52430/AT3G56400/AT4G01870/AT4G02380/AT4G10500/AT4G15610/AT4G23810/AT4G32940/AT4G36040/AT5G24530/AT5G37600/AT5G44610/AT5G52310/AT5G62000
GO:0010150	leaf senescence	792	AT4G16110	ARR2,RR2	KNOWN	20/1309	198/30167	0.000413242	0.004325	20	AT1G02390/AT1G11190/AT1G30700/AT1G32450/AT1G54570/AT1G76680/AT2G44300/AT2G46950/AT3G25882/AT4G01870/AT4G02380/AT4G10500/AT4G15610/AT4G32940/AT5G24110/AT5G24530/AT5G25930/AT5G37600/AT5G44610/AT5G52310
GO:0010150	leaf senescence	793	AT3G06740	GATA15	NOVEL	19/1318	198/30167	0.00114736	0.0107556	19	AT1G02390/AT1G30700/AT1G32450/AT1G73500/AT1G76680/AT2G25460/AT2G31570/AT2G44300/AT2G46950/AT3G11340/AT4G01870/AT4G02380/AT4G15610/AT4G23810/AT4G32940/AT5G24530/AT5G37600/AT5G52310/AT5G62165
GO:0010150	leaf senescence	794	AT3G57800	AT3G57800	NOVEL	22/1303	198/30167	5.04e-05	0.000721064	22	AT1G02390/AT1G30700/AT1G32450/AT1G54570/AT1G76680/AT2G31570/AT2G39200/AT2G44300/AT2G46950/AT3G25882/AT4G01870/AT4G02380/AT4G10500/AT4G32940/AT4G36040/AT5G24530/AT5G25930/AT5G37600/AT5G44610/AT5G52310/AT5G62165/AT5G64940
GO:0010150	leaf senescence	795	AT4G12850	AT4G12850	NOVEL	32/1302	198/30167	1.2e-10	5.64e-09	32	AT1G02390/AT1G30700/AT1G32450/AT1G54130/AT1G73220/AT1G73500/AT1G76680/AT2G18690/AT2G25460/AT2G31570/AT2G34610/AT2G39200/AT2G44300/AT2G46950/AT3G05400/AT3G11340/AT3G56400/AT4G01250/AT4G01870/AT4G02380/AT4G10500/AT4G15610/AT4G23810/AT4G32940/AT4G36040/AT5G24110/AT5G24530/AT5G25930/AT5G37600/AT5G44610/AT5G52310/AT5G62165
GO:0010150	leaf senescence	796	AT1G25580	AT1G25580	NOVEL	25/1307	198/30167	1.72e-06	4.01e-05	25	AT1G02390/AT1G08050/AT1G30700/AT1G32450/AT1G54570/AT1G69490/AT1G76680/AT2G39200/AT2G44300/AT2G46950/AT3G11340/AT3G25882/AT4G01870/AT4G02380/AT4G10500/AT4G15610/AT4G32940/AT4G36040/AT5G24530/AT5G25930/AT5G44160/AT5G44610/AT5G52310/AT5G62165/AT5G64940
GO:0010150	leaf senescence	797	AT1G19350	BES1,BZR2	NOVEL	19/1302	198/30167	0.000995442	0.00782779	19	AT1G02390/AT1G32450/AT1G54570/AT1G69490/AT1G76680/AT2G22300/AT2G31570/AT2G44300/AT2G46950/AT3G25882/AT4G01870/AT4G15610/AT4G32940/AT5G24530/AT5G25930/AT5G37600/AT5G44610/AT5G52310/AT5G62165
GO:0010150	leaf senescence	798	AT1G69570	CDF5	NOVEL	21/1300	198/30167	0.000139234	0.00317992	21	AT1G11190/AT1G21000/AT1G32450/AT1G73500/AT1G76680/AT2G13810/AT2G44300/AT2G46950/AT3G11340/AT3G22910/AT3G25010/AT3G56400/AT4G01870/AT4G02380/AT4G10500/AT4G18980/AT4G23810/AT4G32940/AT4G36040/AT5G52310/AT5G56870
GO:0010150	leaf senescence	799	AT1G78700	BEH4	NOVEL	23/1299	198/30167	1.6e-05	0.000260217	23	AT1G01680/AT1G02390/AT1G30700/AT1G32450/AT1G54570/AT1G76680/AT2G22300/AT2G25460/AT2G44300/AT2G46950/AT3G05400/AT3G25010/AT3G25882/AT4G01870/AT4G02380/AT4G15610/AT4G23810/AT4G32940/AT5G24530/AT5G25930/AT5G44610/AT5G52310/AT5G62165
GO:0010150	leaf senescence	800	AT5G04240	ELF6	NOVEL	24/1292	198/30167	4.65e-06	0.000109187	24	AT1G02390/AT1G11190/AT1G30700/AT1G32450/AT1G54570/AT1G76680/AT2G22300/AT2G35980/AT2G44300/AT2G44480/AT2G46950/AT3G11340/AT3G25882/AT4G01870/AT4G02380/AT4G15610/AT4G32940/AT4G36040/AT5G24530/AT5G25930/AT5G37600/AT5G44610/AT5G52310/AT5G62165
GO:0010150	leaf senescence	801	AT2G47850	AT2G47850	NOVEL	24/1299	198/30167	5.09e-06	0.000102722	24	AT1G01680/AT1G02390/AT1G30700/AT1G32450/AT1G54570/AT1G69490/AT1G76680/AT2G25460/AT2G39200/AT2G39730/AT2G44300/AT2G46950/AT3G05400/AT3G25882/AT4G01870/AT4G02380/AT4G15610/AT4G32940/AT4G36040/AT5G24530/AT5G25930/AT5G44610/AT5G52310/AT5G62165
GO:0010150	leaf senescence	802	AT1G69010	BIM2	NOVEL	27/1293	198/30167	1.14e-07	3.15e-06	27	AT1G02390/AT1G30700/AT1G32450/AT1G54570/AT1G69490/AT1G76680/AT2G18690/AT2G25460/AT2G31570/AT2G39200/AT2G44300/AT2G46950/AT3G25882/AT3G56400/AT4G01870/AT4G02380/AT4G10500/AT4G15610/AT4G23810/AT4G32940/AT4G36040/AT5G24530/AT5G25930/AT5G37600/AT5G44610/AT5G52310/AT5G62165
GO:0010150	leaf senescence	803	AT5G44180	RLT2	NOVEL	26/1284	198/30167	3.6e-07	1.3e-05	26	AT1G02390/AT1G11190/AT1G30700/AT1G32450/AT1G76680/AT2G22300/AT2G25460/AT2G44300/AT2G46950/AT3G05400/AT3G11340/AT3G25010/AT3G25882/AT3G60670/AT4G01870/AT4G02380/AT4G10500/AT4G15610/AT4G32940/AT5G03280/AT5G24530/AT5G25930/AT5G37600/AT5G44610/AT5G52310/AT5G62165
GO:0010150	leaf senescence	804	AT4G17880	MYC4	NOVEL	22/1285	198/30167	4.1e-05	0.000555746	22	AT1G02390/AT1G11190/AT1G32450/AT1G54570/AT1G73500/AT2G31570/AT2G44300/AT2G46950/AT3G56400/AT4G01870/AT4G02380/AT4G10500/AT4G15610/AT4G23810/AT4G32940/AT4G36040/AT5G24530/AT5G25930/AT5G37600/AT5G44610/AT5G52310/AT5G56870
GO:0010150	leaf senescence	805	AT4G36900	DEAR4,RAP2.10	NOVEL	30/1291	198/30167	1.82e-09	7.25e-08	30	AT1G02390/AT1G11190/AT1G21000/AT1G30700/AT1G32450/AT1G66880/AT1G73500/AT1G76680/AT2G18690/AT2G25460/AT2G25625/AT2G31570/AT2G37750/AT2G39200/AT2G44300/AT2G44480/AT3G07350/AT3G52430/AT3G56400/AT4G01870/AT4G02380/AT4G10500/AT4G14365/AT4G15610/AT4G23810/AT4G36040/AT5G24530/AT5G25930/AT5G44610/AT5G52310
GO:0010150	leaf senescence	806	AT4G24240	ATWRKY7,WRKY7	NOVEL	22/1278	198/30167	3.78e-05	0.000524088	22	AT1G02390/AT1G30700/AT1G32450/AT1G76680/AT2G25460/AT2G31570/AT2G35980/AT2G39200/AT2G44300/AT2G44480/AT2G46950/AT3G11340/AT4G01870/AT4G02380/AT4G10500/AT4G15610/AT4G32940/AT5G24530/AT5G37600/AT5G44610/AT5G52310/AT5G63130
GO:0010150	leaf senescence	807	AT5G40880	AT5G40880	NOVEL	28/1280	198/30167	2.44e-08	7.08e-07	28	AT1G02390/AT1G11190/AT1G21000/AT1G30700/AT1G32450/AT1G54570/AT2G18690/AT2G25460/AT2G31570/AT2G35980/AT2G37750/AT2G39200/AT2G44300/AT2G46950/AT3G11340/AT4G01870/AT4G02380/AT4G10500/AT4G15610/AT4G23810/AT4G32940/AT5G24530/AT5G25930/AT5G37600/AT5G44610/AT5G52310/AT5G62165/AT5G63130
GO:0010150	leaf senescence	808	AT5G60200	DOF5.3,TMO6	NOVEL	18/1271	198/30167	0.00187684	0.0177674	18	AT1G02390/AT1G11190/AT1G30700/AT1G32450/AT1G54570/AT2G25460/AT2G34610/AT2G44300/AT2G46950/AT3G11340/AT3G25882/AT3G60670/AT4G01870/AT4G02380/AT4G15610/AT5G44610/AT5G52310/AT5G59220
GO:0010150	leaf senescence	809	AT5G22220	ATE2FB,E2F1,E2FB	NOVEL	20/1267	198/30167	0.000272478	0.00281018	20	AT1G01680/AT1G02390/AT1G30700/AT1G32450/AT1G76680/AT2G22300/AT2G44300/AT2G46950/AT3G25010/AT3G60670/AT4G01870/AT4G02380/AT4G10500/AT4G32940/AT5G24110/AT5G25930/AT5G37600/AT5G44610/AT5G52310/AT5G62165
GO:0010150	leaf senescence	810	AT5G39660	CDF2	NOVEL	29/1276	198/30167	5.75e-09	2.28e-07	29	AT1G02390/AT1G11190/AT1G21000/AT1G30700/AT1G32450/AT1G69490/AT1G76680/AT2G18690/AT2G25460/AT2G31570/AT2G39200/AT2G39730/AT2G44300/AT2G44480/AT2G46950/AT3G56400/AT4G01870/AT4G02380/AT4G15610/AT4G23810/AT4G32940/AT5G24110/AT5G24530/AT5G25930/AT5G37600/AT5G44610/AT5G52310/AT5G59220/AT5G62165
GO:0010150	leaf senescence	811	AT1G18570	AtMYB51,BW51A,BW51B,HIG1,MYB51	NOVEL	28/1271	198/30167	2.11e-08	6.55e-07	28	AT1G01680/AT1G02390/AT1G30700/AT1G32450/AT1G73500/AT1G76680/AT2G18690/AT2G22300/AT2G25460/AT2G31570/AT2G35980/AT2G44300/AT2G44480/AT3G25882/AT3G56400/AT4G01870/AT4G02380/AT4G12735/AT4G14365/AT4G15610/AT4G23810/AT4G32940/AT4G36040/AT5G24530/AT5G25930/AT5G37600/AT5G52310/AT5G63130
GO:0010150	leaf senescence	812	AT4G24060	AT4G24060	NOVEL	17/1261	198/30167	0.00411008	0.0322032	17	AT1G01680/AT1G02390/AT1G30700/AT1G32450/AT1G54570/AT1G76680/AT2G25460/AT2G44300/AT3G11340/AT4G01870/AT4G02380/AT4G32940/AT5G24530/AT5G25930/AT5G44160/AT5G52310/AT5G63130
GO:0010150	leaf senescence	813	AT5G29000	PHL1	NOVEL	24/1259	198/30167	3e-06	6.47e-05	24	AT1G02390/AT1G30700/AT1G32450/AT1G54570/AT1G69490/AT1G76680/AT2G31570/AT2G39200/AT2G39730/AT2G44300/AT2G46950/AT3G11340/AT4G01870/AT4G02380/AT4G10500/AT4G15610/AT4G23810/AT4G32940/AT4G36040/AT5G24530/AT5G25930/AT5G44610/AT5G52310/AT5G62165
GO:0010150	leaf senescence	814	AT1G28420	HB-1,RLT1	NOVEL	24/1254	198/30167	2.8e-06	6.71e-05	24	AT1G01680/AT1G02390/AT1G30700/AT1G32450/AT1G54570/AT1G76680/AT2G25460/AT2G31570/AT2G35980/AT2G44300/AT2G46950/AT3G11340/AT3G25882/AT4G01870/AT4G10500/AT4G12735/AT4G15610/AT4G32940/AT5G24530/AT5G25930/AT5G37600/AT5G44610/AT5G52310/AT5G62165
GO:0010150	leaf senescence	815	AT4G13640	AT4G13640	NOVEL	26/1264	198/30167	2.67e-07	6.97e-06	26	AT1G02390/AT1G30700/AT1G32450/AT1G69490/AT1G73500/AT1G76680/AT2G18690/AT2G25460/AT2G31570/AT2G44300/AT2G46950/AT3G07350/AT3G11340/AT3G56400/AT4G01870/AT4G02380/AT4G10500/AT4G15610/AT4G23810/AT4G32940/AT4G36040/AT5G24530/AT5G25930/AT5G37600/AT5G52310/AT5G62165
GO:0010150	leaf senescence	816	AT5G58620	TZF9	NOVEL	25/1254	198/30167	8.2e-07	2.23e-05	25	AT1G02390/AT1G11190/AT1G21000/AT1G30700/AT1G32450/AT1G69490/AT1G76680/AT1G76980/AT2G25460/AT2G31570/AT2G37750/AT2G44300/AT2G46950/AT3G11340/AT3G14060/AT4G01870/AT4G02380/AT4G10500/AT4G15610/AT4G32940/AT5G24530/AT5G25930/AT5G44160/AT5G44610/AT5G52310
GO:0010150	leaf senescence	817	AT4G17460	HAT1,JAB	NOVEL	23/1261	198/30167	1e-05	0.000171255	23	AT1G02390/AT1G11190/AT1G30700/AT1G32450/AT1G73500/AT1G76680/AT2G25460/AT2G31570/AT2G44300/AT2G46950/AT3G07350/AT3G11340/AT3G56400/AT4G01870/AT4G02380/AT4G15610/AT4G23810/AT4G30490/AT4G32940/AT4G36040/AT5G24530/AT5G44610/AT5G52310
GO:0010150	leaf senescence	818	AT3G54320	ASML1,ATWRI1,WRI,WRI1	NOVEL	20/1249	198/30167	0.000226401	0.00390812	20	AT1G02390/AT1G20900/AT1G30700/AT1G31040/AT1G32450/AT1G76680/AT2G25460/AT2G34610/AT2G39200/AT2G44300/AT2G46950/AT3G05400/AT3G11340/AT4G01870/AT4G02380/AT4G15610/AT4G32940/AT5G44160/AT5G52310/AT5G62165
GO:0010150	leaf senescence	819	AT5G47660	AT5G47660	NOVEL	16/1250	198/30167	0.00855781	0.0487515	16	AT1G02390/AT1G30700/AT1G32450/AT1G69490/AT2G31570/AT2G44300/AT2G46950/AT4G01870/AT4G02380/AT4G15610/AT4G32940/AT5G24530/AT5G25930/AT5G37600/AT5G44610/AT5G52310
GO:0010150	leaf senescence	820	AT1G79700	WRI4	NOVEL	27/1238	198/30167	4.74e-08	1.68e-06	27	AT1G02390/AT1G20900/AT1G30700/AT1G32450/AT1G54130/AT1G54570/AT1G76680/AT2G25460/AT2G31570/AT2G37750/AT2G39200/AT2G44300/AT2G46950/AT3G11340/AT3G25882/AT3G56400/AT4G01870/AT4G02380/AT4G10500/AT4G15610/AT4G23810/AT4G32940/AT4G36040/AT5G25930/AT5G52310/AT5G56870/AT5G62165
GO:0010150	leaf senescence	821	AT5G60850	AtDOF5.4,OBP4	NOVEL	25/1238	198/30167	6.49e-07	1.78e-05	25	AT1G02390/AT1G30700/AT1G32450/AT1G54130/AT1G54570/AT1G76680/AT2G25460/AT2G44300/AT2G46950/AT3G11340/AT3G25882/AT3G56400/AT4G01870/AT4G02380/AT4G10500/AT4G23810/AT4G32940/AT5G24530/AT5G25930/AT5G37600/AT5G44610/AT5G52310/AT5G62000/AT5G62165/AT5G64940
GO:0010150	leaf senescence	822	AT2G28710	AT2G28710	NOVEL	26/1228	198/30167	1.53e-07	6.71e-06	26	AT1G01680/AT1G02390/AT1G32450/AT1G76680/AT2G13810/AT2G25460/AT2G31570/AT3G10985/AT3G25010/AT3G25882/AT4G01870/AT4G02380/AT4G10500/AT4G12735/AT4G15610/AT4G23810/AT4G30490/AT4G32940/AT4G36040/AT5G24110/AT5G24530/AT5G37600/AT5G52310/AT5G62165/AT5G63130/AT5G64940
GO:0010150	leaf senescence	823	AT1G01260	bHLH013,bHLH13,JAM2	NOVEL	24/1232	198/30167	2.07e-06	5.3e-05	24	AT1G02390/AT1G11190/AT1G30700/AT1G32450/AT1G76680/AT2G25460/AT2G31570/AT2G39200/AT2G44300/AT2G46950/AT3G11340/AT3G25882/AT4G01870/AT4G02380/AT4G10500/AT4G15610/AT4G23810/AT4G32940/AT5G24530/AT5G25930/AT5G37600/AT5G44610/AT5G52310/AT5G62165
GO:0010150	leaf senescence	824	AT1G05805	AKS2	NOVEL	29/1230	198/30167	2.54e-09	1.04e-07	29	AT1G02390/AT1G11190/AT1G30700/AT1G32450/AT1G54130/AT1G54570/AT1G69490/AT1G73500/AT1G76680/AT2G25460/AT2G39200/AT2G42540/AT2G44300/AT2G46950/AT3G07350/AT3G25882/AT3G56400/AT4G01250/AT4G01870/AT4G02380/AT4G15610/AT4G23810/AT4G32940/AT4G36040/AT5G24530/AT5G25930/AT5G37600/AT5G44610/AT5G52310
GO:0010150	leaf senescence	825	AT5G47370	HAT2	NOVEL	25/1231	198/30167	5.85e-07	1.46e-05	25	AT1G02390/AT1G11190/AT1G30700/AT1G32450/AT1G54570/AT1G73500/AT1G76680/AT2G25460/AT2G31570/AT2G44300/AT2G46950/AT3G07350/AT3G11340/AT3G25882/AT3G56400/AT4G01870/AT4G02380/AT4G15610/AT4G23810/AT4G32940/AT5G03280/AT5G24530/AT5G25930/AT5G44610/AT5G52310
GO:0010150	leaf senescence	826	AT4G38620	ATMYB4,MYB4	NOVEL	23/1218	198/30167	5.71e-06	0.000124218	23	AT1G02390/AT1G11190/AT1G30700/AT1G32450/AT1G54570/AT1G76680/AT2G25460/AT2G31570/AT2G44300/AT2G46950/AT3G11340/AT4G01870/AT4G02380/AT4G10500/AT4G15610/AT4G32940/AT5G24110/AT5G24530/AT5G44160/AT5G44610/AT5G52300/AT5G52310/AT5G56870
GO:0010150	leaf senescence	827	AT5G20730	ARF7,BIP,IAA21,IAA23,IAA25,MSG1,NPH4,TIR5	NOVEL	22/1223	198/30167	1.95e-05	0.000359981	22	AT1G01680/AT1G02390/AT1G30700/AT1G32450/AT1G54570/AT1G76680/AT2G13810/AT2G31570/AT2G44300/AT2G46950/AT3G25882/AT4G01870/AT4G02380/AT4G10500/AT4G15610/AT4G32940/AT5G24530/AT5G25930/AT5G37600/AT5G44610/AT5G52310/AT5G62165
GO:0010150	leaf senescence	828	AT5G08130	BIM1	NOVEL	21/1224	198/30167	6.01e-05	0.000743489	21	AT1G02390/AT1G11190/AT1G30700/AT1G32450/AT1G76680/AT2G25460/AT2G31570/AT2G44300/AT2G46950/AT3G25882/AT4G01870/AT4G02380/AT4G10500/AT4G15610/AT4G32940/AT5G24110/AT5G24530/AT5G25930/AT5G44610/AT5G52310/AT5G62165
GO:0010150	leaf senescence	829	AT2G32930	ZFN2	NOVEL	25/1216	198/30167	4.68e-07	1.19e-05	25	AT1G02390/AT1G11190/AT1G21000/AT1G30700/AT1G32450/AT1G73500/AT1G76680/AT1G76980/AT2G18690/AT2G25460/AT2G39200/AT2G43000/AT2G44300/AT2G46950/AT4G01870/AT4G02380/AT4G10500/AT4G15610/AT4G23810/AT4G36040/AT5G25930/AT5G37600/AT5G44610/AT5G52310/AT5G63130
GO:0010150	leaf senescence	830	AT1G67970	AT-HSFA8,ATHSFA8,HSFA8	NOVEL	28/1220	198/30167	8.8e-09	4.08e-07	28	AT1G01680/AT1G02390/AT1G30700/AT1G32450/AT1G34420/AT1G73500/AT1G76680/AT2G13810/AT2G18690/AT2G22300/AT2G25460/AT2G44300/AT2G44480/AT2G46950/AT3G25010/AT3G25882/AT3G56400/AT4G01870/AT4G02380/AT4G15610/AT4G23810/AT4G32940/AT4G36040/AT5G24530/AT5G25930/AT5G37600/AT5G52310/AT5G63130
GO:0010150	leaf senescence	831	AT5G45300	BAM8,BMY2	NOVEL	18/1214	198/30167	0.00113221	0.0101883	18	AT1G01680/AT1G02390/AT1G11190/AT1G32450/AT1G76680/AT2G31570/AT2G39200/AT2G44300/AT2G46950/AT3G11340/AT4G10500/AT4G32940/AT5G24530/AT5G25930/AT5G37600/AT5G44610/AT5G52310/AT5G62165
GO:0010150	leaf senescence	832	AT4G00238	AtSTKL1	NOVEL	16/1220	198/30167	0.00686596	0.045406	16	AT1G02390/AT1G30700/AT1G32450/AT1G69490/AT1G76680/AT2G44300/AT2G46950/AT3G11340/AT3G60670/AT4G01870/AT4G02380/AT4G15610/AT4G32940/AT5G24530/AT5G52310/AT5G62165
GO:0010150	leaf senescence	833	AT1G76890	AT-GT2,GT2	NOVEL	22/1208	198/30167	1.62e-05	0.000271815	22	AT1G02390/AT1G08050/AT1G11190/AT1G30700/AT1G32450/AT1G54570/AT1G76680/AT2G25460/AT2G31570/AT2G35980/AT2G44300/AT3G11340/AT3G14060/AT4G01870/AT4G02380/AT4G15610/AT5G03280/AT5G24530/AT5G44610/AT5G52310/AT5G59220/AT5G62165
GO:0010150	leaf senescence	834	AT5G15210	ATHB30,HB30,ZFHD3,ZHD8	NOVEL	26/1212	198/30167	1.19e-07	3.55e-06	26	AT1G01680/AT1G02390/AT1G11190/AT1G30700/AT1G32450/AT1G73500/AT1G76680/AT2G25460/AT2G44300/AT2G46950/AT3G11340/AT4G01870/AT4G02380/AT4G03550/AT4G10500/AT4G15610/AT4G23810/AT4G32940/AT4G36040/AT5G03280/AT5G24110/AT5G24530/AT5G25930/AT5G37600/AT5G44610/AT5G52310
GO:0010150	leaf senescence	835	AT3G24860	AT3G24860	NOVEL	22/1209	198/30167	1.64e-05	0.000323657	22	AT1G02390/AT1G30700/AT1G32450/AT1G69490/AT1G76680/AT1G76980/AT2G31570/AT2G44300/AT2G46950/AT3G11340/AT3G25882/AT4G01870/AT4G02380/AT4G10500/AT4G15610/AT4G32940/AT5G24530/AT5G25930/AT5G37600/AT5G44610/AT5G52310/AT5G62165
GO:0010150	leaf senescence	836	AT2G30470	HSI2,VAL1	NOVEL	17/1200	198/30167	0.00249285	0.0193763	17	AT1G02390/AT1G32450/AT1G76680/AT2G31570/AT2G44300/AT2G46950/AT3G25882/AT4G01870/AT4G02380/AT4G10500/AT4G32940/AT5G24530/AT5G25930/AT5G37600/AT5G44610/AT5G52310/AT5G62165
GO:0010150	leaf senescence	837	AT1G09530	PAP3,PIF3,POC1	NOVEL	17/1189	198/30167	0.00226749	0.0248007	17	AT1G02390/AT1G18210/AT1G32450/AT1G73500/AT1G76680/AT2G25460/AT2G34610/AT2G44300/AT2G46950/AT3G05400/AT3G10985/AT3G60670/AT4G01870/AT4G02380/AT5G44610/AT5G52310/AT5G62165
GO:0010150	leaf senescence	838	AT3G27010	AT-TCP20,ATTCP20,PCF1,TCP20	NOVEL	19/1202	198/30167	0.000382433	0.00437886	19	AT1G02390/AT1G32450/AT1G54570/AT1G76680/AT2G31570/AT2G44300/AT2G46950/AT4G01870/AT4G02380/AT4G15610/AT4G23810/AT4G32940/AT4G36040/AT5G24530/AT5G25930/AT5G37600/AT5G44610/AT5G52310/AT5G62165
GO:0010150	leaf senescence	839	AT4G37790	ABIG1,HAT22	NOVEL	22/1200	198/30167	1.46e-05	0.000279647	22	AT1G02390/AT1G11190/AT1G21000/AT1G30700/AT1G32450/AT1G54570/AT1G76680/AT2G25460/AT2G44480/AT2G46950/AT3G25882/AT4G01870/AT4G02380/AT4G10500/AT4G15610/AT4G23810/AT5G24530/AT5G25930/AT5G37600/AT5G44610/AT5G52310/AT5G62165
GO:0010150	leaf senescence	840	AT1G22640	ATMYB3,MYB3	NOVEL	31/1208	198/30167	8.45e-11	3.77e-09	31	AT1G02390/AT1G11190/AT1G30700/AT1G32450/AT1G54130/AT1G54570/AT1G76680/AT2G25460/AT2G30550/AT2G31570/AT2G44300/AT2G46950/AT3G07350/AT3G11340/AT3G25882/AT3G56400/AT4G01870/AT4G02380/AT4G10500/AT4G15610/AT4G23810/AT4G30490/AT4G32940/AT4G36040/AT5G03280/AT5G24530/AT5G25930/AT5G37600/AT5G44610/AT5G52310/AT5G62165
GO:0010150	leaf senescence	841	AT3G56400	ATWRKY70,WRKY70	KNOWN	22/1198	198/30167	1.42e-05	0.000311771	22	AT1G01680/AT1G02390/AT1G30700/AT1G32450/AT1G73500/AT2G18690/AT2G25460/AT2G44300/AT3G25010/AT3G25882/AT4G01870/AT4G02380/AT4G14365/AT4G18980/AT4G23810/AT4G32940/AT5G24110/AT5G24530/AT5G25930/AT5G37600/AT5G51720/AT5G52310
GO:0010150	leaf senescence	842	AT4G12020	ATWRKY19,MAPKKK11,MEKK4,WRKY19	NOVEL	21/1181	198/30167	3.6e-05	0.000979219	21	AT1G02390/AT1G11190/AT1G32450/AT1G73500/AT1G76680/AT2G13810/AT2G25460/AT2G31570/AT2G39200/AT2G44300/AT3G10985/AT3G56400/AT4G02380/AT4G15610/AT4G23810/AT4G32940/AT4G36040/AT5G24530/AT5G37600/AT5G52310/AT5G63130
GO:0010150	leaf senescence	843	AT3G50060	MYB77	NOVEL	27/1195	198/30167	2.3e-08	6.36e-07	27	AT1G02390/AT1G11190/AT1G21000/AT1G30700/AT1G32450/AT1G54570/AT1G73500/AT1G76680/AT2G25460/AT2G31570/AT2G44300/AT2G46950/AT3G07350/AT3G11340/AT3G25882/AT3G56400/AT4G01870/AT4G02380/AT4G10500/AT4G15610/AT4G23810/AT5G24530/AT5G25930/AT5G37600/AT5G52310/AT5G59220/AT5G63130
GO:0010150	leaf senescence	844	AT1G15790	AT1G15790	NOVEL	25/1193	198/30167	3.29e-07	1.24e-05	25	AT1G01680/AT1G02390/AT1G30700/AT1G32450/AT1G66830/AT1G69490/AT2G22300/AT2G44300/AT2G44480/AT3G22910/AT3G25010/AT3G25882/AT3G26210/AT3G52430/AT4G02380/AT4G15610/AT4G23810/AT4G32940/AT5G24110/AT5G24530/AT5G25930/AT5G37600/AT5G52310/AT5G59220/AT5G62000
GO:0010150	leaf senescence	845	AT1G74250	AT1G74250	NOVEL	22/1184	198/30167	1.19e-05	0.000198394	22	AT1G02390/AT1G11190/AT1G32450/AT1G54570/AT2G25460/AT2G31570/AT2G44300/AT2G46950/AT4G01870/AT4G02380/AT4G10500/AT4G15610/AT4G23810/AT4G32940/AT4G36040/AT5G03280/AT5G24530/AT5G25930/AT5G37600/AT5G44610/AT5G52310/AT5G62165
GO:0010150	leaf senescence	846	AT3G12250	BZIP45,TGA6	NOVEL	25/1186	198/30167	2.95e-07	8.54e-06	25	AT1G02390/AT1G11190/AT1G21000/AT1G30700/AT1G32450/AT1G54570/AT1G76680/AT2G18690/AT2G25460/AT2G44300/AT2G46950/AT3G25882/AT4G01870/AT4G02380/AT4G10500/AT4G15610/AT4G23810/AT4G32940/AT4G36040/AT5G24530/AT5G25930/AT5G37600/AT5G44610/AT5G52310/AT5G62165
GO:0010150	leaf senescence	847	AT2G34720	NF-YA4	NOVEL	26/1183	198/30167	7.42e-08	2.05e-06	26	AT1G02390/AT1G30700/AT1G32450/AT1G69490/AT1G76680/AT2G25460/AT2G25625/AT2G31570/AT2G39730/AT2G44300/AT2G46950/AT3G25882/AT3G56400/AT4G01870/AT4G02380/AT4G15610/AT4G23810/AT4G36040/AT5G24530/AT5G25930/AT5G37600/AT5G44610/AT5G52310/AT5G56870/AT5G62165/AT5G63130
GO:0010150	leaf senescence	848	AT2G45880	AT2G45880	NOVEL	19/1179	198/30167	0.000301389	0.00336478	19	AT1G02390/AT1G30700/AT1G32450/AT1G76680/AT2G31570/AT2G44300/AT2G46950/AT3G25882/AT4G01870/AT4G02380/AT4G10500/AT4G15610/AT4G32940/AT5G24530/AT5G25930/AT5G37600/AT5G44610/AT5G52310/AT5G62165
GO:0010150	leaf senescence	849	AT4G39160	AT4G39160	NOVEL	16/1187	198/30167	0.00532839	0.0361685	16	AT1G02390/AT1G32450/AT1G76680/AT2G44300/AT2G46950/AT4G01870/AT4G02380/AT4G10500/AT4G15610/AT4G32940/AT5G24110/AT5G24530/AT5G25930/AT5G37600/AT5G44610/AT5G52310
GO:0010150	leaf senescence	850	AT2G17150	NLP1	NOVEL	19/1174	198/30167	0.000285908	0.00400854	19	AT1G02390/AT1G30700/AT1G32450/AT1G69490/AT1G76680/AT2G44300/AT2G46950/AT3G11340/AT3G60670/AT4G01870/AT4G02380/AT4G12735/AT4G15610/AT4G36040/AT5G24530/AT5G44160/AT5G44610/AT5G52300/AT5G52310
GO:0010150	leaf senescence	851	AT5G25790	AT5G25790	NOVEL	22/1177	198/30167	1.08e-05	0.000296571	22	AT1G02390/AT1G11190/AT1G18210/AT1G32450/AT1G36622/AT1G54130/AT1G76680/AT2G22300/AT2G31570/AT2G43000/AT2G44480/AT3G10985/AT3G25882/AT4G01870/AT4G02380/AT4G15610/AT4G23810/AT4G32940/AT4G36040/AT5G25930/AT5G52310/AT5G62165
GO:0010150	leaf senescence	852	AT1G10170	ATNFXL1,NFXL1	NOVEL	24/1178	198/30167	9.49e-07	2.17e-05	24	AT1G02390/AT1G11190/AT1G21000/AT1G30700/AT1G32450/AT1G76680/AT1G76980/AT2G25460/AT2G39200/AT2G46950/AT3G25882/AT4G01870/AT4G02380/AT4G03550/AT4G10500/AT4G15610/AT4G32940/AT5G03280/AT5G24530/AT5G25930/AT5G37600/AT5G44610/AT5G52310/AT5G62165
GO:0010150	leaf senescence	853	AT1G61660	AtbHLH112	NOVEL	20/1177	198/30167	0.000103314	0.00146652	20	AT1G02390/AT1G21000/AT1G32450/AT1G73500/AT1G76680/AT1G76980/AT2G25460/AT2G46950/AT3G10985/AT3G11340/AT3G56400/AT4G01870/AT4G02380/AT4G15610/AT4G23810/AT4G36040/AT5G25930/AT5G52310/AT5G59220/AT5G63130
GO:0010150	leaf senescence	854	AT2G28200	AT2G28200	NOVEL	30/1164	198/30167	1.59e-10	7.86e-09	30	AT1G02390/AT1G11190/AT1G30700/AT1G32450/AT1G54570/AT1G73500/AT1G76680/AT2G22300/AT2G25460/AT2G30550/AT2G31570/AT2G37750/AT2G39200/AT2G43000/AT2G44300/AT2G46950/AT3G07350/AT3G56400/AT4G01870/AT4G02380/AT4G10500/AT4G15610/AT4G23810/AT4G30490/AT4G32940/AT4G36040/AT5G37600/AT5G44610/AT5G52310/AT5G62165
GO:0010150	leaf senescence	855	AT3G50650	AT3G50650	NOVEL	17/1159	198/30167	0.00173796	0.0173528	17	AT1G02390/AT1G30700/AT1G32450/AT1G54570/AT1G73220/AT1G73500/AT1G76680/AT2G46950/AT3G05400/AT3G11340/AT3G25882/AT4G01870/AT4G15610/AT4G32940/AT4G36040/AT5G44610/AT5G52310
GO:0010150	leaf senescence	856	AT3G51120	AT3G51120	NOVEL	21/1164	198/30167	2.92e-05	0.000631561	21	AT1G01680/AT1G30700/AT1G32450/AT1G76680/AT2G13810/AT2G39200/AT2G44300/AT2G46950/AT3G11340/AT3G25010/AT3G25882/AT4G01870/AT4G02380/AT4G10500/AT4G15610/AT4G32940/AT5G24530/AT5G25930/AT5G44610/AT5G52310/AT5G62165
GO:0010150	leaf senescence	857	AT4G25610	AT4G25610	NOVEL	21/1168	198/30167	3.07e-05	0.000471411	21	AT1G02390/AT1G30700/AT1G32450/AT1G54570/AT1G69490/AT1G76680/AT2G31570/AT2G44300/AT2G46950/AT3G11340/AT4G01870/AT4G02380/AT4G10500/AT4G15610/AT4G32940/AT5G24530/AT5G25930/AT5G37600/AT5G44610/AT5G52310/AT5G62165
GO:0010150	leaf senescence	858	AT4G27410	ANAC072,ANAC72,AtRD26,RD26	NOVEL	27/1166	198/30167	1.39e-08	5.99e-07	27	AT1G01680/AT1G02390/AT1G30700/AT1G32450/AT1G69490/AT1G73500/AT1G76680/AT2G18690/AT2G25460/AT2G25625/AT2G46950/AT3G25010/AT3G25882/AT3G26210/AT3G56400/AT4G01870/AT4G02380/AT4G10500/AT4G23810/AT4G32940/AT5G24110/AT5G24530/AT5G25930/AT5G44610/AT5G51720/AT5G52310/AT5G59220
GO:0010150	leaf senescence	859	AT3G50700	AtIDD2,IDD2	NOVEL	20/1163	198/30167	8.79e-05	0.00158922	20	AT1G02390/AT1G32450/AT1G54570/AT1G76680/AT2G25460/AT2G34610/AT2G39200/AT2G42540/AT2G46950/AT3G25882/AT3G56400/AT4G01870/AT4G02380/AT4G15610/AT4G23810/AT4G32940/AT4G36040/AT5G25930/AT5G52310/AT5G56870
GO:0010150	leaf senescence	860	AT3G59060	A-PUT2,bHLHb1,PIF5,PIL6	NOVEL	22/1149	198/30167	7.45e-06	0.000221639	22	AT1G02390/AT1G18210/AT1G73500/AT1G76680/AT2G13810/AT2G31570/AT3G10985/AT3G25882/AT4G01250/AT4G10500/AT4G14370/AT4G15610/AT4G23810/AT4G36040/AT5G24530/AT5G25930/AT5G37600/AT5G44610/AT5G52310/AT5G62000/AT5G62165/AT5G64940
GO:0010150	leaf senescence	861	AT1G75340	AT1G75340	NOVEL	20/1151	198/30167	7.64e-05	0.00127985	20	AT1G02390/AT1G11190/AT1G30700/AT1G32450/AT1G69490/AT1G76680/AT2G13810/AT2G31570/AT2G39200/AT2G44300/AT2G46950/AT3G05400/AT3G25010/AT3G25882/AT4G01870/AT4G10500/AT5G25930/AT5G44610/AT5G52310/AT5G62165
GO:0010150	leaf senescence	862	AT5G47140	GATA27	NOVEL	27/1151	198/30167	1.06e-08	3.58e-07	27	AT1G02390/AT1G11190/AT1G21000/AT1G30700/AT1G32450/AT1G54570/AT1G73500/AT1G76680/AT2G18690/AT2G25460/AT2G31570/AT2G35980/AT2G44300/AT2G46950/AT3G11340/AT3G56400/AT4G01870/AT4G02380/AT4G10500/AT4G15610/AT4G23810/AT4G32940/AT4G36040/AT5G24530/AT5G37600/AT5G44610/AT5G52310
GO:0010150	leaf senescence	863	AT4G17570	GATA26	NOVEL	20/1145	198/30167	7.12e-05	0.00104984	20	AT1G02390/AT1G32450/AT1G54570/AT1G76680/AT2G25460/AT2G31570/AT2G39200/AT2G44300/AT2G46950/AT3G56400/AT4G01870/AT4G02380/AT4G15610/AT4G23810/AT5G24530/AT5G25930/AT5G37600/AT5G44610/AT5G52310/AT5G62165
GO:0010150	leaf senescence	864	AT1G64380	AT1G64380	NOVEL	18/1146	198/30167	0.000587601	0.00622667	18	AT1G02390/AT1G32450/AT1G36622/AT1G76680/AT2G25460/AT3G10985/AT4G02380/AT4G10500/AT4G14365/AT4G15610/AT4G32940/AT4G36040/AT5G24110/AT5G24530/AT5G25930/AT5G37600/AT5G52310/AT5G62165
GO:0010150	leaf senescence	865	AT3G09230	AT3G09230	NOVEL	18/1142	198/30167	0.000564273	0.00487799	18	AT1G02390/AT1G11190/AT1G32450/AT1G76680/AT2G25460/AT2G39200/AT2G44300/AT2G46950/AT4G01870/AT4G02380/AT4G10500/AT4G15610/AT4G32940/AT5G24110/AT5G25930/AT5G44610/AT5G52310/AT5G56870
GO:0010150	leaf senescence	866	AT1G76320	AT1G76320	NOVEL	20/1134	198/30167	6.24e-05	0.00115944	20	AT1G01680/AT1G02390/AT1G30700/AT1G32450/AT1G73500/AT1G76680/AT2G13810/AT2G35980/AT2G44300/AT2G46950/AT4G01870/AT4G02380/AT4G10500/AT4G15610/AT4G32940/AT5G24530/AT5G25930/AT5G44610/AT5G52310/AT5G62165
GO:0010150	leaf senescence	867	AT1G47870	ATE2F2,ATE2FC,E2FC	NOVEL	17/1135	198/30167	0.00139331	0.0145664	17	AT1G02390/AT1G11190/AT1G30700/AT1G32450/AT1G76680/AT2G35980/AT2G37750/AT2G44300/AT2G46950/AT3G11340/AT4G01870/AT4G02380/AT4G15610/AT4G32940/AT5G44160/AT5G44610/AT5G52310
GO:0010150	leaf senescence	868	AT4G18880	AT-HSFA4A,HSFA4A	NOVEL	34/1138	198/30167	1.34e-13	6.6e-12	34	AT1G02390/AT1G21000/AT1G30700/AT1G32450/AT1G66880/AT1G73500/AT1G76680/AT1G76980/AT2G18690/AT2G25460/AT2G30550/AT2G31570/AT2G39200/AT2G44300/AT2G44480/AT2G46950/AT3G25882/AT3G52430/AT3G56400/AT4G01870/AT4G02380/AT4G10500/AT4G14365/AT4G15610/AT4G23810/AT4G32940/AT5G24110/AT5G24530/AT5G25930/AT5G37600/AT5G44610/AT5G52310/AT5G62165/AT5G63130
GO:0010150	leaf senescence	869	AT3G09370	AT3G09370	NOVEL	17/1130	198/30167	0.00132933	0.0129023	17	AT1G02390/AT1G11190/AT1G30700/AT1G32450/AT1G54570/AT1G69490/AT1G76680/AT2G39200/AT2G46950/AT3G25882/AT4G01870/AT4G02380/AT4G10500/AT4G32940/AT5G25930/AT5G44610/AT5G52310
[truncated: 158 more rows]

## Sheet: S4
Supplemental Table S4. Overview of number of target genes predicted from DEGRN, EXPLICIT, iGRN, and AtRegNet
TF Locus	TF Symbol	iGRN	EXPLICT	AtRegNet	DEGRN
AT1G01010	ANAC001,NAC001,NTL10	653	512	-	3304
[truncated: 1,491 more rows]

## Sheet: S5
Supplemental Table S5. Overview of number of target genes for different TF family
[truncated: 53 more rows]

[truncated: 7 more sheets: S6, S6-a, S6-b, S6-c, S6-d, S7, S8]
